# Supplementary material for: Changes in Energy Metabolism Trigger Pupal Diapause Transition of Bactrocera minax After 20-Hydroxyecdysone Application
Source: Front Physiol. 2019 Oct 30;10:1288. doi: 10.3389/fphys.2019.01288 (PMC6831740; doi:10.3389/fphys.2019.01288)
Supplement: Supplementary Table S2 — The abundance and function annotation of all identified proteins through MS/MS ion search with cutoff MascotPercolator Q ≤ 0.01. [file Table_2.XLS]

No.	Protein_ID	Description	Mass	Protein Coverage	Uniq_Pep_Num	Uniq_Spec_Num	Sameset	Mean_Ratio_2d-VS-ck	Ratio_2d-VS-ck	SD_2d-VS-ck	Quant_Num_2d-VS-ck	Qvalue_2d-VS-ck	Mean_Ratio_5d-VS-ck	Ratio_5d-VS-ck	SD_5d-VS-ck	Quant_Num_5d-VS-ck	Qvalue_5d-VS-ck	Mean_Ratio_2d-VS-1d	Ratio_2d-VS-1d	SD_2d-VS-1d	Quant_Num_2d-VS-1d	Qvalue_2d-VS-1d	Mean_Ratio_1d-VS-ck	Ratio_1d-VS-ck	SD_1d-VS-ck	Quant_Num_1d-VS-ck	Qvalue_1d-VS-ck	Mean_Ratio_5d-VS-1d	Ratio_5d-VS-1d	SD_5d-VS-1d	Quant_Num_5d-VS-1d	Qvalue_5d-VS-1d	Mean_Ratio_5d-VS-2d	Ratio_5d-VS-2d	SD_5d-VS-2d	Quant_Num_5d-VS-2d	Qvalue_5d-VS-2d	Protein_ID	Protein_Seqence	NCBInr Identity	NCBInr E-value	NCBInr Accession	NCBInr Description	Swissprot Identity	Swissprot E-value	Swissprot Accession	Swissprot Description	Tremble Identity	Tremble E-value
1	CL2114.Contig1_17	GJ21096 [Drosophila virilis]	21567.000855	0.999	11	121	-	1.12	1.077|1.157	0.003	114|118	0.105|0.001	1.18	1.130|1.231	0.005	115|111	0.001|0.001	0.9	0.905|0.889	0.000	118|121	0.031|0.001	1.26	1.349|1.172	0.016	117|120	0.001|0.001	0.96	0.953|0.976	0.000	119|118	0.076|0.457	1.1	1.123|1.071	0.001	109|120	0.001|0.084	CL2114.Contig1_17	MSVVPLMFRDWWDDFEFPTRTSRLLDQHFGTGLRRDDLLSSVWNSRPTMLRSGYLRPWQRSPTSLQKQESGSTLNIDKEKFEVILDVQQFTPSEITVKVTDKFVLVEGKHEERQDEHGFVSRQFSRRYMLPSDVNPDNVSSSLSSDGLLTITAPLKKLPPPATERVVPISQTGPSSKEDNAKKIETTTT	87.83	1e-94	gi|195380159|ref|XP_002048838.1|	GJ21096 [Drosophila virilis]	83.07	2e-89	sp|P82147|L2EFL_DROME	Protein lethal(2)essential for life OS=Drosophila melanogaster GN=l(2)efl PE=1 SV=1	87.83	5e-94
2	Unigene32466_17	GA22939 [Drosophila pseudoobscura pseudoobscura]	46254.9061160001	0.146	4	21	-	0.97	0.991|0.944	0.001	21|21	0.947|0.501	0.52	0.544|0.492	0.001	20|20	0.001|0.001	0.46	0.435|0.487	0.001	20|18	0.001|0.001	2.18	2.149|2.218	0.002	18|20	0.001|0.001	0.27	0.265|0.269	0.000	18|18	0.000|0.000	0.53	0.561|0.495	0.002	20|20	0.001|0.001	Unigene32466_17	MTTAKITRLTLLLLFASSVAVAAQEASGHGVTQGIKCYGKEYVCVGPLNYKHCEWNSQGNTYATGNAIQCPPNHRCVSDGVEICIPLKLSTTAPQAEHLLTSEQIPINSISTEDPIKMIPLNWESTSTIPDTTTNIEVNEDPSSILIDTTTATDGSIWTTFLTEKPSSYNTLEPQSTDPNFHFTTSPLLESTTDAILETTSFQYETTTTSDTYVTLTPIISDASSIPVNFNNPLKTRSIAEVTRMVLNRTALENQASETISIRNIPADPDFPENSLANSNISVNPHSAISPIESLDSITEIYPKTTVSANQEQYVTFETKAPIDSNLLISPDSSILTTQREQLNSYKSSTPVDLSVSNLTNKTPGEHSRLGEHSSNVDPNIPIELSSSTDPTKTTNPPN…	46.03	3e-10	gi|195439238|ref|XP_002067538.1|	GK16139 [Drosophila willistoni]	-	-	-	-	46.03	1e-09
3	Unigene15450_17	125 1594 minus strand dihydrolipoamide succinyltransferase [Glossina morsitans morsitans]	52423.593336	0.029	1	14	-	0.85	0.814|0.876	0.002	13|13	0.015|0.193	0.75	0.783|0.726	0.002	14|13	0.001|0.001	0.86	0.844|0.880	0.001	14|13	0.035|0.065	1	0.999|0.996	0.000	13|14	0.996|0.971	0.75	0.730|0.772	0.001	14|10	0.000|0.001	0.95	0.950|0.959	0.000	13|11	0.480|0.574	Unigene15450_17	MSGLILITVRRFPRDVLKLGMQAARTQEVKSACVIRQFSKLAVVTQTQVLRDRESFSSVAYSSPQRTIGSFGAQGFHTTSNLWTTETVKTPPFPESVAEGDVRFTVKVGDYVAQDQVVMEVETDKTAMPVPAPFGGVIREILVEDGTTVKAGQPLFKIEKADGTPTVAAPAAAATPPPKPSAPAPAPAAPAAAAPSPKAAPPAARPPPPPAARAIPPPPPPKPSAPVGQIPIASVPPAQAAPQIKVPPGDYSRQITGTRTEQRVKMNRMRLKIASRLKDAQNTNAMLTTFNEIDMSAAMEFRKANLDAFQKKFGIKIGFMSIFSKACAYALQDQPVVNAVIDGQEIVYRDYVDISVAVATPKGLVVPVIRNVESMNYADIEIALAALGEKAKRNAIAIE…	81.58	2e-125	gi|189239144|ref|XP_971313.2|	PREDICTED: similar to dihydrolipoamide succinyltransferase component of 2-oxoglutarate dehydrogenase [Tribolium castaneum]	73.75	2e-102	sp|Q90512|ODO2_TAKRU	Dihydrolipoyllysine-residue succinyltransferase component of 2-oxoglutarate dehydrogenase complex, mitochondrial (Fragment) OS=Takifugu rubripes GN=dlst PE=3 SV=1	87.55	2e-130
4	Unigene15591_17	150 605 fat body protein [Glossina morsitans morsitans]	17422.621545	0.533	6	133	-	0.76	0.778|0.750	0.000	128|127	0.001|0.001	0.82	0.851|0.793	0.002	121|119	0.001|0.001	0.76	0.764|0.758	0.000	126|128	0.001|0.001	1.01	0.999|1.021	0.000	124|125	0.993|0.408	0.8	0.801|0.805	0.000	126|114	0.000|0.000	1.07	1.052|1.080	0.000	121|132	0.134|0.052	Unigene15591_17	MSLFKVCTFLAAISLAVAASIDFKTCGDVDACTIHEVRVDPCPQASEHLACHIRRRRPATMSFDFTTNFAAETLEAGLVWQKSATQDLPLITMDKEACKYTPCPTVANQRQTYTMDVPIESKFPINPYTIKWTLKAPTGQVCCFTIDIKVVR	61.65	8e-44	gi|194765124|ref|XP_001964677.1|	GF23312 [Drosophila ananassae]	34.68	5e-12	sp|B0FHH8|ML1P_MANSE	MD-2-related lipid-recognition protein OS=Manduca sexta PE=1 SV=1	65.65	5e-46
5	Unigene15714_17	GF18192 [Drosophila ananassae]	59851.946705	0.044	2	2	-	1.54	1.633|1.452	0.016	2|2	0.212|0.306	1.32	1.184|1.463	0.039	2|2	0.745|0.442	1.86	1.838|1.879	0.001	2|2	0.128|0.085	0.87	0.767|0.972	0.021	2|2	0.534|0.943	1.43	1.591|1.262	0.054	2|2	0.184|0.641	0.88	0.875|0.884	0.000	2|2	0.826|0.828	Unigene15714_17	MQPQIVLLKEGTDTSQGKPQLISNINACQSILDAVRTTLGPRGMDKLIVDSTGKATISNDGATIMKLLDIVHPAAKTLVDIAKSQDAEVGDGTTSVVLLAGEILKQVKPFVEEGVHARIIIKAISKALHLCMIKINEIAVHVEAQSKEQQRALLEKCAATAMSSKLIHQQKDFFAKMVVDTVLSLDELLPLNMIGIKKVSGGSLEESELVTGVAFKKTFSYAGFEMAPKSYQNCKIALLNIELELKAERDNAEVRVDNVKEYQKIVDAEWQILYKKLDKIHESGANVVLSNLPIGDVATQYFADRDMFCAGRVPEEDLKRTMKACGGAVMTTANDINPSVLGLCEYFEERQIGGERFNIFQGCPNAKTCTLILRGGAEQFLEETERSLHDAIMIVRRTI…	91.43	0.0	gi|194743568|ref|XP_001954272.1|	GF18192 [Drosophila ananassae]	77.48	0.0	sp|Q5ZJK8|TCPH_CHICK	T-complex protein 1 subunit eta OS=Gallus gallus GN=CCT7 PE=1 SV=1	91.43	0.0
6	CL832.Contig1_17	GJ15014 [Drosophila virilis]	22208.164468	0.287	3	27	-	0.86	0.869|0.846	0.000	26|25	0.012|0.001	0.79	0.835|0.740	0.005	26|23	0.001|0.001	0.86	0.773|0.949	0.015	25|26	0.001|0.391	1.02	0.846|1.188	0.058	27|27	0.001|0.001	0.8	0.880|0.710	0.014	25|27	0.000|0.000	0.95	0.945|0.961	0.000	26|27	0.238|0.617	CL832.Contig1_17	ADENGFQPSGDALPTPPPIPEEIAKALAAQGISAAPGGGYTGGPGTGAGVYGGAGGGAGAGGYGGAGRGGTGGGYGGGAGGRGTGGAPGFGGGSGAGGAPGFGGGAGGRGAGGAPGYGSGPGAGGAPGFGGGAGGRGAGGAPGYGSGPGAGGAPGFGGGAGGRRPGGPGAGGFGGGAGGGPGAGGAGGGAGGYNYGPGGSGAGGAPGFGGGAGRPGTGGGAPGFGGGAGGRGTGGAGGQGGYGGGAGAPGFGGGAGGRGPGGAGGSPGFGGGAGGRGPGGAG	87.88	1e-07	gi|195483488|ref|XP_002090306.1|	GE13038 [Drosophila yakuba]	-	-	-	-	87.88	5e-07
7	Unigene7664_17	GI11295 [Drosophila mojavensis]	72990.6502700001	0.020	1	1	-	0.66	0.627|0.684	0.002	1|1	0.468|0.522	0.76	0.791|0.724	0.002	1|1	0.715|0.666	0.96	0.937|0.982	0.001	1|1	0.952|0.979	0.68	0.685|0.671	0.000	1|1	0.453|0.339	1.1	1.057|1.145	0.004	1|1	0.959|0.880	1.13	1.192|1.070	0.007	1|1	0.819|0.931	Unigene7664_17	LRLVTAIGFACLLVSLNGCAAENLNRSFTIDHVANTFLMDGLPFRYISGSFHYFRALPQVWAERLKTMHAAGLNAIDTYIEWSLHNPHDGIYNWDGIADIERFLELAQKEGFYVVLRPGPYICAERDNGGLPHWLFTKYPEIKVRTSDPYYQLEVSKWYENLMPRLQRFLYGNGGPIIMVQVENEYGAFYACDAKHLRWLHDETRKYVQGNAVLFTTDQPNDGLKCGKIEGVHATVDFGIGSNFDQQWRAMRSVQPSGPLVNSEFYPGWLTRWGEKNQRRDGIEVANSLRRILEAGASVNFYMFFGGTNFGFTAGANNYGKDYVADITSYDYDGVMDEAGNVTKKFEMIRKVIADFIDVPQEETCNGCIKTPSFAYGNVTLKPVANLLSEVGRTTLAKG…	59.17	0.0	gi|195116355|ref|XP_002002721.1|	GI11295 [Drosophila mojavensis]	43.29	4e-124	sp|Q9TRY9|BGAL_CANFA	Beta-galactosidase OS=Canis familiaris GN=GLB1 PE=2 SV=3	59.17	0.0
8	CL45.Contig1_17	GK22061 [Drosophila willistoni]	23479.698098	0.118	1	2	CL45.Contig2_17	0.92	0.807|1.036	0.026	2|2	0.665|0.955	0.87	1.084|0.659	0.090	2|2	0.895|0.377	0.78	0.820|0.749	0.003	2|2	0.706|0.470	1.24	1.475|1.008	0.109	2|2	0.242|0.979	0.8	0.512|1.093	0.169	2|2	0.054|0.899	0.96	1.253|0.664	0.173	2|2	0.629|0.321	CL45.Contig1_17	AAKSLLPLLVATIVGSALAQSPVDWQPLLDQQNLVLRQVVQTLHLTRGGPVGPEETDACFDWYLNNQTAINEVYYKEYNECINTATAAKKLLSAQSALERNDLLDDGYSLCSALSACESIVDGLRFFQCYNKASSGNSPNLFNITVTSERIVEKLKISYQAINDTERVCTTNARVNNVNDLSTSRLQLNNCLIGDWSPPNGQQVTPATEAP	32.67	2e-16	gi|195436513|ref|XP_002066212.1|	GK22061 [Drosophila willistoni]	-	-	-	-	32.67	8e-16
9	Unigene31069_17	GI18515 [Drosophila mojavensis]	11275.719669	0.183	1	1	-	1.82	2.261|1.386	0.383	1|1	0.246|0.603	1.72	1.041|2.407	0.933	1|1	0.972|0.262	1.59	1.553|1.623	0.002	1|1	0.570|0.437	1.26	0.985|1.536	0.152	1|1	0.989|0.318	1.13	1.431|0.830	0.181	1|1	0.581|0.819	0.89	0.759|1.028	0.036	1|1	0.660|0.980	Unigene31069_17	EERKKNRRRYPYLDVEMDYYDPEDEKLMQSMLKNALDYLAKNPKYVLASMPDAHKLPSLLSWMETRYGKTYTREQLVKMHVKTRPTFHALKQM	42.22	6e-14	gi|195124139|ref|XP_002006551.1|	GI18515 [Drosophila mojavensis]	-	-	-	-	42.22	3e-13
10	Unigene30416_17	GG22113 [Drosophila erecta]	26315.176611	0.119	2	2	-	0.84	0.982|0.703	0.039	2|2	0.974|0.342	0.79	1.001|0.587	0.086	2|2	0.998|0.189	0.64	0.564|0.724	0.013	2|2	0.133|0.411	1.35	0.989|1.718	0.266	2|2	0.984|0.028	0.62	0.632|0.602	0.000	2|2	0.190|0.186	0.93	1.005|0.863	0.010	2|2	0.995|0.768	Unigene30416_17	KSIIPARVNPDLEKERRSASFNVEEFQCWWYGGAEKLKEKREIETYLYKDLRDGHLHDYLSHEDAYHLALKDVTEAAVKLRKLQQIRNPGGNDIWPKLLYDYHMTALMPANYPFATHITMFVDVLYNQGTPEQVEKFAKPAANCNIIGTYAQTELAHGTNVRGIETRADYDRKTDEFVLNTPNMQAYKWWPGGLGHTANHAMVVAQLYIDGKHHGIQMFIVQLRDLE	69.43	2e-92	gi|194881908|ref|XP_001975055.1|	GG22113 [Drosophila erecta]	50.22	3e-56	sp|Q7KML2|ACOX1_DROME	Probable peroxisomal acyl-coenzyme A oxidase 1 OS=Drosophila melanogaster GN=CG5009 PE=1 SV=1	69.43	7e-92
11	Unigene7347_17	GI17730 [Drosophila mojavensis]	43287.616627	0.198	5	9	-	1.14	1.261|1.016	0.030	8|7	0.021|0.939	1.31	1.343|1.267	0.003	8|9	0.001|0.020	1.55	1.502|1.603	0.005	9|7	0.001|0.001	0.7	0.629|0.777	0.011	7|8	0.001|0.030	1.75	1.674|1.824	0.011	9|6	0.001|0.000	1.15	1.165|1.127	0.001	9|5	0.087|0.375	Unigene7347_17	ALTSIATYQMARRTSGRQVRYLIVGVGFATSASISFVNLEAERKRKLNTSIYMAEPITDTNTLIDNEDDMRTRMELMVMKIQADVCRALEAEEYAGQKFKVDRWHRTEGGGGITCVLQDGEVFEKAGVNISVVTGMLPPGAVQQMCTRGKNLAQGKKLPFFATGVSAVIHPRNPHVPTIHFNYRYFEVESDGQKQWWFGGGTDLTPYYLNEKDAVHFHKTLKDACDEHNSSYYPRFKKWCDDYFRITHRKESRGIGGIFFDDLDTPNQEEAFKFVTGCANSVIPSYLPLVRQHKNDDYGDKERQWQLLRRGRYVEFNLIYDRGTKFGLYTPGARYESILMSLPLTARWEYMHTVQPNSKEGKLLEVLQNPKEWI	73.54	6e-167	gi|195117130|ref|XP_002003102.1|	GI17730 [Drosophila mojavensis]	70.94	1e-163	sp|Q9V3D2|HEM6_DROME	Coproporphyrinogen-III oxidase OS=Drosophila melanogaster GN=Coprox PE=1 SV=1	73.54	2e-166
12	Unigene14704_17	SBP1=protease inhibitor [Sarcophaga bullata=larvae, hemolymph, Peptide, 57 aa]	6765.01858	0.772	3	23	-	0.84	0.800|0.870	0.002	23|23	0.001|0.128	0.86	0.838|0.875	0.001	22|23	0.012|0.185	0.77	0.684|0.853	0.014	23|20	0.001|0.093	1.12	1.092|1.156	0.002	22|23	0.035|0.003	0.77	0.786|0.749	0.001	22|23	0.004|0.001	1.03	1.065|0.997	0.002	23|23	0.638|0.991	Unigene14704_17	VDKSACSQPKEVGPCRKSDPKFFYNSESKACENFIYGGCQGNDNRFDTKEECEKLCL	82.46	2e-20	gi|134256|sp|P26228.1|SBPI_SARBU	RecName: Full=Protease inhibitor; AltName: Full=SBPI	82.46	3e-21	sp|P26228|SBPI_SARBU	Protease inhibitor OS=Sarcophaga bullata PE=1 SV=1	63.16	2e-14
13	Unigene33874_17	GI12921 [Drosophila mojavensis]	70158.9133740001	0.015	1	1	-	0.78	0.919|0.641	0.039	1|1	0.926|0.441	0.85	1.001|0.700	0.045	1|1	0.998|0.657	0.92	1.012|0.835	0.016	1|1	0.992|0.821	0.84	0.704|0.972	0.036	1|1	0.569|0.955	1.02	0.991|1.051	0.002	1|1	0.990|0.963	1.17	1.072|1.271	0.020	1|1	0.924|0.763	Unigene33874_17	PLPLQAGIEERCRLSLEHISAGIACLKFFNTSEEKFIKESEVRAKDEEKQRILHEEQHPNMAKPFKPIPLPYESLSKQVSNSETEENKNSIDEIADDSQSVHNEKDKKSKKSKVKRNKGKELKESQNDKIDVNQAQIQPQAEDKRIAAKFNTQHFGSWNMHLKLLLLEKACLTYATYAEYHYVEQKYGRCLKAIYMACRCQQVVLKYMSDIVSQKSCLLGRAGDCFFQMAKNWQDIDSYLEQFNEVSEIAQNINNELVKDLNGDDIIELITPIANIEHLMLSSCKCYENAIECVNEIIATDEDAKGELLRRLGNVRNELGLKYMYWAQEEYAKDMEKKSNKSPDESASTEASTLDESQTDETEKDEAEKPEEAVYMKLAMKSYDSLIRGISAFNEVQDN…	54.41	4e-180	gi|194748911|ref|XP_001956885.1|	GF24346 [Drosophila ananassae]	29.91	2e-43	sp|Q3B7T1|EDRF1_HUMAN	Erythroid differentiation-related factor 1 OS=Homo sapiens GN=EDRF1 PE=1 SV=1	54.41	1e-179
14	Unigene14615_17	GJ15633 [Drosophila virilis]	14060.974483	0.281	3	14	-	0.82	0.852|0.794	0.002	13|13	0.048|0.025	0.75	0.822|0.679	0.010	13|13	0.001|0.001	0.76	0.683|0.834	0.011	11|11	0.001|0.007	1.13	1.042|1.227	0.017	14|14	0.545|0.001	0.71	0.697|0.714	0.000	14|10	0.000|0.000	0.86	0.928|0.798	0.008	12|13	0.139|0.003	Unigene14615_17	RQSAFFQSFLLFTVTLVLLLLHSSTTEAYSGLIPPDPDNPGKCIYRGDELKLGVNLGIAPCQRLTCNKDGSIFIEGCGRLRIENCNNGERIHMDKPFPECCKLRYKCKKPDGSPYYIERDA	75.51	2e-37	gi|284011062|gb|ADB57064.1|	RE35169p [Drosophila melanogaster]	-	-	-	-	75.51	1e-36
15	Unigene31960_17	226 1548 minus strand PREDICTED: proteoliaisin-like [Saccoglossus kowalevskii]	51004.268733	0.032	1	3	-	0.96	1.010|0.911	0.005	3|3	0.975|0.720	1.05	1.067|1.025	0.001	3|3	0.877|0.957	0.72	0.810|0.634	0.015	3|3	0.343|0.045	1.35	1.463|1.235	0.026	3|3	0.038|0.243	0.79	0.714|0.867	0.012	3|3	0.095|0.637	1.08	1.042|1.114	0.003	3|3	0.919|0.694	Unigene31960_17	SNDDWPCNDKANASIPESKVCNGFVDCSNGRDETAKICFPKVCNEQQYRCAYGACISAELKCNKQIDCFDRSDETDFLCDPTEVVFEKIQGTCSEEEFQCDSGECIDEVDMCNGFADCLDASDETVNACAHLECSDASFRCAYGACLSLEQVGNQVWDCADGSDEPAVVVVITDTVKEVEKGKDEAKPDTCNIPYDRPYMLISLNKTGEMDKTLSTFNKILRNDTVFFKCLSGFDLIGVDHLKCVDNDWYRQWPKCASMALLTPCKANKVACSSGDCIDPALICNGVKDCTDGSDEVLPKCVNRTCTENEYKCKYGACIPKDKLCDTNIDCADGSDETILLCTEDYDKCTNILQGNCDSNELVQCRSKECISNEDLCNGIIDCSDGSDETVEMCAHIVC…	32.60	7e-41	gi|291244677|ref|XP_002742221.1|	PREDICTED: proteoliaisin-like [Saccoglossus kowalevskii]	30.10	9e-25	sp|A2ARV4|LRP2_MOUSE	Low-density lipoprotein receptor-related protein 2 OS=Mus musculus GN=Lrp2 PE=1 SV=1	44.38	5e-33
16	Unigene14575_17	GF18406 [Drosophila ananassae]	49066.4551	0.255	8	23	-	1.24	1.288|1.182	0.006	23|23	0.001|0.048	1.34	1.285|1.388	0.005	23|23	0.001|0.001	1.2	1.211|1.180	0.000	23|23	0.025|0.069	1.04	1.003|1.071	0.002	22|23	0.964|0.219	1.27	1.328|1.214	0.006	23|23	0.001|0.023	1.05	1.011|1.095	0.004	23|22	0.923|0.244	Unigene14575_17	MATGTLYTYPENFRAYKALIAAQYSGAQVKVAENFVFGETNKSAEFLKKFPSGKVPAFETAEGKCLSESNAIAFYVANEQLRGGKCPLAQAEVLQWLSYADNEIVPASCSWVFPLLGIMPQQKNSTAKQDVTNILSLLNNKLLNSTFLVGERITLADIVIFSSMLHLYQYVLEPKVRAEFGNVNRWFVTILNQPQVRAVVKNYTLCESALVFDPKKYSEFIGKAGGASDKKQQAKSKEEKKSKEEKKKEKPKEELDAAEEALLAEPKSKDPFDSMPKGTFNFDDFKRSYSNEDESVSIPYFWQKFDPENYSIWFGEYKYNDELSKVFMSCNLITGMFQRLDKMRKQAFASVCLFGEDNNSTISGIWVWCGQDLAFTLSPDWQIDYDCYSWKKLDASSEE…	77.49	0.0	gi|25012528|gb|AAN71367.1|	RE32823p, partial [Drosophila melanogaster]	77.49	0.0	sp|Q9NJH0|EF1G_DROME	Elongation factor 1-gamma OS=Drosophila melanogaster GN=Ef1gamma PE=2 SV=2	78.47	5e-180
17	Unigene14417_17	GK20039 [Drosophila willistoni]	32089.381561	0.230	4	7	-	1.5	1.568|1.436	0.009	7|6	0.002|0.003	1.43	1.366|1.498	0.009	7|7	0.001|0.008	1.83	1.790|1.867	0.003	7|6	0.001|0.001	0.82	0.795|0.836	0.001	7|6	0.083|0.025	1.68	1.807|1.551	0.033	7|7	0.021|0.002	0.94	0.889|0.986	0.005	7|6	0.337|0.930	Unigene14417_17	IPGRALHYVLKIGNRGKNSYFFRDILGMKVLRHEEFTEGCEAQCNGPYDNRWSKTMIGYGPESSHFVIELTYNYGVKEYELGNDFGGITIKSKETIERARSQNYPISQEQGLHVLTSPDGYKFFIIEEPQPQQIDPVLSVILHSSNLSASKTYWHELLKMNVEDEDSNVITLSYGKNQARLTLKQLTDPINRAKAYGRIAFAVPLNVQPAIDAIIRQADGTILTPLITLDTPGKATVRVIILADPDGHEICFVDEEGFSELSKVEVDGEKNLTKYIRKDPFQE	67.61	2e-105	gi|198469530|ref|XP_002134335.1|	GA25437 [Drosophila pseudoobscura pseudoobscura]	50.53	4e-74	sp|Q9CPV4|GLOD4_MOUSE	Glyoxalase domain-containing protein 4 OS=Mus musculus GN=Glod4 PE=2 SV=1	67.61	7e-105
18	CL1137.Contig1_17	164 628 minus strand putative 15.6 kDa secreted salivary gland protein [Stomoxys calcitrans]	16919.349365	0.123	1	1	-	1.93	2.176|1.681	0.123	1|1	0.187|0.364	0.9	0.865|0.944	0.003	1|1	0.834|0.952	2.27	2.430|2.118	0.049	1|1	0.173|0.219	0.84	0.796|0.887	0.004	1|1	0.683|0.832	1.07	1.185|0.961	0.025	1|1	0.832|0.972	0.48	0.406|0.549	0.010	1|1	0.176|0.303	CL1137.Contig1_17	VTDTYSQTIAGDVIVYLNATYWRCDLILCPAGTDQCVVTKSISPTEPRDLIRRNICVSSTNEKIVDETVTEPIKPFENINFKLVVSSSGSSVVQESSSSNIYTSYSGESATANAAANAAAHAAASTAQINRHIARTLQQTGEAVRRSLQEAQEDF	33.33	6e-06	gi|63148848|gb|AAY34546.1|	putative 15.6 kDa secreted salivary gland protein [Stomoxys calcitrans]	-	-	-	-	-	-
19	Unigene32561_17	GJ22484 [Drosophila virilis]	42083.204118	0.299	8	42	-	0.62	0.540|0.705	0.014	41|40	0.001|0.001	0.77	0.761|0.786	0.000	41|42	0.001|0.001	0.75	0.712|0.780	0.002	40|35	0.001|0.001	0.83	0.869|0.798	0.003	33|39	0.001|0.001	0.9	0.854|0.937	0.003	34|39	0.000|0.225	1.18	1.241|1.123	0.007	36|38	0.001|0.001	Unigene32561_17	MFDFNLEFARGGAAVATELFELLSVGGVKQNIVFSPFSIQTCAALAFAGASGETADQIAEGLKFASNFHPEVASTFAFVFDKYKDSELLKIANKVYVQQGHALKPDYKSELKESYNAEAETVNFEESENTASAINSWIEDKTAGKIKDFVQASAFNALTRCVLLNALHFKGLWAHKFEEEQTAEDDFWISEDESVKVQYMNQKAKLGYGYFEELDCQALELPYKNSDLSMLVLLPNEREGLKSLAEKLKTVNLVDLVGNLDANEDVLVKLPKFKVEFEVELTEILKKLGISKIFNEEADFSNMLESAEALQVSNVFHKAVIEVNEEGTEAAAANAMIMMTRCLLMPLQFVADRPFFYVIWNKRNILFAGAFVNAP	69.60	3e-148	gi|195384693|ref|XP_002051049.1|	GJ22484 [Drosophila virilis]	37.06	6e-54	sp|Q9D154|ILEUA_MOUSE	Leukocyte elastase inhibitor A OS=Mus musculus GN=Serpinb1a PE=1 SV=1	69.60	1e-147
20	CL496.Contig1_17	GA25581 [Drosophila pseudoobscura pseudoobscura]	9979.712674	0.106	1	1	-	0.96	1.141|0.770	0.069	1|1	0.873|0.690	0.71	0.807|0.612	0.019	1|1	0.745|0.509	1.19	1.295|1.090	0.021	1|1	0.757|0.917	0.79	0.664|0.922	0.033	1|1	0.474|0.885	0.9	0.937|0.864	0.003	1|1	0.949|0.869	0.82	0.767|0.875	0.006	1|1	0.683|0.873	CL496.Contig1_17	MGERYNIHSQLEHLQSKYIGTGHADTTKFEWLTNQHRDSLASYMGHYDMLNYFAIAENESKARIRFNLMERMLQPCGPPPEKADD	96.47	3e-44	gi|195159500|ref|XP_002020616.1|	GL15204 [Drosophila persimilis]	95.29	1e-44	sp|Q9VHI4|SF3B5_DROME	Probable splicing factor 3B subunit 5 OS=Drosophila melanogaster GN=CG11985 PE=1 SV=1	96.47	2e-43
21	Unigene15899_17	GH13433 [Drosophila grimshawi]	86644.2621959999	0.259	11	43	-	1.3	1.340|1.259	0.003	43|42	0.001|0.001	1.3	1.220|1.379	0.013	42|43	0.001|0.001	1.12	1.074|1.161	0.004	42|43	0.330|0.008	1.18	1.121|1.231	0.006	43|41	0.024|0.001	1.11	1.215|1.009	0.021	41|42	0.000|0.927	0.99	0.926|1.046	0.007	43|43	0.170|0.727	Unigene15899_17	MGKTQSKRSVDITTEPKKNPDEEVTGKLEKIEDLDQKPVNGDASSQENVETEALQKKDGDETENDKDLTTEKSGGDSGAQDGGGDSNTGQSNASAVESASKEDVSTGPKDGNKSTEEISPLSDENNKKPKKEKVKKKWSFRSISFGKKDKQKPAKAEDAATENTAATNGDAAAQVGDGAATEETAEKVQKDGAAGDSGEKKSNEKPTENGESSEKELNGEKTSTSTTPIEEQPAKDISSNENTTNITNNTTETTSSVVIEKSSTTTTENNQTEKQTTTTATATNLAAETPESAPAVVSNGDAIENNGTETLSTTNDQKDQVTDKAANLMGETSDVAEKIKSIPNVVNEMSDNNGVHQNGTSANGEELETENESKSQVEVIFQTDKAALTDELVTLNTAT…	79.82	5e-71	gi|312285488|gb|ADQ64434.1|	hypothetical protein [Bactrocera oleae]	-	-	-	-	79.82	2e-70
22	Unigene7243_17	GF10302 [Drosophila ananassae]	10758.994127	0.514	3	31	-	0.94	1.004|0.869	0.009	31|30	0.966|0.032	0.64	0.705|0.581	0.008	31|31	0.001|0.001	1.06	0.980|1.134	0.012	31|31	0.888|0.176	0.89	0.789|0.995	0.021	29|30	0.001|0.955	0.72	0.763|0.685	0.003	31|31	0.001|0.000	0.68	0.702|0.648	0.001	31|30	0.001|0.001	Unigene7243_17	IVLCSFIACAVAKPGLLAPLAAPLVAAPLAAAAINAPLDAAYASSRLDIQQRYGAALLATAPSKLIVSAPVAAPLAAGPAKILASAPLVAAPLAYTNLPLDAAYASSRL	-	-	-	-	-	-	-	-	-	-
23	CL875.Contig1_17	119 1039 cysteine-type peptidase [Glossina morsitans morsitans]	35187.972858	0.274	5	19	-	0.96	0.937|0.977	0.001	18|19	0.389|0.824	0.99	1.054|0.930	0.008	19|18	0.287|0.091	1.21	1.219|1.210	0.000	18|19	0.001|0.001	0.79	0.802|0.769	0.001	17|19	0.001|0.001	1.26	1.165|1.350	0.017	19|19	0.016|0.000	1.02	1.076|0.960	0.007	19|19	0.350|0.541	CL875.Contig1_17	SNNESEMSEALSGIVIDDLHSRHRRERKDLQAKIQALKKTAPKNDKKKRKEVMEEVARMESDLEKRQTIELVEIEKEQQTQQQNEGCQHKNSNEKRQNIDEILYNGDDEDDASGTTQRVTKAQKRRDKKTREARQREEDIRAAAEDAKFSLKTIEGRAIQSKLLERQLALHSIPSDGDCLYNAVRHQLSQKGLVTYSVQELRKETANYIHAHKDSLICYMTNPKTGDLLTDAEFEKYCKLLHSTPAWGGQIELKALSSILKVPIEVLQAEGPPTVQGASDFAGPNLLITYHRHLYSLGEHYNSTVPI	55.21	8e-82	gi|195162718|ref|XP_002022201.1|	GL25638 [Drosophila persimilis]	40.89	1e-56	sp|Q7ZV00|OTU6B_DANRE	OTU domain-containing protein 6B OS=Danio rerio GN=otud6b PE=2 SV=1	55.21	3e-81
24	CL1577.Contig1_17	GK16653 [Drosophila willistoni]	9823.01750200001	0.558	4	28	-	0.97	0.998|0.943	0.002	28|27	0.983|0.097	0.92	0.862|0.975	0.006	25|28	0.001|0.731	0.73	0.770|0.685	0.004	28|28	0.001|0.001	1.31	1.313|1.298	0.000	26|27	0.001|0.001	0.72	0.723|0.723	0.000	28|28	0.000|0.000	1	0.969|1.038	0.002	26|28	0.773|0.632	CL1577.Contig1_17	MSLDEKFNAAAEKAKTFTKRPTDEELLELYALFKQATVGDNNTSKPGMLDLKGKAKWEWWNKQKGKAQDVAKQEYIDFVEKLAASY	75.58	2e-31	gi|195428773|ref|XP_002062440.1|	GK16653 [Drosophila willistoni]	71.43	4e-30	sp|P42281|ACBP_DROME	Acyl-CoA-binding protein homolog OS=Drosophila melanogaster GN=Dbi PE=2 SV=1	75.58	1e-30
25	Unigene14727_17	174 599 large serine protease [Glossina morsitans morsitans]	15917.60355	0.711	6	41	-	0.88	0.862|0.906	0.001	41|41	0.068|0.170	0.99	1.006|0.979	0.000	41|41	0.982|0.896	0.76	0.735|0.776	0.001	41|41	0.001|0.001	1.09	1.148|1.025	0.008	41|36	0.027|0.769	0.86	0.855|0.867	0.000	41|41	0.001|0.252	1.11	1.131|1.086	0.001	41|41	0.296|0.471	Unigene14727_17	MANKFAGLTVCLLSLWISSTQAQSTPNIDDLLNKIFTTEQTPFQPTPTKTTVLQPQPQPNPAPQPDPGSGKSCGVNKECVARFLCGEDGSVIRDGQTLIDIRFDGDEVCTYLEVCCNTDDRLTEPSVPIKPDETHEGCGYRN	53.33	2e-15	gi|371536093|gb|AEX33291.1|	putative salivary trypsin [Lucilia sericata]	-	-	-	-	52.00	4e-13
26	Unigene3254_17	GG16170 [Drosophila erecta]	8696.419735	0.165	1	3	-	0.75	0.683|0.808	0.008	3|3	0.279|0.321	0.91	0.831|0.982	0.011	3|3	0.572|0.966	0.67	0.634|0.706	0.003	3|3	0.046|0.109	1.11	1.154|1.064	0.004	3|3	0.485|0.873	0.82	0.861|0.773	0.004	3|3	0.496|0.285	1.19	1.161|1.209	0.001	3|3	0.587|0.418	Unigene3254_17	GIYRYAYSTSNGITVQAAGSALEAIGIFSYTSPEGTPIEVRYIADELGFHAVGRHLPQPPPIPDYILRSLEYIRTHPNE	79.75	1e-31	gi|194875454|ref|XP_001973601.1|	GG16170 [Drosophila erecta]	62.34	2e-21	sp|P27779|CUP7_DROME	Pupal cuticle protein Edg-78E OS=Drosophila melanogaster GN=Edg78E PE=1 SV=1	79.75	6e-31
27	Unigene14767_17	GK13792 [Drosophila willistoni]	22365.11739	0.174	3	30	-	0.93	0.928|0.923	0.000	30|27	0.118|0.003	0.88	0.851|0.914	0.002	29|29	0.001|0.017	1.16	1.220|1.104	0.007	27|28	0.001|0.015	0.84	0.846|0.831	0.000	28|28	0.001|0.001	1.07	1.104|1.036	0.002	29|29	0.012|0.556	0.98	0.905|1.047	0.010	29|30	0.015|0.408	Unigene14767_17	MAAANKLLFLSRSLSSTAQFVKPPVQVFGLEGRYATSLYSAATKLKQLDQVEKDLNALQVALKSNPSLRMAVTNPIINKKLMSNTLKATADKLKMAPATANLLGLLADNGRLKNLDMIINAYKTIMAAHRGEVVCEVVTAKPLDSSQSKQLESALRSFLKGNQQLKITSRVDPSIIGGLIVSIGDKYVDMSIASKIKLYTDVITSSA	79.33	2e-89	gi|195451167|ref|XP_002072797.1|	GK13792 [Drosophila willistoni]	77.03	3e-89	sp|Q24439|ATPO_DROME	ATP synthase subunit O, mitochondrial OS=Drosophila melanogaster GN=Oscp PE=2 SV=2	79.33	6e-89
28	Unigene15120_17	GL18520 [Drosophila persimilis]	12287.091275	0.243	2	3	-	1.1	1.021|1.175	0.012	3|3	0.964|0.637	1.09	0.985|1.198	0.023	3|3	0.982|0.522	1.06	1.069|1.056	0.000	3|3	0.823|0.847	1.04	1.132|0.945	0.017	3|3	0.764|0.785	1.05	1.063|1.030	0.001	3|3	0.847|0.950	0.97	0.951|0.993	0.001	3|3	0.896|0.987	Unigene15120_17	ILNASPEWATPVHKNALMQTKMKLPVEETEHDWVMQVVRNREGEGVPLKMGMELYAANKVGRLPFLNSSNMMRDVLLARDEMIDFSDILGHPDHFEFQNQPHATIEK	45.61	2e-20	gi|195117842|ref|XP_002003456.1|	GI17923 [Drosophila mojavensis]	40.45	5e-11	sp|Q5R9L9|POMP_PONAB	Proteasome maturation protein OS=Pongo abelii GN=POMP PE=2 SV=1	45.61	8e-20
29	Unigene17254_17	GK17018 [Drosophila willistoni]	99936.4221509994	0.008	1	1	-	0.78	0.845|0.713	0.009	1|1	0.844|0.587	0.85	1.063|0.642	0.089	1|1	0.947|0.557	1.02	0.703|1.328	0.195	1|1	0.660|0.688	0.86	0.473|1.254	0.305	1|1	0.185|0.643	1.09	1.258|0.925	0.055	1|1	0.761|0.934	1.08	1.173|0.986	0.017	1|1	0.833|0.991	Unigene17254_17	TTSPSLYNGNITCCRDVNCRLNALNEHFTAFVQQKHHHQCIQCTSVCSNASSSSCMSHAKSNRRSRSSTVTGLNRNNTTVTPTVPAIAAAALRDGSPDSGVGSDAAMAKVFHTATEAITSDDSTSSFLGQYLTVHLQLDLCTWILFVLAVCTRFYKLSVPRHVVFDEIHYGKYISLYLRNIFFFDQHPPLGKQLIAAVAYTAGGYDGNYTFPHIGAEYNKNVPIFWLRFIPAMCGSALAPIVYKLLMTAHLSRWSALLGGVLIILDNALLTQSRFILMESMLLFFEACGLYYMLRFQDSRFGSSLWLLFGLASATCFSFASSVKYAGFLTYGLTAYLSCRFLWDKLYDARLSNLHIILETIARIFLFTIIPLMLYVSIFYVHLQILYRAGPHDSIMTSA…	69.23	0.0	gi|195128771|ref|XP_002008835.1|	GI11591 [Drosophila mojavensis]	65.55	0.0	sp|Q9VTK2|POMT1_DROME	Protein O-mannosyltransferase 1 OS=Drosophila melanogaster GN=rt PE=2 SV=2	69.23	0.0
30	CL1061.Contig2_17	145 1287 minus strand lysophosphatidic acid acyltransferase [Glossina morsitans morsitans]	44085.239436	0.026	1	1	-	0.9	0.785|1.010	0.025	1|1	0.739|0.993	0.94	0.971|0.908	0.002	1|1	0.980|0.925	0.87	0.858|0.881	0.000	1|1	0.875|0.879	1.05	1.171|0.919	0.032	1|1	0.812|0.881	0.92	0.794|1.047	0.032	1|1	0.761|0.965	1.04	1.181|0.894	0.041	1|1	0.828|0.889	CL1061.Contig2_17	MTLLAEIKKLRLIHLCIAITFFISGLVINLVQLILHLTLKPFNVVLFRRIMYYLCYSLNSQLLFVAEWYSNSKLHVYIDADDLEKYGGKEHVLLIMNHSYEIDWLAGWMFTEKNGVLGNCKAYAKKAISYVPAIGWAWYFAEFVFLERSYDKDKEIIARQLKEVFAYPDPVWLLLNAEGTRFTPKKHEASVKFAQERGMTVLKHHLIPRTKGFTASLPTLRGRCPAIYDINLAFKKDSKHPPTISTILNGYPIEGYMFARRIPLENVPEDEAAAAEWLQNLFREKDRIIDSFHTTGSFFETSGFKEVPVKHFKYRPYDLLNFALWAIFSISLILYYLVSSFLAQNWIGLSIAVGILLAIYVLMVKSINMSKISKASSYGSE	71.92	9e-153	gi|195135657|ref|XP_002012249.1|	GI16871 [Drosophila mojavensis]	40.21	1e-75	sp|Q9NRZ7|PLCC_HUMAN	1-acyl-sn-glycerol-3-phosphate acyltransferase gamma OS=Homo sapiens GN=AGPAT3 PE=1 SV=1	74.80	2e-166
31	Unigene29865_17	GH21975 [Drosophila grimshawi]	28782.657367	0.032	1	1	-	1.01	1.037|0.974	0.002	1|1	0.968|0.981	1.19	1.235|1.135	0.005	1|1	0.749|0.904	1.25	1.344|1.165	0.016	1|1	0.710|0.855	0.82	0.831|0.799	0.001	1|1	0.789|0.643	1.42	1.311|1.531	0.024	1|1	0.707|0.520	1.17	1.182|1.149	0.001	1|1	0.826|0.860	Unigene29865_17	DGGEFNKFGNPFTAVIKTIVMLTGEFDAGDIEFDTVYSYLIFLMFVVFMSIVLFNLLNGLAVSDTQVIKAQAELNGSICRTLLLKRYEQVLTGRTGHASFIIKHEPFRTICRRLMNLDFNYIIGRQIAVLPNDHNKVLVGVANGDVGGAVKSEYNFARNNEVRNSESQFLPLSEETTNHQKKLLDAPVSFLPCCCTCITGKCSEMDSRTVKLAMAVIERKSTSQQSKMREANTESRLKNIEERLAQMTELLQK	56.92	2e-72	gi|195149449|ref|XP_002015670.1|	GL10901 [Drosophila persimilis]	56.05	6e-64	sp|Q9W0Y6|PAIN_DROME	Transient receptor potential cation channel protein painless OS=Drosophila melanogaster GN=pain PE=1 SV=1	56.92	5e-72
32	Unigene15489_17	SD13292p [Drosophila melanogaster]	18145.738716	0.365	2	4	-	1.18	1.107|1.246	0.010	4|4	0.573|0.273	0.82	0.788|0.850	0.002	4|4	0.309|0.441	1.2	1.210|1.185	0.000	4|4	0.268|0.531	0.97	1.013|0.917	0.005	3|4	0.967|0.490	0.83	0.812|0.849	0.001	4|4	0.299|0.589	0.7	0.718|0.672	0.001	4|4	0.029|0.068	Unigene15489_17	MQIFVKTLTGKTITLEVEPSDTIEHVKAKIQDKEGIPPDQQRLIFAGKQLEDGRTLADYNIQKESTLHLVLRLRGGAKKRKKKNYSTPKKIKHKRKKVKLAVLKYYKVDENGKIHRLRRECPGENCGAGVFMAAHEDRHYCGKCQLTFVFSKPEDK	97.44	2e-62	gi|17136574|ref|NP_476778.1|	ribosomal protein S27A [Drosophila melanogaster]	97.44	4e-63	sp|P15357|RS27A_DROME	Ubiquitin-40S ribosomal protein S27a OS=Drosophila melanogaster GN=RpS27A PE=1 SV=2	97.44	1e-61
33	Unigene15111_17	GE19352 [Drosophila yakuba]	47369.805305	0.227	7	13	-	0.79	0.753|0.829	0.003	12|11	0.001|0.001	0.81	0.801|0.817	0.000	13|10	0.003|0.005	0.98	0.945|1.020	0.003	12|13	0.451|0.868	0.83	0.845|0.819	0.000	12|9	0.011|0.001	0.93	0.886|0.965	0.003	12|12	0.005|0.690	0.95	1.004|0.896	0.006	13|13	0.981|0.216	Unigene15111_17	RRAESMFNLSDDTRRTQTQPQQTFSTYERPKSAAADDWARYASDFGSSENITRPFAREVEICYQRQRPRTIRAPRLSASTNDLSSYTHSYDNYNAYNAHRSHAPMLQSVAQHPRPHHGSCYSVLERDPNPTYISTTTRRGVSPAPVSPAPQAAAQEPLYSPHAPERQRRASLPREIQEQQLKYISSKEEELRMEFERLRNERRRLMEELNTPPAATLQMPQHPMRDIYRPVPKLPTLTEDEVFRQQMAEEWLSKVAEREERRLQKIIKISKVNETQQGQQPPVPPHPKTDISDEFLKRVQERRTKLAMPADSDWESGAESQPVKAEHASESDVEVPPVKVIEGKSEADLRQLPRHLREFARFSNRNEEKIDGGHRVVHEEEERRQEANDNSMSSALKKS…	58.78	3e-106	gi|195028636|ref|XP_001987182.1|	GH21778 [Drosophila grimshawi]	-	-	-	-	58.78	1e-105
34	CL3795.Contig1_17	GI24370 [Drosophila mojavensis]	44606.610739	0.269	5	21	-	0.92	0.902|0.947	0.001	21|21	0.260|0.659	0.84	0.814|0.875	0.002	19|20	0.001|0.006	0.99	1.006|0.978	0.000	20|20	0.969|0.839	0.9	0.888|0.903	0.000	18|20	0.060|0.244	0.95	1.003|0.891	0.006	17|18	0.981|0.067	0.95	0.956|0.943	0.000	21|21	0.805|0.641	CL3795.Contig1_17	YAKPQQSNADLDKTIKDIFSQNPSAPVQSTGTGFGKIVTPEPIDGTQPQIEFNSTSGKAPCNCVPYHMCDPNTGAETAPVEDGEFDGFGLIDLRFNDDDPVCEHFLDVCCGSQNQHRGSLTPKPQEERPNRPKGCGIRNVGGIDFNITGAVDNEAGFGEFPWTVALLHANNYSYFCGGSLIHPQVILTAVHCVVGRAESSFLVRAGEWDSQTTKERLPYQERAVQRIVTHPNFSSRNVANNFALVVLNQAFVLADHINVVCLPRQNAAPLANAQCFANGWGKDVFGEAGRFSAIMKRVPLPIVDFGTCQTRLRGTRLGPKFVLDRSFICAGGVRGIDTCQGDGGAPLVCPIGLTAENRYEQDGIVSWGIGCNDDVPAAYASVATARDWIDQQMLSLGYG…	65.27	5e-154	gi|195109220|ref|XP_001999185.1|	GI24370 [Drosophila mojavensis]	32.08	2e-29	sp|Q05319|STUB_DROME	Serine proteinase stubble OS=Drosophila melanogaster GN=Sb PE=2 SV=2	65.27	2e-153
35	CL3839.Contig1_17	GJ13780 [Drosophila virilis]	12985.402104	0.122	1	4	CL3026.Contig2_17;CL3839.Contig2_17;CL3026.Contig1_17	0.83	0.819|0.831	0.000	3|4	0.394|0.282	0.84	0.941|0.746	0.019	4|4	0.841|0.143	0.84	0.839|0.850	0.000	3|3	0.448|0.454	0.91	0.924|0.897	0.000	4|4	0.682|0.598	0.93	0.831|1.032	0.020	4|4	0.208|0.932	1	1.083|0.916	0.014	3|4	0.838|0.681	CL3839.Contig1_17	KSWIELSSAATMAGVKSPDRITPLPFAGGEEYLRLLREAQRESNQSSRVVSLASSRRDTPRDSPKSPPNSPNTELTPDEDLKNVYINYWSKDGGSHRDTDWLDEWNSRPDQQPPK	75.21	2e-35	gi|195378668|ref|XP_002048105.1|	GJ13780 [Drosophila virilis]	-	-	-	-	71.55	5e-37
36	Unigene15200_17	93 710 minus strand RecName: Full=Glutathione S-transferase 1-1_ AltName: Full=GST class-theta	23743.080911	0.155	2	15	-	1.2	1.242|1.167	0.003	15|15	0.001|0.026	1.64	1.753|1.525	0.026	14|14	0.001|0.001	1.58	1.634|1.529	0.006	12|15	0.001|0.001	0.74	0.731|0.746	0.000	14|12	0.001|0.003	1.83	1.878|1.788	0.004	15|15	0.000|0.000	1.28	1.331|1.224	0.006	15|15	0.001|0.004	Unigene15200_17	MDFYYLPGSAPCRSVLLTAKNLGIELNKKLLNLQAGEHLTPEFLKINPQHTIPTLVDNGFALWESRAIIVYLVEKYGKDDALFPKCPKKQAVVNQRLYFDMGTLYKSFSDYYYPQIFAKQPADPEMYKKIEAAFEFLNTFLEGNKYVAGDQLTVADLAILASVSTFDVANFNISKYTNVARWYENAKKLPGWEENWEGSSEFKKFF	84.06	5e-100	gi|1346214|sp|P42860.2|GSTT1_LUCCU	RecName: Full=Glutathione S-transferase 1-1; AltName: Full=GST class-theta	84.06	7e-101	sp|P42860|GSTT1_LUCCU	Glutathione S-transferase 1-1 OS=Lucilia cuprina GN=GST1 PE=1 SV=2	80.19	5e-98
37	Unigene328_17	353 421 minus strand hypothetical protein [Bactrocera oleae]	2839.36866	0.522	1	11	-	0.8	0.802|0.800	0.000	10|11	0.001|0.016	0.79	0.789|0.799	0.000	11|10	0.002|0.004	0.68	0.690|0.673	0.000	11|11	0.001|0.001	1.19	1.195|1.178	0.000	11|11	0.025|0.007	0.66	0.656|0.662	0.000	11|11	0.000|0.000	0.95	0.935|0.959	0.000	11|11	0.277|0.627	Unigene328_17	MVSQWQLINNNYKNMDGYKRVAW	100.00	2e-06	gi|312285504|gb|ADQ64442.1|	hypothetical protein [Bactrocera oleae]	-	-	-	-	-	-
38	CL1569.Contig2_17	GJ24520 [Drosophila virilis]	45370.036089	0.158	5	10	-	0.92	0.822|1.008	0.017	9|10	0.008|0.974	1.07	1.076|1.065	0.000	9|10	0.420|0.600	0.78	0.731|0.830	0.005	10|10	0.030|0.340	1.2	1.236|1.159	0.003	10|10	0.156|0.306	1.02	1.005|1.030	0.000	8|7	0.971|0.883	1.15	1.202|1.088	0.006	9|7	0.008|0.344	CL1569.Contig2_17	NYGACQTPNGETGECMLIQKCTELYNMAVKSSLEEADVTFLRQSRCGSLGRSILVCCPNILDITEKDCETPNGKKGRCTFVLECGSLLPLVKDDLSASERNFLTKSVCGQGSRQVCCPDPPTNNRGELPLPPNCGKVSLTGRIFGGTATDIDEFPWTALLIYTKGNGGVGLHCGASLINDRYVLTAGHCVSKRVLPANWRLTGGRLGEWDLGTQQDCQFDSKGNKLCSSPHIDLNIEEEICHPLYNVRTQTYDIALLRLQEKVNFDAFTSPICLPITTSSAASNYEGVTMDIAGWGATETSNSSQKKLKALVRGENLDRCKAKYRTYTRIELGSSQMCAGGEKSVDTCRGDSGGPLMFAQSNNGREAYFLVGVVSFGPTPCGQEGFPGVYTRVDAFVSW…	88.06	2e-139	gi|312285682|gb|ADQ64531.1|	hypothetical protein [Bactrocera oleae]	42.51	2e-91	sp|P13582|EAST_DROME	Serine protease easter OS=Drosophila melanogaster GN=ea PE=1 SV=3	88.06	5e-139
39	Unigene15202_17	GA18708 [Drosophila pseudoobscura pseudoobscura]	142443.894577999	0.049	5	6	-	1.23	1.276|1.187	0.004	6|5	0.033|0.173	1.21	1.179|1.244	0.002	6|4	0.226|0.292	1.62	1.742|1.498	0.030	6|6	0.011|0.029	0.81	0.865|0.759	0.006	6|6	0.359|0.028	1.41	1.285|1.527	0.029	6|6	0.232|0.026	0.91	0.958|0.857	0.005	6|6	0.863|0.441	Unigene15202_17	MEESNVETVEQSITINQQEQAQLEQPSSPTSVATPTSTNSGNTSNATPTFSYDDLFPALPANTTAPLSSNAAPPCVRVTTTQKTQVLHVTGEERKTTESDKFGEGESRRICQQISKDTGAQIEIASGKNQSLTFLIKGKQSEILDARRRILMHFSTQASKQVSIPKEHHRVILGKRGERLRELERVTATRINIPSQTEESDIITILGTKEGIEKAEQEIRQLSAEQYKKCSDRTSVPKVYHPFIVGPNNENLTKLMEETGAKINVPPQSVQKDEIVISGEKDAVANAKLKVEAIYKEMEKKCSTVSVEVAKSQHRYVIGPKGSTLADILRITGVSVEMPPTDSPLETITLRGPQVALGNALTVVYQKANSVKSVEIEAPNWTHKYVIGRKGANMRQLEE…	79.82	0.0	gi|194753818|ref|XP_001959202.1|	GF12176 [Drosophila ananassae]	48.28	0.0	sp|Q00341|VIGLN_HUMAN	Vigilin OS=Homo sapiens GN=HDLBP PE=1 SV=2	79.82	0.0
40	Unigene24357_17	16 303 cytochrome c oxidase subunit Va COX6 [Glossina morsitans morsitans]	11364.681992	0.094	1	11	-	1.41	1.353|1.461	0.006	11|9	0.001|0.001	0.65	0.698|0.608	0.004	11|11	0.001|0.001	1.9	1.771|2.037	0.035	11|10	0.001|0.001	0.73	0.691|0.776	0.004	11|10	0.001|0.001	0.89	0.873|0.903	0.000	10|11	0.006|0.074	0.48	0.522|0.444	0.003	11|11	0.001|0.001	Unigene24357_17	MLRYVSFGFVKTLRSSHGLPTLVISRNCMHMHEEEPEHIFTKRFEDFFNRCEIDGWDLRQGMNDILGSDVVPDPKVIEAALRACRRVNDIALAIRW	53.61	2e-22	gi|195111442|ref|XP_002000288.1|	GI10146 [Drosophila mojavensis]	54.64	5e-23	sp|Q94514|COX5A_DROME	Cytochrome c oxidase subunit 5A, mitochondrial OS=Drosophila melanogaster GN=CoVa PE=1 SV=2	53.61	7e-22
41	Unigene17286_17	GJ21527 [Drosophila virilis]	21030.754851	0.099	2	11	-	0.73	0.757|0.710	0.001	11|10	0.010|0.001	0.57	0.623|0.520	0.005	9|10	0.001|0.001	0.89	0.933|0.853	0.003	10|9	0.292|0.013	0.87	0.880|0.855	0.000	10|11	0.011|0.072	0.69	0.683|0.703	0.000	11|11	0.001|0.001	0.78	0.781|0.778	0.000	11|11	0.093|0.017	Unigene17286_17	LESSVEFMKIWREYDTDNSGYIEADELKNFLRDLLKEAKKINDVSEDKLIEYTDTMLQVFDANKDGRLQLSEMAKLLPVKENFLCRQVFKGAAKLTKEDIEKVFSLYDRDNSGSIENEELKGFLKDLLELVKKDDYDAQDLKAFEETILRGVGYDKDGKISRKELTMILLTLAKMPPEDEQ	95.58	2e-84	gi|195381175|ref|XP_002049330.1|	GJ21527 [Drosophila virilis]	94.48	7e-84	sp|P41044|CAB32_DROME	Calbindin-32 OS=Drosophila melanogaster GN=Cbp53E PE=2 SV=1	95.58	5e-84
42	Unigene17595_17	GD13190 [Drosophila simulans]	43248.767911	0.015	1	1	-	0.73	0.789|0.666	0.008	1|1	0.737|0.488	0.82	0.780|0.866	0.004	1|1	0.699|0.877	0.63	0.712|0.540	0.015	1|1	0.649|0.320	1.17	1.238|1.094	0.010	1|1	0.708|0.873	0.71	0.709|0.705	0.000	1|1	0.602|0.608	1.13	0.963|1.298	0.056	1|1	0.963|0.699	Unigene17595_17	VRNLNLLECNSKELLQKYGVAIQEFKVLENSPNDAQIINQFDCPEYVVKAQILAGGRGKGVFENGFKGGVHLTKKKDEVLSLTNQMIGHRLITKQTPKSGILVKKVMIARSVNITHETYLSIVLDREHNGPVLIASPAGGMDIEAVAEKTPEKIKTVPLDLDKPIPQNTLIEIAKFLEFKGQCVERAAVEIQKLFDLFKAVDATQIEINPLAETDTNEVIAVDAKLNFDDNAEYRQKDIFAMHTAEEDTDPREVEAAKNNLNYVAMDGNIGCLVNGAGLAMATMDIIKLNGGEPANFLDVGGGVKENQVLKAFQIVTSDPKVKAILVNVFGGIVNCATIANGVVAASKTLNLRVPLIVRLEGTNADQARKILKDSGLAIQTAVDLDDAAHKAVAALH	82.12	0.0	gi|195587980|ref|XP_002083739.1|	GD13190 [Drosophila simulans]	60.71	1e-133	sp|P53589|SUCB2_CAEEL	Probable succinyl-CoA ligase [GDP-forming] subunit beta, mitochondrial OS=Caenorhabditis elegans GN=C50F7.4 PE=2 SV=1	82.12	0.0
43	Unigene6495_17	GF11643 [Drosophila ananassae]	28553.467144	0.068	1	1	-	1.96	2.293|1.622	0.225	1|1	0.179|0.399	1.48	1.206|1.753	0.150	1|1	0.785|0.432	1.86	2.126|1.597	0.140	1|1	0.251|0.457	1.08	1.057|1.095	0.001	1|1	0.944|0.873	1.35	1.573|1.131	0.098	1|1	0.458|0.892	0.8	0.610|0.995	0.074	1|1	0.388|0.995	Unigene6495_17	MSSGFVTESEAEEARKRRQEEWEKVRTPDQPLERPEEPYDGRSLFDRLKEQKMKKDLEYEEAHKLKNLIRGLDDDEVQFLELVDQNKIDAEKKQIQEERKELQEFRDRVATLQEETADKKLQSEIKTGKVSKISTTASTVRPSQKSLLGLGIKRKNGETASSSSSISAKITKDCTTTANATKLNTLPHINTDQFNKGQLKCVAILPGIGPYTESSDSEISSGSEDEPDNYNNAKYDLMGRKKQKKKNCQD	59.60	1e-57	gi|195380832|ref|XP_002049165.1|	GJ21431 [Drosophila virilis]	57.38	4e-12	sp|Q91WE2|F192A_MOUSE	Protein FAM192A OS=Mus musculus GN=Fam192a PE=2 SV=1	59.60	3e-57
44	Unigene15786_17	GI19134 [Drosophila mojavensis]	18885.541954	0.464	5	15	-	1.06	0.991|1.128	0.009	15|15	0.974|0.367	1.12	1.099|1.131	0.001	15|15	0.238|0.124	0.99	0.769|1.215	0.099	12|15	0.001|0.073	0.98	0.934|1.029	0.005	15|15	0.365|0.901	1.15	1.224|1.076	0.011	14|15	0.002|0.769	1.04	1.095|0.979	0.007	15|15	0.547|0.874	Unigene15786_17	MTNIRKAASSLQKLFVCGALKYGQPGHSILANSGNGYAKFWCRATTTEKLPLVIATRYNIPFLLNKPGVGSYVLGEIYEVDDKMLTSLDNLEDCQDIFTREVHDMNIGVGEGTVPCWVYLLQKYPEKLLSLQYLSSYENSAAHPYVIRNRRTHKHPPQEDLAYTAA	81.93	2e-79	gi|195121652|ref|XP_002005334.1|	GI19134 [Drosophila mojavensis]	79.39	2e-77	sp|Q9W0Y1|TINA1_DROME	Troponin C-akin-1 protein OS=Drosophila melanogaster GN=Tina-1 PE=2 SV=1	81.93	6e-79
45	CL1008.Contig1_17	GA14053 [Drosophila pseudoobscura pseudoobscura]	57309.662211	0.068	3	8	-	0.93	0.912|0.957	0.001	8|8	0.424|0.707	0.83	0.880|0.784	0.005	8|8	0.122|0.010	1.34	1.257|1.413	0.012	8|8	0.093|0.004	0.7	0.673|0.723	0.001	8|8	0.001|0.001	1.18	1.166|1.191	0.000	8|8	0.133|0.135	0.88	0.946|0.817	0.008	8|8	0.649|0.011	CL1008.Contig1_17	DKSPSSPATKLLINHGKPNYTIQRSPKAQQNGGTNPLNNELQSDNRNNYYPYKSAGVKGTTGIFINGSSIKTNGTSNNNNNSSNSSQNGDELIIHSTKFNGVFKPINIQKLESNNEADSPVVLRRVPKPEQTPAAAENGNDENVPEFILRQRRIQERLAKENILDFENRRSGYFTHVVISPTSPNRTSLVETMSSPPIVPSLEIPPPAKEVREETIAEEHNAEVSAANDEEQAEEENVAVATNRQVEEEEVAKAIEEVNKAVAGEVDDEKPEEVVAEPPAAIEVEVQEEVQEQVVVEHKVEEQKSVEQEATKVEVVQGEEPKVEAAQTPIVSVVVTSAPLVEADEPKDSQPSLEETVKPTADLVGESQEVAEIAEHVEAVTVTSNLVKVPKENGSGEAA…	51.98	4e-41	gi|195124485|ref|XP_002006723.1|	GI21223 [Drosophila mojavensis]	-	-	-	-	51.98	1e-40
46	Unigene15929_17	GI16168 [Drosophila mojavensis]	20028.667454	0.523	7	71	-	0.97	0.990|0.949	0.001	70|68	0.939|0.393	1.26	1.234|1.290	0.002	66|69	0.001|0.001	1.02	1.058|0.978	0.003	71|68	0.454|0.757	0.94	0.943|0.943	0.000	70|71	0.063|0.024	1.34	1.376|1.302	0.003	71|68	0.000|0.000	1.31	1.261|1.368	0.006	70|70	0.001|0.001	Unigene15929_17	MSSRKTAGRRATTKKRAQRATSNVFAMFDQAQIAEFKEAFNMIDQNRDGFVEKEDLHDMLASLGKNPTDEYLEAMMNEAPGPINFTMFLTLFGERLQGTDPEDVIKNAFGCFDEENNGVLPEDRLRELLTTMGDRFTDEDVDEMYREAPIKHGLFDYIEFTRILKHGAKDKDEQ	97.70	5e-83	gi|195133442|ref|XP_002011148.1|	GI16168 [Drosophila mojavensis]	96.55	6e-83	sp|P40423|SQH_DROME	Myosin regulatory light chain sqh OS=Drosophila melanogaster GN=sqh PE=1 SV=1	97.70	1e-82
47	Unigene9707_17	GM18559 [Drosophila sechellia]	18745.404551	0.252	1	1	-	0.74	0.841|0.636	0.021	1|1	0.832|0.433	0.79	0.989|0.588	0.080	1|1	0.992|0.468	0.73	0.772|0.693	0.003	1|1	0.757|0.576	1.01	0.897|1.115	0.024	1|1	0.888|0.852	0.81	0.705|0.912	0.021	1|1	0.594|0.922	1.07	1.121|1.028	0.004	1|1	0.879|0.980	Unigene9707_17	EVKVGVLFFRNEYEIELSFDEAFREINNNKLFGLSFQLIKRFVASDDSFILQQLTCELISDGVVAIFGPSSKTSTDIVAVIANATGIPHMEFDWRIECPTQDRRNNRMTVNVAPSVSMISKAYYSIINSNYEWDQFTLIYETQTGLARLQDLMNIKPLDSEQI	62.58	3e-57	gi|195116402|ref|XP_002002744.1|	GI17553 [Drosophila mojavensis]	34.51	2e-13	sp|P22756|GRIK1_RAT	Glutamate receptor, ionotropic kainate 1 OS=Rattus norvegicus GN=Grik1 PE=1 SV=3	62.58	1e-56
48	CL1394.Contig1_17	GE15781 [Drosophila yakuba]	52181.2270110001	0.142	6	8	-	1.79	1.824|1.765	0.002	7|6	0.001|0.001	1.42	1.332|1.508	0.015	6|7	0.010|0.001	2.41	2.561|2.253	0.047	8|7	0.001|0.001	0.8	0.801|0.797	0.000	7|7	0.144|0.070	1.82	1.881|1.768	0.006	8|6	0.006|0.000	0.82	0.809|0.822	0.000	7|6	0.026|0.070	CL1394.Contig1_17	NAITPQKLDKWRKDFYSEPKNILAQNVCSRVDPFDVCLSRKSLENTNHVFTYKVESEGKPITNQKSSGRCWLFASLNCIRLPFMKSLNIDEFEFSQGYLFYWDKIERCNYFLNNIVKTARRNEVVDGRLVSFLLNDPTSDGGQWDMLVNLITKHGLMPKKCFPETYSCEASMRMNAILKSKLREYAKVLRDLLAIDPTEEVVSQKIDEMMASIYKIVGICLGIPSERFTWEYYDKSKAYNSIGPVTPLEFYQNYVKNVFNVENKVCLVNDPRPSSFYDQTYTVDCLGNVVGGRPVLYNNQPVEKLLQLVAESLKAGEAVWFGCEVSKRFASKQGIEDLNVHDFKLVFDVDIQTPLSKADRLIFGESAMTHAMLFTAVSLDENGEVKKLRVENSWGEDRG…	81.56	0.0	gi|195480131|ref|XP_002101148.1|	GE15781 [Drosophila yakuba]	57.08	2e-156	sp|Q13867|BLMH_HUMAN	Bleomycin hydrolase OS=Homo sapiens GN=BLMH PE=1 SV=1	81.56	0.0
49	CL2825.Contig2_17	GH15385 [Drosophila grimshawi]	23231.673999	0.079	1	2	CL2825.Contig1_17	0.98	0.973|0.986	0.000	2|2	0.966|0.988	0.87	0.871|0.874	0.000	2|2	0.798|0.837	1.01	0.965|1.063	0.005	2|2	0.962|0.914	0.97	0.932|1.001	0.002	2|2	0.885|0.997	0.9	0.944|0.861	0.003	2|2	0.932|0.804	0.88	0.886|0.878	0.000	2|2	0.841|0.791	CL2825.Contig2_17	TWYPRMLRVAALNEPYVGDLQGIRGADFACYRQGRRAGLLGTFKAFLSSRVQNLDSIVRVADRDLPVVNTRGDVLFNSWKGIFNGQGGFFSQAPRIYSFSGKNVLTEPLWPQKHVWHGSLPNGERSIDTYCDAWHSSSIDKFGYASNLLGNKLLDQERQTCDSKLIVLCVEALSQDRRRKRDLSDSEPEFHTAEAYAHHLQEL	84.83	1e-103	gi|195012981|ref|XP_001983783.1|	GH15385 [Drosophila grimshawi]	49.71	1e-46	sp|P39059|COFA1_HUMAN	Collagen alpha-1(XV) chain OS=Homo sapiens GN=COL15A1 PE=1 SV=2	84.83	4e-103
50	CL3421.Contig2_17	121 1680 minus strand clathrin adaptor complex medium subunit [Glossina morsitans morsitans]	58270.8050170001	0.044	2	5	-	1.13	0.996|1.257	0.034	5|5	0.980|0.075	1.16	1.079|1.243	0.013	5|5	0.803|0.155	1.2	1.064|1.338	0.038	5|5	0.681|0.157	0.91	0.942|0.885	0.002	5|4	0.833|0.303	1.21	1.275|1.140	0.009	5|5	0.344|0.413	1.01	1.073|0.949	0.008	5|5	0.846|0.847	CL3421.Contig2_17	MVLIAAAVCTKNGKVIISRQFVEMTKARIEGLLAAFPKLMTSGKQHTYVETESVRYVYQPMEKLYMLLITTKASNILEDLETLRLFSKVIPEYCHSLDEKEILENAFNLIFAFDEIVALGYRESVNLKQIKTFIEMDSHEEKVYQAVRQTQEREAHQKMREKAKELQRQRLEAAKRGVGSSLIGRGGHGSSSSGMDAFGISSNSISSAPSIESDLKPAVTKTQKSVARNALKLGGKTKDVDSFVDQLKSEGEKISALTPVNSQSSVAVAKTKIASDVHTESVHLKMEDKLTVRLGRDGGLQQFELSGLLTLRISDENFGRIKVQLHNNDTHGIQLQTHPNVDKELFKTRSMIGLKNPAKPFPLNTDVGVLKWRFITQDESAIPLTINCWPSENGEGGCD…	78.40	0.0	gi|195134406|ref|XP_002011628.1|	GI10991 [Drosophila mojavensis]	59.39	1e-167	sp|P53619|COPD_BOVIN	Coatomer subunit delta OS=Bos taurus GN=ARCN1 PE=1 SV=1	80.65	0.0
51	Unigene15445_17	GG24885 [Drosophila erecta]	14350.255743	0.367	3	23	-	0.8	0.813|0.789	0.000	23|22	0.001|0.001	0.8	0.803|0.789	0.000	23|23	0.001|0.001	0.71	0.676|0.743	0.002	23|22	0.001|0.001	1.13	1.103|1.158	0.002	21|22	0.002|0.010	0.71	0.753|0.670	0.003	23|23	0.000|0.000	0.98	0.964|0.986	0.000	23|22	0.798|0.896	Unigene15445_17	AKMSNEVEKAQTASAAEDTIFGKILRQEIPCNFIHEDEKCVAFHDINAQAPTHFLVIPRKPIVQLSQANEDDCELLGHLMLVGAKVAKDLGLDKGYRVVINNGQHGAQSVYHLHLHFIGGRQMQWPPG	82.03	8e-60	gi|194855024|ref|XP_001968464.1|	GG24885 [Drosophila erecta]	65.08	7e-46	sp|P62958|HINT1_BOVIN	Histidine triad nucleotide-binding protein 1 OS=Bos taurus GN=HINT1 PE=1 SV=2	82.03	4e-59
52	Unigene35569_17	GF16342 [Drosophila ananassae]	74594.5801979999	0.008	1	1	-	n/a	-|-	-	-|-	-|-	n/a	-|-	-	-|-	-|-	0.21	0.100|0.323	0.025	1|1	0.044|0.082	6.87	9.456|4.288	13.354	1|1	0.035|0.041	0.51	0.558|0.469	0.004	1|1	0.331|0.256	n/a	-|-	-	-|-	-|-	Unigene35569_17	SKDDIGIAHDLRDHQIREKSAEPHPVSRSGNETPPEGFRSRSNTIGGTSPSKPSAEHLKSPMMDIFIKVGNSPKESEAHKASWRHAILNSVVTPSKGMDGDAQSEFMSPMRITKRIRGKRSREELRDLWKTAIRQTILLNRMETENAMLQARQNENELKRIKLDYEEIVPCDKQLIERWEQIIERDSMKIGNKKDPKVLAQAIKCGVPRSKRGDVWTFLADQHSMNTAPVDTKKFPNFNTPYHTLLKNLTEHQHAIFIDLGRTFPNHKFYKDPLGVGQLSLFNLLKAYSILDPELGYCQGLGFICGILLLHCDEADAFQLLKHLMFRRQMRTKYLPDMKKFQLQLYQLSRLVKDHLPELYIWLDQNDVSPTLYAAPWILTVFSSQFPLGFVARVFDLLF…	83.65	0.0	gi|194745496|ref|XP_001955224.1|	GF16342 [Drosophila ananassae]	44.75	3e-111	sp|O97790|TBCD1_BOVIN	TBC1 domain family member 1 OS=Bos taurus GN=TBC1D1 PE=2 SV=2	83.65	0.0
53	Unigene32079_17	GH13284 [Drosophila grimshawi]	71675.5246290001	0.021	1	1	-	1.11	1.199|1.014	0.017	1|1	0.816|0.992	1.33	1.220|1.431	0.022	1|1	0.771|0.633	0.92	0.957|0.879	0.003	1|1	0.967|0.877	1.22	1.186|1.253	0.002	1|1	0.800|0.642	1.1	1.189|1.005	0.017	1|1	0.827|0.996	1.21	1.042|1.369	0.053	1|1	0.958|0.641	Unigene32079_17	RRAVLNLTKNTLQSSLKTGLPSVSVAVQQNVPDKRFYSISEGPQKQNLLRYPAFPLKDTLEKFLKTVEPLLNACDLVETKEAVKKFETGDGPELQALLEKAAKCEQNWLSRRWLQSAYLQYRDPVTVYVSPGMSFPQQKFENDDAFLDYVVKVIYSLARYKQIIDAGQIPIVKMGQYELDNSQFSKVYGTCRIPQKGEDKLEYHPKSTHVVVLYKNHFYKLPIYNNKGVVLHTDVLLAQIKKIIATEKEKGIEFGLLTTDNRDNWAQAYEELIKIDGNKEHVKTIQSALFTVSLDECVEVKDDEFFNELSGQLIHGGGSHVNSANRWMDKTIQLILNRNGMSGFCYEHSPAEGQPIANITDYVSKNLLNNKHYEGSARDDYPCAAKLPLKSNNTLNRYI…	53.34	0.0	gi|195051389|ref|XP_001993085.1|	GH13284 [Drosophila grimshawi]	40.00	2e-124	sp|Q704S8|CACP_RAT	Carnitine O-acetyltransferase OS=Rattus norvegicus GN=Crat PE=1 SV=1	53.34	0.0
54	Unigene14925_17	GI10844 [Drosophila mojavensis]	87441.071036	0.078	5	26	-	1.19	1.187|1.185	0.000	26|25	0.001|0.001	1.27	1.201|1.329	0.008	26|26	0.001|0.001	1.32	1.338|1.294	0.001	26|25	0.001|0.001	0.93	0.955|0.902	0.001	26|25	0.409|0.002	1.34	1.374|1.309	0.002	26|25	0.000|0.000	0.99	0.997|0.973	0.000	25|22	0.970|0.686	Unigene14925_17	AAKMAVISSILAVLILLPGAPAFRTQSTLIQPPPQSDKFAPSRNVMHRAFANAGRAPGLEIWRIENFEPVVYPKNNYGKFYTGDSFIVLNTIERKDKKLSWDIHFWLGSETSTDEAGAAAIYAVQLDDLLNGAPVQHREVQDHESQLFLSYFRNGVRYEQGGVGTGFKHVQTNAAGEKRLFQVKGKRNVRVRQVNLSVSSMNKGDCFILDGGNEILVYVGPQARRVEKLKAISAANQIRDQDHNGRARVEITDEFSSEVDKQHFFEVLGSGAPNQVPDEAAEQEDGAFETADANSVTLYKVTDARGGLKIDPISVKPLRQEMLDTNDCFILDTGSGIYVWVGRRSTPKEKADALSKAQEFLSTKKYPAWTQVHRVVEGAESAPFKQYFATWRDAGMAHT…	70.59	0.0	gi|195113939|ref|XP_002001525.1|	GI10844 [Drosophila mojavensis]	66.41	0.0	sp|Q07171|GELS_DROME	Gelsolin OS=Drosophila melanogaster GN=Gel PE=1 SV=2	70.59	0.0
55	Unigene15205_17	GH14704 [Drosophila grimshawi]	46096.357627	0.261	9	39	-	0.88	0.846|0.904	0.002	38|39	0.007|0.150	1.04	1.061|1.009	0.001	39|35	0.134|0.907	1	0.961|1.029	0.002	39|39	0.812|0.863	0.9	0.901|0.890	0.000	39|39	0.152|0.025	1.14	1.107|1.173	0.002	37|39	0.113|0.013	1.15	1.161|1.134	0.000	33|39	0.001|0.065	Unigene15205_17	MAFLIKLTNTTLRQLASRSYGALSHVTSTGPSFGITEDQKQMQELTRKFVREEIIPVAAHHDKTGEYPWDIIKKAWSLGLMNNHIPADIGGMDIDCYTSCLIAEELAYGCTGIMTALEASGLGQTPVIISGNKEQKKKYLGRLLEQPIVAAYAVTEPGAGSDVNGIRTKAERKGDEYILNGQKMWITNGGVANWYFVLARTNPDPKAPASKAFTGFIVDRDTPGLTPGRKEQNMGQRASDTRGITFEDVRVPKENVLVGEGAGFKIAMGTFDKTRPPVAAGAVGLAQRCLDEALKYSMERKAFGVPIAYHQAVQFMLADMAIGVETSRLAYRLSAWEVDQGRRNSYYASIAKCHAADMANKIASDAVQIFGGNGFNTEYPVEKLMRDAKIYQIYEGTSQ…	86.84	0.0	gi|195019873|ref|XP_001985073.1|	GH14704 [Drosophila grimshawi]	85.68	0.0	sp|Q9VSA3|ACADM_DROME	Probable medium-chain specific acyl-CoA dehydrogenase, mitochondrial OS=Drosophila melanogaster GN=CG12262 PE=1 SV=1	86.84	0.0
56	Unigene15311_17	GL18386 [Drosophila persimilis]	30501.949491	0.194	3	4	-	1.53	1.608|1.455	0.012	3|4	0.043|0.060	1.09	1.133|1.053	0.003	4|4	0.695|0.874	1.55	1.735|1.362	0.070	3|3	0.022|0.150	0.94	0.964|0.912	0.001	4|4	0.935|0.453	1.29	1.336|1.234	0.005	3|4	0.174|0.464	0.84	0.822|0.851	0.000	4|3	0.630|0.502	Unigene15311_17	MAVGKNKGLSKGGKKGGKKKVVDPFSRKDWYDVKAPNMFVTRQIGKTLVNRTQGQRIASDYLKGRVFEVSLADLQNDNDSDRSFRKFRLIAEDVQDRNVLCNFHGMDLTTDKYRSMVKKWQTLIEAIVEAKTTDGYMLRVFCIGFTAKDQQSQRKTCYAQQSQVRNIRSKMTEIITNDVTGSDLKQLVNKLALDSIAKDIEKKCQRIYPLHDVYIRKVKVLKKPRFDLSKLLELHGDGGGKGTDAVVSAEGAVVERPEGYEPPVQESV	91.94	1e-133	gi|126002490|ref|XP_001352361.1|	GA15280 [Drosophila pseudoobscura pseudoobscura]	91.94	1e-134	sp|Q29CU2|RS3A_DROPS	40S ribosomal protein S3a OS=Drosophila pseudoobscura pseudoobscura GN=RpS3A PE=3 SV=1	90.73	3e-132
57	CL2422.Contig2_17	GJ18883 [Drosophila virilis]	72193.0552800001	0.024	1	1	CL2422.Contig1_17	0.9	1.327|0.470	0.367	1|1	0.732|0.187	0.77	1.170|0.370	0.320	1|1	0.818|0.194	0.63	0.739|0.517	0.025	1|1	0.718|0.282	1.31	0.820|1.794	0.474	1|1	0.786|0.164	0.7	0.587|0.813	0.026	1|1	0.374|0.791	1.12	1.041|1.208	0.014	1|1	0.961|0.832	CL2422.Contig2_17	EIDNTTWHEVKMKIREVQSEQHMCIDKEQLTELDIYHRILRFKNYMVALMNKNLLPVKFNLPLFGECVTLSRGLLFNIYFILFRGPGSPFQNNWQLRDDFNFRTNQVELAQRLSKLIMWVALANLTLAPVIFVWQCLYFLFSYANILRKEPGTLGMRTWSNYGRLYLRHFNELEHELDARLNRAYEYADRYLSSFSSPSMAVVARNILFISGGILVLILTLGIYDEFVFQVEHVLTIITILSVIGLICRTMIPDENLIWCPEQLMTAILAHVHYLPSNWKNRAHTAAVRKEFENLFQFKAGYLLNEIVSPLVTPFILMFVFRPKSLELVKFFRSFTVSVKGVGNVCSFAQMDVRKHGNPDWQLPKPNTKQKGNVDAFDNTTKSAVDNGKTELSLIRFTL…	62.27	0.0	gi|195401731|ref|XP_002059465.1|	GJ18883 [Drosophila virilis]	50.12	1e-129	sp|Q5RCS0|ATG9A_PONAB	Autophagy-related protein 9A OS=Pongo abelii GN=ATG9A PE=2 SV=1	62.27	0.0
58	Unigene14404_17	ubiquitin protein ligase [Glossina morsitans morsitans]	18290.359243	0.314	4	8	-	0.99	0.997|0.975	0.000	8|8	0.983|0.895	0.91	0.840|0.979	0.010	7|8	0.054|0.948	0.93	0.936|0.930	0.000	8|7	0.620|0.374	1.09	1.119|1.056	0.002	8|8	0.565|0.552	0.85	0.885|0.815	0.002	8|8	0.062|0.015	0.9	0.865|0.932	0.002	8|7	0.061|0.462	Unigene14404_17	MSGIAITRLGEERKAWRKDHPFGFVARPAKNPDGTLNLMIWECAIPGKKGTAWEGGLYKLRMIFKDDYPTSPPKCKFEPPLFHPNVYPSGTVCLSLLDEEKDWRPAITIKQILLGIQDLLNEPNIKDPAQAEAYTIYCQNRLEYEKRVRAQARAMAATE	98.74	9e-89	gi|17136904|ref|NP_476978.1|	lesswright, isoform A [Drosophila melanogaster]	85.44	6e-80	sp|Q28CQ4|UBC9_XENTR	SUMO-conjugating enzyme UBC9 OS=Xenopus tropicalis GN=ube2i PE=2 SV=1	99.37	1e-88
59	Unigene29351_17	GF17576 [Drosophila ananassae]	46808.6598540001	0.019	1	1	-	0.88	0.897|0.863	0.001	1|1	0.897|0.857	0.82	0.845|0.800	0.001	1|1	0.806|0.786	1.03	1.101|0.958	0.010	1|1	0.926|0.955	0.86	0.901|0.812	0.004	1|1	0.881|0.673	0.96	0.896|1.022	0.008	1|1	0.908|0.983	0.93	0.926|0.924	0.000	1|1	0.919|0.920	Unigene29351_17	YSTVSNQPSRRRVVITGTGAISPLAHNVPEAWSRILAGESAISKLSDQFKGLPCQVAAQVQRDQLPTEKYFSKSDLKIMSTATQFAIIASEEALSSAKLQPKELTAEQRERFGVCVGMGMFDLTEVYGAWQQLQRGYNRVSPFFVPRLLPNMACGHISMRYGLRGPNHSVSTACATGAHAIGDALRFIRNGDADIILAGSGESCIDPLAIAGFCRLRALSTTHNDTPTTSSRPFDKKRDGFVMGEGAAILVLEELESARKRGAPILAELLGYGLSGDAYHITSPSEDGTGATLAMQRAITDARILPTDITYVNSHATSTPTGDRIEAHAVARVFGEHISQVRVSSTKGAHGHLLGASGNLETVFVVQACVDNKLPPSINIEHLDEDIKVPIVQNKSEQW…	75.12	0.0	gi|194741138|ref|XP_001953046.1|	GF17574 [Drosophila ananassae]	51.74	2e-112	sp|Q9D404|OXSM_MOUSE	3-oxoacyl-[acyl-carrier-protein] synthase, mitochondrial OS=Mus musculus GN=Oxsm PE=2 SV=1	75.12	0.0
60	Unigene6213_17	126 1049 minus strand dentin sialophosphoprotein precursor [Ateles geoffroyi]	34627.4979679999	0.045	1	1	-	1.15	1.087|1.217	0.008	1|1	0.921|0.793	1.26	0.972|1.554	0.169	1|1	0.982|0.522	1.12	1.459|0.778	0.232	1|1	0.607|0.731	1.17	1.597|0.740	0.367	1|1	0.328|0.487	1.13	0.979|1.289	0.048	1|1	0.985|0.729	1.06	0.885|1.242	0.064	1|1	0.865|0.748	Unigene6213_17	SKESYSKSILRUKQNNKKSAYRSTNGSSSSNQCDNMDKIKQWSCDKRWSNNKQISAVSFSDDDEGKEIAMETVEALLEAVVTEQADDNYSESDSRSTPTKTDKSSSDSGVCINMEEQSTINNTYVNPDIDDMNSSDVNSADKLNMSPNYSGNNLVRNSTFNEDDQKLETSLQRDNEKRTEKQTFSNIDVEHLWGRGNTNELPTWPIHTRRSARNYRHSTQDDGQDEEEEAEMEGGPVNATEEEQMPLLSESTTQSTIAEAVNNIDTSMPSEAENSPATSDGVNRLPYISSSPIFSDDDDDNDDNDDDN	-	-	-	-	-	-	-	-	-	-
61	Unigene1667_17	GF23253 [Drosophila ananassae]	33769.039414	0.034	1	1	-	1.31	1.552|1.076	0.113	1|1	0.493|0.933	1.22	1.112|1.321	0.022	1|1	0.886|0.720	1.42	1.473|1.358	0.007	1|1	0.597|0.660	0.92	0.790|1.047	0.033	1|1	0.689|0.935	1.35	1.633|1.059	0.165	1|1	0.415|0.951	0.97	0.735|1.199	0.108	1|1	0.618|0.796	Unigene1667_17	MVTQEQLKAIGAVLNNKERPLKERFRALFTLKNLGGAEAIEEISRGFADDSALLKHELAYCLGQMQDKKAIVILTKVLADKTQEPMVRHEAGEALGAIGAPEVIPILEQYKKDPVVEVAETCSIALDRVRWLQSGQKVDDNNPYASVDPSPPISGNKNVEDLKIIYLNPDQSLFNRYRAMFSLRNLRTTESVLAIAEGLKDHSALFRHEVAFVLGQMQEPCSIPYLKDNLEDQNENEMVRHECAEALGAIATEECVNILSHYARDEKRVVKESCEIALDMCEYENSPEFQYADSLGKL	82.21	2e-144	gi|194764905|ref|XP_001964568.1|	GF23253 [Drosophila ananassae]	81.21	8e-145	sp|Q9V9U4|DOHH_DROME	Deoxyhypusine hydroxylase OS=Drosophila melanogaster GN=nero PE=2 SV=1	82.21	7e-144
62	CL674.Contig1_17	GK13731 [Drosophila willistoni]	61263.0054570001	0.295	11	39	-	1.04	1.007|1.066	0.002	39|39	0.966|0.404	1.01	0.985|1.041	0.002	38|38	0.818|0.496	1.01	1.023|1.004	0.000	39|37	0.881|0.969	1.01	1.020|0.991	0.000	39|38	0.801|0.865	0.95	0.967|0.937	0.000	35|34	0.299|0.009	0.98	0.982|0.981	0.000	39|37	0.874|0.782	CL674.Contig1_17	MFSFLKREKNNQEVVENVVGELKKIYRSKLLPLEEHYQFHDFHSPKLEDPDFDAKPMILLVGQYSTGKTTFIRYLLERDFPGIRIGPEPTTDRFIAVMHDEKEGVIPGNALVVDPKRQFRPLSKYGNAFLNRFQCSTLNSPVLQAISIVDTPGILSGEKQRIDRGYDFTGVLEWFAERVDRIILLFDAHKLDISDEFRRSIEALKGHDDKIRIILNKADMIDHQQLMRVYGALMWSLGKVLQTPEVARVYIGSFWDQPLRFDANRRLFEDEEQDLFRDLQSLPRNAALRKLNDLIKRARLAKVHAFIISELRKDMPSVFGKDSKKKDLIKNLGQIYDRIQREHSISPGDFPDIKKMQEVLQHQDFSKFHSLKPHLLDVVDNMLAKDIARLMEMIPQEEM…	94.95	0.0	gi|195450895|ref|XP_002072679.1|	GK13731 [Drosophila willistoni]	70.62	0.0	sp|Q5RBP4|EHD1_PONAB	EH domain-containing protein 1 OS=Pongo abelii GN=EHD1 PE=2 SV=1	94.95	0.0
63	Unigene7435_17	GJ22827 [Drosophila virilis]	22872.409705	0.220	3	4	-	0.96	0.954|0.972	0.000	4|3	0.828|0.936	0.96	0.957|0.968	0.000	4|3	0.902|0.945	1.04	1.023|1.052	0.000	4|4	0.939|0.800	0.93	0.973|0.888	0.004	3|3	0.933|0.471	1.03	1.043|1.015	0.000	4|4	0.867|0.974	0.99	0.992|0.987	0.000	4|4	0.978|0.968	Unigene7435_17	LATLLILNYCAAYSALEDARIIAEYKRYLHTTDHASVARSLVHKTDWASVGSISTNDKITDYPMVNIISVDDSAVDGSSTGRIHFLLTDLDFTGPDWKHINKVTFLFSDDQTLNCKNHGQDPMEPTCARTIISGKVKKLDKNDKNYNEWLQAFTVRHPAAKKWIKAHSFYLCELEIDNIFVLDFYGGPHNIAVNDYYNAK	66.00	4e-74	gi|195391502|ref|XP_002054399.1|	GJ22827 [Drosophila virilis]	34.94	5e-27	sp|O88668|CREG1_MOUSE	Protein CREG1 OS=Mus musculus GN=Creg1 PE=2 SV=1	66.00	1e-73
64	Unigene15776_17	GA26465 [Drosophila pseudoobscura pseudoobscura]	39139.57299	0.371	7	55	-	1.05	1.113|0.989	0.008	55|55	0.065|0.904	1.15	1.083|1.216	0.009	51|55	0.022|0.002	1.19	1.252|1.118	0.009	55|55	0.001|0.120	0.9	0.900|0.891	0.000	54|54	0.012|0.001	1.24	1.305|1.167	0.010	53|48	0.000|0.000	1.11	1.005|1.220	0.023	55|55	0.967|0.002	Unigene15776_17	MADVENGNSNGNYNDEPITEPEQLRKLFIGGLDYRTTDDGLKAHFEKWGNIVDVVVMKDPKTKRSRGFGFITYSQSYMIDNAQNARPHKIDGRTVEPKRAVPRQDIDSPNAGATVKKLFVGGLRDDHDEECLREYFKSYGNIVGINIVADKETGKKRGFAFIEFDDYDPVDKIILQKNHTIKNKVLDVKKAIAKQDMERQGGGGGGGRGQGGRGGGRGGDRSNQGWGGNNRQNGGNWGSNSFGNNGNFGGSQSGPSGPGNWNSQPAPWNNQSGNDGGWNNGGGFGGPGNGASNGWSGNNGGGNFGSDYQQSYGGGPQRGSNFGNNRSAPYNQYNKAGNVGGQSGGFGGNNYNTGGGPSGGNMGGGNRRY	89.39	2e-100	gi|195451840|ref|XP_002073098.1|	GK13334 [Drosophila willistoni]	90.31	4e-100	sp|P48810|RB87F_DROME	Heterogeneous nuclear ribonucleoprotein 87F OS=Drosophila melanogaster GN=Hrb87F PE=2 SV=2	89.39	9e-100
65	Unigene6358_17	GG15326 [Drosophila erecta]	11727.841714	0.294	2	5	-	1.15	1.144|1.164	0.000	5|5	0.319|0.230	0.88	0.879|0.886	0.000	5|4	0.385|0.586	1.09	1.041|1.142	0.005	3|5	0.904|0.254	1.09	1.025|1.149	0.008	5|4	0.881|0.350	0.86	0.866|0.851	0.000	4|5	0.335|0.610	0.77	0.764|0.766	0.000	5|4	0.093|0.103	Unigene6358_17	VKMKFAIVFAAFFIAIAVAVPIDSPSQAQILRLDSDVKPDGYSFALETSDGKTHNEEGQLKNIGAEDETIVVRGSYSFVADDGQTYTVNYIADENGFQPEGAHLPNVGI	83.33	2e-35	gi|194867503|ref|XP_001972084.1|	GG15326 [Drosophila erecta]	61.84	5e-22	sp|P92201|LCP8_DROME	Larval cuticle protein 8 OS=Drosophila melanogaster GN=Lcp65Ag1 PE=1 SV=1	83.33	1e-34
66	Unigene640_17	GJ18862 [Drosophila virilis]	533783.804883988	0.004	1	2	-	0.96	0.994|0.930	0.002	2|2	0.989|0.901	0.84	0.912|0.775	0.009	2|2	0.869|0.668	1.02	0.994|1.048	0.001	2|2	0.993|0.934	0.98	0.874|1.076	0.020	2|2	0.809|0.860	0.9	0.923|0.883	0.001	2|2	0.901|0.849	0.94	0.955|0.921	0.001	2|2	0.938|0.903	Unigene640_17	EVSFGARDGSSGSFSAFNVPCPTGFFRCNDGKCITSLWVCNYQKDCEGGEDEQQSCPPPECEAGQISCGQYVFNKTYCIPPHFRCDMTNDCEDKSDESQCTYRKCQSSDVFCNAPGGLAPSDGSRLAGPCVPKEKRCDGYLDCRNGRDEEGCTGISCRLDQFRCANGQKCIDASLKCNHKDDCGDKSDEQGCNFPACHHGQFRCTNALCIPSNFYCDGYHDCADESDEANCTAIACPDNKFLCPRGGPKGTPKCILKSQLCDGNRDCEDGSDEETACSTASCPALSCEYRCGPSLTGGACYCPSGQSITADNRTCMDRDECAEWGYCDQLCTNTDGSFTCQCTQGYSLFNGTKCIVPDPRNMQLIIAHDRAIVRMSAHGGDPRVLANATAASGVAFHYQ…	87.20	0.0	gi|195393330|ref|XP_002055307.1|	GJ18862 [Drosophila virilis]	40.90	0.0	sp|P98164|LRP2_HUMAN	Low-density lipoprotein receptor-related protein 2 OS=Homo sapiens GN=LRP2 PE=1 SV=3	87.20	0.0
67	Unigene34432_17	1 517 LEN=517_ translated	19766.465931	0.243	1	1	-	1.39	1.768|1.010	0.287	1|1	0.352|0.993	0.94	1.133|0.742	0.076	1|1	0.858|0.699	1.26	1.609|0.910	0.244	1|1	0.485|0.909	1.11	1.122|1.093	0.000	1|1	0.867|0.874	0.86	0.679|1.038	0.064	1|1	0.544|0.974	0.7	0.666|0.732	0.002	1|1	0.480|0.635	Unigene34432_17	XLSLPYTRSLGHINDSTIHPSSSFSTMVKTGTISHIDLSVSDYEKSRKFYNFLLCDLLGYTKVMHEPYCTMWALGPSMICISPGNQTPHHKINPGLHHLAFYTETHDLIDDLYNKVVQFQGENKDMDASVILDKPALYPQYGEGYYGVFFTDPDGIKLELCYVPSRXSDNNKA	-	-	-	-	30.30	1e-07	sp|P54557|YQJT_BACSU	Uncharacterized protein yqjT OS=Bacillus subtilis (strain 168) GN=yqjT PE=4 SV=1	36.11	6e-17
68	Unigene115_17	GK23179 [Drosophila willistoni]	188344.341313999	0.032	4	9	-	1.25	1.165|1.337	0.015	6|8	0.195|0.013	1.27	1.220|1.317	0.005	8|8	0.053|0.019	1.31	1.260|1.362	0.005	9|9	0.099|0.011	0.94	0.889|0.988	0.005	8|9	0.222|0.905	1.22	1.216|1.228	0.000	9|8	0.176|0.015	0.93	0.948|0.904	0.001	9|9	0.709|0.244	Unigene115_17	MFANLKNKLIEEVKASPSKFQQFAAAVSSSASTTPSGSESTTTTTTNENFFSITEEDTPQNSPYKPLKLPLGSVSGRTYQNGPTGGAIPRTRKLSNSSMASDVSFRLPTFESPPVYHLQSDLESNCSELEDTASTAKLEVVTKEQLYDAYKKSLDRYHKYRSRYTDLAKRYKDLERDSTKARSVLVETQEKAIRRISELREQCSLEQQAKAHLEEALRMEMDDMQCKMQAYQTKLKLLGEHPDNVTAILLTNESNDTTGVDSLIDLNDNKSNIILVNSEDLNEKEVVDNIESLKSVQDFSQMEQMKNELDDRQRKIEELMAKMSNAEGTISQLRKQEEENTLLLAQTKQAIHSELENKESEVKKLSNKISEMQKDLQDAAKKEKHLCTQASELNELHEK…	45.97	2e-162	gi|195455250|ref|XP_002074632.1|	GK23179 [Drosophila willistoni]	25.64	8e-14	sp|Q13439|GOGA4_HUMAN	Golgin subfamily A member 4 OS=Homo sapiens GN=GOLGA4 PE=1 SV=1	45.97	8e-162
69	CL2171.Contig1_17	165 1334 minus strand cuticular protein CPG12 [Papilio xuthus]	40785.3147570001	0.495	11	88	-	1.05	1.041|1.055	0.000	84|88	0.548|0.408	0.91	0.923|0.904	0.000	84|86	0.001|0.001	1.07	0.752|1.388	0.202	88|82	0.002|0.001	1.08	0.732|1.434	0.246	86|88	0.001|0.001	0.95	1.228|0.669	0.156	88|86	0.000|0.000	0.89	0.899|0.888	0.000	84|85	0.008|0.010	CL2171.Contig1_17	LLALSAFTYAEEAQKSVEPKSAEPAAAATEVKPSSTAEKKQEKRGIIHGTGYGYGGGALLHGGGHGGGYGGGHGGAVVISGGHGGGGYGGGYGGGYGGGALIAGTGLGGGLGGGLGGGLGGGLGGGISIPTNVQTSYVERQVAVPYQVERAVPYPVQQIVQVPVQVPVPQPYPVEKTVHVPVKQIVKVPVHIPQPYPVEKTVHVQVPVHVDRPVPVKVPVPAPYPVEKVVQVPVKVPVPQPYPVEKIVQVPVKVPVHVPQPYPVERVVQVPVKVPVDRPYPVHVEKPYPVPVEKPVPYPVEKRVTIPVQVPVDHPVPVPVDRPVAVPVKVAVPRPYPVIKEIPVPVERRVPYPVKVPVDVPRPVHVEQHVPVAVEQHVPYKVPVPVPVHV	-	-	-	-	-	-	-	-	-	-
70	Unigene13472_17	GJ14455 [Drosophila virilis]	20228.222115	0.084	1	2	-	1.04	1.123|0.948	0.015	2|2	0.824|0.924	0.77	0.891|0.643	0.031	2|2	0.833|0.300	1.03	1.050|1.007	0.001	2|2	0.940|0.988	1	0.944|1.062	0.007	2|2	0.914|0.879	0.77	0.698|0.834	0.009	2|2	0.318|0.742	0.74	0.797|0.680	0.007	2|2	0.626|0.308	Unigene13472_17	QTQQHFQQQPSVAQQLTLQEQPIPQQQLMEPQQPAQSVQQQYQVVEPETVVSKRFYLHAAPEDDYEEVKQHHVTVGKPRKNYNVVFIKSSDKYTPKTSVKITPAANEEKTVIYVLNKKQDAADIDTQVYEPVTTTAKPEVYFIKYKTAEEASHAQQTIQAQYDALGGSTQVTNEGVAPV	66.41	6e-45	gi|195399772|ref|XP_002058493.1|	GJ14455 [Drosophila virilis]	-	-	-	-	66.41	2e-44
71	Unigene31829_17	GJ18953 [Drosophila virilis]	57802.6288340001	0.066	1	1	-	0.46	0.576|0.343	0.027	1|1	0.360|0.086	0.66	0.658|0.671	0.000	1|1	0.468|0.570	0.46	0.636|0.292	0.059	1|1	0.512|0.065	1.03	1.165|0.892	0.037	1|1	0.801|0.841	0.66	0.588|0.725	0.009	1|1	0.376|0.638	1.56	1.101|2.009	0.412	1|1	0.894|0.248	Unigene31829_17	TNANNANTTNGAGNAAASTITVVASPASSSSSFSSSVSVSSSSSSTAAVNGGNSPVSKSFYAGAANNSHNNNAVNGNSSSGAINYSSTANTTSPVLLGSVSAVTTNGVHTIHTSTPGVPPTYAIMQYQSVASSPSLSSPEPNNSKEMYPLIAPQQQQQRNSMRSPISYSSYDNDSLKDFEISTNGSSGLGRNNTSTPQHQMNQSTQLQQQLSSSGSSASSKNSHIGSTGGGGGGGGSNTNGAVIPQKQKHPNNVPYDPFVHTHNKPPYSFSSLIFMAIEGSNEKALPVKEIYAWIMQHFPYFKTAPAGWKNSVRHNLSLNKSFVKVEKAPNMGKGSLWRVEPQQRQNLIQALNRSPFFPNSAVDKSASLKSPCGTDSLVGYDTVDSVGSSGGGACSPAP…	52.80	2e-90	gi|195393018|ref|XP_002055151.1|	GJ18953 [Drosophila virilis]	62.83	1e-35	sp|Q28G71|FOXN3_XENTR	Forkhead box protein N3 OS=Xenopus tropicalis GN=foxn3 PE=2 SV=1	52.80	6e-90
72	CL912.Contig1_17	GK19965 [Drosophila willistoni]	10121.032044	0.112	1	1	Unigene32333_17	1.04	0.921|1.149	0.026	1|1	0.921|0.866	0.96	0.908|1.013	0.006	1|1	0.901|0.988	1.08	0.987|1.172	0.017	1|1	0.992|0.847	0.95	0.986|0.921	0.002	1|1	0.984|0.884	1	1.032|0.972	0.002	1|1	0.971|0.979	0.92	0.966|0.866	0.005	1|1	0.963|0.841	CL912.Contig1_17	MAAKTYTLEDVKQHNTPDNLWIIIEGKVYDVTKFRNEHPGGEETLDEVGGRDGTRDFLDVGHSQEAKQMLKKYYIGDLEVDKTSKFPVS	61.11	3e-26	gi|195432096|ref|XP_002064062.1|	GK19965 [Drosophila willistoni]	54.88	9e-22	sp|P40312|CYB5_YEAST	Cytochrome b5 OS=Saccharomyces cerevisiae (strain ATCC 204508 / S288c) GN=CYB5 PE=1 SV=2	61.11	1e-25
73	Unigene15458_17	sarcocystatin A [Sarcophaga peregrina]	13217.659998	0.109	1	8	-	1.11	1.186|1.033	0.012	8|8	0.025|0.756	1.01	1.039|0.971	0.002	8|8	0.799|0.830	1.25	1.277|1.218	0.002	8|8	0.004|0.009	0.88	0.848|0.915	0.002	8|8	0.125|0.108	1.13	1.141|1.121	0.000	8|8	0.145|0.184	0.89	0.864|0.923	0.002	8|8	0.059|0.315	Unigene15458_17	FVLFGCVTAAVFAIPEDQLAGGVTQLSGDELKEAEEALQNSLTKLEKGDGPFYKISKVNSASKQVVSGTLYKINVDLIEGNNYVKNCDVEIWSQPWLPEGIQVTFDCYGEMKIVRKHSA	53.33	3e-29	gi|399335|sp|P31727.1|CYTA_SARPE	RecName: Full=Sarcocystatin-A; Flags: Precursor	53.33	3e-30	sp|P31727|CYTA_SARPE	Sarcocystatin-A OS=Sarcophaga peregrina PE=1 SV=1	55.93	3e-27
74	CL967.Contig1_17	LD05259p [Drosophila melanogaster]	29391.317671	0.426	9	93	-	0.7	0.703|0.690	0.000	90|90	0.001|0.001	1.06	1.071|1.039	0.001	90|91	0.001|0.151	0.63	0.638|0.619	0.000	88|90	0.001|0.001	1.09	1.104|1.074	0.000	91|92	0.001|0.001	0.97	0.952|0.994	0.001	92|93	0.015|0.883	1.49	1.469|1.503	0.001	90|91	0.001|0.001	CL967.Contig1_17	MNKFLFVFVALFGAAVAQDSFKCPDDFGFYPHDISCDKYWKCDNNVAELKTCGNGLAFDASDPKFLTENCDYLHNVDCGDRSQLEPPISTPHCSRLYGIFPDENKCDVFWNCWNGEPSRYQCSPGLAYDRDARVCMWADQVPECKNEEVANGFSCPAAGELANAGSFSRHAHPEDCRKYYICLEGVAREYGCPIGTVFKIGDSDGSGNCEDPEDVPGCEDYYGDLDLKSIRKSELLAGLNSEGRTKNASKAKAAAASS	95.20	2e-128	gi|24644504|ref|NP_649611.2|	gasp, isoform A [Drosophila melanogaster]	-	-	-	-	96.31	4e-128
75	Unigene31594_17	FI16856p1 [Drosophila melanogaster]	36415.097778	0.151	3	3	-	1.12	1.049|1.190	0.010	3|3	0.918|0.462	0.87	0.839|0.891	0.001	3|3	0.484|0.742	1.16	1.139|1.176	0.001	3|3	0.618|0.454	0.98	1.026|0.924	0.005	3|3	0.963|0.903	0.89	0.879|0.896	0.000	3|3	0.578|0.781	0.77	0.807|0.739	0.002	3|3	0.339|0.171	Unigene31594_17	FFLLFAVKMSLSKTVGSLNKGNAKEKERSTSKESNNLVVRIDQDSDNNLQALFDSVLNPTESKCPLQVPFRMRQLPESFFKPPATASRSPSVAHSRANSADSAYDTGSQPNVSQGNISTSSVAAVPATITQPQVTANRLSISHSRAHSSPASLQQTYNVHIGNVMETGACIQDGIGPVFTTGTVSFPPGVNAGSGARMEQVDQPVPKDAPNTIQTFHMKQRSYDVVSTIQLQNELGPLPPGWEQAKTNDGQIYYLNHTTKSTQWEDPRIQLKQQIFQDGLSHSVNLKSKESVNLADNLGPLPEGWEQAYTESGDVYFINHVNRTTSWNDPRI	50.00	9e-86	gi|194886073|ref|XP_001976544.1|	GG19955 [Drosophila erecta]	50.00	1e-86	sp|Q45VV3|YORKI_DROME	Protein yorkie OS=Drosophila melanogaster GN=yki PE=1 SV=1	50.00	3e-85
76	Unigene14569_17	596 1756 glutamic acid-rich protein cNBL1700 [Trichinella spiralis]	43668.099374	0.199	7	118	-	1.04	1.105|0.982	0.008	105|108	0.001|0.662	0.62	0.645|0.603	0.001	114|106	0.001|0.001	1.3	1.330|1.263	0.002	111|108	0.001|0.001	0.82	0.777|0.861	0.004	112|116	0.001|0.001	0.78	0.814|0.736	0.003	110|114	0.000|0.000	0.6	0.569|0.637	0.002	113|112	0.001|0.001	Unigene14569_17	ASNQPKKPRDLMEVERLLQEKLRSVTEDTSEIKNSVNAVVTNIKNLLDTLLMQSAESNQQKDINVNVNLKLDAGFEELLKDFMALIKNEVTNSEGSEESTSTEPIEDSSDDSSEDYASISSTGYTNEISSEEQVTEAQVDSAEHSTEQDAKEDNEGNSSVEDFDSWLRLRFGPTVKTPTYDEDTDNSEEENSVEKSEESFESWFNAVYRKHTTEASTDYNNLDEQTHSSQESQENDQKGSVENSKENNEYVGVEYEDVASELDNIIKSSEENSVSEETTENSDEAGSNIYDAIFVPTTMNSLNPSETAEQLENGDRYNYATETEHKMKMQQKIECIQKAYRSSPYDSEILRANLIKCDNADQKLIIDDSDEESKGIEESKESEETDA	77.38	3e-27	gi|312285828|gb|ADQ64604.1|	hypothetical protein [Bactrocera oleae]	-	-	-	-	77.38	9e-27
77	CL452.Contig1_17	35 400 PREDICTED: similar to NAALADase II protein [Strongylocentrotus purpuratus]	14231.443413	0.246	2	3	-	2.72	2.701|2.732	0.000	3|3	0.001|0.001	1.82	1.610|2.024	0.086	3|3	0.109|0.011	3.25	3.417|3.087	0.054	3|3	0.001|0.012	0.89	0.946|0.833	0.006	3|3	0.931|0.350	1.92	1.897|1.939	0.001	3|3	0.096|0.009	0.67	0.711|0.630	0.003	3|3	0.100|0.046	CL452.Contig1_17	ELEIVKEPEVVEILEPTKEHERKEQESAKVVEVVETTVVQTTEPEVKKKAEDVDKLEPTKELERPKERERKEQESTKIVEVIETTTIQTTEPEVAKEPEIVEILELTKELESPKEDQRKEEE	-	-	-	-	-	-	-	-	-	-
78	CL404.Contig2_17	GH22779 [Drosophila grimshawi]	8471.63676299999	0.270	2	15	-	0.72	0.719|0.712	0.000	15|15	0.001|0.001	0.69	0.765|0.622	0.010	15|15	0.001|0.001	0.79	0.815|0.763	0.001	15|15	0.071|0.011	0.89	0.904|0.876	0.000	14|15	0.026|0.007	0.8	0.709|0.888	0.016	14|12	0.000|0.024	0.95	1.024|0.880	0.010	15|15	0.888|0.029	CL404.Contig2_17	MVRLSLIAFAMKPRVSLIKFRKGGLVPVEHPNRLTAIPTVGITRCRAIEDYELPKRYARKPIDLIEMEYINNGG	48.75	5e-10	gi|195056811|ref|XP_001995163.1|	GH22779 [Drosophila grimshawi]	-	-	-	-	48.75	2e-09
79	Unigene15810_17	190 867 takeout precursor [Glossina morsitans morsitans]	25524.032661	0.412	8	64	-	1.02	1.080|0.960	0.007	60|62	0.041|0.312	0.73	0.746|0.721	0.000	61|63	0.001|0.001	1.12	1.142|1.091	0.001	59|61	0.001|0.003	0.91	0.874|0.950	0.003	64|61	0.001|0.041	0.82	0.844|0.794	0.001	64|61	0.000|0.000	0.74	0.700|0.780	0.003	59|59	0.001|0.001	Unigene15810_17	AEFPNDPKPCKFGDEDCLLKAVNFYLREKNQGDTSINLAPIDPIDAGTFTLNQGADNPVNIDLTFSNNKIFGVANATAYKVRGFGKDLTKKHELRFKVPVASLIGDYKIQGRILILPISGSGKNNITMIDAEFILQWVGVPVEKDGATYMKTDKFRTIVKPSKVFFDFQNLFNGDKILGDNMNLFLNENWMEIYQEVDATFTTEISKLMSSIIDSVFDKTPYNKLF	89.82	2e-116	gi|374082400|gb|AEY81370.1|	take out [Bactrocera dorsalis]	43.86	8e-55	sp|Q9VBV3|TAKT_DROME	Protein takeout OS=Drosophila melanogaster GN=to PE=2 SV=1	89.82	6e-116
80	Unigene15370_17	GM17998 [Drosophila sechellia]	27216.311058	0.770	8	161	-	0.95	0.942|0.948	0.000	146|151	0.084|0.175	1.12	1.104|1.128	0.000	148|150	0.001|0.001	0.71	0.713|0.698	0.000	153|160	0.001|0.001	1.4	1.433|1.364	0.002	156|156	0.001|0.001	0.8	0.808|0.792	0.000	149|146	0.000|0.000	1.19	1.171|1.212	0.001	146|156	0.001|0.001	Unigene15370_17	MFKILLSATLCVAMFGSLAYAQCQQPNGTQAVSGSCDAYIECKNGVAEEKICPDGLLYNAKSSGYPCGYPIDVECSQGQARTQAAQPTDECPHQFGYYGMGDSSNCGKFKNCASGRGFVFDCPAGLAWNKDTYKCDWPDQVPDCDAEAYLGFKCPPPKPSPRGQLIGEPEQEYEFYPSSENCQVYFICIEGRPRRIACDEASAFNPETQLCDDIDNVPNCSPDIKQRGQEIKNARLSAQ	73.55	2e-100	gi|195342812|ref|XP_002037992.1|	GM17998 [Drosophila sechellia]	33.06	3e-07	sp|P41996|CPG2_CAEEL	Chondroitin proteoglycan-2 OS=Caenorhabditis elegans GN=cpg-2 PE=1 SV=3	73.55	6e-100
81	Unigene14354_17	ubiquitin protein ligase [Glossina morsitans morsitans]	17237.581099	0.305	3	10	-	0.96	0.858|1.062	0.021	10|9	0.011|0.395	0.97	0.858|1.090	0.027	10|10	0.249|0.700	0.95	0.955|0.949	0.000	10|10	0.687|0.619	1.02	1.094|0.938	0.012	10|9	0.150|0.423	0.95	1.010|0.882	0.008	10|7	0.969|0.216	1.02	0.979|1.057	0.003	10|10	0.922|0.791	Unigene14354_17	MSTPARRRLMRDFKRLQEDPPTGVSGAPTDNNIMIWNAVIFGPHDTPFEDGTFKLTIEFTEEYPNKPPTVRFVSKVFHPNVYADGGICLDILQNRWSPTYDVSAILTSIQSLLSDPNPNSPANSTAAQLYKENRREYEKRVKACVEQSFID	100.00	2e-85	gi|24644103|ref|NP_524230.2|	ubiquitin conjugating enzyme, isoform A [Drosophila melanogaster]	100.00	3e-86	sp|P25153|UBCD6_DROME	Ubiquitin-conjugating enzyme E2-17 kDa OS=Drosophila melanogaster GN=UbcD6 PE=2 SV=2	100.00	8e-85
82	CL3825.Contig1_17	verprolin 1, isoform H [Drosophila melanogaster]	32249.367609	0.041	1	3	CL3825.Contig2_17	0.52	0.697|0.337	0.065	3|3	0.131|0.317	0.56	0.754|0.359	0.078	3|3	0.179|0.433	0.49	0.271|0.704	0.094	3|3	0.360|0.106	1.46	0.428|2.493	2.132	3|3	0.559|0.468	0.57	0.844|0.303	0.146	3|3	0.426|0.337	1.11	1.035|1.189	0.012	3|3	0.934|0.475	CL3825.Contig1_17	QMAIPPPPGPPPPPGPPPPPAMGGLKLGGAGGGDMRSALLQSIQKGTKLKKTTTVDKSGPALAGKICDSTSSATSSPKRIHNNNNNNNISNSNININNMGNGAPKLGGLFEGLTAMPKLKPVNGSSRAQAPAIPTVTNNDLSAASRRNDTSPPANTNSGNNGSSNGPLDFNAELTKHLTLKRQKQQQLQQPVNATEANLRTNRGPPPQPPSTPPKNLSTSASDSVLEKKRNINASSGGIRASPLAANHNSSKASSPTLSESSNGSNKIAGGSSNSIKSKAASLNLTLGKTNSNVVNNKNSMFNANSSSTTTTTTTS	52.63	8e-28	gi|255982989|gb|ACU45762.1|	RE07038p [Drosophila melanogaster]	-	-	-	-	52.63	3e-27
83	CL2539.Contig2_17	61 1278 Eukaryotic translation initiation factor 4E transporter [Camponotus floridanus]	45920.044317	0.027	1	3	CL2539.Contig1_17	0.93	0.824|1.027	0.021	3|3	0.410|0.941	0.94	0.949|0.934	0.000	3|3	0.906|0.877	0.82	0.766|0.874	0.006	3|3	0.220|0.541	1.14	1.202|1.073	0.008	3|3	0.369|0.716	0.84	0.793|0.883	0.004	3|3	0.253|0.696	1.01	1.114|0.905	0.022	3|3	0.765|0.729	CL2539.Contig2_17	EIEAFKKLLEQLGSGNKQLQQQHNQAQELLLPSNLQSNILISPKHRSDPMSPFNAMLPGARLPAPNLSQQIIIKNDELKKIMHPPAFHQQHQNNDGVNILPQPQPIPLSVLFANHPQKRMEQNLFQGIQRGEVSKHFLEQQLNNPNTSQHVKEVIATVLRDASAMATLNTNAPQSQQSCGPIGHQQQHSPICNNSGNPILHQGPTNSTIELQQQQLLQQIPNSNVMISGQTERISLLPHQAPNHQAIPGQREIQFHTHSIMQNAMMKKKIEEQQDSIRRRQEKHPQSNNMMLGLNEVDTQQKNIQQMHLSNNMQQQTTGTQQQTHVLHPIQQQQHQPSRHINSPTPLAFTPTSVLRKMTAEKDNSNSNATSQHHTPSNSVIQQQNKAQNAFMNPTNNQH…	37.06	5e-13	gi|170062094|ref|XP_001866520.1|	conserved hypothetical protein [Culex quinquefasciatus]	-	-	-	-	37.06	2e-12
84	Unigene15820_17	CG7461 [Drosophila melanogaster]	65530.5733070002	0.155	7	18	-	1.12	1.154|1.085	0.002	17|14	0.154|0.346	1	0.938|1.066	0.008	18|15	0.668|0.583	1.26	1.244|1.270	0.000	18|18	0.001|0.001	0.86	0.811|0.914	0.005	16|17	0.022|0.167	1.09	1.134|1.052	0.003	17|18	0.031|0.544	0.86	0.868|0.845	0.000	18|15	0.010|0.003	Unigene15820_17	KSDTKSSQLKNSSSFMMNIFRGKLVSGEVFPYPDLLAADEKELITSLVGPFEKFFSETNNAIRNDENSSVDGTVLDQLWELGAFGIQVPEKYGGLGLGNTQYGRLCEILGANDLGVGIILGAHQSIGFKGILLFGTQQQKEKYLPKLTTEKVYAAFALTEPSSGSDAGSIRTRAVKSDDGKYFVLNGSKIWISNGGIADVMTVFAQTDQVDPKTGEKKDKITAFIVERSFGGVTNGPPEKKMGIRASNTAEVYFDNVKVPIDNVLGGEGDGFKVAMTILNNGRFGMGATLAGTMKFCIQKAVEHANNRVQFGQKIKEYGCIQEKISQMNILQYATESMAYTISQNMDKGSKEYQLEAAISKIFASESAWYVCDEAIQILGGMGYMKEAELERVLRDLRI…	72.01	0.0	gi|194881310|ref|XP_001974791.1|	GG21959 [Drosophila erecta]	58.02	0.0	sp|P48818|ACADV_BOVIN	Very long-chain specific acyl-CoA dehydrogenase, mitochondrial OS=Bos taurus GN=ACADVL PE=2 SV=3	72.01	0.0
85	Unigene7569_17	GI18385 [Drosophila mojavensis]	34450.407231	0.236	6	25	-	1.15	1.211|1.094	0.007	24|25	0.001|0.037	1.14	1.158|1.130	0.000	24|24	0.001|0.001	1.46	1.536|1.375	0.013	23|25	0.001|0.001	0.77	0.760|0.784	0.000	22|24	0.001|0.001	1.45	1.445|1.459	0.000	22|25	0.000|0.000	1	0.963|1.027	0.002	25|25	0.618|0.727	Unigene7569_17	MFSSNARNLIRSNLINRCKSTLVVAEHNNEALNPVTLKTISAAKKIGGDVTVLVAGTKCGPASEAVAKVEGVAKVLVAENAAFNGFTPESITPLVLAAQSQFKFTHILAGATAFGKNVLPRVASKLDVSPISEIIDVKSEDTFVRTIYAGNAILTLRSKDPVKVITVRSTNFAPAAATGGSGAIEQAPSGDYASQLSEFVSQELTKSDRPELTGAKVIVSGGRGLKSGDNFKLLYDLADKFGAAVGASRAAVDAGYVPNDLQIGQTGKIVAPELYIAVGISGAIQHLAGMKDSKTIVAINKDPEAPIFEVADIGLVADLFKAVPELTKKL	91.52	1e-154	gi|195441927|ref|XP_002068713.1|	GK17923 [Drosophila willistoni]	66.77	8e-110	sp|P13804|ETFA_HUMAN	Electron transfer flavoprotein subunit alpha, mitochondrial OS=Homo sapiens GN=ETFA PE=1 SV=1	91.52	5e-154
86	Unigene29205_17	GD11316 [Drosophila simulans]	75448.404718	0.036	1	1	-	1.71	1.840|1.587	0.032	1|1	0.350|0.421	1.42	1.097|1.742	0.208	1|1	0.903|0.454	1.17	1.183|1.155	0.000	1|1	0.863|0.863	1.59	1.623|1.557	0.002	1|1	0.400|0.284	0.91	1.057|0.770	0.041	1|1	0.959|0.719	0.83	0.724|0.932	0.022	1|1	0.593|0.935	Unigene29205_17	MPSNTVNPDLQRERQKANFNTQEFTYWWLGGKEKYEAKKKLEKMFLDDPELQDEIPISYMSPKELYEHSVRKAVIIVKKLHELRADGEDDVDTYTAIFGGALGSALIKEGNPMMLHFVMFVPTIMGQGTVEQQVEWLSKAWDCSILGTYAQTELGHGTFLRGLETRAEYDATTQEFVLNTPTISAYKWWPGGMGHTANHAIVVAQLYTKGVFRGLAPFIVQLRDLETHMPMPGIDVGDIGPKIGMKSVNNGYLGLKNVRVPLNNMLMKNQQVLPDGTYVAPKNSVLTYGTMMFVRVALIRDLSQTLAKASTIAMRYSAVRHQSPIDPNKPEPQIIEHTTQQLKVFPQIAKAIIFKITGEHIWNMFNNVSGELEQGNLERLPEMHALSCCLKAITSADSA…	78.03	0.0	gi|195584373|ref|XP_002081982.1|	GD11316 [Drosophila simulans]	77.58	0.0	sp|Q7KML2|ACOX1_DROME	Probable peroxisomal acyl-coenzyme A oxidase 1 OS=Drosophila melanogaster GN=CG5009 PE=1 SV=1	78.03	0.0
87	Unigene14667_17	GK20647 [Drosophila willistoni]	13556.76444	0.640	4	156	-	1.38	1.514|1.245	0.036	149|153	0.001|0.001	0.76	0.832|0.683	0.011	148|152	0.001|0.001	1.36	1.416|1.309	0.006	156|156	0.001|0.001	1.09	1.036|1.143	0.006	155|148	0.436|0.001	0.75	0.766|0.736	0.000	153|150	0.000|0.000	0.63	0.672|0.595	0.003	151|156	0.001|0.001	Unigene14667_17	MVKILVLFACLAVAAVSAAPTDVPQLEHEIVPILKSEINKHEDGSYDLHYEGGDGTVRKEEANVVDEGTEDEALEIKGSYKYINSEGEEVEVFYTAGKNGFVPYGSIINPEISAVAEAAKDLPKE	75.76	2e-37	gi|195426966|ref|XP_002061552.1|	GK20647 [Drosophila willistoni]	39.56	3e-12	sp|Q7M4F0|CUD9_SCHGR	Endocuticle structural glycoprotein SgAbd-9 OS=Schistocerca gregaria PE=1 SV=1	75.76	9e-37
88	Unigene30404_17	GJ15728 [Drosophila virilis]	33176.044142	0.192	4	20	-	0.82	0.769|0.877	0.006	18|20	0.001|0.094	0.97	0.966|0.973	0.000	20|20	0.314|0.644	0.92	0.915|0.924	0.000	20|18	0.435|0.392	0.93	0.957|0.902	0.002	20|20	0.497|0.002	1.06	1.051|1.059	0.000	19|20	0.155|0.054	1.12	1.138|1.107	0.000	20|20	0.148|0.221	Unigene30404_17	MALIPPVTRLTSSIIRILGCNPGPMTLQGTNTYLLGTGKRRILIDTGDVDVPEYIKHLTSVLNQEQAVLSTIILTHWHHDHVGGVKDVIKTCGESECLVYKFPRTDGLDVCPEIPANIKVHPLQDEQELSVDGAKVKIIHTPGHTTDHVVLITEDGKLFSGDCILGEGTAVFEELYDYMKSLYKILSIKPEVIYPAHGNIIEEPVDKIKYYINHRNQREVQVLDFFSRNPNKPLQAMDVVRDVYKETPEQLWSAAAYNVGHHLEKLQREGKLKLTSNNDEKYYEFQKCSAL	72.60	1e-125	gi|195398801|ref|XP_002058009.1|	GJ15728 [Drosophila virilis]	68.84	3e-121	sp|Q9VLS9|LACB2_DROME	Beta-lactamase-like protein 2 homolog OS=Drosophila melanogaster GN=CG12375 PE=1 SV=1	72.60	5e-125
89	Unigene31763_17	GK13927 [Drosophila willistoni]	27645.179122	0.191	3	4	-	1.47	1.640|1.295	0.060	3|4	0.042|0.440	1.13	1.186|1.081	0.006	4|4	0.338|0.874	1.59	1.679|1.504	0.015	4|4	0.041|0.271	0.88	0.875|0.886	0.000	4|4	0.426|0.380	1.27	1.203|1.340	0.009	4|4	0.549|0.089	0.84	0.876|0.805	0.003	4|4	0.502|0.208	Unigene31763_17	FKGKIVLITGASSGIGAAAAVKFAKLGAKLALVGRNTENLKETAAKCENAAEGSLIPLLIKINLTDESAMPNIISEVLGRYGQLDVLVNSAGIIENGTIENTSLDQFDRIMDTNVRSVYQLTMLAVPELIKTEGNIVNISSVCGLRAFPNVLAYNISKSAIDQFTRCVALELAPKGVRCNSVNPGVVVTNLHKRAGMNDEAYEKFLEHCRTTHALGRAGDVEEVANAVCFLASDLATFTTGMNMPVDGGRHAMCPR	66.80	5e-89	gi|195451722|ref|XP_002073048.1|	GK13927 [Drosophila willistoni]	34.27	4e-28	sp|Q9X248|FABG_THEMA	3-oxoacyl-[acyl-carrier-protein] reductase FabG OS=Thermotoga maritima (strain ATCC 43589 / MSB8 / DSM 3109 / JCM 10099) GN=fabG PE=3 SV=1	66.80	2e-88
90	Unigene15203_17	GE19265 [Drosophila yakuba]	43390.0301280001	0.104	3	4	-	0.82	0.855|0.791	0.002	3|4	0.508|0.144	0.75	0.795|0.713	0.003	4|4	0.154|0.067	0.78	0.687|0.865	0.016	4|4	0.052|0.346	0.97	0.914|1.020	0.006	4|3	0.565|0.929	0.78	0.790|0.777	0.000	4|3	0.114|0.295	0.93	1.035|0.822	0.023	4|3	0.941|0.389	Unigene15203_17	AFLTLFVVGVAAASESIVLVLAPAERIPALSRVDNESFSRIAKPLLKDHMIAVFQEDDLSFNDFLCRSNRSEQQSCYSHLQNVTPRTFYMRVDSPETVLEKLDPNYEVITISRSGKLETPLKCKEGKVAFLRFSGGISLSRKDALEAHDFAISNVMKQISCPTVFMYTSTPAKDVTVKKRSRRALSVWETAAPKGGIIFTDPKFQIFYTTLAVKIGSNKPKEITVSNMKIDDHNTTDFSVTLSGSDIADVITFDIELKKGYYYMQQLTYKDTQFRTSDINAPPAFSYFCGNLTVYSPNGNQLLWNSLQFQAPFGSKVKTVNEKYFEFGESWNCVGFVTHAILAGLFVSAILLTILFVGICWMMDINTMDRFDDPKGKTITINAS	82.44	1e-123	gi|312285710|gb|ADQ64545.1|	hypothetical protein [Bactrocera oleae]	32.17	2e-08	sp|P40682|VAS1_BOVIN	V-type proton ATPase subunit S1 OS=Bos taurus GN=ATP6AP1 PE=1 SV=1	82.44	4e-123
91	Unigene7503_17	GK16697 [Drosophila willistoni]	13318.031006	0.241	3	13	-	0.67	0.633|0.714	0.003	13|7	0.001|0.003	0.75	0.704|0.801	0.005	13|12	0.001|0.001	0.63	0.633|0.618	0.000	13|11	0.001|0.001	1.07	1.148|0.994	0.012	13|11	0.002|0.931	0.71	0.715|0.697	0.000	12|13	0.001|0.000	1.05	1.054|1.054	0.000	13|11	0.308|0.389	Unigene7503_17	MSPMSGLRQQLKMLGTALLGKRTTKSVKKKPFTEVEIKDLRTAFDLLDRNRDGRVTANELQFMLKNLGINVRDEIIHDLIREASHSGNGLINEAEFLQWVGRIQALRDEQQQQQQQ	99.08	8e-57	gi|194749336|ref|XP_001957095.1|	GF10252 [Drosophila ananassae]	97.25	1e-56	sp|P48593|E631_DROME	Calcium-binding protein E63-1 OS=Drosophila melanogaster GN=Eip63F-1 PE=2 SV=2	99.08	4e-56
92	Unigene6075_17	GF22806 [Drosophila ananassae]	37550.311635	0.248	6	26	-	1.06	1.006|1.121	0.007	25|26	0.960|0.038	1.19	1.176|1.201	0.000	24|26	0.001|0.012	1.07	1.023|1.108	0.004	26|26	0.824|0.035	0.97	1.003|0.944	0.002	25|22	0.972|0.013	1.21	1.178|1.234	0.002	26|26	0.021|0.001	1.12	1.186|1.057	0.008	26|24	0.001|0.354	Unigene6075_17	SEEKRALDRMHNDIYQELRQAAEAHRQTRQYMQRYIKPGMTMIQICEELESTARCLIGENGLEAGLAFPTGCSLNHCAAHYTPNAGDNTVLQYDDVCKIDFGTHIKGRIIDCAFTLTFNNKYDKLLQAVKEATNTGIKEAGIDVRLCDVGAAIQEVMESYELELDGKTYPIKSIRNLNGHSISPYRIHSGKTVPIVKGGESTRMEENEFYAIETFGSTGRGLVHDDMDCSHYMKNFDAPFVPLRLQSSKQLLGTINKHFGTLAFCKRWLDRAGATKYQMALKDLCDKGVVEAYPPLCDIRGCYTAQYEHTIMLRPSCKEVVSRGDDY	95.11	0.0	gi|195438375|ref|XP_002067112.1|	GK24191 [Drosophila willistoni]	76.45	2e-154	sp|Q3ZC89|AMPM2_BOVIN	Methionine aminopeptidase 2 OS=Bos taurus GN=METAP2 PE=2 SV=1	95.11	0.0
93	Unigene15881_17	ATP citrate synthase [Glossina morsitans morsitans]	51582.4922190001	0.195	7	32	-	1.02	0.997|1.051	0.001	32|32	0.968|0.384	0.98	0.979|0.990	0.000	31|32	0.816|0.949	1.06	1.037|1.079	0.001	32|31	0.464|0.113	0.98	0.997|0.957	0.001	32|32	0.984|0.455	1.01	0.995|1.034	0.001	32|32	0.967|0.734	0.96	0.986|0.930	0.002	32|32	0.894|0.326	Unigene15881_17	MSIYRISTRKLPEAQKFNGLLVRFISADSSLRDVLAAKIPAEQERVKNFRKQYGATKMGETTIDMMYGGMRGIKGLVCETSVLDADEGIRFRGLSIPECQKVLPKADGGEEPLPEGLFWLLLTGDVPTKGQVKQLSKEWAERAALPQHVVTMLNNMPTTLHPMSQLACAVTALNHDSKFAKAYSEGVHKSKYWESVYEDSMDLIAKLPVVAATIYCNTYRGGKGSKSIDSSQDWSANFVKMLGYDNPKFTELMRLYLTIHSDHEGGNVSAHTVHLVGSALSDPYLSFAAGMNGLAGPLHGLANQEVLVWLRKLQKQLGANPSEDELKDYVWKTLKSGQVVPGYGHAVLRKTDPRYTCQREFALKHLPNDDLFQMVSKIYKIVPPILTETGKVKNPWPNV…	90.54	0.0	gi|122092322|sp|Q0QHL3.1|CISY_GLOMM	RecName: Full=Probable citrate synthase, mitochondrial; Flags: Precursor	90.54	0.0	sp|Q0QHL3|CISY_GLOMM	Probable citrate synthase, mitochondrial OS=Glossina morsitans morsitans PE=2 SV=1	90.54	0.0
94	CL1045.Contig4_17	GD22640 [Drosophila simulans]	58506.4892420001	0.038	1	1	CL1045.Contig3_17	0.85	0.666|1.043	0.071	1|1	0.544|0.964	0.81	0.810|0.809	0.000	1|1	0.751|0.813	1.16	0.964|1.363	0.080	1|1	0.974|0.654	0.73	0.759|0.700	0.002	1|1	0.635|0.397	1.09	1.061|1.122	0.002	1|1	0.955|0.901	0.96	1.144|0.774	0.068	1|1	0.856|0.722	CL1045.Contig4_17	MDFLFVILSTLILLLVSFLRYKYQYWERLGVPQLKMNYLFGNLFRIKTMHKNEILHAVYKEFHGKAKIAGTYIFTKPLAVILDLDLIKSVLIKDFNKFTDRVEYMENTQSSVTDNLFFLHAEKWRPLRTKLTPTFTSAKMKFMFPTLVTVAHQLEEAFSAQLAKTPSADVELHDLMGRFTTDVIGHCAFGIECNSLKDPNVEFRRIGHQIFYPNFFSIRLRIFMITYPAVFKYLKIFNVSERPKDIEDFILKLVRDTVRFREEHHVQRNDFLNMLIEMKNSKDSKGAPPMSIEEVAAQVFIFFAAGFETSSSNMSYGLYELAKNPHVQEKLRTEIKSVLEKHNGELTYEAMMEMTYLDQVITETLRKYPALAALTRVSVEEYKVPGTDITLEKGTRMYI…	55.01	5e-157	gi|195576792|ref|XP_002078257.1|	GD22640 [Drosophila simulans]	45.92	3e-122	sp|Q9V4U7|C6A14_DROME	Probable cytochrome P450 6a14 OS=Drosophila melanogaster GN=Cyp6a14 PE=3 SV=2	55.01	2e-156
95	Unigene15426_17	protein phosphatase 2A	35998.465047	0.036	1	2	-	1.11	1.147|1.071	0.003	2|2	0.788|0.904	1.08	1.208|0.955	0.032	2|2	0.708|0.951	1.21	1.087|1.340	0.032	2|2	0.899|0.463	0.93	0.793|1.069	0.038	2|2	0.556|0.868	1.16	1.174|1.155	0.000	2|2	0.759|0.815	0.98	1.074|0.883	0.018	2|2	0.898|0.813	Unigene15426_17	MEDKATTKDLDQWIEQLNECNQLTETQVRTLCDKAKEILSKESNVQEVKCPVTVCGDVHGQFHDLMELFRIGGKSPDTNYLFMGDYVDRGYYSVETVTLLVALKVRYRERITILRGNHESRQITQVYGFYDECLRKYGNANVWKYFTDLFDYLPLTALVDGQIFCLHGGLSPSIDSLDHIRALDRLQEVPHEGPMCDLLWSDPDDRGGWGISPRGAGYTFGQDISETFNNTNGLTLVSRAHQLVMEGYNWCHDRNVVTIFSAPNYCYRCGNQAALMELDDSLKFSFLQFDPAPRRGEPHVTRRTPDYFL	100.00	0.0	gi|17136620|ref|NP_476805.1|	microtubule star [Drosophila melanogaster]	100.00	0.0	sp|P23696|PP2A_DROME	Serine/threonine-protein phosphatase PP2A OS=Drosophila melanogaster GN=mts PE=2 SV=1	100.00	0.0
96	Unigene14263_17	GH15269 [Drosophila grimshawi]	16302.20868	0.177	2	19	-	0.79	0.767|0.805	0.001	19|19	0.001|0.001	0.86	0.900|0.813	0.004	19|19	0.002|0.001	0.95	0.887|1.018	0.009	19|19	0.032|0.863	0.83	0.800|0.864	0.002	18|19	0.001|0.030	1.02	1.007|1.030	0.000	18|19	0.930|0.759	1.07	1.125|1.018	0.006	17|19	0.001|0.849	Unigene14263_17	ASTGVVVPRNFRLLEELDQGQKGVGDGTISWGLENDDDMTLTHWIGMIIGPPRTPYENRMYSLKIECGDRYPDEPPAIRFLTRININCINQSNGVVDHRLVPMLARWNREYTIKSMLQEIRRIMTCKENLKLAQPPEGSVF	90.07	3e-72	gi|195014175|ref|XP_001983973.1|	GH15269 [Drosophila grimshawi]	68.09	4e-57	sp|Q7M767|UB2V2_RAT	Ubiquitin-conjugating enzyme E2 variant 2 OS=Rattus norvegicus GN=Ube2v2 PE=1 SV=3	90.07	1e-71
97	CL978.Contig2_17	GF22618 [Drosophila ananassae]	73235.4949450001	0.051	3	6	CL978.Contig1_17	1.05	0.991|1.109	0.007	6|5	0.977|0.475	1.17	1.166|1.177	0.000	5|6	0.269|0.170	0.98	0.987|0.980	0.000	6|6	0.980|0.950	1.02	1.040|0.998	0.001	6|6	0.926|0.994	1.12	1.145|1.089	0.002	6|6	0.648|0.686	1.13	1.090|1.162	0.003	6|6	0.761|0.548	CL978.Contig2_17	MADILNVEHHQVLEEYQQTLAELLPNIDANKDGFIDLCELKDALGQVGFKLPGYQVREMIDEFQNKQRTSHHGKLNIEEFENLCLDLKSKDVASTFKTVVSKKENLETLGGMSSISSEGTTHSVRLEEQLAFSDWINSNLGYDQDLKHLLPIDAEGKHLYQAIKDGILLCKIINHSCPDTIDERAINKKNLTVYREFENLTLALVSSQAIGCNIVNIDAHDLAKGKPHLVLGLLWQIIRIGLFSHITLDSCPGLAGLLFDNERLEDLMKLSPEAILLRWVNHHLERAGISRRCTNFQSDIVDSEIYSHLLKQIAGNEVDVNLDALRESDLTSRAEIMLQQAAKLNCRSFLTPQDVVNGVYKLNLAFVANLFNNHPGLDRPEQIDGLESIEETREEKTYR…	91.63	0.0	gi|195392608|ref|XP_002054949.1|	GJ19059 [Drosophila virilis]	54.84	7e-175	sp|Q63598|PLST_RAT	Plastin-3 OS=Rattus norvegicus GN=Pls3 PE=2 SV=2	91.63	0.0
98	Unigene15584_17	GK18674 [Drosophila willistoni]	73324.087739	0.133	6	9	-	1.84	1.704|1.983	0.039	9|7	0.016|0.001	1.57	1.555|1.589	0.001	9|9	0.003|0.007	2.22	2.040|2.391	0.062	9|9	0.019|0.001	0.85	0.858|0.850	0.000	7|9	0.266|0.290	1.84	1.658|2.024	0.067	8|8	0.001|0.004	0.85	0.953|0.751	0.020	9|9	0.888|0.012	Unigene15584_17	NALLLQALFLSTTVRAYSTNSPGSCSSNSLKSDARAFFERENESLRQRRRNEFLTSYAYNTNVTEENRKAMIAVATANAAANKEMTRSVIASGYIDSSDEDIKRQATILGDLGIDVLPESDYKELLNSVSLMQSNYATATVCPYNKEGDCTLQLEPHIQERLSDSRDPKELKHYWRQWYDKAGTPMRENFKKYIELTRKSARLNGYSSYADYWIHFYEDPDFETNLEKVYKAILPLYREIHGYVRYRLREYYGDEIVSENGNIPLHLLGNMWGQQWDNALPLFTPFPEKPFVDVTSEMQRQNYTVRNLFELGDQFFQSLGMRALPPSFWDLSVLTRPTDREIVCHASAWDLYENSDVRIKMCTDVNTHYLYVVHHELGHIQYYLQYENQPTVYRSAPNP…	70.52	0.0	gi|195116727|ref|XP_002002903.1|	GI10464 [Drosophila mojavensis]	68.06	0.0	sp|Q9VLJ6|ACER_DROME	Angiotensin-converting enzyme-related protein OS=Drosophila melanogaster GN=Acer PE=1 SV=1	70.52	0.0
99	Unigene15780_17	114 629 minus strand microtubule-binding protein [Glossina morsitans morsitans]	19944.564252	0.506	7	47	-	1.11	1.136|1.081	0.002	45|47	0.001|0.045	1.22	1.237|1.200	0.001	46|46	0.001|0.001	1.35	1.404|1.289	0.007	45|43	0.001|0.001	0.8	0.799|0.810	0.000	46|47	0.001|0.001	1.44	1.401|1.470	0.002	44|44	0.000|0.000	1.09	1.069|1.103	0.001	47|47	0.331|0.011	Unigene15780_17	MKIYKDIITGDEMFADTYKMKLVDEVIYEVYGKLVSRSQGEINIDGFNPSAEEADEGTDSAVECGVDVVLNHRLQECFAFGDKKSFTLYLKDYMKKVLAKLEQNSPDQVDVFKTNMNKVMKEILGRFKDLQFYTGESMDCDGMVAMCEYRELDGVSTPVLMFFKHGLEEEKC	86.05	9e-83	gi|195395390|ref|XP_002056319.1|	GJ10886 [Drosophila virilis]	81.87	8e-82	sp|Q60FS1|TCTP_PLUXY	Translationally-controlled tumor protein homolog OS=Plutella xylostella GN=Tctp PE=2 SV=1	87.79	2e-85
100	Unigene32082_17	easily shocked, isoform C [Drosophila melanogaster]	38172.107183	0.066	1	1	Unigene32081_17	1.21	1.092|1.318	0.026	1|1	0.921|0.669	1.13	1.049|1.210	0.013	1|1	0.963|0.843	1.12	1.068|1.174	0.006	1|1	0.952|0.844	1.13	1.215|1.054	0.013	1|1	0.787|0.930	1.01	0.995|1.020	0.000	1|1	0.993|0.984	0.93	0.992|0.858	0.009	1|1	0.989|0.846	Unigene32082_17	MGTETKFNSYKENTTATTSSVFRSKVAHNGSSATAIDAGVGVNVGISGVGQKLLSSNGALNGALNSKQQHNNITNHRSNKSEAILTPVFVPIHIGEDVISGAKEILKVIRPQWNISHVQFKKFTDGITNKLVGCFYNPPQTTTTTNRNGNEIDTGNAYGNDTPNSPSTLASSTMLEDNNDSGNISDTDTLDIELTTSSALDIDGHNASNIVNTKDESCHNSPINDSNVALVRVYGNKTDLLIDRKAETRNIQLLHTYGFAPTLFATFKNGLVYDFVPGATLKPASVLEPNIWRLVATRMAEMHRRVQVHEAPAACSGGGAGVPHVPMLWHKTQSFFDLVPERFSDPEKHKR	45.21	1e-63	gi|24642424|ref|NP_523364.2|	easily shocked, isoform A [Drosophila melanogaster]	42.53	1e-60	sp|P54352|EAS_DROME	Ethanolamine kinase OS=Drosophila melanogaster GN=eas PE=1 SV=2	46.05	1e-62
101	Unigene14457_17	GG22162 [Drosophila erecta]	24163.34898	0.231	3	11	-	0.92	0.962|0.885	0.003	9|11	0.620|0.241	0.83	0.838|0.823	0.000	11|10	0.102|0.023	1.17	1.219|1.112	0.006	11|10	0.003|0.143	0.83	0.809|0.847	0.001	10|11	0.005|0.008	1.01	1.055|0.972	0.003	9|11	0.385|0.795	0.87	0.764|0.979	0.023	10|11	0.001|0.892	Unigene14457_17	AGANAKSGIYHLYLPDSGLKPFYAYCLLDTNGGPAWTVVQRRQDGSIAFHRDWDEYQAGFGNWNGEYFIGLERLHGITHAELNELWIQMEDFENVTRYARYENFAIGDEHEAYALNMLGKFEGNAGDSLRSSQGQKFSTKDADHDMWDRNCAAEYTGAWWYKACHDSNLNGQYLRGKYSKDKYGKGIDWTHWHGHEYSLKYVHMAVRP	52.38	2e-53	gi|194882108|ref|XP_001975155.1|	GG22162 [Drosophila erecta]	47.09	1e-47	sp|Q8N539|FBCD1_HUMAN	Fibrinogen C domain-containing protein 1 OS=Homo sapiens GN=FIBCD1 PE=1 SV=2	52.38	7e-53
102	Unigene15389_17	GA10310 [Drosophila pseudoobscura pseudoobscura]	9946.960662	0.279	2	5	-	0.95	0.921|0.976	0.002	4|5	0.665|0.904	0.93	0.871|0.982	0.006	5|5	0.334|0.948	1.15	1.098|1.196	0.005	4|5	0.603|0.265	0.82	0.837|0.801	0.001	3|3	0.340|0.150	1.1	1.203|0.995	0.022	5|4	0.221|0.992	0.9	0.894|0.898	0.000	4|4	0.620|0.550	Unigene15389_17	MPLAKDLLHPLPAEEKRKHKLKRLVQHPNSYFMDVKCPGCYRITTVFSHAQGVVVCAGCATILCQPTGGRAKLTEGCSFRRKPQUN	98.84	9e-44	gi|198462092|ref|XP_001352335.2|	GA10310 [Drosophila pseudoobscura pseudoobscura]	84.15	2e-36	sp|P55833|RS27_HOMAM	40S ribosomal protein S27 OS=Homarus americanus GN=RPS27 PE=3 SV=2	98.84	4e-43
103	Unigene15640_17	GF15876 [Drosophila ananassae]	52934.3747020001	0.431	13	176	-	1.28	1.358|1.200	0.012	169|170	0.001|0.001	1.39	1.372|1.398	0.000	170|172	0.001|0.001	1.47	1.532|1.410	0.007	172|174	0.001|0.001	0.88	0.859|0.899	0.001	173|173	0.001|0.001	1.55	1.601|1.500	0.005	175|171	0.000|0.000	1.06	0.993|1.125	0.009	172|176	0.894|0.001	Unigene15640_17	KAAISTARKIALFAHHSVSVAPQSPLVNFGAKVPSLSPFGLQFLIIKRLNSSMPIKSIFARQIFDSRGNPTVEVDLCTELGLFRAAVPSGASTGVHEALELRDNDKNSYHGKAVTKAVDHVNKSLGPELLKANLEVTDQEGIDNFMLKLDGTENKSKFGANAILGISLAVCKAGAAKKGVPLYQHIADLACNNDIILPVPAFNVINGGSHAGNKLAMQEFMILPTGACSFTEAMKIGSEVYHHLKKVIKDKFGLDATAVGDEGGFAPNIQSNKEALVLIQDAIAKAGYTGKVEIGMDVAASEFHKDGQYDLDFKNPNSDKSQWLSPEKLTNLYQEFIKEFPIVSIEDPFDQDHWEAWTTITANTQIQIVGDDLTVTNPKRIQTAVEKKACNCLLLKVNQ…	84.97	0.0	gi|194762349|ref|XP_001963312.1|	GF15876 [Drosophila ananassae]	81.99	0.0	sp|P15007|ENO_DROME	Enolase OS=Drosophila melanogaster GN=Eno PE=1 SV=2	84.97	0.0
104	CL597.Contig2_17	GJ22649 [Drosophila virilis]	46721.876979	0.490	14	169	-	1.39	1.375|1.409	0.001	159|161	0.001|0.001	1.1	1.045|1.146	0.005	162|159	0.048|0.001	1.14	1.151|1.129	0.000	167|164	0.001|0.001	1.24	1.281|1.200	0.003	157|160	0.001|0.001	0.89	0.919|0.859	0.002	165|166	0.001|0.000	0.78	0.766|0.791	0.000	165|168	0.001|0.001	CL597.Contig2_17	NLVCFYDSNGVTRSGAAQFSTADLEVALQFCTHVIYGYVGIKPDTFQLMSLNENLDIQRRHFATITALKEKFPYIKFLLSVGGDRDVGGHEKYINLLEGGRQKQTAFIDSVRDFLRSYNFDGIDLAFQLPRNKPRKVHSDTGAVWKSFKKFFTGDFIVDEKANEHKEEFTDLVKDLKNTLRTDNLLLSLTVLPNVNSSWYFDAPAIADSLDLINLATFDFLTPERNPEEADFSAPLYELYDQNRLLHYNVNFQVENWLLQRVPAGKINVGIPTFGRAWKMTKDSGTTGLPVVPATEGAAPAGPITKTPGLLNWLEICQRLPNPSNINAKGADAPLRRISDPTKRFGTYAFHTADEDGANGVWVSYEDPDTAASKSGYVKAKNLGGVALFDITLDDFRGQ…	72.60	0.0	gi|195387135|ref|XP_002052255.1|	GJ22649 [Drosophila virilis]	66.59	3e-177	sp|Q8MLZ7|IDGF3_DROME	Chitinase-like protein Idgf3 OS=Drosophila melanogaster GN=Idgf3 PE=1 SV=3	72.60	0.0
105	Unigene15745_17	57 731 gmfb8A [Glossina morsitans morsitans]	25690.912387	0.751	14	541	-	1.09	1.094|1.083	0.000	531|535	0.003|0.035	1.12	1.120|1.124	0.000	473|473	0.001|0.001	1.16	1.196|1.128	0.002	538|541	0.001|0.001	0.92	0.914|0.920	0.000	499|517	0.001|0.001	1.27	1.301|1.233	0.002	489|465	0.000|0.000	1.16	1.105|1.224	0.007	474|523	0.001|0.001	Unigene15745_17	MKHSLLLVAGALLFVQFAHTLPHMKRESVAVEIQSQNSIHHTSGSSSEEDNPQAQLMIYTLAEIAKLSTWILEKGSIVMKNAVNELKEIPVKDELLQANITRMSEVAKESSEFTLKEDEESILKLLLSMVNFATMMDDYDNMPADSKLKQTLQTALENNGYNKFESDFEEKVLQMAKDFDVAFGEYVKVLSPEEKLKQAKLLEWYDDFKAENDEEKKLDKFGNFF	-	-	-	-	-	-	-	-	-	-
106	CL1093.Contig2_17	GA21024 [Drosophila pseudoobscura pseudoobscura]	80919.7637569998	0.046	2	4	CL1093.Contig1_17	1.06	0.931|1.198	0.036	4|4	0.836|0.261	0.96	0.977|0.940	0.001	4|4	0.963|0.842	0.84	0.779|0.900	0.007	3|3	0.247|0.658	1.14	1.230|1.053	0.016	4|4	0.139|0.731	0.8	0.776|0.833	0.002	4|3	0.090|0.498	0.9	1.030|0.771	0.034	4|4	0.925|0.160	CL1093.Contig2_17	MCAAHSNPQQGFGYTWGFADNTRTESVLEIPANINYTVSSESMPYLLSTDGSLTVQKDVKGGLTAQKGGVVRRMFVVNEPFAPGPQRVITAGTTTPSVVKKQDQQVLSINCDKNYLLVDQSDQSHSLTNGIVDTKSQTILTTTAGAKTHFSPIGPIHLTAEECNEILMKRALAASQQTHTITTADGHGTTSDILPGISVQVQKVIQGLEEADDSQGDTPNLKLEPGTLELSPKTELQDNMNYNENDATVKKERPYSCDECGKSFLLKHHLTTHARVHTGERPHVCVHCSKSFAHKHCLNTHLLLHSTDRPFQCTECKKSFTLKHHLLTHSRVHSRDRPFVCPECGRTFPLKRHLVTHSKFHAGERPYVCEECGESFAQENHLIMHSRFHGSLNPFVCPD…	74.35	0.0	gi|195383986|ref|XP_002050705.1|	GJ20060 [Drosophila virilis]	31.67	2e-62	sp|Q14587|ZN268_HUMAN	Zinc finger protein 268 OS=Homo sapiens GN=ZNF268 PE=1 SV=2	74.35	0.0
107	Unigene14372_17	odorant-binding protein [Culex quinquefasciatus]	27432.485242	0.380	8	84	-	1.17	1.162|1.174	0.000	84|84	0.004|0.007	1.57	1.565|1.570	0.000	84|84	0.001|0.001	1.57	1.622|1.513	0.006	84|84	0.001|0.001	0.74	0.777|0.702	0.003	82|80	0.001|0.001	2.06	1.963|2.158	0.019	84|84	0.000|0.000	1.31	1.301|1.322	0.000	82|78	0.001|0.001	Unigene14372_17	LLLILLLGVNAYDFDDSVFNEYLFKELQSHYEEDQVYPHRARREATDAADAKECSKRNWKKDMQCCKGGNVIGDQLELFKSVKKQCIADLKGEPADDAFDPFDCEKMQQVKEQMICITECIAKKFKSLDENGELQRDAILEGLRAQIGTVQWKVDAIEGYVDKCLAEVKEKLDQKKKAGELKEGGCSRSPLAFHSCMWRQFWNGCPADLRVDSPKCNKLRERVANGDTRFFGKH	31.82	3e-25	gi|108878137|gb|EAT42362.1|	AAEL006106-PA [Aedes aegypti]	-	-	-	-	31.82	9e-25
108	CL2697.Contig1_17	GI15893 [Drosophila mojavensis]	383667.688210991	0.157	1	3	-	2.19	2.273|2.099	0.015	3|3	0.001|0.003	1.95	1.977|1.915	0.002	3|3	0.004|0.009	3.81	3.891|3.719	0.015	3|3	0.001|0.001	0.57	0.552|0.595	0.001	3|3	0.006|0.017	3.22	3.209|3.239	0.000	3|3	0.000|0.001	0.89	0.904|0.866	0.001	3|3	0.781|0.551	CL2697.Contig1_17	IDEGSGDDYGISTDRSTVFTDAGCRGDATYTCSKSGYRICDEQRCDDREDCPDGEDEENCGVSVGGGDEDLAGRGEDDGGYEHVCSDSEFKCDGRCLPLDYKCNGREECLDATDELNCPVDKPEVCQPDQYRCRAGNCIDSARRCDRVRDCPDGDDEDASCRCAVNQFRCRNGDCVSGNAQCNGYQDCRDGSDEEDCSEPAYVVPCSGSQFRCNNGQCINAAARCDGYTDCADSSDEISCRALDLPASNPELNLKTYPESQIIKESREVIFRCRDEGPLRARVKWTRPGGRPLPIGSRDNGDGRLEIPNIRVEDSGQYICEAAGYPRHVSGQQVTVHLTVEKLNPDNERPPTACRAYQATCRDNQCIDKSQICDGTPHCSDGSDEESCSHGLKCQPNQF…	58.20	0.0	gi|195448993|ref|XP_002071901.1|	GK24915 [Drosophila willistoni]	28.79	0.0	sp|P98160|PGBM_HUMAN	Basement membrane-specific heparan sulfate proteoglycan core protein OS=Homo sapiens GN=HSPG2 PE=1 SV=4	58.20	0.0
109	Unigene29329_17	GI18035 [Drosophila mojavensis]	15179.92189	0.068	1	1	-	0.73	0.773|0.684	0.004	1|1	0.709|0.523	0.91	0.988|0.830	0.012	1|1	0.992|0.829	0.89	0.972|0.807	0.014	1|1	0.976|0.784	0.82	0.846|0.788	0.002	1|1	0.785|0.618	1.11	0.986|1.234	0.031	1|1	0.988|0.786	1.22	1.238|1.207	0.000	1|1	0.765|0.787	Unigene29329_17	ETKGIIKEQLGFQSQFNCNVKGHLTEFVVHSFTNKCVILVTQYGGLPNLYTVQFDINNERDRRISPLNISELHTSVPATMKCLLGVDKMEVRAGIQFLINRTKLSQCKTDILITLGLRETNGDVLKEIADILD	44.27	2e-27	gi|195118266|ref|XP_002003661.1|	GI18035 [Drosophila mojavensis]	-	-	-	-	44.27	8e-27
110	Unigene30083_17	GJ16336 [Drosophila virilis]	35152.785903	0.113	2	4	-	1.1	1.075|1.131	0.002	4|4	0.856|0.777	0.84	0.793|0.894	0.005	4|3	0.149|0.744	1.09	1.036|1.137	0.005	4|4	0.889|0.531	1.02	0.997|1.033	0.001	4|4	0.993|0.906	0.78	0.853|0.705	0.011	4|3	0.326|0.128	0.71	0.671|0.744	0.003	3|4	0.055|0.375	Unigene30083_17	MHKVQLLCVITVALIAILLQCKCQAALPRGSNVQLDALKNQFLPAEYKNRNFTVDELKKVLREKCRKAAGGEENSTLYQEIEKASTVLTSCLAGLANLTALQQEIEAARPIGELDTVFNKYCDKAPAATNCLRDFNAKVQPCLRAKEKQQNVVLMRIVTGLIDFMCTRGGDHIALFVAEEGPECLEANREAINMCLNSSFHEFLPKDIKVPDLFDLPDLVLEPGHCVDLERFESCTIHHLEQCREITPANVAESVFKYIKNETSCNQYMQAKTNQRPILMKASAGDGGGTKQASNVFILLLGSSLMLFVG	53.05	2e-91	gi|195438806|ref|XP_002067323.1|	GK16360 [Drosophila willistoni]	33.49	5e-30	sp|P83632|P27K_GALME	27 kDa hemolymph protein OS=Galleria mellonella PE=1 SV=1	53.05	6e-91
111	Unigene15671_17	GJ11862 [Drosophila virilis]	62438.4177200001	0.157	7	37	-	1.04	1.011|1.064	0.001	32|37	0.847|0.074	1.11	1.101|1.119	0.000	34|37	0.012|0.019	1.15	1.231|1.073	0.012	33|36	0.001|0.057	0.92	0.938|0.907	0.000	33|35	0.138|0.025	1.17	1.117|1.215	0.005	37|35	0.001|0.000	1.03	1.045|1.024	0.000	37|37	0.388|0.727	Unigene15671_17	MAKLFVVFAILAVTTATVSADRVRRQTATEEPKKEESFEKELCKDKDAGEWFRLVAGEGDNCRDVIQCTSSGLQAIRCPAGLYFDIEKQTCDWKESVKNCKSKNKERRVKPLLHTDEPLCQDGFLACGDGNCIERGLFCNGEKDCSDGSDENTCDIDNDPNRAPPCDPTVCVLPDCFCSEDGTSIPGDLPAKDVPMMITITFDDAINNNNIDLYKEIFKGRKNPNGCDIKASYFISHKYTNYSAVQETARKGHEIAVHSITHNDEERFWSNATVDDWAKEMAGMRIIIEKYANITDNSVVGVRAPYLRVGGNNQFTMMEEQAFLYDSTITAPLSNPPLWPYTMYFRMPHRCHGNLQSCPTRSHAVWEMVMNELDRREDPANDEYLPGCAMVDSCSNILT…	95.17	0.0	gi|195127997|ref|XP_002008453.1|	GI13501 [Drosophila mojavensis]	46.30	2e-06	sp|P98167|SSPO_BOVIN	SCO-spondin OS=Bos taurus GN=SSPO PE=2 SV=2	95.17	0.0
112	Unigene14483_17	GF15932 [Drosophila ananassae]	26415.695127	0.491	7	23	-	0.87	0.893|0.854	0.001	22|22	0.054|0.001	1.08	1.130|1.025	0.006	22|22	0.023|0.733	0.99	0.991|0.993	0.000	18|23	0.854|0.931	0.88	0.876|0.893	0.000	23|22	0.001|0.008	1.2	1.159|1.242	0.003	22|23	0.001|0.001	1.18	1.215|1.145	0.002	23|21	0.001|0.003	Unigene14483_17	MSFLARTLFRKVPTFCQKASSQQKAASRLLHQTAPLLAVKVQRPAPDFKGLAVVGNDFQEIKLADFRGKYLVLFFYPLDFTFVCPTEIIAFSERIEEFKKLNAEVVGVSVDSHFSHLVWCNSDRKDGGLGGLSYPLLSDLTKKISNDYDVLLDNEGISLRGTFIIDPNGIVRQYSINDLPVGRSVDEVLRLIKAFQFVDEHGEVCPANWHPEKNPDTIKPDVVDSKEYFKKH	78.45	1e-98	gi|125773251|ref|XP_001357884.1|	GA19159 [Drosophila pseudoobscura pseudoobscura]	62.62	8e-67	sp|P20108|PRDX3_MOUSE	Thioredoxin-dependent peroxide reductase, mitochondrial OS=Mus musculus GN=Prdx3 PE=1 SV=1	78.45	4e-98
113	Unigene14990_17	GI23609 [Drosophila mojavensis]	24017.606103	0.102	1	1	-	1.41	1.554|1.257	0.044	1|1	0.496|0.745	1	1.104|0.901	0.021	1|1	0.898|0.917	1.23	1.309|1.150	0.013	1|1	0.735|0.866	1.15	1.113|1.181	0.002	1|1	0.881|0.748	0.88	0.824|0.942	0.007	1|1	0.797|0.950	0.72	0.740|0.705	0.001	1|1	0.627|0.581	Unigene14990_17	MSRYIYQSLNSFLNRLEKIIFLGHRGQPPMELALAGVPSVGLNTPVDIPDIRKSDRFSLKNLLGDGILWAVPKHRRTIEKRLNRKFGMPGYNWKPLVAKTTLRSCNQCGHDHELGVLCPHCYKKVEQETRLMQEKIEQKLGLEPIEHEVIVLYQGEQIEKVENEANERKVRIVEMEKPRPVWFSKNLMQKTTAQPADTKEVKPSNL	59.22	3e-61	gi|195388634|ref|XP_002052984.1|	GJ23582 [Drosophila virilis]	57.77	1e-61	sp|Q9V9Z1|RM32_DROME	39S ribosomal protein L32, mitochondrial OS=Drosophila melanogaster GN=mRpL32 PE=2 SV=1	59.22	9e-61
114	Unigene14330_17	GD11158 [Drosophila simulans]	22005.357785	0.427	4	14	-	1.54	1.400|1.683	0.040	17|13	0.001|0.001	1.16	1.116|1.208	0.004	17|14	0.151|0.001	1.37	1.358|1.381	0.000	15|15	0.001|0.001	1.15	1.173|1.128	0.001	17|17	0.005|0.005	1.01	0.956|1.056	0.005	17|15	0.696|0.439	0.75	0.825|0.668	0.012	13|15	0.015|0.001	Unigene14330_17	MTTIRKKLVIVGDGACGKTCLLIVFSKDQFPEVYVPTVFENYVADIEVDGKQVELALWDTAGQEDYDRLRPLSYPDTDVILMCFSVDSPDSLENIPEKWTPEVKHFCPNVPIILVGNKKDLRNDPNTIRDLAKMKQEPVKPQEGRAMAEKINAFAYLECSAKSKEGVRDVFETATRAALQVKKRKKTKCLLL	99.48	9e-109	gi|17137100|ref|NP_477098.1|	Rho1, isoform A [Drosophila melanogaster]	99.48	1e-109	sp|P48148|RHO1_DROME	Ras-like GTP-binding protein Rho1 OS=Drosophila melanogaster GN=Rho1 PE=1 SV=1	99.48	3e-108
115	Unigene32806_17	GI23552 [Drosophila mojavensis]	53486.9143910001	0.109	4	6	-	1.24	1.283|1.196	0.004	5|5	0.065|0.239	0.91	0.923|0.887	0.001	5|5	0.706|0.448	1.09	0.924|1.260	0.056	6|4	0.861|0.138	1.03	0.956|1.100	0.010	5|6	0.866|0.873	0.81	0.944|0.685	0.034	6|6	0.648|0.197	0.74	0.738|0.743	0.000	6|4	0.005|0.073	Unigene32806_17	LFNKLKSYLYGNGGPIIMVQVENEYGSYYACDKNYRTWLRDETLVHVQDNAVLFTNDGPSVLGCGHIEGVLATMDFGATNQISNYWAQLRQIQPKGPLVNAEFYPGWLTHWSEPMARVRTETILKPFIEMLDVGASVNFYMMFGGTNFGFTSGANDGGPGRYQPDITSYDYDAPMNEAGDTTEKYYKLREIIGRYLSLPNIPIPAPTTKKSYGTIRLNACCSILSAKGREILSTGVVFDTHPKTFESLDQYSGFVLYETLLPTFKRDPSILRASGVHDRAYVLIDDQLVGILSRETPIYELPISPTYGKRLQMLVENQGRINFGPITDFKGITSNVTLDKNVLTNWTMTKYPLQSIEDIETLIALVNADDVNVIRCFREEKGGSILRSGPTIYYGQLTI…	64.51	0.0	gi|195108029|ref|XP_001998595.1|	GI23552 [Drosophila mojavensis]	43.06	2e-100	sp|Q5R7P4|BGAL_PONAB	Beta-galactosidase OS=Pongo abelii GN=GLB1 PE=2 SV=1	64.51	0.0
116	Unigene20051_17	1 87 minus strand IP01764p [Drosophila melanogaster]	3593.758152	0.379	1	4	-	0.89	0.801|0.978	0.016	4|4	0.175|0.933	0.94	0.915|0.969	0.001	3|4	0.813|0.928	0.94	0.888|0.991	0.005	4|4	0.484|0.964	0.96	1.037|0.877	0.013	3|3	0.906|0.425	0.98	0.981|0.969	0.000	4|4	0.949|0.932	1.01	1.067|0.957	0.006	4|3	0.838|0.896	Unigene20051_17	CKTSNEMLLEIFRFVQAEAQLFLDCKHRE	93.10	1e-08	gi|195440780|ref|XP_002068218.1|	GK12849 [Drosophila willistoni]	93.10	3e-09	sp|P61855|AKH_DROME	Adipokinetic hormone OS=Drosophila melanogaster GN=Akh PE=1 SV=1	93.10	5e-08
117	CL1157.Contig1_17	H(+)-transporting ATPase [Manduca sexta]	54796.046795	0.267	9	31	-	1.37	1.365|1.379	0.000	29|31	0.001|0.001	1.2	1.188|1.212	0.000	27|31	0.001|0.002	1.52	1.520|1.515	0.000	29|31	0.001|0.001	0.91	0.888|0.934	0.001	29|27	0.002|0.026	1.23	1.202|1.250	0.001	25|29	0.000|0.000	0.84	0.853|0.831	0.000	31|30	0.001|0.001	CL1157.Contig1_17	SISAKQANREHALAVSRDFISQPRLTYKTVSGVNGPLVILDEVKFPKFAEIVQLRLADGTLRSGQVLEVSGSKAVVQVFEGTSGIDAKNTVCEFTGDILRTPVSEDMLGRVFNGSGKPIDKGPPILAEDFLDIQGQPINPWSRIYPEEMIQTGISAIDVMNSIARGQKIPIFSAAGLPHNEIAAQICRQAGLVKVPGKSVLDDHEDNFAIVFAAMGVNMETARFFKQDFEENGSMENVCLFLNLANDPTIERIITPRLALTAAEFLAYQCEKHVLVILTDMSSYAEALREVSAAREEVPGRRGFPGYMYTDLATIYERAGRVEGRNGSITQIPILTMPNDDITHPIPDLTGYITEGQIYVDRQLHNRQIYPPVNVLPSLSRLMKSAIGEGMTRKDHSDV…	97.76	0.0	gi|401327|sp|P31401.1|VATB_MANSE	RecName: Full=V-type proton ATPase subunit B; Short=V-ATPase subunit B; AltName: Full=Vacuolar proton pump subunit B	97.76	0.0	sp|P31401|VATB_MANSE	V-type proton ATPase subunit B OS=Manduca sexta GN=VHA55 PE=2 SV=1	97.76	0.0
118	CL2204.Contig1_17	GI21964 [Drosophila mojavensis]	49174.0053990001	0.415	12	57	-	0.8	0.787|0.818	0.000	57|53	0.001|0.001	0.96	0.941|0.985	0.001	56|55	0.086|0.874	0.89	0.900|0.886	0.000	55|55	0.003|0.001	0.89	0.881|0.892	0.000	55|56	0.002|0.001	1.11	1.185|1.043	0.010	56|55	0.000|0.287	1.21	1.140|1.283	0.010	55|56	0.001|0.001	CL2204.Contig1_17	NHYSTIPIREITHPLQRKPNIVSPAEAVACIKSGDTVFASGAAATPIDMLKALTKHGQQNKLKNVTVCHMHTEGPADYCAPENKDIFRSNSFFMGANVRKAVAEGRGDNLSIFLHEIPQLFYRGIVRPDVAIVHVSPPDRHGFCSLGTSIDCVRAASNHSKMIIAQINKQMPRTFGDACIHSSQFDFAVEVDSPLPQHGGKPPSEVENKIGKLIAENLICNGATLQMGIGNIPDAVLNACHNHKDLGIHSEMFANGVVELVRKGCVNNSKKKMHQGRIVGSFLIGNQALYDFVNDNPFIEMYGIDYVNSTGIIKQQPIMTAINSAIEVDLTGQVSSDSIGTRFFSGFGGQVDFIRGAAEGLDGKGVPIIALPSVTNKGQSKIVPLLQPGAGVVTSRAHV…	78.35	0.0	gi|195113803|ref|XP_002001457.1|	GI21964 [Drosophila mojavensis]	47.03	4e-101	sp|P38942|CAT2_CLOK5	4-hydroxybutyrate coenzyme A transferase OS=Clostridium kluyveri (strain ATCC 8527 / DSM 555 / NCIMB 10680) GN=cat2 PE=3 SV=3	78.35	0.0
119	Unigene5915_17	GJ22871 [Drosophila virilis]	22884.797451	0.115	1	1	-	0.86	0.846|0.875	0.000	1|1	0.878|0.873	0.59	0.764|0.409	0.063	1|1	0.670|0.267	0.63	0.182|1.079	0.402	1|1	0.054|0.929	2.2	0.642|3.757	4.852	1|1	0.567|0.025	0.6	0.882|0.321	0.157	1|1	0.890|0.133	0.92	0.914|0.922	0.000	1|1	0.899|0.948	Unigene5915_17	GWKDKTVIVQGFGNVGSHASVFVVEAGAKLIGVQEVDVSLVNENGIDPKDLMEYYAKNKKSIKGYTKATEKSGSLLGEKCDILMPCATQKVLTPENANSVQAKMILEGANGPSTPAADEILRKKNVLIIPDMYCNAGGVTVSYFEYLKNINHVSYGKMNVKREKAIISEIFNSINEGNAKFKPNKKLELIRDCTKEAEIVDAGLQTVM	66.98	4e-77	gi|195391326|ref|XP_002054311.1|	GJ22871 [Drosophila virilis]	54.24	1e-49	sp|P54385|DHE3_DROME	Glutamate dehydrogenase, mitochondrial OS=Drosophila melanogaster GN=Gdh PE=1 SV=2	66.98	2e-76
120	CL117.Contig2_17	GA25805 [Drosophila pseudoobscura pseudoobscura]	111294.119058	0.057	4	5	-	1.42	1.330|1.505	0.015	3|5	0.201|0.014	1.31	1.311|1.307	0.000	4|5	0.085|0.081	1.4	1.258|1.551	0.043	4|4	0.152|0.013	0.89	0.872|0.898	0.000	5|5	0.342|0.567	1.35	1.330|1.361	0.000	4|5	0.062|0.089	0.91	0.985|0.837	0.011	4|5	0.964|0.164	CL117.Contig2_17	KPIEKVEEQKIVEEVEEVRTIVEQPIEPVKEEPKETDQKPNEVIASVHLSADEKFIVSEEINFKPIEERPKKKVVTFEDDSSHKREEVEPVDSFVSYENVQLTPEVVHYPVSNFSEKISIGESELLTMPKWSDGKPLQEEKTVIDTWSSVLEDTSPISPNIAFTSKLSPDAPEFTPSYLRQAESDQNILFLEGEKNTSVAGHKHYEKVQKRSKHQKREENLRNVDTEDKYNDKPLQLNVDAAVFKVSDDARDLSTLRGKSYADIVFGDHLHMEEAKGSLSVVENRAVPVEKAIEKVIPLESIKPKEEKEKKTKKEKHRTEQVVKEIEPTVEEVPEKETHNIEENLKPTVSDLPQTEPDRPHTPLLSWSSIVKKPGEWVDDVVSKTKKVLVDNDKKASVT…	33.09	9e-18	gi|195437270|ref|XP_002066563.1|	GK24498 [Drosophila willistoni]	-	-	-	-	33.09	3e-17
121	Unigene6717_17	171 653 uncharacterized conserved protein [Glossina morsitans morsitans]	19008.682301	0.093	1	1	-	0.92	0.916|0.931	0.000	1|1	0.924|0.936	1.14	1.004|1.268	0.035	1|1	0.995|0.793	0.83	0.821|0.837	0.000	1|1	0.834|0.826	1.17	1.184|1.165	0.000	1|1	0.828|0.782	0.98	1.050|0.912	0.010	1|1	0.961|0.922	1.21	1.077|1.340	0.035	1|1	0.919|0.706	Unigene6717_17	MLRQLLTQGSRRTMLRMRAFSSKVTIGDDKDKVKVLNNADVPIIDYDDPDYLPLPEYPLRPDEPLEVRKQRLIYQSRKRGMLENDLILSTFVARYLKDMDATLTAQYDQLINGVTNDWDIYYWATNVKPTPPEHDNDVMRLLKEHVANSRHEQRLCQPDLY	64.20	4e-40	gi|195120854|ref|XP_002004936.1|	GI20197 [Drosophila mojavensis]	64.20	6e-41	sp|B4KN44|SDF2A_DROMO	Succinate dehydrogenase assembly factor 2-A, mitochondrial OS=Drosophila mojavensis GN=GI20197 PE=3 SV=1	65.27	3e-43
122	Unigene26104_17	SUN domain-containing protein 1 [Dictyostelium discoideum AX4]	12369.230617	0.170	1	1	-	1.17	1.162|1.176	0.000	1|1	0.844|0.835	0.92	1.027|0.803	0.025	1|1	0.982|0.798	1.06	0.942|1.183	0.029	1|1	0.955|0.838	1.12	1.006|1.225	0.024	1|1	0.995|0.685	0.83	0.814|0.845	0.000	1|1	0.787|0.843	0.79	0.894|0.676	0.024	1|1	0.881|0.535	Unigene26104_17	VDHDNSNVGSASVEDIADEDATTQASPILARETLSHLRLSSADVDADAVLMDSLEKRLWQQLVLSKQQYQRQQQQRVRRQQQEQHQRQHRRRQRQNKKSRNSADNH	-	-	-	-	-	-	-	-	-	-
123	Unigene7209_17	GH20521 [Drosophila grimshawi]	28467.306388	0.051	1	8	-	1.41	1.336|1.480	0.010	8|8	0.016|0.002	1.95	1.617|2.280	0.220	8|6	0.001|0.001	1.77	1.713|1.826	0.006	8|6	0.001|0.001	0.84	0.838|0.840	0.000	8|7	0.027|0.012	2.2	2.312|2.090	0.025	8|7	0.000|0.000	1.31	1.262|1.365	0.005	8|8	0.005|0.002	Unigene7209_17	MARRYDSRTTIFSPEGRLYQVEYAMEAISRAGAALGIRAEDGIVIAAECHTTSPLLDNDIFQDKIYKINDHLCVAVAGITSDANVLVNEMRLIAQRYQYNYGAPIPVEQLVSHLCDIKQAYTQYGGKRPFGVSILYMGHDRRHGFQLYQSDPSGNYSGWNGTCIGKSFGVAMSMLKTELANRYDNAGNPLTTEEAKKIAIKVLAKSMEGINAEKVEMAVTTLGSNSRPIIKMVQKAEIAQLITKHNEEEEEKKAS	65.06	1e-89	gi|195027167|ref|XP_001986455.1|	GH20521 [Drosophila grimshawi]	63.05	1e-87	sp|P18053|PSA4_DROME	Proteasome subunit alpha type-4 OS=Drosophila melanogaster GN=Pros29 PE=1 SV=2	65.06	4e-89
124	CL1646.Contig2_17	GJ24408 [Drosophila virilis]	56662.1516960001	0.541	19	145	CL1646.Contig5_17;CL1646.Contig1_17;CL1646.Contig3_17	1.34	1.340|1.349	0.000	142|140	0.001|0.001	1.28	1.197|1.356	0.013	141|144	0.001|0.001	1.52	1.625|1.411	0.023	141|136	0.001|0.001	0.87	0.913|0.828	0.004	139|139	0.001|0.001	1.4	1.381|1.425	0.001	141|141	0.000|0.000	0.94	0.930|0.957	0.000	142|137	0.002|0.099	CL1646.Contig2_17	NEVPQNMAAEAETHLDHMCRLQFDSAVPHVRLSGVVCTIGPASRSVEMLEQMMETGMNIARMNFSHGSHEYHAETVANVRAAAKNYSAKIGYEYPIAIALDTKGPEIRTGLIEGSGTGEVELKRNETIKLSTDPAYLEKGNKDTIFVDYANIVKVVKPGNRVFVDDGLISLIVKEVNSNALVCQIENGGALGSRKGVNLPGVPVDLPAVSEKDKSDLKFGVEQKVDMVFASFIRNAAALTEIRGVLGEEGKNIKIISKIENQQGMHNLDEIIEASDGIMVARGDLGIEIPPEKVFLAQKAMIARCNKAGKPVICATQMLESMVKKPRPTRAEISDVANAILDGADCVMLSGETAKGEYPLECVLTMAKTCKEAEAALWHRNLFADLVRAAHTSTLDSPH…	85.74	0.0	gi|195391442|ref|XP_002054369.1|	GJ24408 [Drosophila virilis]	83.43	0.0	sp|O62619|KPYK_DROME	Pyruvate kinase OS=Drosophila melanogaster GN=PyK PE=2 SV=2	85.74	0.0
125	Unigene14862_17	252 1043 minus strand fat body serine protease [Glossina morsitans morsitans]	29317.062045	0.375	7	62	-	0.92	0.920|0.928	0.000	62|61	0.495|0.481	0.92	0.941|0.897	0.001	51|53	0.105|0.003	0.93	0.924|0.944	0.000	62|62	0.322|0.490	1	1.000|1.002	0.000	60|61	0.996|0.971	1.01	1.010|1.018	0.000	58|57	0.910|0.787	1.12	1.137|1.103	0.001	57|60	0.005|0.023	Unigene14862_17	AQRAAVKTCETLDNGLQHNLIPHAPEGSAAEPGKYPYMALIGHQRENDTVVFPCSGALIDKRFILTAAHCIKNGKPSIVRLGITSLDNLEQSSGIIEKNIKAIHLHPNYSSASAYNDIGLVELDSDVNYSPLVYPVCLFTAAAIPLNNTELYATRWGVNGQRIVGAARVRILPVPLCRDAYSKFVNRIIADGIRTTQLCAHDVNASENECSVASGPLILVEDESLNKYRLVGIDSFGPRCRSQLPIVLTRVSEYLNFIESIVWP	36.13	7e-40	gi|195481346|ref|XP_002101613.1|	GE15526 [Drosophila yakuba]	34.05	3e-33	sp|Q9VWU1|PSH_DROME	Serine protease persephone OS=Drosophila melanogaster GN=psh PE=1 SV=1	39.78	2e-45
126	CL3591.Contig1_17	GK16393 [Drosophila willistoni]	11128.308931	0.128	1	2	Unigene15773_17	0.81	0.822|0.802	0.000	2|2	0.678|0.604	0.78	0.836|0.714	0.007	2|2	0.724|0.459	0.8	0.723|0.874	0.011	2|2	0.447|0.797	1.02	0.917|1.122	0.021	2|2	0.851|0.748	0.76	0.788|0.738	0.001	2|2	0.581|0.505	0.94	0.992|0.888	0.005	2|2	0.989|0.810	CL3591.Contig1_17	PTTTSKYVGIKCPVCNKFVLPDDIECHLVMCLTKPRLSYNEDILSDAKGECVICLEDLNPGDIIARLPCLCIYHKGCIDRWFEVNRSCPEHPGD	89.36	3e-49	gi|195340221|ref|XP_002036714.1|	GM12546 [Drosophila sechellia]	73.86	1e-35	sp|Q8NHG8|ZNRF2_HUMAN	E3 ubiquitin-protein ligase ZNRF2 OS=Homo sapiens GN=ZNRF2 PE=1 SV=1	89.36	1e-48
127	Unigene17651_17	GF16318 [Drosophila ananassae]	125889.879162	0.016	1	1	-	1.27	1.118|1.430	0.049	1|1	0.893|0.557	1.07	0.966|1.179	0.023	1|1	0.976|0.861	1.34	1.294|1.395	0.005	1|1	0.750|0.624	0.95	1.040|0.861	0.016	1|1	0.959|0.785	1.12	1.130|1.107	0.000	1|1	0.894|0.913	0.83	0.863|0.800	0.002	1|1	0.845|0.746	Unigene17651_17	EEEAVTAIADKDLHGAIPAEDIELQQHIDEDEEGKVSTDKPEIEAEQPVEGAPADQVTTSTPDVAAIGATETAVTAESEEAQKEEGIKDIERVTTVKSEVSTEVAVEEQKTEDESTSTEAAEHVYETTPGPDGTKRIGIDVDKHDEATAGPVAEKETSTVPSIHVEHEPMVEIDGRIDTETGKPISDEAATTVQPAIAEIPATVSIPTKADKESSEGTSAETVESEESTETSEEPIAPHEKSTTTQRPFVEKESAEESTEVAEQEAITKQPIIVVSEGEAEKPTESETEVSKESSDESTESTEAEVSTQQSTEVASSEEEVPDMQLPAVIPGEGDCLVGHRTYKNNTIIPTADDCDISCKCISSIVVCQKVECDVPADISRCVIDQASSNKCCPKYICE…	49.62	4e-29	gi|195453330|ref|XP_002073741.1|	GK12979 [Drosophila willistoni]	-	-	-	-	49.62	1e-28
128	Unigene32834_17	GI16558 [Drosophila mojavensis]	22439.469941	0.237	4	9	-	1.01	1.059|0.958	0.005	9|9	0.471|0.629	0.97	0.994|0.943	0.001	9|8	0.978|0.600	1.28	1.273|1.280	0.000	9|8	0.001|0.003	0.78	0.763|0.802	0.001	9|8	0.003|0.007	1.22	1.258|1.172	0.004	9|9	0.008|0.030	0.97	0.938|1.005	0.002	9|9	0.462|0.977	Unigene32834_17	ATGPRPLVLCGPSGSGKSTLLKRLFEEYPNTFGFSISHTTRTPRAGEQHGKHYYFIEEQMMRDKITNDEFIETATFSGNMYGTSKAAVREIQSAGKVCVLDIEPQGVEQIKQTDLNPILVFNNPPTIKDLELRLRKRQSETEETLQKRLAAAESEIAYGLRHGNFHKIIHNVEIDAAYAEFKEFILSELKKQEAQGVQ	74.75	3e-86	gi|195135583|ref|XP_002012212.1|	GI16558 [Drosophila mojavensis]	54.12	7e-58	sp|Q64520|KGUA_MOUSE	Guanylate kinase OS=Mus musculus GN=Guk1 PE=1 SV=2	74.75	9e-86
129	Unigene443_17	GJ16723 [Drosophila virilis]	21719.984888	0.428	6	47	-	0.59	0.607|0.575	0.001	45|47	0.001|0.001	0.62	0.659|0.573	0.004	47|47	0.001|0.001	0.93	0.907|0.957	0.001	47|44	0.059|0.264	0.62	0.582|0.658	0.003	47|46	0.001|0.001	0.96	0.970|0.957	0.000	46|45	0.713|0.434	1.04	1.058|1.028	0.000	46|46	0.099|0.663	Unigene443_17	RPSAIKDDFLPLPPRRPSVDNKEDFPPLPTPRTPGSPTPASPLRPSSPGGGAQPTPNFAWGTPTPAAPARPGSGIITPASPTPNSPTRPGTPGAGGSGVSFVPHVPGPSTTAKPGAGSSTSASLASDDEIRALTEQLFTKEQGLLNLVHVNPQGKTRSIDSTDEAPKPLFEVEPRAYDSPTVAKMRALFDNYEEDTLANEHVTVNERR	53.62	4e-32	gi|195432134|ref|XP_002064081.1|	GK19979 [Drosophila willistoni]	61.45	7e-22	sp|Q9VZ49|ENDOU_DROME	Poly(U)-specific endoribonuclease homolog OS=Drosophila melanogaster GN=CG2145 PE=1 SV=1	53.62	1e-31
130	Unigene29941_17	GK11034 [Drosophila willistoni]	96905.8299529997	0.014	1	1	-	0.78	0.982|0.576	0.082	1|1	0.982|0.328	0.75	0.897|0.604	0.043	1|1	0.881|0.467	0.69	0.704|0.671	0.001	1|1	0.639|0.538	1.11	0.850|1.379	0.140	1|1	0.799|0.455	0.69	0.727|0.653	0.003	1|1	0.638|0.520	0.99	0.906|1.075	0.014	1|1	0.894|0.926	Unigene29941_17	VLQRLLGGDTPPNKVLEIKGESLGSLLVIGRDEGMVLYSPPFNSTDRKACYEIVLQRHVNDPVNTCFSLFRSTVQQEAEDRFNAFVHRLPVFVSIVKEFFNVNGIQRVCDALAENPSWSLAHLVAYFNLVDYVSNPKVLEFIDYADHVHLMSPFQLAIKTGNIEMVKTLMPLCKMEHLDNNSNSVFHYAASTTKEIINLLTSKSTENLNHINSDGYPPLHLACLSDKPECVKALLLAGADVNLNAKNMSKIYKSSTPTSVAEFLKTNANKLYTQDMKYGGTPLHWCSSRETLHALIMQGCDVNATNFDGRTALHVMIARNRFECVVTLLAHDADIDVFDKDGNTALHIAIEKKLVPIVQCLVVFGCDINMKNKDGKTPRHIVGTDSNGDKDSEILYILH…	79.91	0.0	gi|195375275|ref|XP_002046427.1|	GJ12510 [Drosophila virilis]	50.00	8e-91	sp|P97570|PLPL9_RAT	-	79.91	0.0
131	CL622.Contig1_17	plasma membrane calcium ATPase, isoform R [Drosophila melanogaster]	133690.590807999	0.032	3	3	CL622.Contig2_17	1.28	1.253|1.303	0.001	3|3	0.338|0.294	1	1.046|0.962	0.004	3|3	0.925|0.934	1.29	1.217|1.367	0.011	3|3	0.584|0.266	1.02	0.983|1.062	0.003	3|3	0.963|0.767	0.99	0.977|0.998	0.000	3|3	0.954|0.996	0.81	0.887|0.739	0.011	3|3	0.715|0.502	CL622.Contig1_17	MATIDGRPTQYGISLKQLRELMEHRGREGVVKLSEVGSVNKLCDKLYTSSNDGLRGTRSDIEHRRETFGSNVIPPKPPKTFLTLVWEALQDVTLIILEVAALVSLGLSFYKPADEDAPVLQEEEDHHGWIEGLAILISVIVVVFVTAFNDYSKERQFRGLQNRIEGEHKFSVIRGGDVCQISVGDIVVGDIAQIKYGDLLPADGILIQSNDLKVDESSLTGESDHVKKGIDVDPMVLSGTHVMEGSGKMVVTAVGVNSQAGIIFTLLGAAVDEQEAELKKRKKEAKKARKQSKSLTGADDGRVPIKNMHMSPPTDGIKSESDGNHVQQASSPAEASHKKEKSVLQAKLTKLAIQIGYAGSTIAVLTVIILVIQFCIKTFVIEEKQWKNTYANNLVKHLI…	92.16	0.0	gi|320541591|ref|NP_001188517.1|	plasma membrane calcium ATPase, isoform R [Drosophila melanogaster]	65.02	0.0	sp|Q16720|AT2B3_HUMAN	Plasma membrane calcium-transporting ATPase 3 OS=Homo sapiens GN=ATP2B3 PE=1 SV=3	92.16	0.0
132	CL1803.Contig2_17	127 1098 minus strand annexin B9a [Drosophila melanogaster]	36448.338116	0.222	6	20	CL1803.Contig1_17	2.19	2.281|2.092	0.018	20|20	0.001|0.001	1.69	1.682|1.705	0.000	18|20	0.001|0.001	2.64	2.565|2.712	0.011	20|20	0.001|0.001	0.84	0.780|0.892	0.006	20|20	0.003|0.146	2	2.106|1.897	0.022	20|20	0.000|0.000	0.78	0.775|0.786	0.000	20|19	0.001|0.001	CL1803.Contig2_17	MSSAEYYPFKCTPTVYPADPFDPVEDAAILRKAMKGFGTDEKAIIEILARRGIVQRLEIAEAFKTSYGKDLLSELKSELSGKFENVIVALMTPLPQFYANELHDAISGLGTDEEAIIEILCTLSNYGIKTIAQFYEQSFGRSLESDLKGDTSGHFKRLCVSLVQGNRDENQGVDEAAAVADAQSLHEAGEGQWGTDESTFNSILITRSYQQLRQIFLEYENISGNDIEKAIKREFSGSVERGFLAIVKCCKSKVDYFAERLYESMHGLGTKDKTLIRIVVSRSEIDLGDIKEAFQNKYGKSLESWIKEDSQSEIGFVLVTMVAW	92.28	2e-164	gi|10121901|gb|AAG12161.1|	annexin B9a [Drosophila melanogaster]	91.98	5e-165	sp|P22464|ANXB9_DROME	Annexin-B9 OS=Drosophila melanogaster GN=AnnIX PE=2 SV=2	89.51	1e-162
133	Unigene32682_17	GF16575 [Drosophila ananassae]	39017.38071	0.064	2	4	-	0.97	0.955|0.981	0.000	3|4	0.879|0.941	0.97	1.084|0.847	0.028	3|4	0.834|0.428	0.82	0.708|0.941	0.027	4|4	0.046|0.754	1.14	1.055|1.221	0.014	4|4	0.789|0.435	0.79	0.817|0.757	0.002	4|4	0.174|0.108	0.95	1.045|0.864	0.016	4|4	0.894|0.405	Unigene32682_17	MAEAVIDERAPLPTRFYCHVCSMEVNIPNTDFTCPHCSGGFVEELPSVPNTASGSSSTSSLADGPSNSNSDALGLNRLVDLDVIRGEIETLLMSRNGPIEIAIGPANRRGSMLLGSGGGATSSGSNSGVSGGPGGGRVHPPNLGSLDTVLLDFLQSLSGGEDGYFGTTPMFFMGNPGDYAWGREGIDTIVTQLLNQMETSGPPPLPKEKIDEIPKVHVTSEDVEGKTQCSVCWEDFRLNEIVRRLPCLHIYHENCIVPWLDLHGTCPICRKSLSDEENINESVLANADIGVMDSSMTEVQQSEDTVMESDVLNVEPISSDNNDPQPPTSNTGRDSSQTGNQQQQQQGNVFGFDDSVVDLD	45.38	9e-73	gi|125778114|ref|XP_001359837.1|	GA11309 [Drosophila pseudoobscura pseudoobscura]	56.64	3e-33	sp|Q9Y4L5|RN115_HUMAN	E3 ubiquitin-protein ligase RNF115 OS=Homo sapiens GN=RNF115 PE=1 SV=2	53.51	2e-78
134	Unigene29727_17	GI24256 [Drosophila mojavensis]	65397.2965640001	0.012	1	1	-	1	1.088|0.905	0.017	1|1	0.921|0.904	1.26	1.329|1.182	0.011	1|1	0.647|0.856	1.02	1.129|0.914	0.023	1|1	0.901|0.914	0.98	0.995|0.960	0.001	1|1	0.996|0.943	1.28	1.183|1.380	0.019	1|1	0.833|0.637	1.25	1.205|1.288	0.003	1|1	0.802|0.713	Unigene29727_17	MLGGSTDRLCTPSTSAGPFRIFAVTGFQNRANDIVYCPPIRPTGSENAEDSTAVVYFGGDVQDFPESMETNRDSRGYMKYNLENSAILLREAFPRAHIIVIRPVRMEFKTFSCFDNFVRGNNAGVPDHTPMNHALQHLEKLLQNLSQRLISIPENEIMDQAAQAAAAAAAVAAAAALVSSTLSTASTDTSSSSSALNDNNQDMDIDILQVQENVTVDADGAVIFPNVAGAGTGGGVSNSSNTSGGSVTASVNNAANSNIASTATTPHSTQKAPLQSTAHQTQTNNAQHFNNIGGGSSNSNECVTQAQQQSQQLTRQNSNPLWWRENLNLDKAKLVLIGFSKGCVVLNQFIYEFHYLKTLTPDDSTMIRLLSRIKDMYWLDGGHGGQKNTWITSRSLLET…	71.19	7e-178	gi|195395232|ref|XP_002056240.1|	GJ10829 [Drosophila virilis]	45.32	3e-31	sp|Q9D9H8|CB069_MOUSE	UPF0565 protein C2orf69 homolog OS=Mus musculus PE=2 SV=3	71.19	2e-177
135	Unigene15360_17	Pcd [Drosophila virilis]	17989.184737	0.305	3	31	-	0.76	0.742|0.778	0.001	28|30	0.001|0.001	0.87	0.936|0.796	0.010	28|29	0.337|0.001	0.66	0.691|0.629	0.002	31|31	0.001|0.001	1.22	1.197|1.241	0.001	30|27	0.001|0.001	0.73	0.694|0.768	0.003	29|29	0.000|0.000	1.15	1.149|1.160	0.000	28|29	0.093|0.021	Unigene15360_17	QRRNICNETAAHCRYSGRQHRLLCSSLLTAVRANTFKSEKRYYTVVAQKTLAKKKMPKLTEQERSELLQPLLNAGWSLVDNRDAIYKEFLFNDFNTAFGFMTGVALLAEKLNHHPEWFNVYNKVQVTMSTHDVGGLSSKDIRMAKYMEEQAKRL	76.58	1e-43	gi|195394513|ref|XP_002055887.1|	Pcd [Drosophila virilis]	80.81	3e-43	sp|P58249|PHS_DROVI	Pterin-4-alpha-carbinolamine dehydratase OS=Drosophila virilis GN=Pcd PE=3 SV=1	76.58	4e-43
136	Unigene30733_17	GH15943 [Drosophila grimshawi]	30839.170126	0.030	1	1	-	1.04	1.289|0.790	0.125	1|1	0.714|0.728	0.73	0.751|0.703	0.001	1|1	0.645|0.613	1.04	1.045|1.028	0.000	1|1	0.967|0.970	0.99	0.766|1.216	0.101	1|1	0.615|0.697	0.77	0.924|0.611	0.049	1|1	0.936|0.449	0.74	0.585|0.885	0.045	1|1	0.351|0.869	Unigene30733_17	QFDPTAEQLYPILEDIYREIFQLFSPDVFHMGGDEVLSKCWNASEGIRNWMLLKGWSLEEDDFLRLWGYFQEKALERVDSVSNANKPLITLWTSSLTKEPHIDEYLDKSRYIIQIWTRGTSSDILQILKRGYRVIISNNDALYFDCGGPSWVGSGNNWCSPYIGWQKVYDNNLDQIAGDYKSLVLGGEAAIWSEQIDEYTLDYRLWPRSSALAERLWSNPVEGWRDAESRILLHRERLVTNGIHAEALQPEWCLQNENECPVN	71.10	2e-112	gi|195012199|ref|XP_001983524.1|	GH15943 [Drosophila grimshawi]	55.94	3e-82	sp|P49010|HEXC_BOMMO	Chitooligosaccharidolytic beta-N-acetylglucosaminidase OS=Bombyx mori PE=1 SV=1	71.10	8e-112
137	Unigene13102_17	GF17689 [Drosophila ananassae]	54587.2141640001	0.021	1	1	-	1.02	1.115|0.934	0.016	1|1	0.897|0.939	1.13	1.170|1.097	0.003	1|1	0.818|0.920	1.14	1.147|1.135	0.000	1|1	0.890|0.879	0.89	0.822|0.961	0.010	1|1	0.740|0.943	1.27	1.330|1.205	0.008	1|1	0.684|0.818	1.1	1.036|1.158	0.007	1|1	0.963|0.837	Unigene13102_17	VWQDMMFACAMYPATDEFLSSVRTEVIQNAKRIAYHPSIAIIATNNENEAALVDNWYGTAGDRARFEAEYRELYIGTVFHELKIIQDSSRPKPLISSPSNGKASEKDNYISNNPGDENYGDIHFYTNFEDAWNPNIYRRPRFASEYGFQSLPKLTSWQLTMNPKDDLLNLMHHRQHHPSNMTMIIALIRRHLPLPLPEDDNYIDALIYFSQISQAMVTKIETEVYRSLRDTEHHTMGALYWQLNDVWVAPSWSSIDFYGNFKLLHYWAKYFMAPIHIVALYDSDQEAVNVSLICDKLEVDHKGLEVSMNIYKWADLFPKKQIVWPVALKPNGVQYDKIIPIDSIFQGGFTKTNTFVEFVLSDESSVLARNYYFPSAIKNAVGIADPKVTLSVFFTYCYR…	58.77	6e-165	gi|194741620|ref|XP_001953287.1|	GF17689 [Drosophila ananassae]	34.77	5e-63	sp|Q95327|MANBA_CAPHI	Beta-mannosidase OS=Capra hircus GN=MANBA PE=2 SV=1	58.77	2e-164
138	Unigene30595_17	GL13079 [Drosophila persimilis]	33324.334519	0.245	6	12	-	1.07	1.139|1.009	0.008	12|12	0.103|0.965	1.26	1.212|1.309	0.005	12|12	0.001|0.001	1.39	1.403|1.368	0.001	12|12	0.007|0.069	0.78	0.742|0.811	0.002	12|12	0.007|0.002	1.61	1.743|1.474	0.036	12|12	0.001|0.000	1.17	1.059|1.275	0.023	10|12	0.453|0.063	Unigene30595_17	SLRALQATVVTKVERNMSSNILHKRDGESKYHTLSITTPKEFVYHVELNRPKKLNAFNKDMFIEIKKCFENLSTNPDCRVVVLSASGKHFTAGLDLVDAMKLSQDLGAVDEVARKGALLEHTIKLYQDSISSLEICPKPVITAVHSACIGAGVDLITAADIRYCSEDAFFCVKEVDIGMAADVGVLQRLPKVVGSESLARELAYTARRFGAAEAHSFGLVSKVYPSKEACVEGALELASIIAEKSPVAVQATKANIIYSKPRPNQEGLDHIRQTNKLNLQSEDFANSALAALTKEKPTFSKL	66.56	2e-114	gi|125981881|ref|XP_001354944.1|	GA21887 [Drosophila pseudoobscura pseudoobscura]	49.64	2e-73	sp|Q62651|ECH1_RAT	Delta(3,5)-Delta(2,4)-dienoyl-CoA isomerase, mitochondrial OS=Rattus norvegicus GN=Ech1 PE=1 SV=2	66.56	5e-114
139	CL1222.Contig2_17	GI15436 [Drosophila mojavensis]	46559.646745	0.161	5	11	CL1222.Contig1_17	0.95	1.006|0.896	0.006	11|9	0.968|0.080	1.02	1.081|0.950	0.009	11|10	0.237|0.651	1.08	1.106|1.044	0.002	10|11	0.310|0.789	0.89	0.876|0.900	0.000	11|10	0.079|0.149	1.2	1.178|1.226	0.001	10|10	0.008|0.004	1.09	1.101|1.080	0.000	10|11	0.118|0.538	CL1222.Contig2_17	AHANASTVDAQAQLMAQTAANPAAAAAALAASNASPAQTAAAAAAAQLQQQQQVQQAILQVQQQQTQQAVAAAAAAVTQQLQQQSTNGGNTNTQQNGSNGTTETRTNLIVNYLPQTMTEDEIRSLFSSVGEIESVKLIRDKSQAFMDPLNPQGPNKGQSLGYGFVNYVRAQDAEQAVNVLNGLRLQNKTIKVSFARPSSDAIKGANLYVSGLPKNMTQQELEAIFAPFGAIITSRILQNAGNDSQTKGVGFIRFDKREEATRAIIALNGTTPPDCTDPIVVKFSNTPGSTSKIMQPQLPAFLNPQLVRRIGGAMHTPVNKGLARFSPMAGDMLDVMLPNGLGATAAAASALASGPGGAYPIFIYNLAPETEEASLWQLFGPFGAVQSVKIVKDQTTNQC…	94.67	2e-177	gi|195130285|ref|XP_002009582.1|	GI15436 [Drosophila mojavensis]	94.67	4e-178	sp|P16914|ELAV_DROME	Protein elav OS=Drosophila melanogaster GN=elav PE=2 SV=1	94.67	8e-177
140	Unigene15007_17	2 322 RE36921p [Drosophila melanogaster]	12155.125454	0.271	2	8	-	0.85	0.933|0.765	0.014	8|7	0.495|0.009	0.72	0.815|0.629	0.017	8|8	0.013|0.001	0.93	0.913|0.944	0.000	8|8	0.197|0.424	0.92	0.847|0.984	0.009	8|7	0.085|0.905	0.78	0.766|0.792	0.000	8|8	0.011|0.020	0.86	0.920|0.805	0.007	7|8	0.454|0.058	Unigene15007_17	QQQQQQQQLPQLAHPQQPAIAPEEAMRMQQAPPQRLILQPLPEQPRDTMTPPMPDQPQMMQYGRANFGRSLAQPVRIPVPILQPHNEGEIGSSIESERPHFVQPRSV	72.97	1e-08	gi|195126837|ref|XP_002007875.1|	GI13180 [Drosophila mojavensis]	-	-	-	-	72.97	5e-08
141	Unigene15003_17	GI20018 [Drosophila mojavensis]	27184.567175	0.300	5	16	-	0.88	0.859|0.899	0.001	16|15	0.007|0.053	0.93	0.869|0.983	0.006	10|16	0.022|0.906	0.86	0.812|0.900	0.004	15|14	0.026|0.016	1.04	1.055|1.023	0.001	16|14	0.369|0.787	0.88	0.933|0.831	0.005	16|15	0.153|0.000	0.99	1.011|0.974	0.001	16|15	0.961|0.856	Unigene15003_17	MADDWESAADEDVVIRPKITNDVNKWQGEDDDEDVKDSWEDEEEKKDEEKSETKTLVPTKTKPNKALKAKLSEQERLAEEEEAKRLANLTPEEKLAEKLRLKKIQEESDLKSALETFGITGIGNGLDAFNPQTKEEFKEFGATLSWKLSHYKESPHFPQFVEDLVRSICVNLSAADIKKVKMNVESLHTEKLKMEKQNAKKPANKGKNKVSLRTEADDIDGYQKYGNDYAEDFDDFM	79.75	1e-67	gi|195380189|ref|XP_002048853.1|	GJ21266 [Drosophila virilis]	79.75	1e-68	sp|B4LN42|EIF3J_DROVI	Eukaryotic translation initiation factor 3 subunit J OS=Drosophila virilis GN=Adam PE=3 SV=1	81.62	6e-56
142	Unigene14765_17	GJ11194 [Drosophila virilis]	26019.34263	0.133	1	1	-	1.85	1.519|2.171	0.213	1|1	0.545|0.179	1.09	0.961|1.219	0.033	1|1	0.972|0.840	2.44	2.757|2.122	0.202	1|1	0.139|0.219	0.88	1.140|0.615	0.138	1|1	0.870|0.237	1.25	1.049|1.456	0.083	1|1	0.961|0.582	0.61	0.724|0.488	0.028	1|1	0.593|0.267	Unigene14765_17	MGRRPARCYRYCKNKPYPKSRFCRGVPDPKIRIFDLGRKKASVEDFPLCVHLVSDEYEQLSSEALEAGRICCNKYLVKYCGKDQFHIRMRLHPFHVIRINKMLSCAGADRLQTGMRGAFGKPQGTVARVRIGQPIMSVRSSDRYKAQVVEALRRAKFKFPGRQKIYVSKRWGFTKYDRERYEQLRDENRLEPDGCNVKYRPEHGPIAAWEKAQREVYA	97.71	3e-123	gi|195400323|ref|XP_002058767.1|	GJ11194 [Drosophila virilis]	96.79	6e-124	sp|O61231|RL10_DROME	60S ribosomal protein L10 OS=Drosophila melanogaster GN=RpL10 PE=2 SV=1	97.71	9e-123
143	Unigene15437_17	GJ15151 [Drosophila virilis]	43891.465412	0.065	2	7	-	0.85	0.779|0.920	0.010	7|7	0.016|0.469	1.04	0.977|1.094	0.007	7|6	0.911|0.566	1.18	1.171|1.180	0.000	6|7	0.121|0.120	0.7	0.739|0.656	0.003	6|7	0.007|0.001	1.46	1.464|1.453	0.000	6|5	0.001|0.012	1.2	1.187|1.213	0.000	7|7	0.061|0.159	Unigene15437_17	VLLLNYLLSRDVAANAIQDRNLFATELFQTIASVKQNENVIISPVAIQTALGLAYYGADGKTARELQRSLHAQSQSRSGIARSYYKLLHSFVKPKTILEIANKIYAKDELVIEPEFREAAQKYFDSDAEQLDFTDEPKAVDLINKWLAEKTNGKIQNVLNNVEPDINVALVNAIYFKAKWARPFMDDETSDRLFFINDNESVKVPTMFADNWYNYAEYEELDAKAIELFFENTDLRMWFILPNKRNGLFELEQKLKGVDFDELEKRWEWSSVTVNLPKFGFEFDTDLKPYLLKLGIRTMFTDEADFSNIFHESPISTRVSRVQHKAFIDVNEIGCEAAAASVAVGVPMSLPWDPKTFIADHPFVFIIRDPHAIYFTGHIARF	66.67	7e-154	gi|194753540|ref|XP_001959070.1|	GF12698 [Drosophila ananassae]	32.80	5e-45	sp|Q5BIR5|SPB8_BOVIN	Serpin B8 OS=Bos taurus GN=SERPINB8 PE=2 SV=1	66.67	2e-153
144	Unigene7774_17	1 467 LEN=467_ minus strand_ translated	17173.013245	0.173	1	1	-	0.76	0.771|0.741	0.000	1|1	0.739|0.639	0.93	1.021|0.829	0.018	1|1	0.985|0.853	0.56	0.483|0.642	0.013	1|1	0.289|0.483	1.4	1.202|1.594	0.077	1|1	0.809|0.257	0.74	0.769|0.705	0.002	1|1	0.713|0.608	1.24	1.200|1.288	0.004	1|1	0.806|0.757	Unigene7774_17	XQNAIVAETPEMSGSHSEPEMQADDVKNTAEKMVEVHNQRDSKLTEQQVIETLDAGEISSNVSVELRHSTTKEAHVLTPPSSSETIDTEDMPNPSGESQGTAELLEEIEYVLNKSDELQQQLSKDAQTSNIEVTDEFEAAIEDNLSNEIEDFATKN	-	-	-	-	-	-	-	-	-	-
145	Unigene6180_17	GF21159 [Drosophila ananassae]	18651.292993	0.222	2	8	-	1.02	0.938|1.092	0.012	7|8	0.537|0.543	0.97	0.867|1.074	0.021	8|8	0.107|0.502	0.86	0.841|0.888	0.001	8|8	0.035|0.254	1.17	1.301|1.041	0.034	7|8	0.003|0.709	0.85	0.865|0.828	0.001	8|8	0.033|0.023	0.96	0.965|0.962	0.000	8|8	0.830|0.843	Unigene6180_17	MAGSALRRLMAEYKQLTLDPPEGIVAGPVSEDNFFEWEALIAGPEGTCFEGGVFPARLLFPPDYPLSPPKMKFTCDMFHPNIFADGRVCISILHAPGDDPMGYELSAERWSPVQSVEKILLSVVSMLAEPNAESGANVDAAIMWRERREEFNEIARRLVRKTLGIPS	95.81	2e-90	gi|194763170|ref|XP_001963706.1|	GF21159 [Drosophila ananassae]	81.21	2e-76	sp|Q5RF84|UB2G2_PONAB	Ubiquitin-conjugating enzyme E2 G2 OS=Pongo abelii GN=UBE2G2 PE=2 SV=1	95.81	6e-90
146	CL3399.Contig2_17	GL12060 [Drosophila persimilis]	18393.063037	0.075	1	17	-	0.87	0.894|0.845	0.001	15|16	0.113|0.003	0.82	0.917|0.731	0.017	17|17	0.228|0.001	1.07	1.013|1.120	0.006	15|16	0.824|0.019	0.83	0.731|0.937	0.021	17|15	0.001|0.109	0.99	0.996|0.984	0.000	17|16	0.971|0.901	0.92	0.972|0.865	0.006	15|17	0.795|0.059	CL3399.Contig2_17	MARAVLCMAIACILVQCALSQSYDKENRRLILQIKDQKTTNQQYYSSNFDTRNGNYEGLDGRYKGIKEGQYVPDNSGKYVHVEGPTGPPAPPYVHVEGPSGGFGGEGGVGGVGGVGSGGGVGPGGPGGPKGPGGPKGPGGPKGPPGPPGPPGPPGPFGPTGPGPKGPYGPPGPPGPPGPTRPGPGG	76.29	8e-37	gi|195169083|ref|XP_002025357.1|	GL12060 [Drosophila persimilis]	-	-	-	-	76.29	3e-36
147	Unigene15575_17	GA25967 [Drosophila pseudoobscura pseudoobscura]	7526.540976	0.190	1	6	-	0.97	0.994|0.942	0.001	6|4	0.972|0.781	0.94	0.973|0.910	0.002	6|6	0.911|0.509	1.01	0.982|1.034	0.001	5|5	0.926|0.838	1.01	1.022|0.998	0.000	6|6	0.926|0.986	0.96	0.955|0.974	0.000	5|6	0.781|0.913	0.95	0.935|0.963	0.000	5|5	0.775|0.843	Unigene15575_17	QARVQDPKCLQPKEPGPCRMNLERFYYNAQTNACERFKFGGCRGNDNKFGFLKTCEDACVIAK	74.14	7e-21	gi|198474431|ref|XP_002132688.1|	GA25967 [Drosophila pseudoobscura pseudoobscura]	56.14	2e-11	sp|P26228|SBPI_SARBU	Protease inhibitor OS=Sarcophaga bullata PE=1 SV=1	74.14	3e-20
148	Unigene6930_17	GL24104 [Drosophila persimilis]	15376.297091	0.129	1	4	-	1.01	0.912|1.103	0.018	4|4	0.645|0.603	1.17	0.925|1.415	0.120	4|4	0.786|0.111	0.8	0.799|0.796	0.000	4|4	0.168|0.143	1.29	1.370|1.219	0.011	3|3	0.118|0.208	0.87	0.968|0.779	0.018	4|3	0.903|0.302	1.11	1.000|1.229	0.026	4|4	1.000|0.241	Unigene6930_17	MPKYYCDYCDTYLTHDSPSVRKTHCTGRKHRDNVKFYYQKWMEEQAQHLIDATTAAFKAGKITQNPGVAIPPPNMAPPPRPGLMPGGPGMPPMMMGPHGAMPPPMMGMRPPPIMGPMGPMMGPPPPLGALGVRPPMMNGP	98.48	1e-34	gi|125775241|ref|XP_001358872.1|	GA18892 [Drosophila pseudoobscura pseudoobscura]	98.48	2e-35	sp|Q298E0|RU1C_DROPS	U1 small nuclear ribonucleoprotein C OS=Drosophila pseudoobscura pseudoobscura GN=snRNP-U1-C PE=3 SV=1	98.48	6e-34
149	CL710.Contig1_17	GK13151 [Drosophila willistoni]	28096.641426	0.565	9	72	-	1.04	1.032|1.043	0.000	70|69	0.483|0.148	1.29	1.334|1.247	0.004	70|68	0.001|0.001	1.49	1.465|1.520	0.002	70|70	0.001|0.001	0.7	0.682|0.712	0.000	67|71	0.001|0.001	1.84	1.811|1.861	0.001	68|72	0.000|0.000	1.23	1.268|1.190	0.003	72|70	0.001|0.001	CL710.Contig1_17	DKNKKRSKMSRKFCVGGNWKMNGNQKSIAELCKILSAGPLDSNTEVYVGVPAPYLIYARSLLPQSINVAAQNCYKVEKGAFTGEISPAIIKDTGAGWVILGHSERRQIFKESDELIAEKVEHALASGLKVVACIGETLEEREANKTQEVVARQMCAIVQKVKDWSNVVVAYEPVWAIGTGKTATPEQAQEVHAYLRQWLTETISKEVAATLRIQYGGSVTGANAKELAKKPDIDGFLVGGASLKPEFVQIVNARQ	80.08	7e-118	gi|195452622|ref|XP_002073433.1|	GK13151 [Drosophila willistoni]	80.57	2e-116	sp|O77458|TPIS_DROYA	Triosephosphate isomerase OS=Drosophila yakuba GN=Tpi PE=2 SV=1	80.08	3e-117
150	Unigene15523_17	GK13436 [Drosophila willistoni]	59889.5007080001	0.085	4	10	-	1.31	1.280|1.335	0.002	10|9	0.018|0.004	1.16	1.059|1.266	0.021	9|10	0.554|0.008	1.38	1.372|1.396	0.000	10|10	0.008|0.005	1	1.059|0.934	0.008	9|10	0.614|0.647	1.2	1.229|1.167	0.002	10|10	0.005|0.321	0.86	0.874|0.853	0.000	10|9	0.070|0.023	Unigene15523_17	MFGGQQPILVLSQNTKRESGRKVQLENINAGKAIADVIRTCLGPQAMLKMLMDPMGGIVTTNDGNAILREITVQHPAAKSMIEIARTQDEEVGDGTTSVIVLAGEMLAAAEPFLQQQIHPTVIIRAYREALEDIIKHLQSDLSVPLDVNNKDKMAEVVKACVCTKFIGKWSDLAVKIALDAVQTVTLNENGRVEVDIKRYAKVEKIPGGSIDESTVLKGVMINKDVTHPKMRRYIENPRIVLLDCSLEYKKGESQTNVEIIGEQDFTRMLQIEEEFVQRICADIIAVKPDIVFTEKGVSDLAQHYLLKAGITAIRRLRKTDNLRIARACGATIINRTEELSEKDVGTGAGLFEIKKIGDEYFTFITNCKDPKACTILLRGASKDILNEAERNLQDALHV…	92.83	0.0	gi|195451427|ref|XP_002072914.1|	GK13436 [Drosophila willistoni]	91.91	0.0	sp|P48605|TCPG_DROME	T-complex protein 1 subunit gamma OS=Drosophila melanogaster GN=Cctgamma PE=2 SV=2	92.83	0.0
151	CL183.Contig1_17	LD37240p [Drosophila melanogaster]	36442.855284	0.054	1	1	CL183.Contig2_17	1.19	1.179|1.201	0.000	1|1	0.828|0.809	0.99	1.076|0.900	0.015	1|1	0.928|0.916	1.11	1.070|1.150	0.003	1|1	0.947|0.866	1.08	1.057|1.093	0.001	1|1	0.940|0.874	0.92	0.862|0.982	0.007	1|1	0.863|0.985	0.82	0.912|0.737	0.015	1|1	0.898|0.640	CL183.Contig1_17	RAAAIPYKKPFKNLGNGGGGSAHPGNFNPMMFNCSQIPDNPGYLDFNNPSPPVVGSGGGNGLGQMQQKKKNNKNRPKGKPQTHFQQPPVNTQAQQNGSGNWNKNKGVQFQGPNNTTNNRFNGGNVGGPRNFNNGAPIPPNGPNRGRRMGPTGPVPRGNVSMPPMPPPHGFQPPMIPPMPPMGRGPMPPPMGIQPPPPFLRRSGRIGPIPPIPPPIPPMIPPRMPRVMPPVPFTNVGKIKKPNTKLLKKVVKGKSTIKTLKNLVNQYPIEKPWVTEEIRAEYDKKVDIENRLKGNKNDDLFAQFKVQRDKFVSMYETAREEYLKKEAEAVKAK	81.48	1e-32	gi|295771|emb|CAA31321.1|	K10 protein [Drosophila melanogaster]	81.48	2e-33	sp|P13468|K10_DROME	DNA-binding protein K10 OS=Drosophila melanogaster GN=fs(1)K10 PE=2 SV=2	80.25	4e-32
152	CL306.Contig4_17	GE16005 [Drosophila yakuba]	63951.5484790002	0.014	1	2	CL306.Contig1_17	1	0.812|1.181	0.068	2|2	0.656|0.724	1.24	1.161|1.309	0.011	2|2	0.785|0.591	0.86	0.836|0.881	0.001	2|2	0.731|0.809	1.17	1.379|0.965	0.086	2|2	0.304|0.931	1.08	0.960|1.194	0.027	2|2	0.955|0.753	1.23	1.377|1.081	0.044	2|2	0.406|0.889	CL306.Contig4_17	YALLFLAVTSQKCYVVESGGPPSDTMGTIAANRYNAEQQQQHQQQHHPHTASQHQGGTGGGSNSGVPAPATPTAATHALYHPSAAGSGHMEHRNSYNLLSEAMSQAVSNEFNSLGSGSADGACHADDLDCYSGNVQDRLGMEAIRTLHRQLDDDDNGNIDLSESDDFLREELKYDSGYEKRQKAFHFNDDMHISVKELWQAWLRSEVHNWTMEQTTDWLAQSVQLPQYVELFRLHKVTGATLPRLAVNNMHYVGNVLGIKDPIHKQKIALKAMDVVLFGPPRETGTRWKDYILVTLLLSAIIGCWYAYQQNKNAKRHLRRMAQDMEGLQRAEQSLQEMQKELERARMEQENVATEKMDLERRLKEAPTLSSSSSDLEVQKLKKEIEILRTELSRAEIEL…	87.22	0.0	gi|24642358|ref|NP_523357.2|	stromal interaction molecule, isoform A [Drosophila melanogaster]	87.22	0.0	sp|P83094|STIM_DROME	Stromal interaction molecule homolog OS=Drosophila melanogaster GN=Stim PE=1 SV=1	87.22	0.0
153	Unigene33627_17	Muscle-specific protein 300, isoform I [Drosophila melanogaster]	35788.321311	0.042	1	1	-	1.65	2.296|0.994	0.848	1|1	0.240|0.995	1.41	1.255|1.563	0.047	1|1	0.729|0.572	2.24	3.084|1.405	1.410	1|1	0.135|0.614	0.79	0.598|0.980	0.073	1|1	0.429|0.967	1.56	1.709|1.401	0.047	1|1	0.373|0.622	1.16	0.884|1.438	0.153	1|1	0.865|0.640	Unigene33627_17	ISGSVSSLDSVGKNVSDQKAEKWKQGARKTLLNWVTNALPKDSGIEVKDFGASWRDGVAFLALIDAIKANLVNLADLKKTNNRQRLETAFDVAESKLGIAKLLDAEDVDVPKPDEKSIMTYVAQFLHKYPEPKGASRDTSHIHQELDELRRFLVEKTTEYEPMVMSNSFPRDFAEYLIARSEIDAHLPAYNRLKQLMDSQSGFLQVPRSVWEDINALWQRLQYQMNYWLWLLDSELPGEFSVVGKWLAEAEKLLMDNEIPNAMNEETASVISRKLEEHKLFFADLPRIMAMFDNAKRSPLVQQVPIEQLRNME	87.90	8e-166	gi|320544542|ref|NP_001188694.1|	Muscle-specific protein 300, isoform D [Drosophila melanogaster]	35.83	5e-43	sp|Q6ZWR6|SYNE1_MOUSE	Nesprin-1 OS=Mus musculus GN=Syne1 PE=1 SV=2	87.90	3e-165
154	Unigene15123_17	GF16667 [Drosophila ananassae]	9767.279686	0.218	2	14	-	0.5	0.510|0.480	0.000	11|14	0.001|0.001	0.71	0.736|0.689	0.001	13|14	0.001|0.001	0.54	0.531|0.546	0.000	13|14	0.001|0.001	0.89	0.870|0.901	0.000	14|14	0.001|0.005	0.81	0.802|0.819	0.000	14|14	0.000|0.000	1.43	1.397|1.458	0.002	14|14	0.001|0.001	Unigene15123_17	MLNLSRVVVRNLTTSAPRRAAAKDEVEKGYFELKKVQEHFQKNDGKPVFLKGSFADQLLYRFTVALSLAGIGGMLKLFYDLSVPKTQ	71.91	1e-30	gi|194744215|ref|XP_001954590.1|	GF16667 [Drosophila ananassae]	70.79	8e-31	sp|Q9VHS2|COX7A_DROME	Probable cytochrome c oxidase subunit 7A, mitochondrial OS=Drosophila melanogaster GN=CG9603 PE=1 SV=1	71.91	5e-30
155	Unigene14535_17	GM19908 [Drosophila sechellia]	26796.062565	0.194	4	9	-	2.02	2.094|1.943	0.011	9|7	0.001|0.001	1.42	1.278|1.567	0.042	9|6	0.078|0.001	2.41	2.461|2.362	0.005	9|9	0.001|0.002	0.81	0.754|0.872	0.007	8|5	0.014|0.141	1.58	1.663|1.495	0.014	9|9	0.016|0.014	0.65	0.643|0.650	0.000	9|8	0.001|0.004	Unigene14535_17	LILYGTKKSVPVRAVLLTLKALDLDFEFREVNIFAKEQMQPEFLEKNPQHTVPTLEDGEHIIVDSHAITCYLVRKYGKDDTLYPEDFYARAVVDHRLYYEAATLFATCLKQITGPLFQQNVVDIPKEKFEQIHNAYTLLETFLSKSAYMAGGNLTIADFSIVSTVSLLNVTFVAIDANKWPKLAEWLKRLEALPYYADILEAALKEHAELVHNKLPKQYEKLWKKAYEEIKS	87.93	4e-118	gi|386118266|gb|AFI99084.1|	glutathione-s-transferase epsilon class 7 [Bactrocera dorsalis]	40.10	3e-36	sp|P46430|GSTT1_MANSE	Glutathione S-transferase 1 OS=Manduca sexta GN=GST1 PE=2 SV=1	53.02	8e-67
156	Unigene7088_17	GD25268 [Drosophila simulans]	25338.000361	0.290	3	18	-	1.49	1.437|1.552	0.007	17|17	0.001|0.001	1.03	1.047|1.020	0.000	17|18	0.745|0.942	1.5	1.607|1.400	0.021	18|16	0.001|0.001	1	1.045|0.952	0.004	17|17	0.777|0.559	1.04	0.967|1.120	0.012	17|18	0.788|0.012	0.7	0.759|0.641	0.007	18|13	0.001|0.001	Unigene7088_17	MVGNRIWRALNLACFIGIVISPCGLAQAKVAHKIHCTENQMQVEIQIPEANKEDLGKQPQIYLEGLKDYPNERCQPQISELQAVFRLSLTDFYECGVTRMVNQLTGKKVYYHKILIESAEGKEVVSVKCITTEPFYNVLLLNATKYHGIVKRDVLPAGFQEPEDLEITTSLTERAPEPRLSIGVNQNGKKVTGDLTVTPGTPLTMEINLDRDSATVYGFGVDYL	67.95	4e-84	gi|195585129|ref|XP_002082347.1|	GD25268 [Drosophila simulans]	-	-	-	-	67.95	1e-83
157	Unigene14393_17	50 1654 minus strand chaperonin complex component TcP-1 beta subunit CCT2 [Glossina morsitans morsitans]	58289.524093	0.181	6	7	-	1.39	1.366|1.408	0.001	7|6	0.137|0.095	1.16	1.228|1.098	0.008	7|7	0.085|0.906	1.24	1.183|1.296	0.006	7|7	0.448|0.250	0.97	0.923|1.011	0.004	5|6	0.565|0.945	1.23	1.203|1.247	0.001	7|6	0.285|0.161	0.94	0.955|0.921	0.001	7|7	0.852|0.671	Unigene14393_17	MEMSLNPVRVLKSEAQEEKAEMARLSSFIGAIAIGDLVKSTLGPKGMDKILVAHGRNAGQVEVTNDGATILRAVGVDNPAAKILVDMSRVQDQEVGDGTTSVTVLAAELLREAEKLVEQKLHPQIIIAGWRLATQVAREALIQASQDNSANDVKFKEDLLNIARTTLSSKILHQHKEFFSKLAVDAVLRLKGSGELHAIQIIKKTGGTLDDSFLDDGFLLDKKPGVHQPQRIEKAKILIANTPMDTDKIKVFGSTIKVDSLAKIADLELAEKEKMKDKVQKILNHNCNVFINRQLIYNYPEQLFADAGVMAIEHADFDGIERLALVTGGEIVSTFDNPSLVKLGECDVIEQVMIGEDILLRFSGVKLGEACTVVIRGATQQIIDEADRSLHDALCVLAA…	89.87	0.0	gi|194769326|ref|XP_001966756.1|	GF19192 [Drosophila ananassae]	72.98	0.0	sp|Q3ZBH0|TCPB_BOVIN	T-complex protein 1 subunit beta OS=Bos taurus GN=CCT2 PE=1 SV=3	90.84	0.0
158	Unigene32655_17	GA19751 [Drosophila pseudoobscura pseudoobscura]	7929.049998	0.149	1	1	Unigene32654_17	0.65	0.597|0.712	0.007	1|1	0.451|0.587	0.52	0.691|0.358	0.055	1|1	0.528|0.176	1	0.933|1.058	0.008	1|1	0.949|0.944	0.66	0.624|0.689	0.002	1|1	0.396|0.374	0.8	0.668|0.934	0.035	1|1	0.522|0.944	0.82	1.021|0.615	0.082	1|1	0.976|0.487	Unigene32655_17	ESARILAIFPFPGRSQFICVEPFLKALSLRGHELTVISMYPQTKPIANWRDIEVTEMRKYYDALFCE	58.21	2e-15	gi|198455269|ref|XP_001359925.2|	GA19751 [Drosophila pseudoobscura pseudoobscura]	-	-	-	-	58.21	1e-14
159	Unigene6240_17	GE22109 [Drosophila yakuba]	34104.871997	0.030	1	1	-	1.34	1.376|1.303	0.003	1|1	0.648|0.686	1.01	1.059|0.968	0.004	1|1	0.952|0.974	1.39	1.474|1.296	0.016	1|1	0.597|0.720	0.98	1.019|0.931	0.004	1|1	0.982|0.905	1.04	0.956|1.128	0.015	1|1	0.963|0.896	0.76	0.785|0.727	0.002	1|1	0.720|0.621	Unigene6240_17	MYKQTCTNLLEQPPEKVREWLNGFDAVITDCDGVLWVYSNVIEGAVDTMNCFKSIGKKIFFCTNNSTKTRQQLLEKSHSMGFDITADGMISSSHSTAAYLKARNFQKKVYVIGAGGITGELDAVGIKHSDIGPDVMTSTLADYLATSFSKDPEIGAVVVGFDEHFSFCKMIKAASYLDNPECLFIATNTDERFPMPGMVIPGSGSFVRAVQTCAEREPFVIGKPNPSICEWLINEGTIDPTRTLMIGDRCNTDILLGYNCGFQTLLVGTGIHKLNDVEAWKKSDDPEQKKLIPDVFLPKLGDLLP	70.82	9e-133	gi|195494715|ref|XP_002094957.1|	GE22109 [Drosophila yakuba]	39.53	7e-58	sp|Q8CHP8|PGP_MOUSE	Phosphoglycolate phosphatase OS=Mus musculus GN=Pgp PE=2 SV=1	70.82	3e-132
160	Unigene17001_17	GF10536 [Drosophila ananassae]	15590.426824	0.358	3	12	-	1.44	1.416|1.463	0.001	12|12	0.035|0.013	0.37	0.408|0.324	0.004	11|11	0.001|0.001	1.54	1.508|1.577	0.002	12|12	0.018|0.017	0.94	0.947|0.941	0.000	12|12	0.635|0.218	0.41	0.394|0.418	0.000	11|11	0.000|0.000	0.24	0.270|0.205	0.002	12|12	0.001|0.001	Unigene17001_17	NGSKSTLFFAFCTLFALAIAHPLLEEPALYNDDPTVYLVDEQNWIERDPSELLDRHVRSPASSEDSSKEDKGRGRVELKYEETERGREGSFKYNHNLLRSDDDSYSIDAYAQGRRNYDWNQNDFQGGLEGRWNF	42.72	2e-06	gi|194750727|ref|XP_001957681.1|	GF10536 [Drosophila ananassae]	-	-	-	-	42.72	8e-06
161	Unigene15387_17	GE20635 [Drosophila yakuba]	13512.150608	0.426	2	16	-	0.79	0.745|0.839	0.004	14|16	0.001|0.016	0.77	0.841|0.699	0.010	14|15	0.003|0.001	0.84	0.774|0.899	0.008	14|16	0.001|0.181	0.96	0.927|0.983	0.002	15|16	0.009|0.799	0.81	0.762|0.850	0.004	15|13	0.000|0.002	0.97	1.090|0.852	0.028	14|15	0.323|0.084	Unigene15387_17	MAFLKYTIVVCLALVGVARCALLRAAPAPVALAAPAPVVPINTEIDPHPQYAFAYNVQDALTGDSKSQQEVRDGDVVKGSYSVLDADGSLRTVFYTADPINGFNAVVQRGPVAPVLAAKPVVPLAPAPL	70.00	9e-35	gi|194750845|ref|XP_001957740.1|	GF23876 [Drosophila ananassae]	75.76	1e-24	sp|P81225|CU21_LOCMI	Cuticle protein 21 OS=Locusta migratoria GN=ACP21 PE=1 SV=1	70.00	4e-34
162	Unigene7272_17	134 1558 minus strand cytosolic sorting protein GGA2/TOM1 [Glossina morsitans morsitans]	52332.1322030001	0.238	8	56	-	0.94	0.932|0.950	0.000	56|56	0.201|0.283	0.95	0.985|0.921	0.002	56|56	0.786|0.021	0.99	0.924|1.062	0.010	51|55	0.003|0.059	0.93	0.904|0.964	0.002	56|53	0.002|0.411	1.01	1.031|0.984	0.001	55|56	0.421|0.840	1	1.035|0.960	0.003	56|56	0.475|0.501	Unigene7272_17	MASFFNNPFSTPIGQRIEQATDSTLASENWALNMEICDMINESSDTARDAMKAIRKRLSQNAGKDNQVIMYTLTVLETCVKNCGKAFHVLVAQKDFIQELIKLIGPKNDPPAVMQEKVLSLIQIWADAFKNQPDLNGITQMYMELKNKGIEFPQTDIEHLAPIYTPQRSVPEPPPQVVQQAISPQHAIPMTPHNNGPNVLSAEQTTKLQSELEVVAHNMSVLGEMLTELKPGQEDPDDYALLTELTATCKEMQARIVDLIGRINDDELTAELLRLNDELNNLFLRHQRYEKNRTSSSATSPSAILGAAIGVPPTTSASQGSAIPNDSRLIDLDARAEKLSNTFSAMSTNPAKPLNKDIDEFDMLAQSRTDTNNKSDLLKDIPTVDATAGSINLPFKRTK…	64.27	1e-154	gi|21355331|ref|NP_648315.1|	CG3529, isoform B [Drosophila melanogaster]	41.84	7e-86	sp|Q6ZVM7|TM1L2_HUMAN	TOM1-like protein 2 OS=Homo sapiens GN=TOM1L2 PE=1 SV=1	71.73	8e-170
163	Unigene31592_17	Pcp [Drosophila pseudoobscura pseudoobscura]	16267.367294	0.524	4	6	-	0.87	0.965|0.773	0.018	6|5	0.894|0.050	0.84	0.888|0.801	0.004	6|5	0.313|0.159	0.91	0.949|0.877	0.003	6|5	0.759|0.259	0.97	0.860|1.089	0.026	6|6	0.148|0.524	0.88	0.965|0.802	0.013	6|5	0.794|0.124	1.02	0.959|1.087	0.008	6|6	0.850|0.546	Unigene31592_17	LRNDQEMKKDGSYHYQYETGNGISGMEQGKAGVAVRGASSYVSPEGVEIKLSYTADESGYHPVGEHIPKTPDYVLRALEYIRTHPFKVIKARDVRPPLSTEIAPPLLTPSNLRNFNYKSSSFNSKSAATKRPSQLNARRNNLRRR	63.64	5e-29	gi|198476553|ref|XP_001357393.2|	Pcp [Drosophila pseudoobscura pseudoobscura]	63.64	7e-30	sp|P16369|CUPP_DROPS	Pupal cuticle protein OS=Drosophila pseudoobscura pseudoobscura GN=Pcp PE=2 SV=2	63.64	2e-28
164	Unigene7599_17	GJ12145 [Drosophila virilis]	37875.16104	0.376	9	64	-	0.99	0.981|0.991	0.000	61|61	0.731|0.916	1.06	1.054|1.066	0.000	63|62	0.261|0.170	0.91	0.901|0.926	0.000	61|64	0.002|0.091	1.1	1.112|1.091	0.000	62|63	0.001|0.001	0.97	0.971|0.965	0.000	64|63	0.552|0.609	1.06	1.045|1.065	0.000	63|62	0.442|0.126	Unigene7599_17	LLLLFNVVFLAYAIPKPDDEEIIAGDSPLDHDSDGEKHFEGGHHNKQYDHEAFLGEDEAKAFDQLPPEESKRRLGLLVDRIDEDKDGFVTLSELKRWIEYTQRRYIDEDVNRTWKMHNPDLNDTIGWEEYRDNVYGFLDSMDKEEIENDEHSMSFKRLLKRDRRRWGVADKDLDDKLTREEFTAFLHPEDHPTMKDIVLTETIEDIDSNGDGKISVDEYIADMYRNSEPNDEEPEWVKNEREGFSKFRDINGDGYLDREEVRTWIVPKDFDHAESEAKHLVFEADNDDDEKLTKEEILEKYDVFVGSQATDFGEALARHDEF	73.99	5e-129	gi|195376517|ref|XP_002047043.1|	GJ12145 [Drosophila virilis]	55.35	1e-92	sp|B5X4E0|CALUB_SALSA	Calumenin-B OS=Salmo salar GN=calub PE=2 SV=1	73.99	2e-128
165	Unigene29385_17	117 572 actin-related protein ARP2/3 complex subunit ARPC5 [Glossina morsitans morsitans]	16922.528451	0.368	3	15	-	0.91	0.819|1.006	0.017	12|12	0.051|0.961	0.96	1.008|0.912	0.005	15|12	0.965|0.155	0.99	0.947|1.040	0.004	12|12	0.651|0.399	0.96	0.992|0.918	0.003	14|14	0.944|0.104	1.03	1.011|1.041	0.000	12|12	0.906|0.581	1	1.088|0.911	0.016	11|13	0.156|0.151	Unigene29385_17	MAKNTSSSAFRKIDVDQYNEDNFKEDEADPISVSVGPDENEITTLLTQGKSVEALVNVLQNAPLRCKNQHVKDNALNTTLRVLLSIKSSQMDQAVEALEQNDLLDVLMKYIYRGFEIPSEGSSGHLLQWHEKAFAKGGVGCIVRVLSDTNRA	84.97	2e-72	gi|195032009|ref|XP_001988425.1|	GH11156 [Drosophila grimshawi]	53.38	8e-37	sp|Q4KLF8|ARPC5_RAT	Actin-related protein 2/3 complex subunit 5 OS=Rattus norvegicus GN=Arpc5 PE=1 SV=3	89.47	1e-72
166	Unigene2355_17	GK19789 [Drosophila willistoni]	33051.214839	0.025	1	2	-	1.3	1.742|0.866	0.384	2|2	0.124|0.776	0.9	0.706|1.095	0.076	2|2	0.353|0.899	1.08	1.300|0.868	0.093	2|2	0.567|0.784	1.17	1.003|1.331	0.054	2|2	0.996|0.276	0.81	1.088|0.532	0.155	2|2	0.894|0.095	0.85	0.448|1.256	0.326	2|2	0.024|0.620	Unigene2355_17	MASEGVDDWDAPLPSSSTIEPEEEEIILEDKKKELKNMEKLKNYVARMSYKPAPPPCVRPRTDQISGAQKRIIVDSYLQHGKVLTPKERRQRVKRLARKYNAISTEQLEQIIKNQKGKERKREDLYKRKQELYYEMLTKLERQCRTQYLNVLIKKFSNFIAKLATTMQIPPQLVEPYSRMQRGIFCNILLAIGVQPTNQNAIYYTTPEAMEYEVCHKLAHALLSLIIKALDSASTKNPDEIVPQEADFEMDRYIKDRLMCAAEKKILSTRNQAHQKQLNSSN	94.42	3e-116	gi|312285708|gb|ADQ64544.1|	hypothetical protein [Bactrocera oleae]	-	-	-	-	94.42	1e-115
167	Unigene7441_17	GA11401 [Drosophila pseudoobscura pseudoobscura]	31462.763696	0.326	5	9	-	0.92	0.895|0.943	0.001	9|9	0.139|0.708	1.04	1.015|1.061	0.001	8|9	0.944|0.554	1.18	1.155|1.206	0.001	9|7	0.061|0.027	0.81	0.846|0.774	0.003	9|9	0.137|0.012	1.29	1.249|1.337	0.004	9|9	0.038|0.004	1.13	1.144|1.106	0.001	9|9	0.048|0.514	Unigene7441_17	STLPVVLWHGMGDTCCLPFSMGAIKKLIQAETNGTYIRSLKIGGNIALDYESGFFIHPDDQVRYVCEQLANDEQLTNGYNAIGFSQAGQFFRAVAQRCSTPPMKTLITIGGQHQGVFGLPKCPSLTSKTCEHLRKLLHRAAYKEWLQRDLVQATYWHDPLHEEEYRQKSSFLSGINNEVFINQTYIENLDKLEKFVMVMFLNDTIVQPKESQWFGFYSPGQDTIIRPLKESPVFEDLGLNRLDGDGRLIYLSVEGDHLQMTSKWFIENIIPQL	69.23	3e-113	gi|125981947|ref|XP_001354977.1|	GA11401 [Drosophila pseudoobscura pseudoobscura]	63.60	4e-102	sp|Q9W3C7|PPT1_DROME	Palmitoyl-protein thioesterase 1 OS=Drosophila melanogaster GN=Ppt1 PE=1 SV=2	69.23	9e-113
168	Unigene14319_17	GI22196 [Drosophila mojavensis]	14890.863108	0.110	1	6	-	2.1	2.102|2.101	0.000	6|5	0.001|0.001	0.43	0.470|0.388	0.003	6|6	0.001|0.001	1.86	2.128|1.593	0.143	6|6	0.001|0.006	1.15	1.241|1.068	0.015	4|5	0.114|0.527	0.4	0.333|0.465	0.009	6|6	0.000|0.001	0.22	0.243|0.202	0.001	6|6	0.001|0.001	Unigene14319_17	FIFACSIMSMVSARPTFDKIADALLDVLDPYTKYPPGYHNHQDGYHLHHHDHHYYGSGSQPNGYYQNPNIGYPHVEQNYHPSQGPYSQGYYPQRPYYDNRRYPNTAPDVSVEINGSFQPKRYHHHGY	-	-	-	-	-	-	-	-	-	-
169	Unigene15407_17	GJ14930 [Drosophila virilis]	35496.791898	0.045	1	4	-	2.13	2.135|2.120	0.000	4|4	0.002|0.001	3.43	2.345|4.507	2.337	4|3	0.001|0.001	2.01	1.945|2.068	0.008	4|4	0.001|0.001	1.1	1.080|1.110	0.000	4|4	0.870|0.649	2.71	3.207|2.204	0.503	4|4	0.000|0.001	1.39	1.195|1.585	0.076	4|4	0.306|0.012	Unigene15407_17	MSVDIKNVLICDAVDKACVELLQNNGINVDTKLKLPVNELCTVVKNYNAVIVRSDTKITAEVIKAGTAEGGQLKAVGRAGAGVDNIDVAAATNHGVVVLNTPGGNSISACELTCLLIGALARPILPAAQSLKEGRWDRKLYSGTELYGKTLAVIGLGRIGREVAIRMKTWGMRTIGYDPITTEEEARAAGIEKLELDNIWPLADYITVHTPLIPQTVNLISTQTLAKCKHGVKVVNVARGGIVDEQAILDALESGICNGAAFDVFPEEPPKSEVTKTLIAHPKVVATPHLGASTAEAQVRVAVEVAEQFVALTGKSQKYTTYPGVINKDVL	81.87	6e-146	gi|195385134|ref|XP_002051263.1|	GJ14930 [Drosophila virilis]	54.30	6e-88	sp|Q61753|SERA_MOUSE	D-3-phosphoglycerate dehydrogenase OS=Mus musculus GN=Phgdh PE=1 SV=3	81.87	2e-145
170	Unigene25022_17	1 237 LEN=237_ minus strand_ translated	9318.452633	0.263	1	1	-	1.39	1.622|1.166	0.104	1|1	0.444|0.846	1.23	1.386|1.081	0.047	1|1	0.589|0.938	1.25	1.281|1.220	0.002	1|1	0.759|0.800	1.11	0.962|1.252	0.042	1|1	0.959|0.642	1.12	1.122|1.113	0.000	1|1	0.903|0.908	0.89	0.868|0.908	0.001	1|1	0.850|0.901	Unigene25022_17	XAYLTYNDPVMPYVSYFYGHKDLNNKIGCNQLLKATAIIDQAVDFQHLVNSETLQPELMRDTPLCMESFKYLFNGSRIPX	39.24	2e-07	gi|443692271|gb|ELT93902.1|	hypothetical protein CAPTEDRAFT_215687 [Capitella teleta]	55.13	5e-21	sp|Q00614|CACP_CANTR	Carnitine O-acetyltransferase, mitochondrial OS=Candida tropicalis GN=CAT2 PE=3 SV=1	55.13	3e-21
171	Unigene32555_17	vulcan, isoform D [Drosophila melanogaster]	65636.9584530002	0.021	1	1	-	1.04	0.956|1.116	0.013	1|1	0.966|0.896	0.76	0.799|0.716	0.003	1|1	0.732|0.654	0.95	0.850|1.048	0.020	1|1	0.865|0.951	1.1	1.076|1.114	0.001	1|1	0.924|0.853	0.7	0.682|0.711	0.000	1|1	0.549|0.619	0.73	0.829|0.637	0.018	1|1	0.799|0.461	Unigene32555_17	MDRSVDSIGSCSLDVNADSTDVSDTSGSLNFPTPMSIKDITTEFTTNIRERCSVQTFHEINKNCIGFESQMVLKQPLTNINTRCALLNSSNPNSNKIVGQTDSSSDKKPSYLNLACCVNGYSNLTTYDSKIRQDINKSREVSPIRPSSSSIQHCKKSNSLAPPILLQMDDGRGDISNTKPIATNGLSSNIGSNNSENNEHCDSPWQEDSRNSSFIQQRVERLYGPAALAQGFYSPKKVRSTFACTPPRDLDDAGSSELARKFQQLTPSKDYSEFRKKLSATTTNSPRQIISATEISTFNNNTVDLPVLRHLSQEFRAQLPIISPKKNQIRSPLHKNLSPENYTTDTVEVLIDEVDRKEISKSKFGISNEHSENASNIQYKFLVKSNVIYPPIECLEKNG…	49.09	9e-140	gi|195425674|ref|XP_002061118.1|	vlc [Drosophila willistoni]	37.50	2e-21	sp|Q9P1A6|DLGP2_HUMAN	Disks large-associated protein 2 OS=Homo sapiens GN=DLGAP2 PE=1 SV=4	49.09	3e-139
172	Unigene15759_17	cecropin 2 [Ceratitis capitata]	6730.720015	0.683	2	45	-	2.7	2.931|2.466	0.108	45|45	0.001|0.001	0.46	0.470|0.458	0.000	44|40	0.001|0.001	1.61	1.643|1.576	0.002	41|44	0.001|0.001	1.8	1.834|1.757	0.003	45|45	0.001|0.001	0.29	0.295|0.275	0.000	44|44	0.000|0.000	0.2	0.227|0.172	0.002	44|44	0.001|0.001	Unigene15759_17	MNFRGVFIVLALLMAIFAGQTEAGWLKKIGKKIERVGQHTRDATIQTIGVAQQAANVAATLKG	76.19	2e-21	gi|134859|sp|P08375.1|SRX1A_SARPE	RecName: Full=Sarcotoxin-1A; AltName: Full=Sarcotoxin IA; Flags: Precursor	76.19	2e-22	sp|P08375|SRX1A_SARPE	Sarcotoxin-1A OS=Sarcophaga peregrina PE=1 SV=1	77.78	1e-20
173	CL2109.Contig2_17	GJ19941 [Drosophila virilis]	46249.458251	0.132	4	5	CL2109.Contig1_17	0.97	1.048|0.885	0.013	3|5	0.873|0.339	0.93	0.922|0.929	0.000	4|5	0.772|0.695	1.17	1.170|1.169	0.000	5|3	0.192|0.468	0.82	0.758|0.886	0.008	5|5	0.017|0.403	1.19	1.148|1.226	0.003	4|4	0.361|0.262	0.97	0.894|1.036	0.010	4|5	0.618|0.840	CL2109.Contig2_17	MPRDYDRDYNDDTTDYKRKRRTDDEAGGGSNTGAGSSGDMDGHGRGQDHGQAMQSHDAPPLNEKTNSYLEQCEQEKKTLGKDHTVCKRLIDDEIEKILVSGRIPKPEIYANVYSEKPIRVAQKVLFPIKEYPKFNFVGKILGPKGNTLRQLQEETFCKMVVMGRNSMRDHAKEEELRNSGNPKYAHLSRDLHVEISTVAPPSEAYHRLAYALAEIRKFMIPDANDDIRMEQMREMDGKERMYKKTHYSKSYGEHAVYSCRTPPPPAFEKSSKPKVYSILEKARYVMEDPGYGLVKSHRSRDHELYEHHGEYDRYTPPPPSKHSSTHHAQYESGSYERDYRREYHPHSSSYTAAYPAKPSNGRSSSSYRPATSGSHSSSHYEAGSRSRGESVRYRSAPYP…	79.78	2e-154	gi|195027123|ref|XP_001986433.1|	GH20534 [Drosophila grimshawi]	54.71	3e-46	sp|Q920F3|KHDR2_RAT	KH domain-containing, RNA-binding, signal transduction-associated protein 2 OS=Rattus norvegicus GN=Khdrbs2 PE=1 SV=1	79.78	6e-154
174	Unigene32584_17	GI18990 [Drosophila mojavensis]	78525.9728920001	0.017	1	1	-	1.29	1.217|1.368	0.011	1|1	0.790|0.621	1.04	0.963|1.119	0.012	1|1	0.974|0.916	1.4	1.136|1.673	0.144	1|1	0.899|0.404	0.95	0.822|1.078	0.033	1|1	0.772|0.899	1.11	1.310|0.900	0.084	1|1	0.708|0.908	0.81	0.824|0.786	0.001	1|1	0.794|0.735	Unigene32584_17	YTHLGSLGRKPTHNRYIARTRTTGERRTVEARSYQFDFMRDLSQLVNKSPRNIRRIIEHNACSRAFFNPQRLNDVLSRAKTTITSKGICVSVDVGLPMRKRAKHLIDITFSASGPTHSKILAPLVGHQIDFARHFKTDRSIDAEMKRNPTIFSRLKTAFGGNPQKIDAELSQVQAETLKKLLKKSSEQGQKKNEVDSIKIAFAEGYLAAANSDESPKSGKTMKYLKVFQQLLVIVVFIGIFLSLFSSSNGSMFSRIQLGNQVEVDPEEIHVTFDDVKGCDEAKQELKEVVEFLKNPEKFSNLGGKLPKGVLLVGPPGTGKTLLARAVAGEANVPFFHAAGPEFDEVLVGQGARRVRDLFKAAKQRAPCVIFIDEIDSVGAKRTNSVLHPYANQTINQLL…	76.01	0.0	gi|195122172|ref|XP_002005586.1|	GI18990 [Drosophila mojavensis]	65.42	4e-164	sp|P54813|YME1_CAEEL	ATP-dependent zinc metalloprotease YME1 homolog OS=Caenorhabditis elegans GN=ymel-1 PE=2 SV=2	76.01	0.0
175	Unigene30462_17	GF24694 [Drosophila ananassae]	25316.577988	0.041	1	3	-	0.63	0.535|0.727	0.018	1|3	0.328|0.619	1.94	1.831|2.039	0.022	3|3	0.204|0.452	0.54	0.839|0.248	0.175	1|3	0.854|0.294	2.02	3.372|0.663	3.669	3|1	0.291|0.323	1.41	0.624|2.199	1.240	3|3	0.451|0.023	2.17	1.970|2.364	0.078	3|3	0.002|0.484	Unigene30462_17	SDTRHVSNQSSDVISNNYIEVENNQNQLENNNSVFLNENLAKNVISIKSSPELVNNEKSNKVMKKEDRTEQSALTKLMGYILPTAAQSDNKKIDITKTNWWECEALQFMRGMMDECTHLKNFSVPFDTSLIIAVCAKDDAYVPREGCAGLEDIWPGVEVRYLDAGHVSAYVLHQKLFRKCIIEAFERSKQIYIMDKGSIGEDLKPTLTYKELVNKYTNSI	63.87	2e-64	gi|28316868|gb|AAO39457.1|	RH36554p [Drosophila melanogaster]	60.67	2e-28	sp|Q4V7A8|CD029_RAT	Uncharacterized protein C4orf29 homolog OS=Rattus norvegicus PE=2 SV=2	63.87	7e-64
176	Unigene15554_17	GJ24466 [Drosophila virilis]	59941.1195200002	0.021	1	1	-	0.74	0.893|0.591	0.046	1|1	0.890|0.353	0.7	0.829|0.567	0.034	1|1	0.786|0.395	1.41	1.316|1.505	0.018	1|1	0.727|0.525	0.53	0.383|0.675	0.043	1|1	0.081|0.346	1.33	1.461|1.201	0.034	1|1	0.552|0.821	0.94	0.912|0.962	0.001	1|1	0.897|0.968	Unigene15554_17	KGTPAKNNQKKLGKTPVKEVPAKMVEEEEDDESEDEEDSGADVAEDVANEGGDSEAEDEEDDDDEEDEDDEEDDNDDDEDDDLVDNEAEEVKKDEAEDDNEEDNDDEEPVEAPIGKHSSESPAKVKSKKSKTSDETGVQKIKTGAPPKDFPQEQVLIVKNLPKHYKQIDIVEVFAKFGTLDTIYNIRGPASCVAYVAYTSPEEAEAAQVATNNIAKVKGAILKVNIQTPNPKKVKKTELKSKISEEKRESFEVNKKKIEESKNRTIYIKNLKIGTTEDQIRSHFANCGAIENIKLLTRGPTSSSFVCFEDESAVPSAMELHNSILNERNIWVHKSDEFNEKTKDPQRTILLKNKANLSNLESSKLEAIFSKCGEIEAYSILCKKTILAFITFKDQKAAK…	34.41	7e-49	gi|195391618|ref|XP_002054457.1|	GJ24466 [Drosophila virilis]	30.20	3e-37	sp|P13469|MODU_DROME	DNA-binding protein modulo OS=Drosophila melanogaster GN=mod PE=1 SV=2	34.41	2e-48
177	CL1067.Contig1_17	GK19740 [Drosophila willistoni]	52822.4228010001	0.027	1	1	-	1.3	1.484|1.123	0.065	1|1	0.541|0.891	0.97	0.947|0.988	0.001	1|1	0.956|0.988	1	1.051|0.946	0.006	1|1	0.963|0.944	1.29	1.196|1.389	0.019	1|1	0.762|0.443	0.76	0.833|0.678	0.012	1|1	0.813|0.569	0.75	0.639|0.865	0.026	1|1	0.432|0.839	CL1067.Contig1_17	IGGSGGVNGMLYVRGHSGDYDGWARVGNVGWGWNDVLPYFERSVRPVGNETHPQSYVTVNSFPVNDPDIEQMIYAGTAEMGVPRVHLFTAGSETGYSNLPGTIRNGRRMSTGKGYLAQAANRPNLQVIKNAHVTKLNFDETGKSVRSVSFTVQNERKMRVSVGKELVLSAGAIESPKLLMLSGVGPASHLEAVQIPLVHDLPVGDNLYDHVQVVTFLKLNEGVAYTVTPKDGFDSTYNYLIHRTGPLVSHGAASLTGFINTLRNSPYPDVEFHHFVLRRGDFAGLHTFFHGLNINDFFKAQIRNAIEVSDILSMFNVLSTPKSTGNVRLPSADYNDPPILTHNYFNDPEDLATLLRAIRFQEQLLKTAAYRSMNASLVLPTIDECDTYELQSDDYWRCY…	55.23	7e-152	gi|195396647|ref|XP_002056942.1|	GJ16799 [Drosophila virilis]	34.70	6e-68	sp|P18173|DHGL_DROME	Glucose dehydrogenase [acceptor] OS=Drosophila melanogaster GN=Gld PE=2 SV=3	55.23	3e-151
178	Unigene15121_17	185 1468 minus strand glutamate oxaloacetate transaminase 2 [Glossina morsitans morsitans]	47760.7327820001	0.227	7	13	-	0.91	0.895|0.934	0.001	10|12	0.056|0.333	1.11	1.112|1.100	0.000	13|13	0.312|0.524	1	0.957|1.034	0.003	12|10	0.673|0.710	0.98	0.982|0.969	0.000	13|13	0.866|0.765	1.13	1.124|1.141	0.000	13|13	0.312|0.292	1.11	1.112|1.100	0.000	13|13	0.448|0.545	Unigene15121_17	MANISGKTLLSANRAIGVALNANSARTQSWFAGVQMGPPDAILGVTEAFKRDTNPKKINLGVGAYRDDNGKPWVLPSVRKAEERIVSKQLDKEYATIIGIPNFYNKAIELALGKDSERLREKHNATTQSISGTGALRIGAAFLSKFWQGNREVYVPTPTWGNHVPIFEHSGLPIKKYRYYDPKTCGLDVQGCFDDISKIPEKSIVLLHACAHNPTGVDLSQEQWKELSQLIKKKNLFPFFDMAYQGFASGDVDRDAQAVRIFEKDGHLYCLAQSFAKNMGLYGERAGAYSVITASKEEADRVISQIKILIRALYSNPPINGARLAAEILNDQELRAIWLKDVKTMADRIINIRAQLKGNLVKLGSTRSWDHITNQIGMFCYSGMTAANVERLSKEFSIY…	73.49	0.0	gi|195115413|ref|XP_002002251.1|	GI13682 [Drosophila mojavensis]	65.16	3e-158	sp|P00507|AATM_RAT	Aspartate aminotransferase, mitochondrial OS=Rattus norvegicus GN=Got2 PE=1 SV=2	77.16	0.0
179	Unigene6372_17	GH22682 [Drosophila grimshawi]	10760.152831	0.315	2	14	-	0.9	0.885|0.911	0.000	14|12	0.377|0.186	0.92	0.917|0.916	0.000	14|14	0.038|0.166	0.85	0.868|0.837	0.000	13|14	0.040|0.032	1.04	1.010|1.064	0.001	14|14	0.935|0.503	0.88	0.913|0.854	0.002	14|14	0.007|0.003	1.05	1.013|1.080	0.002	14|12	0.962|0.203	Unigene6372_17	MAMPQISQADQAKLQLMQEMEIEMMSDLYNRMTNACHKKCIPPRYGEAELGKGEMVCIDRCVAKYLDIHEKIGKKLTAMSIQDEELMKRMSG	94.57	5e-37	gi|195057946|ref|XP_001995354.1|	GH22682 [Drosophila grimshawi]	92.39	4e-37	sp|Q9W2D6|TIM10_DROME	Mitochondrial import inner membrane translocase subunit Tim10 OS=Drosophila melanogaster GN=Tim10 PE=2 SV=1	94.57	2e-36
180	Unigene15615_17	GI21056 [Drosophila mojavensis]	18031.198474	0.125	2	8	-	1.34	1.351|1.320	0.000	7|7	0.040|0.006	1.15	1.164|1.127	0.001	8|8	0.314|0.162	1.16	1.146|1.171	0.000	7|8	0.094|0.346	1.09	1.076|1.110	0.001	8|7	0.745|0.613	1.13	1.048|1.208	0.013	8|7	0.761|0.053	0.91	0.949|0.879	0.002	8|8	0.799|0.267	Unigene15615_17	MSRNLLGVFLVCFCTGAALATTCTSPKVSVTSFSTQDATILTQVAHVGEFSLSCGNNAQPNLFAEFPCGKIVPVAQIGDGKYQVSWTQEIKKSGGGNVAVRLFDEEGYANIRKAQRDGDKVADVKSLVDITVATKSAYKGPWVQAELVAALAVGGIAYFAFTTKSKVQ	66.67	1e-62	gi|195123923|ref|XP_002006451.1|	GI21056 [Drosophila mojavensis]	38.10	2e-24	sp|Q62186|SSRD_MOUSE	Translocon-associated protein subunit delta OS=Mus musculus GN=Ssr4 PE=2 SV=1	66.67	4e-62
181	Unigene16173_17	1 227 LEN=227_ translated	8437.363831	0.368	1	1	-	2.38	2.619|2.132	0.119	1|1	0.109|0.186	1.34	1.659|1.020	0.204	1|1	0.375|0.986	1.23	1.247|1.209	0.001	1|1	0.793|0.810	1.92	1.778|2.060	0.040	1|1	0.206|0.098	0.69	0.580|0.802	0.025	1|1	0.364|0.773	0.55	0.631|0.469	0.013	1|1	0.417|0.200	Unigene16173_17	LNLQMSQAVVLGFFDAIQASMEAEALTKDNIRAAVRDLDRTNRNITAVLNRVHSSPKEQVPALCAEARIYFSAIQT	-	-	-	-	-	-	-	-	-	-
182	Unigene32382_17	GI12936 [Drosophila mojavensis]	12263.09859	0.087	1	2	Unigene32381_17	0.82	0.876|0.764	0.006	2|2	0.790|0.499	0.92	0.981|0.852	0.008	2|2	0.982|0.798	0.8	0.785|0.820	0.001	2|2	0.612|0.663	1.02	0.930|1.110	0.016	2|2	0.884|0.783	0.91	0.925|0.885	0.001	2|2	0.903|0.851	1.11	1.091|1.124	0.001	2|2	0.886|0.821	Unigene32382_17	QQQQQQHAHHRRRLQRDSTSKILNTREQCNSVRDYFETIDIKLSGNFEEKGAICGGHCCTNATELELRKKSTAEFERLLHHHTNSLRGILESTANLFQSKNLDL	67.53	6e-25	gi|195376007|ref|XP_002046788.1|	GJ13077 [Drosophila virilis]	60.00	3e-25	sp|Q24114|DALY_DROME	Division abnormally delayed protein OS=Drosophila melanogaster GN=dally PE=1 SV=1	67.53	3e-24
183	Unigene14399_17	GI16427 [Drosophila mojavensis]	9256.323126	0.959	6	57	-	0.81	0.797|0.824	0.000	54|56	0.001|0.001	0.83	0.935|0.724	0.022	54|53	0.059|0.001	0.75	0.743|0.757	0.000	55|57	0.001|0.001	1.09	1.095|1.091	0.000	56|55	0.005|0.020	0.79	0.722|0.854	0.009	55|56	0.000|0.001	1.01	1.087|0.926	0.013	53|56	0.079|0.169	Unigene14399_17	YKLETAPFDPRFPNQNVTRYCYQSYIDYHRCQKVRGENYEPCNYFKKVFQSMCPNAWVERWNDQREAGTFPGRI	87.84	1e-34	gi|195133654|ref|XP_002011254.1|	GI16427 [Drosophila mojavensis]	60.27	6e-21	sp|Q80ZN9|CX6B2_MOUSE	Cytochrome c oxidase subunit 6B2 OS=Mus musculus GN=Cox6b2 PE=2 SV=1	87.84	5e-34
184	Unigene15544_17	GJ17944 [Drosophila virilis]	29170.563001	0.036	1	4	-	0.99	0.977|1.001	0.000	4|4	0.922|0.999	0.88	0.870|0.880	0.000	4|3	0.481|0.700	0.9	0.872|0.921	0.001	4|4	0.433|0.754	1.13	1.103|1.162	0.002	4|3	0.749|0.350	0.85	0.927|0.779	0.011	4|4	0.840|0.153	0.94	0.882|0.998	0.007	4|4	0.538|0.995	Unigene15544_17	PEAKGKSAKKLPAVPESKLKFSKKQISKRAILIKRKLKRTAVVALRKRENLVRAEKYQAEYLRADRREIKLRRLAKKRGQFYVPAEAKLAFVIRIRGINKVAPKVRKVLQLFRLRQINNGVFIKLNKATINMLRIAEPYITWGYPNLKSVRELIYKRGFVKHNRQRVPITDNFVIERKLRKAHDIQCVEDLVHEIFAVGPNFKKASNFLWPFKLNTPTGGWRKKANHYVEGGDFGNREDKINKLLRNMV	88.76	5e-121	gi|195473517|ref|XP_002089039.1|	RpL7 [Drosophila yakuba]	88.35	3e-121	sp|P32100|RL7_DROME	60S ribosomal protein L7 OS=Drosophila melanogaster GN=RpL7 PE=2 SV=2	88.76	2e-120
185	Unigene14352_17	95 1171 minus strand cell membrane glycoprotein [Glossina morsitans morsitans]	39355.302153	0.067	2	3	-	1.89	1.807|1.965	0.012	3|3	0.014|0.098	1.49	1.267|1.710	0.098	3|3	0.279|0.031	2.28	2.327|2.242	0.004	3|3	0.101|0.050	0.84	0.893|0.788	0.006	3|3	0.645|0.492	1.7	1.825|1.579	0.030	3|3	0.005|0.044	0.78	0.743|0.815	0.003	3|3	0.338|0.719	Unigene14352_17	MFGRQSGIGGGNTSSSSNLVEFRAGRMNMIGKMVHPDARKGLLYLTQNEDGLMHFCWKDRTTGKVEDDLIVFPDDFEFKRVEQCKTGRVYVLKFKSSSRRMFFWMQEPKVEKDDELCRRVNELMNNPPSQQRNNSDNGDLQYMLNNMSQQQLMQLFGGVGQMGGLTSLLGSMNRSENSSRTPARSTSNTASNLLTPESNTAPKTPSAPKGKGNSRSAAGATATNPNTNLSTTGSRTLSVDLSTAITGSEAINQIISDPERAKTLSVHLPEGEEADENKKQQIKDTIASPQFQQALSLFSNALQSAQLGPVVSQFELTSDAVAAAYAGNLEDFVKALEKSLPPGATMDTSKTKESEKDEE	69.53	4e-124	gi|194757784|ref|XP_001961142.1|	GF11152 [Drosophila ananassae]	69.41	3e-122	sp|Q7K2G1|ADRM1_DROME	Proteasomal ubiquitin receptor ADRM1 homolog OS=Drosophila melanogaster GN=CG13349 PE=1 SV=1	71.23	1e-129
186	Unigene29227_17	GF19818 [Drosophila ananassae]	24846.170647	0.164	2	5	-	1.18	1.126|1.225	0.005	5|5	0.582|0.120	0.86	0.798|0.917	0.007	5|5	0.089|0.659	1.24	1.286|1.197	0.004	5|5	0.230|0.512	0.96	1.041|0.871	0.014	5|5	0.892|0.765	0.93	0.971|0.892	0.003	4|5	0.916|0.595	0.73	0.719|0.736	0.000	5|5	0.014|0.065	Unigene29227_17	MSSYSHADPIALSFNDTCLRMSDVQLLQGPHWLNDQILSFYYEYLEKVKYKNNPDLLFVAPEVTQCMKLTDDDALETVLNQLEAPRKQFIFFALNDNESTQAGGTHWSLLVFSRPEKTFFHFDSWGNNNSLASQQFAHQIKVALNCRQCHIKPIRCLQQANGYDCGIHVICMTDNIADYVNRYECVEGVGPLHQDIISAKRSELLKLIQSLGGK	72.90	2e-89	gi|194754207|ref|XP_001959387.1|	GF19818 [Drosophila ananassae]	38.39	1e-35	sp|Q5FVJ8|SENP8_RAT	Sentrin-specific protease 8 OS=Rattus norvegicus GN=Senp8 PE=2 SV=1	72.90	7e-89
187	Unigene15512_17	GI24500 [Drosophila mojavensis]	17500.701613	0.045	1	1	-	2.12	2.415|1.821	0.176	1|1	0.144|0.291	1.27	1.460|1.079	0.073	1|1	0.518|0.941	2.8	2.683|2.907	0.025	1|1	0.137|0.095	0.76	0.618|0.909	0.042	1|1	0.350|0.868	1.64	1.671|1.610	0.002	1|1	0.392|0.465	0.61	0.656|0.571	0.004	1|1	0.459|0.349	Unigene15512_17	MADTQAKPAAVAASKAPKAAKAPKAKAPKIEKPTAPVAALKYKRHGRLFAKAVFTGYKRGLRNQHESQAILKIEGARRKEHGQFYIGKRCVYVYKGKTKKCVPQHPERKTRIRAIWGKVTRLHGNTGSVRARFNRNLPGHAMGHRIRIMLYPSRI	90.76	2e-60	gi|195497343|ref|XP_002096058.1|	GE25280 [Drosophila yakuba]	61.82	9e-34	sp|Q5R8K6|RL35A_PONAB	60S ribosomal protein L35a OS=Pongo abelii GN=RPL35A PE=3 SV=1	90.76	7e-60
188	Unigene229_17	52 930 minus strand mucin-12 precursor [Homo sapiens]	30458.961665	0.051	1	3	-	1.07	1.122|1.012	0.006	3|3	0.786|0.993	0.83	0.906|0.763	0.010	3|3	0.843|0.680	1.16	1.194|1.122	0.003	3|3	0.830|0.897	0.93	0.911|0.945	0.001	3|3	0.724|0.865	0.9	0.857|0.949	0.004	3|3	0.885|0.959	0.79	0.823|0.755	0.002	3|3	0.406|0.220	Unigene229_17	VIQEIRLVETKLIQTATNVPLKINAAIGSDLNLTLSKKNTQQQATQKAQTAHTAHHKPQLTIVNAQTTSIAPHTLPLSAKTKQINVGKPVAGLSRDANLSSPVSNSRNNLQNPQLITPQKEQGSEATQHNLPLITQTQTKPFETLNTNGNRLSAALVSNKAYTVTQKSQPSTLIAQVSHIPQNTASSATQTQMKLQKPFDALSTNANQLSPVLAPNEASSAPPSSTSNGGKAKTPTIGAFGNANSSQGPAKTGTNAFAKPSSSQPSGGAKGSINGISTPKTQLTTPALNTGNT	-	-	-	-	-	-	-	-	-	-
189	Unigene70_17	1230 1886 Rab protein 5 [Glossina morsitans morsitans]	24385.206391	0.251	4	6	-	2.19	2.149|2.230	0.003	6|5	0.027|0.001	1.34	1.182|1.507	0.053	6|5	0.217|0.012	2.11	2.074|2.151	0.003	6|5	0.079|0.001	1.09	1.127|1.044	0.003	5|6	0.315|0.901	1.26	1.262|1.259	0.000	6|5	0.212|0.219	0.65	0.586|0.714	0.008	6|5	0.001|0.013	Unigene70_17	TTARSGGNASGSTAQRPNGTQQNKNCQFKLVLLGESAVGKSSLVLRFVKGQFHEYQESTIGAAFLTQTICIEDTVVKFEIWDTAGQERYHSLAPMYYRGAQAAIVVYDIQNQDSFQRAKTWVKELHKQASPNIVIALAGNKADLSNIRVVEYEEAKQYAEENGLLFMETSAKTGMNVNDIFLAIAKKLPKNDGAHNQGAPAGRRLNDNENNRQTNNCCK	91.78	7e-113	gi|125985719|ref|XP_001356623.1|	GA17598 [Drosophila pseudoobscura pseudoobscura]	75.48	2e-88	sp|Q5ZHW4|RAB5B_CHICK	Ras-related protein Rab-5B OS=Gallus gallus GN=RAB5B PE=2 SV=1	94.06	2e-117
190	Unigene14905_17	GJ12790 [Drosophila virilis]	26251.434779	0.369	5	15	-	0.91	0.929|0.885	0.001	15|14	0.580|0.046	0.66	0.644|0.684	0.001	12|15	0.001|0.001	0.94	0.915|0.955	0.001	15|14	0.425|0.416	0.97	0.935|1.008	0.003	15|15	0.460|0.945	0.7	0.743|0.665	0.003	15|14	0.001|0.000	0.75	0.754|0.743	0.000	15|13	0.001|0.001	Unigene14905_17	VLTIVSYVRASSNGVDYVATPLLRTYPYAYSAHSSSLVTPTQQQYHTQDGLGQYAYGYAEPHSTKQEVRSQDGITRGSYSYRDATGELQTVDYTADDKGFRVAATNLPITVAGDQSVQQPFRGATPSGGVAIAAGIGAARVVHLAGHKEALLRLAAGGIISGEPIATVSDTRSVQLSQPVDDTIAVAAAKASQLNSHDPEKQLHKIIQHGRIITPAIVQVPATIRTSVIPNVYNYGYPWRYFYY	43.73	2e-36	gi|195374888|ref|XP_002046235.1|	GJ12790 [Drosophila virilis]	45.78	2e-10	sp|P82119|CUO6_BLACR	Cuticle protein 6 OS=Blaberus craniifer PE=1 SV=1	43.73	8e-36
191	CL3684.Contig2_17	GI20208 [Drosophila mojavensis]	14101.206445	0.070	1	4	CL3684.Contig1_17	1.31	1.219|1.400	0.016	3|4	0.371|0.047	1.26	1.246|1.283	0.001	4|4	0.178|0.172	1.55	1.568|1.523	0.001	4|4	0.015|0.014	0.88	0.923|0.836	0.004	4|4	0.625|0.278	1.46	1.384|1.537	0.012	4|3	0.037|0.059	0.91	0.932|0.896	0.001	4|4	0.825|0.535	CL3684.Contig2_17	MENPNEFPAPSGSTDPSNNNQSQKRLQQTQAKVDEVVGIMRVNVEKVLERDQKLSELGERADALEAGASQFEQQAGKLKRKQWWANMKMMIIMGVIGVVLLIIIIVSFLPSGSSSSEPHNQIQNTPAP	86.36	6e-33	gi|221330128|ref|NP_001137634.1|	synaptobrevin, isoform D [Drosophila melanogaster]	80.46	2e-31	sp|P18489|SYB_DROME	Synaptobrevin OS=Drosophila melanogaster GN=Syb PE=2 SV=3	86.36	7e-32
192	CL2040.Contig2_17	GF16094 [Drosophila ananassae]	88563.3202849999	0.048	3	10	CL2040.Contig1_17	1	0.958|1.042	0.004	10|10	0.684|0.647	1.12	1.084|1.153	0.002	9|10	0.294|0.351	1.08	1.055|1.113	0.002	10|10	0.808|0.193	0.94	0.960|0.928	0.001	10|9	0.825|0.321	1.19	1.167|1.221	0.001	10|9	0.072|0.010	1.1	1.093|1.110	0.000	9|10	0.224|0.544	CL2040.Contig2_17	MQTVIKNPNWWRRRTTLERCLVLISIIALIAVVGLVIGLVSVILSNRLTEELKATTNSPEALQGAGRTTDNEVFMPPQKLPKDDVCLSPECIHTSSAVLSKMKPEVEPCDDFYQFVCGTYIEENLIPDDKDSLNTFSLISDKLHEQLKEIITEERPTTEHKHFQLPNALYRACMNKALIEELGTKPIADIAKKLGGWPVIEGGSWNADDSWTWQETVKKFRRVGFSMDYIIDFSVSVDLKNSTKRIIDFDQSAIGLSREYLVKGFNETLVSSYYDYMVDMAVLFGADKGRAKRELRESLDFEIALANISWPAEKRRNTNDLYNIRTLKQLQEAYPYVQWVDYTNALLPDKLKVTEDEPVNLSVPSFFEDLAPLLERTPNRVIANYMMWRIHAFSIVFLS…	73.45	0.0	gi|194746532|ref|XP_001955734.1|	GF16094 [Drosophila ananassae]	37.57	4e-141	sp|Q495T6|MMEL1_HUMAN	Membrane metallo-endopeptidase-like 1 OS=Homo sapiens GN=MMEL1 PE=1 SV=2	73.45	0.0
193	Unigene36280_17	AChE protein [Bactrocera dorsalis]	24930.593426	0.070	1	1	-	0.67	0.575|0.755	0.016	1|1	0.364|0.664	0.79	0.762|0.817	0.002	1|1	0.667|0.812	0.7	0.549|0.841	0.043	1|1	0.368|0.832	0.97	0.897|1.034	0.009	1|1	0.872|0.949	0.82	0.917|0.728	0.018	1|1	0.930|0.640	1.17	1.258|1.077	0.016	1|1	0.740|0.922	Unigene36280_17	ASSPRLSGDIGRGLFAIVVLLLRMSSAYGVIDRLVVQTSSGPVRGRSVTVQGREVHVYAGIPYAKPPLDDLRFRKPVPAEPWHGVLDATRLPPTCVQERYEYFPGFTGEEIWNPNTNVSEDCLYINVWAPAKARLRHGRGANGGEHSNKADTDHLIHNGNPQNTTNGLPVLIWIYGGGFMTGTATLDIYNADIMSAVGNVIVASFQYRVGAFGFLHLSPAMPGYEEEA	98.25	4e-131	gi|375335033|gb|AFA53637.1|	acetylcholinesterase [Bactrocera dorsalis]	90.15	5e-106	sp|P07140|ACES_DROME	Acetylcholinesterase OS=Drosophila melanogaster GN=Ace PE=1 SV=1	98.25	1e-130
194	Unigene15066_17	GH23924 [Drosophila grimshawi]	52924.957894	0.041	1	1	-	0.8	1.014|0.590	0.090	1|1	0.984|0.351	0.55	0.748|0.348	0.080	1|1	0.637|0.147	0.82	0.295|1.350	0.557	1|1	0.078|0.667	1.89	0.419|3.355	4.310	1|1	0.104|0.025	0.54	0.848|0.228	0.192	1|1	0.837|0.083	0.68	0.745|0.617	0.008	1|1	0.638|0.436	Unigene15066_17	MNVMIKRSATAGLQILRPQAIPAVGCNLGSGKQQTRGAAKWYPDPEFMKQFSGPVMYPDESTALMKLPPWNSKILPVEKSVRNLTINFGPQHPAAHGVLRLVLELDGETVVRADPHIGLLHRGTEKLIEYKTYMQALPYFDRLDYVSMMCNEQCYSLAIEKLLNIEVPIRAKYIRTLFAEITRILNHIMAVGTHALDVGAITPFFWLFEEREKMMEFYERVSGARMHAAYIRPGGVALDMPLGLMDDIYEFASKFAERLDEVEDVLTTNRIWVQRTADIGIVSAEDALNYGFSGVMLRGSGIKWDLRKQQPYDAYDLVDFDVPIGTKGDCYDRYLCRVEEMRQSLRVIDQCLNQMPAGEIKIDDAKITPPTRGEMKNSMEALIHHFKLFTQGYQVPPGA…	88.46	0.0	gi|195064427|ref|XP_001996567.1|	GH23924 [Drosophila grimshawi]	76.75	0.0	sp|Q641Y2|NDUS2_RAT	NADH dehydrogenase [ubiquinone] iron-sulfur protein 2, mitochondrial OS=Rattus norvegicus GN=Ndufs2 PE=1 SV=1	88.46	0.0
195	Unigene747_17	AGAP005809-PA [Anopheles gambiae str. PEST]	25140.069924	0.201	2	9	-	1.11	1.284|0.936	0.061	9|7	0.001|0.470	0.89	0.924|0.853	0.003	9|9	0.420|0.040	0.95	0.984|0.921	0.002	9|9	0.904|0.356	1.2	1.116|1.287	0.015	9|9	0.043|0.002	0.75	0.794|0.715	0.003	8|9	0.002|0.008	0.78	0.727|0.826	0.005	9|9	0.001|0.017	Unigene747_17	DSPDAKKPCKGILKNSSSFDKPGAASYRKSAKFDELNVLQTYHPHDKDYGHMKIDEPKTPYNYVIPDLAHTDALDANLLAEKLRIAASTQSPAFGSEDISDEENIDETPEEKVRRLEFERRRKAHYNEFEAVRLARKLIEEELGEEDDENDISSIGEDVKSLTSAEKSNNEEVEIQSEHTEQEALPESAVEKETGTTEQDSELDSSDSNRASATNMDVDGQLQP	70.14	2e-43	gi|108876670|gb|EAT40895.1|	AAEL007410-PA [Aedes aegypti]	40.91	1e-21	sp|P11845|IPP2_RABIT	Protein phosphatase inhibitor 2 OS=Oryctolagus cuniculus GN=PPP1R2 PE=1 SV=3	70.14	7e-43
196	Unigene21663_17	GD18840 [Drosophila simulans]	25337.024505	0.178	2	4	-	0.9	0.833|0.959	0.008	4|4	0.256|0.905	0.91	0.905|0.914	0.000	4|4	0.694|0.724	0.83	0.903|0.763	0.010	4|3	0.563|0.210	1.01	1.107|0.913	0.019	4|4	0.721|0.463	0.91	0.841|0.977	0.009	4|4	0.286|0.950	1	1.057|0.947	0.006	4|4	0.863|0.845	Unigene21663_17	MAKNKSTVYLGFEDEEVTSKHGSILNSTVNKIGGTPDWPTGEIKVPSCPLCGTARPLIVQLYAPLEQSKFHRTLYVFACLNPACSQDCKSWLCIRTQHLDTPSEAELINAVPPPLTAGGGSGKKKKNYKQAANAMQPQKIAWCSGADDWGETLEENSTLADTGVERMDTGADELQHQNEENGNVIGKNDNSPTRAVHLPRADTGNSDADEDDDDESNSMDNELVYGFGQL	56.38	1e-50	gi|195500504|ref|XP_002097402.1|	GE26201 [Drosophila yakuba]	37.42	9e-16	sp|Q9BRP1|PDD2L_HUMAN	Programmed cell death protein 2-like OS=Homo sapiens GN=PDCD2L PE=1 SV=1	56.38	3e-50
197	Unigene31532_17	GF14671 [Drosophila ananassae]	33964.271592	0.081	1	1	-	1.11	0.991|1.230	0.029	1|1	0.989|0.776	0.62	0.726|0.509	0.024	1|1	0.592|0.327	1.38	1.363|1.403	0.001	1|1	0.686|0.617	0.8	0.880|0.729	0.011	1|1	0.850|0.463	0.78	0.601|0.968	0.067	1|1	0.396|0.976	0.58	0.735|0.416	0.051	1|1	0.618|0.165	Unigene31532_17	LLLFSHVNANGYHYGPPTQPSAPARPPPNSNSGHYFGTIPTTAPLPPVPALPALPTGRPRVENFLPAAPPSRTQTQTIIQVHPSTSAAPQQLRPSSPYNSFAGGYGEPQPQAQPPQGGGYFYLPPTGSAPSAPSAPGRFPAGPLQPQPLRVPFGQQAIYKIGNGIGPDGDFYVVNGRQLKQYAVVEYVDNDISQDTKPFLSQSFLNNYRALVGASGTGAIAPLPSAMQLDSTANAILREQQRLAFRGATSRGDTIALGSGGIGFVRLPDGSVTLGSGSLNFVTGQQHLADLRNARTRSESQRDPLHFGHGPLEDPNNRFLF	54.91	3e-44	gi|195117304|ref|XP_002003189.1|	GI17778 [Drosophila mojavensis]	-	-	-	-	54.91	1e-43
198	CL1819.Contig1_17	GH17270 [Drosophila grimshawi]	32611.403399	0.077	2	2	Unigene14538_17;CL1819.Contig4_17;Unigene14537_17;CL1819.Contig3_17;CL1819.Contig2_17;Unigene14536_17	1.11	1.034|1.195	0.013	2|2	0.968|0.697	1.03	1.045|1.012	0.001	2|2	0.956|0.987	1.44	1.330|1.556	0.026	2|2	0.522|0.229	0.78	0.766|0.793	0.000	2|2	0.445|0.416	1.3	1.295|1.307	0.000	2|2	0.536|0.578	0.92	1.007|0.830	0.016	2|2	0.990|0.701	CL1819.Contig1_17	MAEGNGELVDDINQKSEDRGDGERTEDYPKLLEYGLDKKVAGKLDDIYKTGKLAHVELDERALDALKEFPVDGALNVLSQFLESNLEHVSNKSAYLCGVMKTYRQKSRASQQGVPTPATTVQVKGPDEEKIKKILERTGYSLDVTTGQRKYGGPPPNWDGPTPGNGCEVFCGKIPKDMFEDEIIPLFEECGTIWDLRLMMDPMTGTNRGYAFVTFTTREAASNAVRQLNDFEIRKGKKIGVTISFNNHRLFVGNIPKNRDRDELIEEFTKHARKWYISKSUPKTKKK	89.62	5e-151	gi|195055139|ref|XP_001994478.1|	GH17270 [Drosophila grimshawi]	61.04	9e-86	sp|O43390|HNRPR_HUMAN	Heterogeneous nuclear ribonucleoprotein R OS=Homo sapiens GN=HNRNPR PE=1 SV=1	89.62	2e-150
199	Unigene36344_17	GJ23493 [Drosophila virilis]	73357.4018700001	0.021	1	3	-	0.97	0.969|0.969	0.000	3|3	0.922|0.928	0.81	0.862|0.750	0.006	3|3	0.606|0.259	1.03	0.976|1.084	0.006	3|3	0.945|0.760	0.94	0.894|0.982	0.004	3|3	0.610|0.934	0.86	0.847|0.867	0.000	3|3	0.435|0.637	0.82	0.877|0.768	0.006	3|3	0.664|0.225	Unigene36344_17	LGRQFSYSCPNTTLFQQRMLICDHWYMVNCSRAESDYAANLLIGQRDKPFVNDEENSLRTPRPDLLDRPYAPDYSGESFRNQYKQLPTIPNQIQVSDTPKVQDKFTAVTQLTPGQQHWKIPSPSRTILPPAYEAQISEDSISQTNSENIRFAPKTTQPSAPTIAKTTFNQPKFSSQTVIATTSAGRFNSAALHQRGQSGEREDLGTSHSTRYNTSSDFNSVEQSNSKSADVLNKDNAKSTITSTRLTVTTTPATVFTSTTTRTPMSTTNTVVNTNVSYKIPSKVYEPPFLYPIYNENDTVSSQTSLRTSSATPFISSPAFAKYTSTTPIPTPNRPTTLAGKPFTVSNGGITTKAPSFSGRSQNNLIQTSFGESSKDIRTPTPAHGFKPPTPRPPVSTTT…	45.55	4e-131	gi|195389000|ref|XP_002053166.1|	GJ23493 [Drosophila virilis]	-	-	-	-	45.55	1e-130
200	Unigene30154_17	AGAP013067-PA [Anopheles gambiae str. PEST]	13882.658682	0.088	1	3	-	1	1.027|0.974	0.001	3|3	0.939|0.941	0.7	0.814|0.584	0.026	3|3	0.376|0.028	1	0.967|1.027	0.002	3|3	0.942|0.929	1	0.952|1.050	0.005	3|3	0.861|0.882	0.7	0.630|0.768	0.010	3|3	0.027|0.269	0.69	0.789|0.599	0.018	3|3	0.280|0.026	Unigene30154_17	QQQQQQQYVSQQDYQQQLLRQLYNEHRPTAAAFNAGGSHQTSPIYTSSDYANYMQRQQQFAERQYGTAPTAATYAANNGLSTSPIPSTLGSGSTTTTEKLLGVQYSPSDKVSHVKFSSGNLRYNF	-	-	-	-	-	-	-	-	-	-
201	Unigene7295_17	GK17370 [Drosophila willistoni]	13871.318512	0.403	4	18	-	0.93	0.896|0.972	0.003	18|17	0.198|0.835	0.93	0.923|0.942	0.000	18|17	0.267|0.460	1.04	1.003|1.073	0.002	17|15	0.991|0.417	0.89	0.910|0.865	0.001	16|17	0.010|0.003	1.04	1.033|1.038	0.000	17|18	0.723|0.740	0.96	0.994|0.932	0.002	17|16	0.941|0.078	Unigene7295_17	MRLSTYNFLTSKAIKGVKVGFPLKLTIAKQDVVEAEFNPTFIERLLPRLDWSGIRYAAEVAALADDIPAELPANVAENEELLKKLHHLLLEIDVLEGQLECPETGRVFPISDGIPNMLLNEDEV	79.03	4e-46	gi|195477060|ref|XP_002086290.1|	GE22955 [Drosophila yakuba]	79.84	7e-46	sp|Q9VP65|TR112_DROME	TRM112-like protein OS=Drosophila melanogaster GN=CG12975 PE=2 SV=1	79.03	2e-45
202	Unigene30344_17	GI11426 [Drosophila mojavensis]	27841.233506	0.064	1	1	-	1.31	1.042|1.569	0.139	1|1	0.966|0.436	1.19	0.936|1.439	0.127	1|1	0.943|0.632	1.36	1.320|1.391	0.003	1|1	0.729|0.628	1	1.191|0.806	0.074	1|1	0.800|0.660	1.16	1.184|1.139	0.001	1|1	0.833|0.885	0.88	0.909|0.852	0.002	1|1	0.895|0.831	Unigene30344_17	VEVRDKVLSITFDNPKKFNSIDRNGYRALGLVLREVVKDDNVTIVVITGKGNFFTSGNDLSQAMDGASDIEAHIKESVDIYKEMVSALIDCPKLTLALVNGPCIGIGATLAALCDIVWCSSNAYFLTPFTKLSIVPESCSSYLFPLILGRSKANEMLLLSQKLSAQEAYNFNFVSKVFEDTSLDSDIWPKIMELSELPPGSLQISKSLIRMHEKEALFRALNAESEELCKRFSTDEFLNALSAFAARKN	54.62	2e-75	gi|195129385|ref|XP_002009136.1|	GI11426 [Drosophila mojavensis]	39.76	3e-48	sp|Q9WUR2|ECI2_MOUSE	Enoyl-CoA delta isomerase 2, mitochondrial OS=Mus musculus GN=Eci2 PE=1 SV=2	54.62	5e-75
203	Unigene27240_17	GL13619 [Drosophila persimilis]	10582.036775	0.137	1	4	-	0.85	0.751|0.943	0.018	3|4	0.192|0.791	0.73	0.771|0.691	0.003	3|3	0.225|0.135	0.9	0.845|0.949	0.005	4|3	0.286|0.856	0.95	0.986|0.910	0.003	4|4	0.957|0.485	0.79	0.724|0.858	0.009	4|4	0.039|0.447	0.87	0.994|0.740	0.032	4|4	0.985|0.070	Unigene27240_17	QQQQQQQSHHQQQSLDPAAAAFHEHQRLVHQQLGDDTPLRIFVPDDEVAGEARLQKRSDVVKKGTVEDANTSNDNTTADDDLFEVSSSVEVSNEN	78.85	2e-16	gi|198449781|ref|XP_001357718.2|	GA12419 [Drosophila pseudoobscura pseudoobscura]	-	-	-	-	78.85	8e-16
204	Unigene7017_17	GJ17670 [Drosophila virilis]	48282.3511430001	0.050	2	5	-	0.92	0.885|0.947	0.002	5|5	0.360|0.741	0.76	0.824|0.693	0.009	3|5	0.420|0.046	1.13	1.114|1.140	0.000	3|5	0.681|0.260	0.81	0.828|0.792	0.001	5|3	0.088|0.135	0.94	0.845|1.035	0.018	5|5	0.139|0.912	0.82	0.912|0.730	0.017	5|5	0.620|0.021	Unigene7017_17	VVSLLLGYVAAQDKNITCISCNNADSCLQNITATDIKTCEAKTCYTQINVNLTISRGCLEDNKVNDCKAPSCISCSGGDKCNNQNICKSCNSDDDPKCAQTDASTANNAICDKTDSKCMISVLQNKTERGCVTDEIAKTCTDEKKCKMCTGGACNLGIFPEDRRKCFQCNDTIAACANVQGSSVALPCTQYEENDNCYMYGSDEAHVTRGCLSDVGEQNKCAKSDEKCKICNANACNDLNYKIEQSLLCVNCSDKDQCPWGQQASSAKSCEQKIIYSAEGKCYTRTDENGVVTRGCFYDLDDAGQKACVAGTNCTTCTNANGCNNFDAQNFTCIRCRSDENDNCRYLSTKITGEKCKNLVKSNADMKCFTGVWKTNLVIRGCLIDLEERDQFICNDPDN…	31.27	5e-35	gi|195387948|ref|XP_002052654.1|	GJ17670 [Drosophila virilis]	-	-	-	-	31.27	2e-34
205	Unigene9926_17	GJ18000 [Drosophila virilis]	11716.078139	0.133	1	1	-	0.94	0.804|1.066	0.034	1|1	0.759|0.941	1.04	0.978|1.094	0.007	1|1	0.983|0.928	0.97	0.851|1.091	0.029	1|1	0.869|0.917	0.97	0.987|0.946	0.001	1|1	0.987|0.924	1.06	1.102|1.026	0.003	1|1	0.917|0.979	1.09	1.167|1.008	0.013	1|1	0.837|0.995	Unigene9926_17	YATKQWSGIVIDYYRPRWAIFLQMLQKSLELDEKFNEEAFKRIISQEIENPFSISIKVYPSEPVGDSFTVAQQIFFKWATHADDSRFKKYCIKPIRIV	39.80	2e-20	gi|195398029|ref|XP_002057627.1|	GJ18000 [Drosophila virilis]	39.74	9e-11	sp|P54802|ANAG_HUMAN	Alpha-N-acetylglucosaminidase OS=Homo sapiens GN=NAGLU PE=1 SV=2	39.80	8e-20
206	CL2849.Contig2_17	GA24651 [Drosophila pseudoobscura pseudoobscura]	70761.308021	0.183	8	30	CL2849.Contig1_17	2.82	3.049|2.597	0.102	28|30	0.001|0.001	1.79	1.732|1.855	0.008	30|30	0.001|0.001	1.78	1.794|1.764	0.000	29|29	0.001|0.001	1.59	1.528|1.643	0.007	30|27	0.001|0.001	1.15	1.180|1.124	0.002	29|30	0.000|0.000	0.65	0.650|0.656	0.000	28|30	0.001|0.001	CL2849.Contig2_17	MMLRRLLLVLLVSISSSVTIVSAGSYPNYHAHFDFIAWDKHRTVAQLNAAQKWWQSAAFYQIYPRSFKDSNGDGVGDLKGIAEQLPYLKEIGIAATWISPIYTSPMADFGYDVADFTDIDPIFGTLDDFDALIAKSREVGVKIILDFVPNHSSDEHEWFKKSAAGDKDFKDFYVWHPGRLVNGTRQPPTNWMSVFRGSAWQWHETRKEYYLHQFLSKQPDLNYRNPKLRAAMSDVLRFWLRQGVAGFRIDAVPFVFEIVPDANGNWPDEPRNDWVIDPDDYNYVKHIYTVDQPETLDLVYEWRRVLDEFQKENGGDERVILTEAYSPIDVVMKYFGNDTAEGAQIPFNFLMINWLSNDSDAYHFAETVNTWLKSMPAGRTANWVIGNHDQNRVGSRLGA…	64.86	0.0	gi|198456378|ref|XP_002138230.1|	maltase A5 [Drosophila pseudoobscura pseudoobscura]	62.79	0.0	sp|P07192|MAL3_DROME	Maltase A3 OS=Drosophila melanogaster GN=Mal-A3 PE=2 SV=2	64.86	0.0
207	CL784.Contig6_17	GH11364 [Drosophila grimshawi]	127954.792926	0.006	1	1	CL784.Contig5_17;CL784.Contig4_17;CL784.Contig3_17;CL784.Contig2_17;CL784.Contig1_17	2.1	2.241|1.967	0.038	1|1	0.185|0.235	0.54	0.586|0.484	0.005	1|1	0.344|0.314	1.48	1.448|1.520	0.003	1|1	0.618|0.512	1.45	1.365|1.532	0.014	1|1	0.579|0.303	0.4	0.407|0.384	0.000	1|1	0.162|0.175	0.28	0.312|0.251	0.002	1|1	0.125|0.088	CL784.Contig6_17	TSSPSRSSIPEDLIILSTDSLAERVRKMNLLKKQRQSSRESSRERSIPKKSDDDSESKAPPDRPERSKSATSLAEVISKRNSLPPKKVTTSSTASTSSSTSTTPSAASAGITARPVSTASSTTNGARTNSTSSTAKSSTSTSTTTTTKQQKEEARRLKSAEDVEFMLKIKDTKYAHKRQTHDNSSLTTETTETTLVGPNDRELQDELKRLRDDYEAMKLRAERAEREKSDILLRRLASMDTASNRTAASEALALQQKVNEMKEQLEKVNEEKRKLNTRMKEIENNPRGNEYELKRKLQAAEQLCEELMEENQDAKKEIINLQAEMDELQDTYRDDEVKAKTNLQKELENMTKNCRILNFKLKKYERKVEIMEQEKSNNYNTDLMTKVNKLEEELRFANE…	61.12	0.0	gi|442626472|ref|NP_001260169.1|	CG18304, isoform C [Drosophila melanogaster]	34.29	2e-07	sp|Q6NZL0|SOGA3_MOUSE	Protein SOGA3 OS=Mus musculus GN=Soga3 PE=2 SV=2	58.60	3e-143
208	Unigene14899_17	132 2450 gamma-glutamyl phosphate reductase [Glossina morsitans morsitans]	84586.916845	0.043	2	2	-	1.24	1.183|1.293	0.006	2|2	0.739|0.524	1.04	1.012|1.077	0.002	2|2	0.991|0.920	1.15	1.159|1.140	0.000	2|2	0.801|0.801	1.12	1.202|1.040	0.013	2|2	0.683|0.924	0.95	0.911|0.988	0.003	2|2	0.881|0.989	0.85	0.897|0.795	0.005	2|2	0.856|0.640	Unigene14899_17	MFLNKSLVLVNQLKHSFSTIAWRAASLQGPRQPNILTEKRKQATFTERSQLKYARRLVVKLGSAVITREDNHGLALGRLASIVEQVAECHLEGREVMMVTSGAVAFGSQKLAQELLMSLSMRETLSPKDPTRVEQGTLLEPRAAAAVGQSGLMSLYDAMFAQYGVKIAQVLVTKPDFYNEETRNNLFCTLSELISLNIVPIINTNDAVSPPMFLKDDDLPVGSKKGIAIKDNDSLAAMLSAEVQADLLILMSDVDGIYNKPPWEDGAKLMHTYTSNDRHVIEFGKKSKVGTGGMDSKVKAATWALDRGVSVVICNGMQEKAIKTIIAGRKVGTFFTESTEGFSTPVDVLAENARIGSRQMQALSPEQRANAVNHLADLLVSREEFILQANAKDLAEAKR…	84.92	0.0	gi|195440440|ref|XP_002068050.1|	GK10672 [Drosophila willistoni]	59.26	0.0	sp|Q9Z110|P5CS_MOUSE	Delta-1-pyrroline-5-carboxylate synthase OS=Mus musculus GN=Aldh18a1 PE=2 SV=2	86.34	0.0
209	CL1439.Contig1_17	GG11250 [Drosophila erecta]	13802.288305	0.782	7	71	-	0.85	0.836|0.857	0.000	66|71	0.001|0.001	0.8	0.772|0.834	0.002	66|67	0.001|0.001	0.84	0.870|0.813	0.002	70|71	0.001|0.001	1.03	1.082|0.984	0.005	68|71	0.008|0.621	0.77	0.773|0.771	0.000	69|69	0.000|0.000	0.93	0.893|0.963	0.002	65|68	0.001|0.441	CL1439.Contig1_17	NSHRKPIPSVKYKDIKELPNHPEKLLVDVREQQELEETGKIPTSINIPLDSVVRVLAEDVRPQKFLSKYGRRKPTFDDEIIFTCKLGKRALKAAEIANAMGFSNVKYYKGSWEDWTKNE	55.93	3e-29	gi|195445196|ref|XP_002070217.1|	GK11151 [Drosophila willistoni]	50.00	2e-25	sp|P22978|HS6B_DROME	Heat shock protein 67B2 OS=Drosophila melanogaster GN=Hsp67Bb PE=2 SV=1	55.93	1e-28
210	Unigene17843_17	CG42342, isoform E [Drosophila melanogaster]	49475.3920499999	0.073	1	1	Unigene17842_17;CL18.Contig4_17;CL18.Contig3_17;CL18.Contig2_17;CL18.Contig1_17	1.73	1.839|1.617	0.025	1|1	0.320|0.402	0.95	0.891|1.006	0.007	1|1	0.871|0.996	1.51	1.746|1.268	0.114	1|1	0.412|0.754	1.19	1.319|1.053	0.035	1|1	0.626|0.930	0.81	0.779|0.844	0.002	1|1	0.732|0.843	0.56	0.523|0.602	0.003	1|1	0.277|0.401	Unigene17843_17	PELDTGDLHNQPEEPPKQMSVDVTQTLQRLSQQVSDLHRLRRDVSHLQMSRRQQQRRQASLAAATTTDGLLLQTPQQTHSGECGCTTGPPGPPGPPGKRGKRGKKGDPGEKGDPGVNGVNGEKGAAGRPGDKGQKGDVGHPGIDVFQTVKGEPGEPGPPGPPGPSGEPGSPGMNGGRGPPGETGTAGPAGPPGEPGPIGPPGAPGTLGPKGDKGDRGDRGLTTTIKGDEFPTGIIEGPPGPPGPPGPPGVPGDRGEVGPAGPPGPPGEKGPRGKRGKRIFGPGGAKDEDYDDPPVQLLRGPPGPPGMPGKDGREGRDGSKGDAGEPGEPGSLGPRGLDGLPGEPGIEGPPGLPGYQGPPGEKGDRGDIGPPGLMGPPGLPGPPGYPGVKGDKGDRGDSK…	90.82	5e-34	gi|195056121|ref|XP_001994961.1|	GH13124 [Drosophila grimshawi]	90.69	4e-26	sp|B7Z0K8|COLL1_DROME	Collagen alpha chain CG42342 OS=Drosophila melanogaster GN=CG42342 PE=2 SV=1	90.82	2e-33
211	CL1022.Contig2_17	GI19661 [Drosophila mojavensis]	61823.5638240001	0.060	2	2	CL1022.Contig1_17	1.12	1.010|1.234	0.025	1|2	0.989|0.684	1.61	1.253|1.970	0.257	2|2	0.634|0.117	1.35	1.248|1.450	0.020	2|2	0.895|0.418	0.85	0.869|0.832	0.001	1|2	0.846|0.812	1.47	1.498|1.449	0.001	2|2	0.256|0.500	1.19	1.294|1.082	0.022	2|2	0.553|0.912	CL1022.Contig2_17	MTAEVMATDTNWDPALSKLITSLKEAENLSNDQEIDFLKALLESKELNALVNVHTKVAKVGRDDRLAPVLSTSGQILYEVLEQLSQRCHLNEECKEAFHLLQEPHLQSLLYAHDAIAQKDFYPHLPEVPIEMDEDEETIKIVQLVKSNEPLGATIKTDEESGKIIIARIMHGGAADRSGLIHVGDEVIEVNGINVEGKTPGDVLSILQNSEGTITFKLVPSDGKGGQRESKVRVRAHFDYNPETDPYIPCKEAGLAFQRGDILHIVSQDDAYWWQARKESERTARAGLIPSRALQERRIIHERSQMETNDADSKKNDDFDREMIATYEEVAKLYPRPGVYRPVVLIGAPGVGRNELRRHLVARDPEKFRSPVPYTTRPIRTGEVAGREYIFVARDKMEA…	85.61	0.0	gi|195119688|ref|XP_002004361.1|	GI19661 [Drosophila mojavensis]	40.70	7e-123	sp|Q8BVD5|MPP7_MOUSE	MAGUK p55 subfamily member 7 OS=Mus musculus GN=Mpp7 PE=2 SV=2	85.61	0.0
212	CL673.Contig1_17	GK11342 [Drosophila willistoni]	38699.909232	0.030	1	3	-	0.74	0.800|0.670	0.008	3|3	0.319|0.124	0.9	1.019|0.777	0.029	3|3	0.977|0.394	0.85	0.750|0.941	0.018	3|3	0.220|0.831	0.88	0.702|1.055	0.062	3|3	0.052|0.893	1.03	1.106|0.958	0.011	3|3	0.699|0.932	1.2	1.231|1.164	0.002	3|3	0.363|0.530	CL673.Contig1_17	MDYIVKAYKDWKLHSQFHEIVPEMDDADYMMFNEKQSIRESARSLKKYGSTCCNHNLRNNETLIRHDVEKTDTLQGIALKYGCSTEQIRRANRLFASDSLFLRQFLLIPVDKTSPYYPKADENNPLEISSNNTVLQNNINSQNILNCVNATNASNTTADPLGVFAAPTSCIDSANNPRPSTLPTRPYSIAGELLVQNSDDDVTLNNHSSSSNKQSKSLDSVVAMTPEEENRKCINEFLSKIDSTISESRKYVEKSKEMITSQSDNDLFVTTDFVQHRRNNHLNNSYKTNRQNQSNHQRHSSSGSTSDTAQLLNTTQTRHVQKSLKRLEKQQDEFFEL	62.43	7e-90	gi|195399652|ref|XP_002058433.1|	GJ14410 [Drosophila virilis]	47.13	5e-11	sp|Q3KPL3|LYSM2_XENLA	LysM and putative peptidoglycan-binding domain-containing protein 2 OS=Xenopus laevis GN=lysmd2 PE=2 SV=2	62.43	3e-89
213	Unigene15150_17	GH12764 [Drosophila grimshawi]	14084.858801	0.235	2	11	-	1.22	1.248|1.189	0.002	11|10	0.013|0.005	1.16	1.125|1.187	0.002	8|11	0.145|0.029	1.38	1.650|1.107	0.147	11|11	0.001|0.567	0.91	1.042|0.776	0.035	10|11	0.829|0.001	1.34	1.199|1.472	0.037	9|11	0.017|0.000	0.95	0.959|0.946	0.000	11|11	0.773|0.583	Unigene15150_17	MGNAYARAIKPDVTPDHDCVPSFDPMLGFESRKERVMIATVEEMESAKISLEDRDYCAHKLLKYRACRADTFPFVYKCHHEKHDYLTCEYEDYVLRMKEFERERRLLERQKKIDK	79.79	2e-38	gi|195043531|ref|XP_001991638.1|	GH12764 [Drosophila grimshawi]	52.44	9e-20	sp|Q9CR61|NDUB7_MOUSE	NADH dehydrogenase [ubiquinone] 1 beta subcomplex subunit 7 OS=Mus musculus GN=Ndufb7 PE=1 SV=3	79.79	7e-38
214	Unigene32040_17	GG19388 [Drosophila erecta]	117093.602373999	0.009	1	1	-	0.78	0.636|0.922	0.041	1|1	0.469|0.921	0.93	0.911|0.946	0.001	1|1	0.902|0.953	0.63	0.549|0.716	0.014	1|1	0.365|0.622	1.22	1.294|1.139	0.012	1|1	0.616|0.818	0.76	0.738|0.790	0.001	1|1	0.658|0.756	1.2	1.386|1.012	0.070	1|1	0.589|0.991	Unigene32040_17	KSVNIAKRTATSSLPSSVALSAISAATAVTGELARPTASSTSTTATTTAGVSATSLKLLYKFIIFAILICTAPSLVSGRRYAPLMVEESEGTRRNNRPVVSECQFGKTVKEIGSTWFADLGPPFGVMYCIRCECVAVPKKRRIVVRVQCKNIKHECPPTNCSDPVQLPGKCCKTCPGDKNDTDVSLDVPAPVNIEEEERNMKHFAALLTGRTSHFLKGEEMKAMYVTSTYNLQNIVATGRFLFHKKNLYYSFYTSSKNNRPRTIQFVNDAGTILEEHQLQAPLSDMHSVYQNATGKICGVWRRVPRDYKRLLRDERLHVVLLWGRKDQIDLALGGKIGLYTALQKEMFSSLLEPAPGTKSTLMNGAGGTAIVSTTSGAAASVHLTLVFNGVFNSDEYLD…	70.07	0.0	gi|194894443|ref|XP_001978067.1|	GG19388 [Drosophila erecta]	69.79	0.0	sp|Q24025|SOG_DROME	Dorsal-ventral patterning protein Sog OS=Drosophila melanogaster GN=sog PE=1 SV=1	70.07	0.0
215	Unigene4821_17	GG19669 [Drosophila erecta]	17804.685782	0.153	1	2	-	0.88	0.909|0.852	0.002	2|2	0.873|0.737	1.64	1.403|1.875	0.111	2|2	0.375|0.129	0.63	0.689|0.563	0.008	2|2	0.401|0.111	1.49	1.660|1.323	0.057	2|2	0.114|0.299	1.12	1.074|1.157	0.003	2|2	0.912|0.810	1.71	1.428|1.990	0.158	2|2	0.331|0.085	Unigene4821_17	WNAIQKIHNRGLKIDAAKIIAVDMVNRVTVHLEKIRIAEARAAETGNPLVFSTNSYLADDDTELKFLRRLSEIMIILLLPRGYSLPPLKVLLSEILSYKIFFPLIKMLTSPDYINQKIVQNIETRLAAAAISKRSYEYAASFEDFLKIINNAGNLEE	87.90	8e-70	gi|194897073|ref|XP_001978585.1|	GG19669 [Drosophila erecta]	32.48	5e-20	sp|Q3ZT31|SNX25_MOUSE	Sorting nexin-25 OS=Mus musculus GN=Snx25 PE=2 SV=3	87.90	3e-69
216	Unigene526_17	163 723 minus strand TPA: TPA_inf: troponin I isoform a1 [Drosophila pseudoobscura]	22304.260559	0.353	4	82	CL1844.Contig2_17	1.86	1.893|1.825	0.002	80|79	0.001|0.001	1.21	1.302|1.118	0.017	70|71	0.001|0.024	2.04	2.081|2.000	0.003	76|77	0.001|0.001	0.88	0.864|0.905	0.001	70|78	0.001|0.001	1.48	1.497|1.470	0.000	80|72	0.000|0.000	0.67	0.672|0.662	0.000	67|75	0.001|0.001	Unigene526_17	MADEEAKKAKQAEIERKRAEVRKRMEEASKAKKAKKGFMTPERKKKLRLLLRKKAAEELKKEQERKAAERRRIIEERCGSPRNLSDASEETLKTLIKQHYDRINKLEDQKYDLEYVVKRKDVEINDLNAQVNDLRGKFVKPALKKVSKYENKFAKLQKKAAEFNFRNQLKVVKKKEFTLEEEEKEKK	99.32	2e-50	gi|38639854|tpg|DAA01989.1|	TPA_inf: troponin I isoform a1 [Drosophila pseudoobscura]	86.49	9e-40	sp|P36188|TNNI_DROME	Troponin I OS=Drosophila melanogaster GN=wupA PE=2 SV=3	99.32	6e-50
217	CL859.Contig3_17	GJ19148 [Drosophila virilis]	68866.6856930001	0.016	1	6	-	0.96	1.033|0.892	0.010	6|5	0.813|0.374	1.03	0.969|1.087	0.007	6|6	0.898|0.587	1.08	1.189|0.976	0.023	5|6	0.165|0.857	0.9	0.859|0.946	0.004	6|6	0.332|0.642	1.13	1.241|1.015	0.026	6|6	0.032|0.955	1.11	0.938|1.283	0.060	6|6	0.725|0.027	CL859.Contig3_17	FYISENITPMRLQYACRQLGIPLDAIRLIPANSTFGTMDLSLLLKQVQVDLNANRTPLMVVADVGASLSGYVDNLQRMSDICRTHNIWLHATGHALAALACAQGPNTISDIVDSIILNLGSWLGVPSLPIVLLHRQLQNSALAAFESDPILSRRLHSLSLWTSLQALGRDAIAERIHVAFQTCSILFEITSKCEGMRVVSRAPGGQSGTTLNDVINKPLDANLLFETVAPVVVFQFDGSTSIVTVDKTDNEHLNSLESRGKSLEKVDNATYFDRLNSWLGQLMQRDCPMFDFEIIEHPTQGTCVRYCPLELGLCQQPPTSENLEGFAHYLEGNVDILRATIKHKATFMEWVEKSDVLRIVDLPEWAGMGGVRFVPEGWESILTDQAKTELNKLNADLVE…	76.54	0.0	gi|195131795|ref|XP_002010331.1|	GI14740 [Drosophila mojavensis]	31.63	2e-63	sp|Q66HY8|PDXD1_DANRE	Pyridoxal-dependent decarboxylase domain-containing protein 1 OS=Danio rerio GN=pdxdc1 PE=2 SV=1	76.54	0.0
218	Unigene14436_17	GH23829 [Drosophila grimshawi]	65098.673977	0.055	2	4	-	1.16	1.316|1.003	0.049	4|3	0.335|0.995	0.95	0.996|0.904	0.004	4|4	0.993|0.700	1.44	1.518|1.359	0.013	4|4	0.072|0.137	0.91	0.940|0.871	0.002	3|4	0.835|0.435	1.09	1.058|1.131	0.003	4|4	0.793|0.585	0.77	0.777|0.770	0.000	4|4	0.332|0.119	Unigene14436_17	MNVEKLRRLQSQVRIGGKGTARRKKKVMHQTATTDDKKLQSSLKKLSVSTIPGIEEVNIIKDDLTVIHFNNPKAQASLSANTFAVTGHGETKKIVEMLPEILPQLGQETVVQLRMFANSMTGAQKTAGTIGGSDATASTNMLYSVVEEDDVPMLVSDFDAVAKMEAMKLREARITTNDKPAIERIETKGESAAVLPPLLEVESDEKGNNVQQLENRNLIVKSSEESEFQNETEFCIGKQGINTEKEKLNKTGKQNVKTTKDVGKAKETQKKIDNKSHQNQEPSRQMSRSEGKTQKPSKDKKPEDIALKAMPLKTERNREVGEYNKSEFVNDAAVIASEKLEQVTGRSTNLKDNKDHKQTKQIQQKQQKKSVKQEPPATPETKGKKQEPFVDKQEKNTKQ…	75.27	2e-65	gi|194758591|ref|XP_001961545.1|	GF14881 [Drosophila ananassae]	75.21	7e-38	sp|Q6PC91|BT3L4_DANRE	Transcription factor BTF3 homolog 4 OS=Danio rerio GN=btf3l4 PE=2 SV=1	75.27	7e-65
219	CL624.Contig1_17	AGAP002909-PB [Anopheles gambiae str. PEST]	23284.372745	0.152	3	54	-	0.79	0.737|0.849	0.006	54|51	0.001|0.001	0.96	0.945|0.968	0.000	54|50	0.001|0.184	0.65	0.633|0.658	0.000	54|50	0.001|0.001	1.22	1.268|1.172	0.005	50|51	0.001|0.001	0.8	0.782|0.815	0.001	54|54	0.000|0.000	1.18	1.238|1.115	0.008	54|52	0.001|0.001	CL624.Contig1_17	NQEDPCKVKGRVVGDEVYCDRYWECVSNQPELYDCPNGLVFAGKHRGVTEGCDYPWRANYCEGKQLANGPLSTEHCDWLYGIFGHETSCTRYWTCWNGTATEQLCIGGLLYNENAHSCDWPENVDGCQKHPLCNDDANGNVPLGKSCNRYWQCQGGYPRLQRCPAMLVFDRHSLRCVVPPTEECDIPTTPAPLDGEGE	90.91	3e-105	gi|312371308|gb|EFR19532.1|	hypothetical protein AND_22274 [Anopheles darlingi]	23.78	6e-06	sp|A8XWX5|CPG2_CAEBR	Chondroitin proteoglycan 2 OS=Caenorhabditis briggsae GN=cpg-2 PE=3 SV=2	90.91	9e-105
220	Unigene7405_17	GJ20761 [Drosophila virilis]	71495.361859	0.025	1	1	-	1.86	1.748|1.970	0.025	1|1	0.371|0.234	1.15	1.162|1.146	0.000	1|1	0.830|0.894	2.07	2.043|2.091	0.001	1|1	0.280|0.228	0.92	0.974|0.872	0.005	1|1	0.975|0.807	1.24	1.156|1.326	0.014	1|1	0.868|0.689	0.63	0.720|0.547	0.015	1|1	0.587|0.321	Unigene7405_17	MQISCKCLNFIATSNSQAANSNVGIVGIVGASISNGPSTTDSHSTRNNADDDNSMPLAQQSIGNCNNAGNANINSNNLCTTLMHAFLQRYPRTFIFYSQCMEFFKQAIGPITDLNIHTLSQRDLVYSITLEVPTGQEHPLTQAWQLSICINCNTALCAKRLPTSTPAATANGSPAPLTINPPQFLINCSLLTNNEELALRRADKSFSDTFGLLIMDHPQLQLEQANGGPLNNFSVGSLSTTSFQLDMKQQRLRQLQQNLQQRLKREIAETDERIQRYTEQQFALLKSFREKSEQEYALLGRLIQRVPEQQAIDFLDRALPALEVVGGGNYVSRRRNTITSRRDMMSVTTPTTPTTPNPASGLHMLSLPLNTTTATTTASAMDTTIAQVVGGTTAHTPTT…	44.02	8e-85	gi|195381339|ref|XP_002049410.1|	GJ20761 [Drosophila virilis]	-	-	-	-	44.02	3e-84
221	Unigene3384_17	1 294 LEN=294_ minus strand_ translated	11874.036108	0.111	1	1	-	2.18	2.634|1.717	0.420	1|1	0.154|0.340	2.13	1.890|2.376	0.118	1|1	0.274|0.252	1.06	1.123|1.004	0.007	1|1	0.910|0.995	2.34	2.413|2.263	0.011	1|1	0.150|0.077	1.07	0.985|1.151	0.014	1|1	0.988|0.873	1.05	1.078|1.013	0.002	1|1	0.919|0.992	Unigene3384_17	XNELYDMVAGRTGRLKEVIEHLNELINWDPKTTTQRSRFKRLKRAQELVWDIRPQSSISKDPEMYYRITLKPSLFSFPPELDYYPPTKYPNQFKNQRGX	-	-	-	-	-	-	-	-	-	-
222	CL143.Contig4_17	GH10288 [Drosophila grimshawi]	106595.169392	0.012	1	5	-	2.17	2.440|1.909	0.141	5|5	0.001|0.001	1.77	1.771|1.764	0.000	4|5	0.002|0.002	2.37	2.451|2.284	0.014	4|4	0.001|0.001	0.93	0.812|1.042	0.026	5|4	0.090|0.799	2.05	2.039|2.054	0.000	5|5	0.000|0.001	0.87	0.867|0.863	0.000	4|5	0.452|0.268	CL143.Contig4_17	SENVASSGGGKSAATMQSAAPMATAMGSAAAYTSELDLYRASGLRKKSSFIWNSFRMPRSKKDQNRGIGTATSKNVKHTDAPRELHEINHNNNNSITTTLSHGTTTRTNSQTPSPILGHHGKKTATAAASAVSGVTLSGTVLEKKTQSKFLPTRGKSLLQKSHQQQRSAEDTPVSAAEASERLDATELQRLKYLNRHSCNGRLDYEAIERHLEQTELQEERRNKSIEVLGVLLQYAVHDLDAFASPRMKAEKEKMQNYLCSTLKLLDEAKSNCSHLQDQLCDKEGYYSQREEDLQALHRCEIEKAQTNLSDYQAFAQEKFAAFESQLETQAAEHKRTLDSYRLEIDNKLSQRQQQLDEAEQRELKLKECFNLLTISEKELREKLTSTENAYAARLQAAA…	38.95	5e-103	gi|116007266|ref|NP_001036329.1|	toucan, isoform E [Drosophila melanogaster]	-	-	-	-	38.95	2e-102
223	Unigene30633_17	GK25034 [Drosophila willistoni]	57093.4247090001	0.133	5	7	-	1.08	1.075|1.093	0.000	6|7	0.534|0.355	0.95	1.021|0.884	0.009	7|7	0.926|0.433	1.08	1.007|1.154	0.011	7|7	0.967|0.078	0.99	0.951|1.034	0.003	7|7	0.688|0.721	0.96	0.938|0.986	0.001	7|7	0.602|0.954	0.88	0.970|0.799	0.015	7|7	0.874|0.044	Unigene30633_17	MPANKPYERPKDFVDPGLPSKCTWHLRTKEKTPHTKRPIAHRQKLTPDILEVIGCTPLVKLNRIPQAEGIKCEMYAKCEFLNPGGSVKDRIGYRMVQDAEEKGLLKPGCTIIEPTSGNTGIGIAMASAVKGYNCIIVMPEKMSNEKVAALRALGAKIIRTPTEAPYDSPEGLICVAQRLEKELPNAIVLDQYRNSGNPLAHYDGTAAEILWQTDNKVDMVVVCAGTCGTVTGIGRKIKEELPSCKIIAVDPYGSALARPDALNKTDVNFYEVEGIGYDFTPTVNDYNVIDSWTKVNDKESFATAKRLNVEEALLCGGSSGAAMCAALRVAKDLDESQRCVVLLPDGIRNYMTKFVSDNWMEARDFKPVVNEHNHWWWDTPVSALNLKAPVVLKSDVNFA…	73.06	0.0	gi|195448397|ref|XP_002071639.1|	GK25034 [Drosophila willistoni]	48.34	1e-125	sp|P35520|CBS_HUMAN	Cystathionine beta-synthase OS=Homo sapiens GN=CBS PE=1 SV=2	72.46	0.0
224	Unigene15890_17	214 1137 minus strand 26S proteasome regulatory complex subunit RPN11 [Glossina morsitans morsitans]	34570.611453	0.110	3	11	-	0.92	0.933|0.901	0.001	11|10	0.740|0.173	0.98	0.945|1.006	0.002	10|11	0.611|0.987	1.03	1.023|1.044	0.000	9|10	0.891|0.567	0.86	0.830|0.896	0.002	10|11	0.001|0.270	1.1	1.175|1.024	0.011	11|10	0.267|0.934	1.04	1.051|1.038	0.000	11|11	0.884|0.896	Unigene15890_17	MDRLLRLGGAMPQAPPPTDAPVVDTAEQVYISSLALLKMLKHGRAGVPMEVMGLMLGEFVDDYTVQVIDVFAMPQTGTGVSVEAVDPVFQAKMLDMLKQTGRPEMVVGWYHSHPGFGCWLSGVDINTQQSFEALSERAVAVVVDPIQSVKGKVVIDAFRLINPNMLVLGQEPRQTTSNLGHLQKPSVQALIHGLNRHYYSISINYRKNELEQKMLLNLHKKSWKDGLTLADYNEHCSINESTVQEMLELAKNYNKSLEDEEKMTPEQLAIKNVGKQDPKRHLEEKVDKVMQNNIVQCLGAMLDSIVFK	98.38	2e-179	gi|194761558|ref|XP_001962996.1|	GF14156 [Drosophila ananassae]	98.05	8e-180	sp|Q9V3H2|PSDE_DROME	26S proteasome non-ATPase regulatory subunit 14 OS=Drosophila melanogaster GN=Rpn11 PE=1 SV=1	99.03	5e-180
225	Unigene15178_17	52 504 minus strand ribosomal protein S14b [Glossina morsitans morsitans]	16274.619987	0.305	3	5	-	1.75	1.693|1.813	0.007	5|4	0.050|0.006	1.17	1.218|1.125	0.004	5|5	0.288|0.875	1.6	1.572|1.622	0.001	5|5	0.004|0.002	0.99	0.919|1.067	0.011	5|5	0.892|0.770	1.21	1.217|1.206	0.000	5|4	0.087|0.308	0.71	0.729|0.687	0.001	5|4	0.017|0.026	Unigene15178_17	MAPRKAKAQKEEVQVSLGPQVRDGEYVFGVAHIYASFNDTFVHVTDLSGRETIARVTGGMKVKADRDEASPYAAMLAAQDVAEKCKTLGITALHIKLRATGGNKTKTPGPGAQSALRALARSSMKIGRIEDVTPIPSDSTRRKGGRRGRRL	99.29	8e-61	gi|4588920|gb|AAD26263.1|	ribosomal protein S14 [Stomoxys calcitrans]	97.86	6e-60	sp|P14130|RS14_DROME	40S ribosomal protein S14 OS=Drosophila melanogaster GN=RpS14a PE=1 SV=1	100.00	2e-60
226	Unigene15164_17	GD13128 [Drosophila simulans]	36249.792981	0.181	5	6	-	1.65	1.778|1.514	0.035	5|4	0.001|0.021	1.38	1.216|1.542	0.053	6|5	0.636|0.008	1.77	1.883|1.659	0.025	6|6	0.109|0.150	0.81	0.799|0.818	0.000	5|6	0.200|0.150	1.44	1.410|1.474	0.002	6|6	0.221|0.304	0.83	0.823|0.837	0.000	6|6	0.436|0.529	Unigene15164_17	MACVAENLMSKVAEVLPFSGRKVSIIGIGQVGMACAFSILAQNISNEICLVDVCKDKLQGEMLDLLHGSNFLRNPKITASTEYEATAGSRLCIVTAGVRQKDGESRLSLVQRNTDILKHIIPQLVKYSPDTILLMVSNPVDIMTYVAWKLSGLPKNRVIGSGTNLDSSRFRFLMSQRLNVAPTSCHGWIIGEHGDSSVAVWSGVNIAGVRLRELNPNIGTTEDPENWEEVHQKVIDSAYEVIKLKGYTSWAIGLSSAALAAAILNNTSNIVAVSTSVLGQHGIDKDVFLSLPCVLNANGITSIVKQILTATEVEQLQKSANIMDQVQAGIKF	82.53	3e-155	gi|195492272|ref|XP_002093920.1|	GE20486 [Drosophila yakuba]	82.83	7e-156	sp|Q95028|LDH_DROME	L-lactate dehydrogenase OS=Drosophila melanogaster GN=ImpL3 PE=2 SV=1	82.53	9e-155
227	Unigene15474_17	202 462 minus strand ubiquitin-related modifier protein [Helicoverpa armigera]	9931.891745	0.138	1	11	-	0.86	0.999|0.711	0.041	11|11	0.991|0.001	0.78	0.807|0.747	0.002	11|11	0.001|0.001	0.91	1.013|0.814	0.020	11|11	0.932|0.001	0.95	0.871|1.019	0.011	11|10	0.013|0.866	0.85	0.887|0.811	0.003	10|9	0.017|0.009	0.92	0.798|1.049	0.032	11|11	0.001|0.591	Unigene15474_17	MSDEKKGETEHINLKVLGQDNAVVQFKIKKHTPLRKLMNAYCDRAGLSMQVVRFRFDGQPINENDTPTSLEMEEGDTIEVYQQQTGG	97.70	6e-45	gi|294714040|gb|ADF30256.1|	ubiquitin-related modifier protein [Helicoverpa armigera]	71.74	2e-32	sp|Q6DK72|SUMO3_XENTR	Small ubiquitin-related modifier 3 OS=Xenopus tropicalis GN=sumo3 PE=3 SV=1	97.70	3e-44
228	Unigene15582_17	GJ12488 [Drosophila virilis]	10282.542555	0.091	1	2	-	0.82	0.765|0.876	0.006	2|2	0.517|0.798	0.85	0.867|0.832	0.001	2|2	0.791|0.738	1.13	1.052|1.200	0.011	2|2	0.939|0.701	0.72	0.729|0.719	0.000	2|2	0.291|0.192	1.16	1.143|1.183	0.001	2|2	0.802|0.769	1.02	1.102|0.940	0.013	2|2	0.870|0.916	Unigene15582_17	MKFLACFLVLAVFLFLEQTQAQCPNAPQYYSCSGGYHSGRRGSNCYGGTRWYYNAGTRSCSSFYYNGCGGNANRYCSLGACQQRCTSR	42.47	4e-08	gi|195152644|ref|XP_002017246.1|	GL22203 [Drosophila persimilis]	47.22	5e-07	sp|P12111|CO6A3_HUMAN	Collagen alpha-3(VI) chain OS=Homo sapiens GN=COL6A3 PE=1 SV=5	42.47	2e-07
229	Unigene32194_17	GF15826 [Drosophila ananassae]	9776.077947	0.112	1	10	-	0.78	0.780|0.775	0.000	7|10	0.010|0.001	0.89	0.860|0.913	0.001	10|10	0.014|0.286	0.79	0.773|0.803	0.000	10|10	0.004|0.039	0.97	0.970|0.977	0.000	10|10	0.812|0.745	0.89	0.934|0.851	0.003	8|6	0.312|0.175	1.13	1.091|1.177	0.004	10|10	0.185|0.068	Unigene32194_17	VFSALLALTLAHPQREGAAYTNEAIRQAQQTFLIPKDAQIQNVQEGIELGAYEAIPGNQRINLFEILGDQVPSEVINNLQSQVDQIGRN	88.76	4e-37	gi|194762093|ref|XP_001963193.1|	GF15826 [Drosophila ananassae]	-	-	-	-	88.76	2e-36
230	Unigene14865_17	cathepsin L precursor [Sarcophaga peregrina]	33205.985263	0.338	6	50	-	1.02	1.000|1.037	0.001	50|48	1.000|0.642	0.96	0.930|0.982	0.001	43|45	0.030|0.815	0.94	0.927|0.956	0.000	48|49	0.166|0.544	1.1	1.132|1.060	0.003	47|48	0.001|0.044	0.88	0.889|0.878	0.000	45|44	0.001|0.001	1.02	1.017|1.023	0.000	48|47	0.894|0.763	Unigene14865_17	EERFRLKIFNENKLRIAKHNQLFAMGKVSFKMAVNKYSDMLHSEFRETMNGFNNTLRKQLRSNRKFTGATFIPPAHVTVPKSVDWRSHGAVTDVKDQGHCGSCWAFSTTGALEGQHFRKSNALVSLSEQNLVDCSSKYGNNGCNGGLMDNAFRYIKDNGGIDTEKSYPYEGIDDSCHYNPSTIGATDRGFVDIPAGDEEKMKQAVATIGPVSVAIDASHESFQFYSEGIYDEPLCDAEQLDHGVLVVGYGTDPSGQDYWLVKNSWGTTWGDKGYIKMARNKKNQCGIASASSYPIV	82.09	4e-150	gi|22653679|sp|Q26636.1|CATL_SARPE	RecName: Full=Cathepsin L; Contains: RecName: Full=Cathepsin L heavy chain; Contains: RecName: Full=Cathepsin L light chain; Flags: Precursor	82.09	4e-151	sp|Q26636|CATL_SARPE	Cathepsin L OS=Sarcophaga peregrina PE=1 SV=1	82.83	8e-149
231	Unigene14560_17	GK18269 [Drosophila willistoni]	13527.041281	0.214	2	5	-	0.83	0.793|0.868	0.003	5|5	0.086|0.462	0.86	0.844|0.875	0.000	5|5	0.239|0.597	1.01	1.046|0.974	0.003	4|5	0.848|0.877	0.85	0.887|0.814	0.003	5|5	0.633|0.060	1	0.989|1.006	0.000	5|3	0.961|0.992	1.03	1.034|1.028	0.000	5|4	0.924|0.917	Unigene14560_17	NMSNVIDPIKLLTDKGERQPSFMNNIYNPLICSVLGFGCAVFLNFGLRKPPFSGIQNHFILSTLGGGLGLYFDQRRNEYLAKRDAVLRHYIELHPDDFPVKERKKYADVLEAWVPIR	70.09	2e-45	gi|195436931|ref|XP_002066399.1|	GK18269 [Drosophila willistoni]	31.86	9e-09	sp|Q9CQ54|NDUC2_MOUSE	NADH dehydrogenase [ubiquinone] 1 subunit C2 OS=Mus musculus GN=Ndufc2 PE=1 SV=1	70.09	7e-45
232	Unigene6434_17	GH23649 [Drosophila grimshawi]	85448.2930759998	0.159	9	21	-	1.82	1.841|1.793	0.001	20|21	0.001|0.001	1.74	1.666|1.809	0.010	20|21	0.001|0.001	2.02	2.170|1.879	0.042	21|19	0.001|0.001	0.89	0.878|0.907	0.000	17|20	0.002|0.112	1.87	1.919|1.830	0.004	20|21	0.000|0.000	0.91	0.869|0.958	0.004	21|21	0.017|0.507	Unigene6434_17	VAFSCCNAVAEKEVDEKETNSLLWKAQKFLLEIVWHVQEPATLTECQGVEFVNDETQYKVKFDSDMQRFVNDVQQRRLLPRNDFFSALVHTHHQQALGLYKLFTYAKDWTLFKRNVCWARTHINPGMFVYALDLTIRHRKDCEIFVLPPIYEIFPQHFFNSQVINRAMTFSERKVEMSQEHAYAINGTVSEYSLHDWQPWQWWKPMGLSDERWYRDTRSSVAQRDGVTKYWTPVDYTRDVHILNAETRLSYLLEDVDWNAIWYELNLDYPPFLAQEEIAAHHHRRTAEWWIHQIRTLMTRYNLERLSQRMNPIEDMTLSQTIATGYNPQLVSWNGQTFWQRYNNYEYADYGFPPTIDLVFKLTNEIYKLADSGAYWLENGTLHDLHQLEAQQDFFNILH…	36.36	3e-135	gi|195054701|ref|XP_001994262.1|	GH23649 [Drosophila grimshawi]	36.13	5e-130	sp|P11997|LSP1G_DROME	Larval serum protein 1 gamma chain OS=Drosophila melanogaster GN=Lsp1gamma PE=2 SV=2	36.36	1e-134
233	CL2178.Contig1_17	GH13554 [Drosophila grimshawi]	28697.209393	0.100	2	6	-	0.76	0.762|0.767	0.000	6|4	0.024|0.106	0.78	0.834|0.728	0.006	5|5	0.176|0.036	0.73	0.727|0.739	0.000	6|6	0.011|0.110	1.01	0.989|1.034	0.001	6|6	0.944|0.731	0.75	0.725|0.776	0.001	6|6	0.005|0.032	1	1.035|0.966	0.002	6|4	0.881|0.892	CL2178.Contig1_17	MNQVGRIGVLGGGKMALAMVKGFLSAGLTKSERIIASVHPDDKQSFIQFEQIGIQTVVKNEPVVEKSDIVFISVKPQVVPVILPEIRSLSNNKLFISIAMGITLKMLEEQLSSSARIIRAMPNTPALVKAGCSVYARGTKASKSDGELTKSLLEAIGTSEEVPEIWFDAITALSGSGPAYVFVMIEALADGGVRMGLPRDLAYRLAAQTVLGSGQLVRDSREHPGVLKDNVTSPAGSTAAALKVLESEGFRGAVANAVEAAALRCREISGN	67.90	5e-101	gi|195055993|ref|XP_001994897.1|	GH13554 [Drosophila grimshawi]	45.49	2e-60	sp|Q5R9X6|P5CR1_PONAB	Pyrroline-5-carboxylate reductase 1, mitochondrial OS=Pongo abelii GN=PYCR1 PE=2 SV=1	67.90	2e-100
234	Unigene15862_17	GI12320 [Drosophila mojavensis]	162079.030349999	0.033	4	5	-	1.22	1.196|1.234	0.001	5|5	0.633|0.260	1.12	1.183|1.062	0.007	5|5	0.650|0.897	1.38	1.323|1.433	0.006	5|3	0.095|0.097	0.91	0.917|0.903	0.000	4|5	0.607|0.712	1.27	1.234|1.305	0.003	5|5	0.220|0.062	0.88	0.988|0.767	0.024	5|4	0.965|0.104	Unigene15862_17	LAILQIACVCWTANANGHYTVVAPGTIHTNGKYNVAVALHQASEPATVRISLLGPQYNDSKTIELQPYEVKNISFTVPILRDGNYNITAEGLSGLIFKNSTKLNHNVFQTHVKIQTDKGKYKPGDAVNFRVLFMDENLKPSGPSASSVIWFEDGKRNRIKEYKNFTVTKGVYTGNFQISEFPVHGRWRLTVDNGGWRRTIVNFDVQKYVLPKYKVSVDATSKVSVKDGDMQVVVRANYTYGKPVNGKVTLIMKLQSFYYSHKNNNITTDQPPQIIKTKDMVNGKAKFDLNVSQYKDSFLSYRTAPLDITATVEENFTGVKINGTTGATLYRDRYFISCQVFKNCNWFIADEEVEMIFLVVSFDGAMLRDINSPVRLRFTESLNKNYYKDDNESEPKIEN…	52.16	0.0	gi|195115946|ref|XP_002002517.1|	GI12320 [Drosophila mojavensis]	29.38	7e-133	sp|Q6YHK3|CD109_HUMAN	CD109 antigen OS=Homo sapiens GN=CD109 PE=1 SV=2	52.16	0.0
235	CL36.Contig1_17	RE08710p [Drosophila melanogaster]	26747.525584	0.033	1	3	CL1366.Contig1_17	0.61	0.574|0.639	0.002	3|3	0.106|0.147	0.81	0.877|0.742	0.009	3|3	0.680|0.291	0.75	0.713|0.786	0.003	3|3	0.179|0.496	0.8	0.776|0.828	0.001	3|3	0.229|0.230	1	0.963|1.035	0.003	3|3	0.916|0.940	1.27	1.296|1.248	0.001	3|3	0.226|0.515	CL36.Contig1_17	LSKMRTGCVLVFAAVLGVVYCYPEGRVVNGTSSDIAKFPFLVSLRGSTGSHSCGSSIIAPRWILSAAHCVDGASPSKISIQFASTEIDAQSTNVAKVKRIIIHEDYRPEDSYANDIALLELFGQLVYNYKTIAPVTLPEPYFEIPQVQAGAPGVLAGWGRNATGGPVQKVVQEVNLKIFSDEECIKRHEGRTTKDHICGGVDEGGKGQCNGDSGGPLLYNGSIQLGIVSWSVKPCAVYPYPGVYTK	56.67	3e-75	gi|195444342|ref|XP_002069823.1|	GK11729 [Drosophila willistoni]	33.93	7e-31	sp|P35039|TRY5_ANOGA	Trypsin-5 OS=Anopheles gambiae GN=TRYP5 PE=2 SV=2	56.67	9e-75
236	Unigene15373_17	GD21912 [Drosophila simulans]	46459.452385	0.096	3	4	-	1.13	0.996|1.264	0.036	3|4	0.989|0.495	1.27	1.128|1.410	0.040	4|4	0.585|0.068	1.07	1.086|1.048	0.001	4|4	0.863|0.928	1.14	1.216|1.068	0.011	4|4	0.582|0.688	1.05	1.147|0.948	0.020	4|3	0.491|0.908	1.1	1.104|1.091	0.000	3|4	0.786|0.879	Unigene15373_17	LATIPLPASALYSPSDDVVELTPSNFERLVIDDDAVWVVEFFAPWCGHCKSLVPEYKKAAKALKGVVKVGSVNADEHRSIGGQYGVKGFPTIKIFGANKRSPISYSGQRTAKAIAEAALAEAKKKVQDVLGGGSSSSGGSSSGGGSDSVIELTDDNFDKLVLESDDVWLVEFFAPWCGHCQKLAPEWAKAAKELKGKVKLGALDATAHQSKASEYGIRGYPTIKFFPAGKKSSSDAAEYDGGRSASDIVSWALEKHVDSVPAPELLEIYDENSFDKACDGKPLCVVSVLPHILDCDAKCRNKFLDTLRELGEKYKQKLWGWVWAEGGAQSSLEESLEIGGFGYPAMAVVNFKKMKFSVLKGSFSKEGINEFLRDISYGRGHTAPVRGAKKPAIVTVQQW…	81.13	1e-174	gi|195579573|ref|XP_002079636.1|	GD21912 [Drosophila simulans]	60.29	3e-127	sp|Q63081|PDIA6_RAT	Protein disulfide-isomerase A6 OS=Rattus norvegicus GN=Pdia6 PE=1 SV=2	81.13	4e-174
237	Unigene15057_17	163 777 20S proteasome regulatory subunit beta type PSMB3/PUP3 [Aedes aegypti]	23566.702079	0.166	2	5	-	1.3	1.272|1.319	0.001	5|5	0.083|0.040	1.18	1.137|1.227	0.004	5|5	0.389|0.179	1.45	1.454|1.444	0.000	3|3	0.096|0.092	0.9	0.945|0.863	0.003	3|3	0.847|0.357	1.31	1.305|1.311	0.000	3|5	0.183|0.059	0.94	0.982|0.896	0.004	4|5	0.961|0.437	Unigene15057_17	MSIMAYNGGCLVAMRGKNCVAIATDHRFGIQAQTISTDFEKVFQVNPRTFLGLVGLQTDILTVHDRIMFRKKLYEDRENREMTPEPFSAMISNFLYEHRFGPYFIEPVIAGLHPKTLEPFICNMDLIGCPNKPDDFVVAGTCSEQLYGMCETLWKEDLEPAELSEVISQAIVSAFDRDAISGWGATVYIIEKDKITKKQIKTRMD	82.93	3e-102	gi|94468582|gb|ABF18140.1|	20S proteasome regulatory subunit beta type PSMB3/PUP3 [Aedes aegypti]	83.41	4e-103	sp|Q9XYN7|PSB3_DROME	Proteasome subunit beta type-3 OS=Drosophila melanogaster GN=Prosbeta3 PE=2 SV=1	82.93	9e-102
238	Unigene15636_17	GG15783 [Drosophila erecta]	50062.5129089998	0.251	7	45	-	1.09	1.069|1.113	0.001	45|44	0.492|0.170	0.95	0.942|0.965	0.000	45|41	0.301|0.772	1.05	0.998|1.100	0.005	42|43	0.991|0.110	1.03	0.994|1.056	0.002	44|45	0.944|0.062	0.95	0.981|0.909	0.003	41|44	0.874|0.009	0.92	0.900|0.934	0.001	44|45	0.173|0.604	Unigene15636_17	IVLLQFSEALPVSKNKKEEKEEAPVTPATPDVETALEYERYLKEVVEALESDPDFRKKLDKAPEADIRDGKIAQELEYVNHHVRSKLDEIKRREVERLRQLVNHEYELENEIDREHLKIPQHLDHQNEHTFEIEDLKKLIKKTSEDLAEADRKRRAEFKEYEMQKEFEKESKLKELPEEQRKKFEQEEKEKEEKHKKHEKVHHPGNKAQLEDVWEQQDQMDKKDFDPHTFFMMHDVDGNGYWDEIEVKALFIKELDKVYQSGLPEDDMRERAEEMERMREHVFEETDTNRDGLISFQEFLEQTNRDEWNKDPEWETVDEKPQYTHEEYLEFEKRRQEEIQRMIAQGLLPPHPNMPQGYYPNGAHDTYQVGGQQQQVPVGQQQMHYQQPQQQHQQQQQQY…	77.78	7e-136	gi|194871765|ref|XP_001972901.1|	GG15783 [Drosophila erecta]	47.48	1e-56	sp|Q9JI85|NUCB2_RAT	Nucleobindin-2 OS=Rattus norvegicus GN=Nucb2 PE=2 SV=1	79.44	2e-137
239	CL3253.Contig2_17	GL13094 [Drosophila persimilis]	44387.1834340001	0.143	4	20	CL3253.Contig1_17	0.93	0.865|1.001	0.009	19|17	0.001|0.993	0.93	0.932|0.930	0.000	19|18	0.041|0.179	1.17	1.176|1.162	0.000	20|20	0.001|0.005	0.77	0.814|0.733	0.003	19|20	0.001|0.001	1.16	1.138|1.183	0.001	20|16	0.006|0.000	0.99	1.037|0.934	0.005	17|18	0.385|0.021	CL3253.Contig2_17	MLRTLSRCSELPVVAKQLQKNAAQSGVQKSNKYATEATIQVQRPFKLHRLDKGPETCVTLTKEDATKYYTQMQTIRRIETAAGNLYKEKIIRGFCHLYSGQEACAVGMKAAMREQDNIISAYRVHGWTYLMGVSPVGVLAELTGRQGGCALGKGGSMHMYAPNFFGGNGIVGAQVPLGTGVALACQYKGNGGVCLSLYGDGAANQGQVFESYNMAALWKLPAIFVCENNNYAMGTSTTRGSSNTDYYTRGDVVPGIWVDGMDILAVRSATEFAIEYVNKVGPIVLETNTYRYSGHSMSDPGTSYRTREEIQEVRQKRDPITSFKELCIEQGLLSADEIKEIDTKVRKEIDEATQVAKNDKELPVTGLWTDVYSNNLEPKIRGITSYNIAHISQRKGVNH	83.71	0.0	gi|195163423|ref|XP_002022549.1|	GL13094 [Drosophila persimilis]	62.33	9e-136	sp|P52899|ODPA_CAEEL	Probable pyruvate dehydrogenase E1 component subunit alpha, mitochondrial OS=Caenorhabditis elegans GN=T05H10.6 PE=3 SV=1	83.71	0.0
240	Unigene14446_17	GK13707 [Drosophila willistoni]	247831.379642	0.271	43	208	-	1.9	1.987|1.805	0.017	205|203	0.001|0.001	1.37	1.340|1.404	0.002	206|200	0.001|0.001	2.22	2.283|2.154	0.008	205|206	0.001|0.001	0.86	0.849|0.869	0.000	198|202	0.001|0.001	1.57	1.603|1.531	0.003	206|207	0.000|0.000	0.73	0.712|0.743	0.000	208|208	0.001|0.001	Unigene14446_17	RPVNLSLLKAVLFCILVISAAKSAYICKRGCPRSDGETLKFQPGHIYEYSFDSILAVALGTGSSTAADDTNLKLIGTAKVFAEGNCGYTLQLSAVKVSTTKEAIEKKIVQSIQKPVHFTLVNGKVEPQLCSDPNDNQYALNIKRAVISLLQSNTEDGTEVDVFGQCATHTSVSNIAGSQVVTKVRNLNHCSYRENTRSSLIHGVVNQAAGVKSTHLFKASYVKESKILNGVVESVRLVEDYNFGVAENDVNSIRGKVITNLKIKNSAGVTSASPQTGNRGVSIIFQKPEVYVTKNLAALKTSLTQLVNSLDSYVKKDSAKDFTELIHLMRNADTDTLLELAAVPHPNTILARKVYLDALFRTATSESAKAIFKKFNKMDEKEKLIGIISLNIIQTVDKE…	53.14	0.0	gi|195450783|ref|XP_002072631.1|	GK13707 [Drosophila willistoni]	47.60	0.0	sp|Q9V496|APLP_DROME	Apolipophorins OS=Drosophila melanogaster GN=Rfabg PE=1 SV=2	53.14	0.0
241	Unigene27410_17	76 858 minus strand superoxide dismutase 1 [Musca domestica]	27984.060343	0.077	2	7	-	0.8	0.857|0.741	0.007	7|6	0.084|0.012	1.12	1.167|1.077	0.004	7|7	0.087|0.537	0.84	0.865|0.819	0.001	6|7	0.140|0.033	0.93	0.921|0.933	0.000	6|7	0.395|0.403	1.18	1.113|1.239	0.008	7|7	0.162|0.030	1.33	1.318|1.348	0.000	7|7	0.006|0.031	Unigene27410_17	MGDIKVEFAVQMRGDHCAERVRNALQGASKVQIDSAEGRVTIETKEPWYILKDKIESTGRKAVLVGFGGQSAVAIINTTGSDVDRTPIQGILRFCALTKDTPGVVVDGVVDGLTPGLHGLHVHESGDVSSGCASIGEHYNPRGSPHGSPENAPNARHEGDLGNIRADANGRATFRFVDPVLAVWDIIGRSVAIKANADDMGRGGNEQSRIDGNAGERIACGIIARSAGIMENFKKICACDGVTLWDERNKPIAGGDRAQKL	93.49	5e-130	gi|386306049|gb|AFJ05108.1|	superoxide dismutase [Bactrocera dorsalis]	44.87	4e-58	sp|Q6PWT7|CCS_PIG	Copper chaperone for superoxide dismutase OS=Sus scrofa GN=CCS PE=2 SV=1	73.95	4e-101
242	Unigene14260_17	183 1088 serine/threonine specific protein phosphatase PP1 [Glossina morsitans morsitans]	35241.427099	0.123	2	6	-	0.77	0.752|0.778	0.000	9|9	0.001|0.058	0.94	1.009|0.865	0.010	9|8	0.966|0.093	0.76	0.766|0.762	0.000	9|8	0.016|0.018	0.93	0.948|0.913	0.001	9|7	0.369|0.144	0.95	0.927|0.963	0.001	8|7	0.262|0.835	1.17	1.285|1.062	0.025	9|8	0.001|0.640	Unigene14260_17	MADVMNIDSIISRLLEVRGARPGKNVQLSESEIRGLCLKSREIFLSQPILLELEAPLKICGDIHGQYYDLLRLFEYGGFPPESNYLFLGDYVDRGKQSLETICLLLAYKIKYSENFFLLRGNHECASINRIYGFYDECKRRYTIKLWKTFTDCFNCLPVAAIVDEKIFCCHGGLSPDLSSMEQIRRIMRPTDVPDQGLLCDLLWSDPDKDTMGWGENDRGVSFTFGAEVVGKFLQKHDFDLICRAHQVVEDGYEFFAKRQLVTLFSAPNYCGEFDNAGAMMSVDDSLMCSFQILKPADKRKK	98.68	1e-175	gi|195110805|ref|XP_001999970.1|	GI22788 [Drosophila mojavensis]	97.67	1e-175	sp|P48461|PP11_DROME	Serine/threonine-protein phosphatase alpha-1 isoform OS=Drosophila melanogaster GN=Pp1alpha-96A PE=1 SV=1	98.34	2e-175
243	CL3713.Contig2_17	GJ11159 [Drosophila virilis]	126747.392405999	0.108	8	15	-	1.32	1.285|1.362	0.003	14|14	0.001|0.002	1.26	1.314|1.207	0.006	15|14	0.001|0.027	1.42	1.399|1.437	0.001	14|14	0.001|0.001	0.92	0.932|0.905	0.000	14|15	0.258|0.076	1.34	1.292|1.394	0.005	15|12	0.008|0.000	0.92	0.986|0.854	0.009	15|15	0.944|0.035	CL3713.Contig2_17	VLSDKEGKSKATVGQPTESFEEVASVDKYRDVKVVEDKCTVKRVDNEDSEAGVLADERSSSTWADIVSETIEQEKPVQEIEKFYKKKFRRDTNADALPEVLREHRPVHESVSSFIEQERQHTLLSESKPELKLQPKDIPEIKTAVTTMSWSDIVKQDSKDGAKREKAAVKKELSAPTKTEVDIGVTQVDVAEDSYSHRFEIITKCVEDKTTKEKTKKQKSRKAKAEELPKEPSTVEIHPNESTSIDLPWSVIVSQNVVEVPITNMDEISQIAEQRMRQIKSGESKVKQTPVVKNSQHKANKEQIHTFIEHEIHHTKVSPPKPVTEILESSTPTERVEDRLPAGEEVVEVSLSWSDMVNQEQEEEIVPHPVIESLSEPVARVNTLEETQSLHKAELTDEE…	36.88	6e-23	gi|195385900|ref|XP_002051642.1|	GJ11159 [Drosophila virilis]	-	-	-	-	36.88	2e-22
244	Unigene30469_17	GA22705 [Drosophila pseudoobscura pseudoobscura]	9947.36211800001	0.333	1	1	-	2.12	2.444|1.788	0.215	1|1	0.152|0.301	1.31	1.265|1.350	0.004	1|1	0.715|0.718	0.87	0.877|0.864	0.000	1|1	0.893|0.861	2.56	2.421|2.699	0.039	1|1	0.121|0.042	0.57	0.601|0.530	0.003	1|1	0.396|0.334	0.66	0.635|0.680	0.001	1|1	0.425|0.559	Unigene30469_17	SANKLCAVGLLIFCGLAVLNAAQPGYNTPKSCPPHETYTPCGPSCQTECATLNDPCYIRHIRCPDGCYCDEGYARDANGACIPQEQC	66.67	7e-26	gi|198471015|ref|XP_002133636.1|	GA22705 [Drosophila pseudoobscura pseudoobscura]	50.88	3e-06	sp|P82176|IMPI_GALME	Inducible metalloproteinase inhibitor protein OS=Galleria mellonella GN=IMPI PE=1 SV=2	66.67	3e-25
245	Unigene30104_17	GM15451 [Drosophila sechellia]	15814.188266	0.157	2	7	-	1.33	1.325|1.326	0.000	7|7	0.004|0.037	1.34	1.355|1.332	0.000	7|7	0.003|0.022	1.38	1.424|1.340	0.004	7|7	0.002|0.002	0.99	1.006|0.981	0.000	7|6	0.967|0.872	1.37	1.299|1.450	0.011	7|7	0.003|0.002	0.99	1.011|0.968	0.001	6|7	0.963|0.804	Unigene30104_17	QSTRTLISPLRMALKQVARYASTEAAPAPARVEKTVNNVTILGRVGADPQLRGSVEHPVVMFSVATHTNYRYESGDWAQRTDWHRVIVFKPNLRDTVMEYLKKGQRTMVQGKITYGEITDMQGNQKTTTSIIADDVIFFR	77.86	1e-59	gi|195036068|ref|XP_001989493.1|	GH18833 [Drosophila grimshawi]	80.14	6e-60	sp|P54622|SSBP_DROME	Single-stranded DNA-binding protein, mitochondrial OS=Drosophila melanogaster GN=mtSSB PE=1 SV=2	77.86	5e-59
246	Unigene31529_17	GD15725 [Drosophila simulans]	90968.6574210001	0.174	10	50	-	1.14	1.160|1.129	0.000	50|48	0.001|0.001	1.25	1.197|1.296	0.005	49|49	0.001|0.001	1.5	1.504|1.503	0.000	49|50	0.001|0.001	0.76	0.749|0.774	0.000	45|49	0.001|0.001	1.61	1.662|1.562	0.005	50|48	0.000|0.000	1.08	1.043|1.124	0.003	48|49	0.264|0.012	Unigene31529_17	SQDDDSYLGYSMITGDFNGDRVEDIAIGMPRGAGLLGKIVVNHWNMTNIFNFTGHQIGEYFGYALATCDVDGNGLDDLIIGAPMYSETGNVEGKYDVGRVYILLQMEGRERWPIEHIREGYNTKGRFGLALTTLGDINRDGYGDFAVGAPYDGPVGRGVVYIFHGSPNGPLLKPSQIIKSEDIVEGAPYPHTFGFSLSGGLDMDGNTYPDLAVGAYASDQVFIFKSRPVAAVNAMTSFVNQSKLISLDDRKCQTVRDGKRVPCTEMMTCWSYTGEYLPRNLDFDVSWVLDAKKPKKPRMFFLLDEGKNIRNLSISLQYGRTYCRNETVYLVDNVQDKLTPLEVEMRYDLRSRRPLAPVIRRKRDLLEPVIDQNREIILRDAINIQKNCGLDNICVPDLQ…	67.07	0.0	gi|195457268|ref|XP_002075500.1|	GK18412 [Drosophila willistoni]	66.58	0.0	sp|P12080|ITA2_DROME	Integrin alpha-PS2 OS=Drosophila melanogaster GN=if PE=1 SV=2	67.07	0.0
247	CL2783.Contig1_17	GI11328 [Drosophila mojavensis]	20935.245106	0.138	2	11	-	0.86	0.714|1.009	0.044	10|9	0.001|0.941	0.86	0.822|0.895	0.003	11|10	0.005|0.110	0.92	0.870|0.969	0.005	11|11	0.062|0.633	0.88	0.977|0.789	0.018	11|11	0.841|0.014	0.97	0.952|0.985	0.001	9|10	0.447|0.912	1.06	1.134|0.977	0.012	11|11	0.028|0.756	CL2783.Contig1_17	MEYLRPVWNCLKTFCGCIHCTEDIGNQYIYEPSERTYLLADPAIHNSPALRQINSENLSNDFAQSLPKKDENALCRLVQNTAMNMIDVGAMDLHNLENEEYNDRIKLYSHRLQQQWNSIQHPGKGISGFLSDIPNASDQLRMTNSPDDLLQISNFLSEGHAALLDLRIDHKEAIVVPFRIP	58.24	6e-56	gi|195129693|ref|XP_002009290.1|	GI11328 [Drosophila mojavensis]	33.33	9e-11	sp|Q5R766|LTOR1_PONAB	Ragulator complex protein LAMTOR1 OS=Pongo abelii GN=LAMTOR1 PE=2 SV=1	63.54	2e-60
248	CL1949.Contig1_17	GK17147 [Drosophila willistoni]	127183.964361999	0.615	20	254	-	1.05	1.128|0.962	0.014	252|246	0.001|0.384	0.99	1.033|0.944	0.004	236|240	0.366|0.089	0.93	0.932|0.922	0.000	244|244	0.035|0.001	1.11	1.009|1.216	0.021	240|247	0.839|0.001	0.9	0.940|0.867	0.003	241|229	0.015|0.000	1	0.957|1.042	0.004	236|252	0.037|0.231	CL1949.Contig1_17	MRTFVILLSCLVCFATAGHYGLAQNLLRLDNIRNGKQGYTPVGTSQRQRQEFLLDVLLQVQKPLVNNQLVQLGQELVTDPNMYLLPNDEILQQFLQQAENREIIGRNGVYNPVDISNIRQLVGLQRSFVLARDFSVFQRNVVYARLYFNALMFVDALSLAIRDRPDTQDLVIPPMNEILPQLYYDNYVLNNAQNVDYNSLISQEARANIKPSIFEILGLRKIGSLFQLGKYGLYNPLQQRHGAQRDGFGRFGISPKGSPVNSKENGREYLVDSSYIQEKIVVAVENGDGTDLTNDIDLNVAWNNIIIDQLVQTVTESIQGGQQNSVLGNDQQKYQKLQDEQTFGYGTSGGGYQAQSKQYIYEDQSGGIISNGLPQVDVGNPRLLFVGHRRRLDNGGYSA…	87.64	4e-99	gi|312285642|gb|ADQ64511.1|	hypothetical protein [Bactrocera oleae]	29.27	6e-33	sp|P28514|ARY2_CALVI	Arylphorin subunit C223 OS=Calliphora vicina PE=2 SV=1	87.64	2e-98
249	Unigene17096_17	GH13356 [Drosophila grimshawi]	74286.6166970001	0.031	1	1	-	2.36	1.208|3.511	2.652	1|1	0.801|0.057	3.33	4.843|1.821	4.566	1|1	0.067|0.393	1.64	0.909|2.365	1.060	1|1	0.926|0.163	1.45	1.584|1.323	0.034	1|1	0.368|0.527	2.49	1.144|3.845	3.648	1|1	0.884|0.096	2.18	3.879|0.475	5.794	1|1	0.095|0.219	Unigene17096_17	MSMEDRDIIVIDRADIRESTKNESNVIVVDKNMQQDVDLAELLGSNWPSNAGGAATILNNKQPTKQQHTTASVNIDSVQTKSVRNKSPNPLTHFGGIKTPGNVAMDGFIGGEPAGDIIGTNKYANARDSPVYDNLVDIDTPADVDLVKYTPLQDMPDTALGVGSMVEVSIPEASENLYGVIRWIGSAQGRKQIMVGVELEEDQDDRTLPTSNGTYKGVRYFKCHDGRALFVTSDRCCTDRRFIELDGKAAANIPTDSKMFGQVECPSVPGAVAPLKIKSLEELEENCGKFKGIQGHHNSCYLDATLFAMFTFTPVFDSLLFRPPEADDIPNYTEVQKVLREEIVNPLRKNVFVRADRVMKLRQLLDKLSSISGLTTEEKDPEEFLNSLLAQIMRVEPFL…	65.68	0.0	gi|195050739|ref|XP_001992957.1|	GH13356 [Drosophila grimshawi]	46.99	8e-126	sp|Q5RED8|CYLD_PONAB	Ubiquitin carboxyl-terminal hydrolase CYLD OS=Pongo abelii GN=CYLD PE=2 SV=1	65.68	0.0
250	Unigene15154_17	GK15464 [Drosophila willistoni]	11135.47246	0.417	2	2	-	1.02	0.985|1.064	0.003	2|2	0.977|0.912	1.39	1.459|1.327	0.009	2|2	0.299|0.738	0.82	0.755|0.882	0.008	2|2	0.531|0.811	1.26	1.227|1.297	0.002	2|2	0.596|0.338	1.12	1.081|1.152	0.003	2|2	0.922|0.818	1.33	1.435|1.218	0.024	2|2	0.322|0.681	Unigene15154_17	ELGRFVLLGILLLFVSAVAARTRGRPNICQQPPPRSEGVCTIEIEGFYFDPRTNDCEMYVLGGCHTVPGQSFGSRQDCLDTCVHLTRRLQDLRYNE	67.61	3e-23	gi|195148002|ref|XP_002014963.1|	GL19455 [Drosophila persimilis]	-	-	-	-	67.61	1e-22
251	CL2913.Contig2_17	GF14130 [Drosophila ananassae]	125918.743419999	0.012	1	2	CL2913.Contig1_17	0.94	0.849|1.028	0.016	2|2	0.737|0.965	1.08	1.094|1.072	0.000	2|2	0.872|0.920	0.85	0.789|0.916	0.008	2|2	0.617|0.876	1.1	1.137|1.067	0.002	2|2	0.772|0.872	0.99	0.948|1.022	0.003	2|2	0.940|0.979	1.14	1.246|1.026	0.024	2|2	0.638|0.971	CL2913.Contig2_17	LLFFTVLTNLFASSLQDCVWYGVCNVDPVMGHKQYCVYNGTAKVMPAKGLELMKARCSYLLEGGATEFCCNSDQISILNENIKLAANFLERCPSCMANFVRHLCEFTCSPKQSEFLKIAQSNTSPDGKVYATALDLHITAAYMNNTYKSCSQVSVPSTGQKAFDLMCGSYMAARCSPTKWFGFMGDQDSNPYAPFQINYIQHENSSTSQGYTPLDSKTTPCNEKLNDKTPACGCSDCEASCPVPVPEPPRPEPFKIAGLDAFAVIMTVVFFVGTLLFLMGVCLFPSKRSEHDENEVDGTQGPLDEYETGYFENLGAKTEKCLEAFFTTWGKFFARRPKMTLIGGICFVIAMGYGIKFLHITTDPVQLWASPQSKSRIEREFYDSKFQPFYRLEQVIIHA…	69.04	0.0	gi|194761678|ref|XP_001963055.1|	GF14130 [Drosophila ananassae]	42.18	0.0	sp|P56941|NPC1_PIG	Niemann-Pick C1 protein OS=Sus scrofa GN=NPC1 PE=2 SV=1	69.04	0.0
252	Unigene32026_17	GL20696 [Drosophila persimilis]	37251.014844	0.069	2	5	-	0.76	0.759|0.760	0.000	5|5	0.177|0.181	0.84	0.925|0.762	0.013	5|5	0.806|0.063	0.71	0.653|0.773	0.007	5|5	0.102|0.259	1.05	0.959|1.145	0.017	4|5	0.833|0.468	0.78	0.783|0.785	0.000	5|4	0.037|0.169	1.09	1.182|0.998	0.017	5|5	0.630|0.996	Unigene32026_17	YPYYGGLRGQILQVVRTKDGQDNMFIISPTSIPNGSIKSISTTKGSFPISEDDDQLNNKSLTSIAFEQDFNRIQIAAARLVAIQEVAKRKGSFSVEDNRIYAESLLELGRAAQNLANLHETGQIKDFSLLLQPDFQVPHKKPLFPLESVAESEVSNGEQKVDEVTEQLFNEEDLLPPNTEDPYEDVSDTIAVTAPKKDASVAEAKPIGLSIAGEGGVASSKPNAIALSGRNGLAVSAPKATAIAGVSAEEAAAFSVSIPNRNNLVIKNVNHLSQRPAYDDYNEDYSDVLPARSTFTRDTTVTHGSYIPVISKKTKVASVTEAGSDAGFADSLVKQWKTIIAEDYSA	54.49	3e-81	gi|195169836|ref|XP_002025720.1|	GL20696 [Drosophila persimilis]	-	-	-	-	54.49	1e-80
253	Unigene15339_17	GK21487 [Drosophila willistoni]	42552.087422	0.042	1	6	-	1.91	1.818|1.999	0.016	6|4	0.004|0.001	1.8	1.504|2.098	0.176	6|6	0.001|0.001	2.6	2.851|2.342	0.130	6|6	0.001|0.002	0.84	0.894|0.791	0.005	4|4	0.569|0.053	2.1	2.125|2.075	0.001	5|6	0.000|0.002	0.87	0.948|0.794	0.012	4|5	0.868|0.092	Unigene15339_17	RLAVMHMGAPACGMNAAVRSFVRNCIYRGDTVFGVHDGIEGLIAGNIKEMGWSDVTGWVGQGGAFLGTKRTLPEGKFKEIAARLKEFKIQGLLVIGGFEAYHACGQISDQRPNYPEFCIPMVVVPSTISNNVPGTEFSLGCDTGLNEITEICDRIRQSAQGTKRRVFVIETMGGYCGYLATLAGLAGGADAAYIYEEKFSIKDLQQDVYHMASKMAEGVQRGLILRNEKASENYNTDFIHRLYSEEGKGLFSCRMNILGHMQQGGSPTPFDRNMGTKMAAKCVEWLNDQVKLNIKPDGTVRCESTDSACLLGIVRRQYRFTPLADLIAETNFEQRIPKTQWWLKLRPLLRILAKHDSAYEEEGMYITVEEECATDAVA	86.13	0.0	gi|157114499|ref|XP_001652300.1|	phosphofructokinase [Aedes aegypti]	88.10	0.0	sp|P52034|K6PF_DROME	6-phosphofructokinase OS=Drosophila melanogaster GN=Pfk PE=2 SV=2	86.13	0.0
254	Unigene15706_17	GA13776 [Drosophila pseudoobscura pseudoobscura]	13599.823637	0.724	4	29	-	1.71	1.753|1.660	0.004	29|28	0.001|0.001	0.8	0.824|0.774	0.001	27|26	0.004|0.002	1.71	1.659|1.757	0.005	28|27	0.001|0.001	0.98	0.957|1.003	0.001	26|28	0.543|0.967	0.84	0.865|0.820	0.001	29|25	0.004|0.001	0.49	0.503|0.476	0.000	26|27	0.001|0.001	Unigene15706_17	MASAKLFLAVAILATFSLTVNAGFLDYVYPTIMAEFYSLAPTKEGYRFNLEEPNGSKREEIGVVMNPGTNDEQLVVMGSYTVYDEKTDIETITMYTADKDGYKPRYMIKNRKLSPGALKSAAG	75.61	1e-50	gi|195159176|ref|XP_002020458.1|	GL14004 [Drosophila persimilis]	38.71	2e-06	sp|P92192|LCP5_DROME	Larval cuticle protein 5 OS=Drosophila melanogaster GN=Lcp65Ab1 PE=1 SV=1	75.61	7e-50
255	Unigene31892_17	GI20721 [Drosophila mojavensis]	45885.35866	0.036	1	1	-	1.01	1.115|0.909	0.021	1|1	0.915|0.907	1.32	1.210|1.430	0.024	1|1	0.783|0.663	1.26	1.458|1.070	0.075	1|1	0.650|0.936	0.87	0.820|0.912	0.004	1|1	0.800|0.874	1.41	1.431|1.383	0.001	1|1	0.581|0.637	1.34	1.150|1.526	0.071	1|1	0.850|0.566	Unigene31892_17	CRNYLSNEYKNTLVDFNVHALETDNVQSKGNPAQGIILVDIVNGIAHNNRNNEFSESLLKLRSVPDKATQFDATNYAIFRKFFDQENLDELLPIIKNRLQSGIFIDNFIGCYILNQLLQENNFTGATEVSLEIFKQDSLDNKLVVGLILKSIFEYLKQNIEQIFPPVVKEKKSGKKSDEKKVRVKFIRNFEGTNQLAREIGKAICRISELYPNQLTENLKLLGSLLDDRHNLATSLLRNKEINIRRQTLELSQILLKNKEGVDDNLTNGINRRLEEAADSKNIDALLSTFLEEAGKEDEMKLIKQQKAKYEIWKEQDVLEKNKKINIIPPSQRKEIIDQIVSDVTQQRQKLWYFENEELVDLEIFKKNKSYPKRWFGKKKKPKVVDDNYVPPEI	26.11	3e-31	gi|195122774|ref|XP_002005886.1|	GI20721 [Drosophila mojavensis]	-	-	-	-	26.11	1e-30
256	Unigene15846_17	GD22207 [Drosophila simulans]	10889.996192	0.152	1	2	-	1.41	1.357|1.458	0.005	2|2	0.448|0.301	1.01	0.995|1.016	0.000	2|2	0.995|0.984	1.92	1.851|1.991	0.010	2|2	0.108|0.063	0.73	0.731|0.733	0.000	2|2	0.332|0.224	1.35	1.367|1.331	0.001	2|2	0.410|0.544	0.71	0.741|0.679	0.002	2|2	0.451|0.293	Unigene15846_17	MASIATKGSALVNKLLVQAKPQLETFLKYAKVELTPPTPGDIPAIRQGIGRLISGARNGAYKNLTVKEAWLNTLVTAEVIFWFYIGECIGKRHLVGYKV	81.82	9e-44	gi|195118734|ref|XP_002003891.1|	GI18153 [Drosophila mojavensis]	53.61	6e-24	sp|Q28852|ATP5L_BOVIN	ATP synthase subunit g, mitochondrial OS=Bos taurus GN=ATP5L PE=1 SV=3	81.82	4e-43
257	Unigene29707_17	GH22627 [Drosophila grimshawi]	73345.920003	0.051	3	3	-	1.28	1.253|1.309	0.002	3|3	0.314|0.209	0.99	0.997|0.988	0.000	3|3	0.995|0.979	1.23	1.191|1.275	0.004	3|3	0.444|0.261	1.04	1.036|1.045	0.000	3|3	0.905|0.837	0.96	0.961|0.950	0.000	3|3	0.910|0.912	0.77	0.800|0.743	0.002	3|3	0.315|0.164	Unigene29707_17	QDTAPTRGLLYPLESESREVRTLDGIWRFLQSDVNDPMKGVRDGWFKADLDKVRSTRPMPVPSSYNDISAEINLRDHIGTVWYERKFFIPHSWNMDQRIWLRFGSVHYAAIVWINGKKVMSHSIGHLPFESEITDCVNFGAENRLTLLCDNTLVNSTIPQGTVVEEESDNGKVIMQRYTFDFFNYAGIHRTVHLYTTPAVYIEDVKILTDLIENQVGHVHYEVIVNGNERKAVVYDPPIEPLYVHVQLRNKEGEIAAHSVSKTTLNGTIVVKNVMPWWPYLMSSEPGYLYTMELYLHAVDESLLDVYRMKIGIRTLKWNNSTFLLNDAPIYLRGFGRHEDSDIRGKGFDYALLTRDFNLIKWIGANAYRTSHYPYSEESMQFADEFGIMIIDECSGVNT…	63.61	0.0	gi|195058391|ref|XP_001995443.1|	GH22627 [Drosophila grimshawi]	43.71	6e-153	sp|P12265|BGLR_MOUSE	Beta-glucuronidase OS=Mus musculus GN=Gusb PE=2 SV=1	63.61	0.0
258	Unigene14717_17	5 1063 RE16761p [Drosophila melanogaster]	40722.380287	0.297	7	46	-	0.86	0.881|0.841	0.001	46|45	0.078|0.003	0.95	0.981|0.918	0.002	46|45	0.813|0.011	0.89	0.889|0.884	0.000	46|46	0.177|0.168	0.98	0.980|0.988	0.000	44|46	0.750|0.864	0.97	0.995|0.949	0.001	44|43	0.959|0.184	1.08	1.085|1.079	0.000	46|46	0.308|0.335	Unigene14717_17	SEGLFHKAIVQSGAYYNPWAQPEHKGVPAKRARKVAQLVGCNPEENWQNILRCLRTKKASDVVATLYDLYEWDFDPVVPFQPVVEPPHESAFLTILPRDGVMPHGFSLPLMIGVTSEEGLFKSMPMLTVPGLLTDFKDHVQNILPIQLQYDHHAPEVRDEITRQIEQFYFKEGHNYSKYNHHNLTDLYSDGWFIAGIDEYIKQRVEAQNSKQLPPFYVYIFEHRSPASFTELLGGDTEEFFGVCHADELQYLFPLGLSLFVSSSPTENDIKLREAILEMWVNFAAEGNPTPSQSNLTPWAPVTGYPVNYARLGHKAPEEFTVLQMERDIYGDRTNFWRQLKAHLPAEQRERKL	68.86	8e-143	gi|386266705|gb|AFJ00067.1|	carboxylesterase [Bactrocera dorsalis]	25.87	5e-23	sp|B2D0J5|EST6_APIME	Venom carboxylesterase-6 OS=Apis mellifera PE=2 SV=1	52.68	2e-106
259	CL1118.Contig13_17	GA16892 [Drosophila pseudoobscura pseudoobscura]	43688.330752	0.070	2	9	CL1118.Contig11_17;CL1118.Contig10_17;CL1118.Contig9_17;CL1118.Contig3_17;CL1118.Contig2_17;CL1118.Contig4_17;CL1118.Contig12_17;CL1118.Contig8_17;CL1118.Contig7_17;CL1118.Contig6_17;CL1118.Contig1_17	1.07	1.099|1.034	0.002	9|9	0.202|0.801	0.97	0.910|1.034	0.008	7|9	0.375|0.829	1.22	1.237|1.208	0.000	9|8	0.009|0.011	0.92	0.953|0.878	0.003	8|9	0.564|0.057	1.12	1.134|1.099	0.001	9|9	0.115|0.223	0.93	0.879|0.983	0.005	9|9	0.069|0.924	CL1118.Contig13_17	YGQRVPTAASPSNTNSSSSSNTGSQSGTLSTSLSNTNTNTTMGPSNGTQQQGEQLSKTNLYIRGLQQGTTDKDLVSMCAQYGTIISTKAILDKTTNKCKGYGFVDFELPAYAEGAVKGLQAKGVQAQMAKQQEQDPTNLYIANLPPHFKETDLENMLSKYGQVVSTRILRDQQMNSKGVGFARMESREKCEQIIQIFNGNTIQGAKDPLLVKFADGGPKKKNLYKNPDPNARTWRDPTEGMPVTYDPTMQQNGVSVNVGTPIGVPYSRFSAPPVSSYPMTTGSQWIPGYMMTQQIPQVEDQYIQMAAAPQLGVASYKPDAVNQVQPRGISMMVSGDPSVPYGPMVPQLATLQIGNSYISPTYPYYAQPTIIPTMPMTDSEQASTAASPDEAYTQYPHPA…	89.71	2e-179	gi|198465625|ref|XP_001353703.2|	GA16892 [Drosophila pseudoobscura pseudoobscura]	88.35	4e-168	sp|B4MM23|SHEP_DROWI	Protein alan shepard OS=Drosophila willistoni GN=shep PE=3 SV=2	89.71	7e-179
260	Unigene15895_17	GH17468 [Drosophila grimshawi]	56160.092767	0.135	4	42	-	1.16	1.142|1.176	0.001	41|39	0.043|0.021	1.39	1.411|1.373	0.001	41|39	0.001|0.001	1.05	1.001|1.103	0.005	38|40	0.992|0.109	1.16	1.153|1.157	0.000	36|37	0.001|0.014	1.25	1.251|1.257	0.000	39|39	0.000|0.000	1.2	1.253|1.147	0.006	38|40	0.001|0.005	Unigene15895_17	MEHEDNAHFDNFLQNSQHLMENLQMDSGDGVCDNVAVDEIGGKFEVHEEHDDEEEWKYIEEGQQSEKQQQQQLKAGVACKDVEGVEEIGNGHGYGYEHGEVGADDILLLDHHEVGNGVVGISAAVDANVDDAATGIEENEEADVEVIKKDGDFSTTSTTTSTAGEDGCTDTGVLQVQMQIEHIPQEQSHKKQFEDILEEGTNIGSIADETEEDDPSSLATNNTNRTNSLSESSPHQELQQLPTEENMIKSEEISNEDKENTVPLIKNAHGFILFEEKTGNSDFESEMHSQLNPHATEFVPSFGSNPNSPTTGNNDNKVFVVEEVASNSAEEIQLRTQPNSLPRHLLGDDDFVAQSPRKGSAESNLDAIALPEENDFEHEAAKRPHELEQEDDLIGVGTV…	36.17	2e-29	gi|194740810|ref|XP_001952883.1|	GF17495 [Drosophila ananassae]	33.43	1e-24	sp|P23226|MA205_DROME	205 kDa microtubule-associated protein OS=Drosophila melanogaster GN=Map205 PE=1 SV=2	36.17	8e-29
261	CL223.Contig1_17	GH20991 [Drosophila grimshawi]	38919.007222	0.177	3	4	-	1.83	1.878|1.783	0.005	3|3	0.009|0.016	1.09	1.089|1.086	0.000	4|4	0.825|0.798	1.81	1.657|1.961	0.046	4|3	0.266|0.007	0.92	0.933|0.907	0.000	4|4	0.727|0.431	1.17	1.150|1.195	0.001	4|4	0.434|0.588	0.72	0.716|0.717	0.000	3|4	0.108|0.115	CL223.Contig1_17	MPSLEVNVNKVVVHPLVLLSVVDHFNRMGKIGNQRRVVGVLLGCWRSKGILDVSNSFAVPFDEDDKDKSVWFLDHDYLENMYGMFKKVNARERVVGWYHTGPKLHQNDIAINELIRRYCPNSVLVIIDAKPKDLGLPTEAYIAIEEVHDDGSPTSKTFEHVPSEIGAEEAEEVGVEHLLRDIKDTTVGSLSQKITNQLMGLKGLNAQLHDVKHYLQRVGDGKMPINHQIVYQLQDIFNLLPDITSEQFTETMYVKTNDQMLVVYLASMVRSIIALHNLINNKLTNRDAEEGKKADKEAEKEKEKNKDKDKDKEKDGKDVKDKDKKADDKSAKSTEDSGGKGGKK	96.21	5e-143	gi|195436394|ref|XP_002066153.1|	GK22207 [Drosophila willistoni]	95.08	8e-143	sp|P26270|PSD7_DROME	26S proteasome non-ATPase regulatory subunit 7 OS=Drosophila melanogaster GN=Mov34 PE=1 SV=6	96.21	1e-142
262	Unigene15137_17	112 420 mitochondrial F1F0-ATP synthase subunit Cf6 [Glossina morsitans morsitans]	11648.10346	0.214	2	29	-	0.66	0.709|0.615	0.004	26|25	0.001|0.001	0.7	0.708|0.685	0.000	24|25	0.001|0.001	0.61	0.624|0.600	0.000	26|28	0.001|0.001	1.06	1.070|1.044	0.000	26|29	0.018|0.276	0.69	0.733|0.650	0.003	29|24	0.000|0.000	1.08	1.013|1.146	0.009	24|27	0.903|0.054	Unigene15137_17	MLSQSVMSSVRVLRTEARRSIGIMAPALNKVSDPIQQLFLDKVRDYKKRSSGGKLVDPTPETEREMKNELERVAKQYGGDGKVDMTKFPEFKFPEVKIDPITS	77.45	8e-43	gi|195107750|ref|XP_001998471.1|	GI23616 [Drosophila mojavensis]	74.51	5e-41	sp|Q24407|ATP5J_DROME	ATP synthase-coupling factor 6, mitochondrial OS=Drosophila melanogaster GN=ATPsyn-Cf6 PE=3 SV=1	78.64	2e-42
263	Unigene15694_17	248 874 odorant binding protein 3 [Glossina morsitans morsitans]	25419.958765	0.053	1	1	-	1.01	0.979|1.034	0.002	1|1	0.978|0.974	0.99	1.060|0.911	0.011	1|1	0.951|0.920	1.26	1.259|1.251	0.000	1|1	0.783|0.771	0.8	0.827|0.770	0.002	1|1	0.749|0.561	1.23	1.103|1.355	0.032	1|1	0.916|0.660	0.97	1.061|0.869	0.018	1|1	0.940|0.844	Unigene15694_17	DTDILRNCLREVGSKDLVGELQKVARYSKWTSEEVPCFTRCLASKKRWFDADESKWNKQQIADDLGADMFNYCRYELDRYNEDSCEFAYTGLRCLKQAELYTLETYKNILSCATELNVTMKELQKYAVFPTKEVVPCLFQCLAEKMHFYTSTYEWNFDNWIKAFGPMRQDRTASNVCKAGAEQMKTRHKCEWMYEEYNCLERLNYNTDG	48.58	2e-60	gi|296142211|gb|ADG96060.1|	putative odorant binding protein [Stomoxys calcitrans]	-	-	-	-	48.58	7e-60
264	CL439.Contig2_17	GE18334 [Drosophila yakuba]	68324.4445070001	0.041	2	2	CL439.Contig1_17	1	0.892|1.107	0.023	2|2	0.831|0.859	0.97	0.957|0.976	0.000	2|2	0.955|0.972	1.09	1.030|1.155	0.008	2|2	0.967|0.781	0.92	0.969|0.872	0.005	2|2	0.957|0.686	1.05	1.013|1.086	0.003	2|2	0.985|0.908	0.96	1.050|0.868	0.017	2|2	0.932|0.774	CL439.Contig2_17	IRLIDYERIVDERGARQVAFGKYAGVAGMVNILHGVGLRLLALGHHTPFMHIGPAHNYRNSSMARQAIRDCGYEISLGMMPKSIGPLTVVFTGSGNVSQGAQEVFQELPIEYVPPEMLRKVAEHGSQNKLYGCEVSRSDHLERREGGGFDAREYDEFPERYISTFSSKIAPYASVIINGIYWAVGSPKLISIPDAKNLLRPANTPWLPTSKGSPALPHRMLAICDISADPGGSIEFMNECTTIDTPFCLYDADRNKDMKSFKGPGVLVCSIDNMPTQLPRESTDYFGELLSPFVDDIIKSDAKKPLEEENFPYPIKSAIIASNGRLTDNFQYIQELRDSSSYRSRHKIEGRFEASKKVLVLGAGMVSAPLVEWLTREKDVSITVCSALKEEADSLARKY…	89.40	0.0	gi|195471423|ref|XP_002088004.1|	GE18334 [Drosophila yakuba]	56.14	0.0	sp|A8E657|AASS_BOVIN	Alpha-aminoadipic semialdehyde synthase, mitochondrial OS=Bos taurus GN=AASS PE=2 SV=1	89.40	0.0
265	Unigene14511_17	132 611 minus strand translation initiation factor 5A [Glossina morsitans morsitans]	18069.586755	0.794	8	151	-	0.79	0.844|0.744	0.005	146|144	0.001|0.001	0.9	0.856|0.952	0.005	139|147	0.001|0.228	0.76	0.790|0.727	0.002	147|145	0.001|0.001	1.03	1.021|1.047	0.000	146|148	0.381|0.003	0.88	0.954|0.801	0.012	151|141	0.189|0.000	1.13	0.999|1.264	0.035	147|150	0.981|0.001	Unigene14511_17	MAEMDDHHFETGDSGASQTYPMQCSALRKNGFVMLKGRPCKIVEMSTSKTGKHGHAKVHMVGIDIFTNKKYEDICPSTHNMDVPHVKREDYQLTDISDDGFLTLMSDNGEIREDLKVPEGDLGNSLRSDFDNGKDLLCTVLKSCGEECVIALKTNTALDK	86.88	5e-80	gi|270012283|gb|EFA08731.1|	hypothetical protein TcasGA2_TC006406 [Tribolium castaneum]	86.88	9e-81	sp|P62925|IF5A_SPOFR	Eukaryotic translation initiation factor 5A OS=Spodoptera frugiperda GN=eIF-5A PE=2 SV=1	96.88	2e-87
266	Unigene6565_17	GK20886 [Drosophila willistoni]	39220.130711	0.172	5	8	-	1.14	1.170|1.108	0.002	8|8	0.474|0.295	1.09	1.147|1.041	0.006	7|8	0.133|0.738	1.06	1.024|1.086	0.002	7|8	0.935|0.640	1.03	1.035|1.021	0.000	8|8	0.832|0.860	1.03	1.019|1.047	0.000	8|8	0.912|0.872	0.92	0.910|0.927	0.000	8|8	0.621|0.551	Unigene6565_17	VVSAQPNENVIVSPISIETCLALAYLGAEGQTAEELATSLQLTQAGDKRSVAQKFGRLFEKTKSVGTATFRLANRIYLDERFQISTNYNELAVNQMHANAESVHFADATATAAAINSWVEAETDNKIRGLIASNSLDANTALVLVNALYFKAKWLHQFNNHSTTKRDFHVSAARKLEVDMMKQTDTFLYGDFKELDATAIELNYLDTDVSMLVLLPKSVDGLAALEAKLKSVDLTKLSTAMRSEEVIIHLPKFKFEFDLALKPVLAQLGVTTMFSDKADFSSMLAEREKVAVSQAQHKAFIEVNESGTEAAAATYLKIVPLSATFTQQTYQFIADHPFVFAIKDNENVYFVGHVT	45.15	4e-85	gi|195426523|ref|XP_002061378.1|	GK20886 [Drosophila willistoni]	36.69	2e-52	sp|P50453|SPB9_HUMAN	Serpin B9 OS=Homo sapiens GN=SERPINB9 PE=1 SV=1	45.15	2e-84
267	CL2164.Contig1_17	GH18264 [Drosophila grimshawi]	181368.524001999	0.011	2	5	-	0.86	0.826|0.893	0.002	5|3	0.143|0.645	0.88	0.830|0.926	0.005	4|5	0.284|0.710	0.89	0.921|0.867	0.001	5|5	0.644|0.226	0.98	1.072|0.892	0.016	5|5	0.607|0.213	0.88	0.874|0.876	0.000	5|3	0.240|0.674	1.01	0.949|1.077	0.008	5|4	0.840|0.727	CL2164.Contig1_17	ISKSAEGESGNANTSASAFKTANSESGNIQSVKSTKLLPALGNHDANTGEHKSGETLVLNRVESHETENTKEVLKESEMKVKEGTSNVSTGHHASSQITNKSADTQELNTGHIERVFSQADEWLGKSLPTVGLEKHINNGLDEMTLRENEKKPVNADSIDKQTEQPATTEGNLKDLEDIAVKLNSPTTSRAEDISSMLEGKSESGHNAVGLEESMGRSMDAAHSSENKLEVAFGEKAKGNEIPAAIKPMLGTKTNVEGGIKVSEENGSDVHSNEPKSDGEIIENPKIENLHPNEATGTETESLAGIIAQPAVTQVEAQTNLHVNNASSAEKRAKFFNDNSTSSQMKMNLPNGPEVWSLAGMRMVPKAPNVNGTPLLENKSADQPWQANEILTTERTINV…	76.57	0.0	gi|195108059|ref|XP_001998610.1|	GI24071 [Drosophila mojavensis]	31.87	2e-35	sp|P43378|PTN9_HUMAN	Tyrosine-protein phosphatase non-receptor type 9 OS=Homo sapiens GN=PTPN9 PE=1 SV=1	76.57	0.0
268	Unigene471_17	AGAP006516-PA [Anopheles gambiae str. PEST]	62677.741693	0.122	3	4	-	1.11	1.037|1.180	0.010	4|4	0.942|0.473	1.02	1.008|1.027	0.000	3|3	0.991|0.957	1.19	1.171|1.200	0.000	4|4	0.447|0.235	1	1.046|0.946	0.005	3|4	0.890|0.865	0.93	0.978|0.877	0.005	3|3	0.955|0.679	0.91	0.922|0.890	0.001	4|4	0.780|0.736	Unigene471_17	DASGFPSQTPPPYSHERPFRTPKGEKGERGPKGPPGDSIRGPPGPPGPPGPKGESATFPPFVDFPTGPDAKYTGKCTCNASDILEAIKDNEILRETIRGPPGLPGKEGKTGAPGLTGATGKPGERGAPGPKGDRGDRGDPGSRGPEGLQGHKGEPGVDGMPGMLGPPGPPGPPGLPDNYDESLMGNSMRPMRSSSPGPKGPPGDKGDAGMVGERGQQGQKGERGDPGMTGEKGDRGHPGVHGVAGQKGEQGQPGVPGMAGAPGAPGLKGDRGLPGELGPIGPPGPPGEVIYADNSLNGTTSSAAGGQCQCPAGAPGPPGTRGPQGYEGPPGLNGEPGPAGSNGLTGLPGSKGEKGEKGVRGLSGPKGDRGPEGPPGQAFFAAGYEGMAINGTKGEKGEK…	68.21	3e-49	gi|198464724|ref|XP_002134828.1|	GA23588 [Drosophila pseudoobscura pseudoobscura]	-	-	-	-	68.21	1e-48
269	CL1136.Contig1_17	GA12941 [Drosophila pseudoobscura pseudoobscura]	14531.299337	0.481	4	8	-	0.81	0.784|0.837	0.001	8|8	0.014|0.135	0.65	0.652|0.646	0.000	6|8	0.001|0.008	0.72	0.646|0.794	0.011	7|8	0.001|0.176	1.12	1.062|1.179	0.007	8|7	0.546|0.027	0.6	0.628|0.569	0.002	8|8	0.008|0.001	0.82	0.802|0.838	0.001	8|7	0.093|0.086	CL1136.Contig1_17	MNSSVSFLLLMICAIVLVAQQGQAKKGCNAYGQACYGGHGKRSLSSLTDEMLANNAYRNEREELHPNEMLQAMPNEATGLLTDRAIIDTFPRYRLIKIMRSLLGGHLKRPVERANEIDYPISAEAFSRD	46.97	6e-23	gi|198451489|ref|XP_001358386.2|	GA12941 [Drosophila pseudoobscura pseudoobscura]	-	-	-	-	46.97	3e-22
270	CL829.Contig1_17	GI24066 [Drosophila mojavensis]	27197.974313	0.139	1	1	-	1.34	1.429|1.258	0.015	3|3	0.144|0.445	1	1.009|0.987	0.000	3|3	0.991|0.985	1.13	1.117|1.150	0.001	3|3	0.665|0.525	1.19	1.121|1.259	0.010	3|3	0.727|0.140	0.85	0.890|0.800	0.004	3|3	0.631|0.376	0.74	0.718|0.764	0.001	3|3	0.114|0.219	CL829.Contig1_17	VFTRMRAILFTISILCLLMLNVSSDDKNKEQSNAEIWQEDLTDTFKIEGSDQGIQKVNLKCGSNSMNVMLETEKPFTGVMYTRGSFYKQSAPCFVKSSTQNSRSMEMNFQLDQCQTLKDGELYSNIVVIQNDPELITPGDSAFSLECDFRQPRNLDVEANMQTRDRVARGSKITLTSPDPSTEAYHSSISYQSNTDSVEYAPRQQNPNDNQEDVIHEAGTMRLGTVEEVTYTQEKDEL	66.39	2e-84	gi|195500296|ref|XP_002097312.1|	GE24564 [Drosophila yakuba]	-	-	-	-	66.39	6e-84
271	Unigene7309_17	GA17230 [Drosophila pseudoobscura pseudoobscura]	106778.160952	0.016	1	1	-	1.01	1.013|1.014	0.000	1|1	0.984|0.992	0.68	0.654|0.705	0.001	1|1	0.462|0.616	0.85	0.798|0.904	0.006	1|1	0.790|0.902	1.19	1.128|1.249	0.007	1|1	0.851|0.646	0.58	0.635|0.517	0.007	1|1	0.457|0.313	0.66	0.641|0.688	0.001	1|1	0.435|0.538	Unigene7309_17	MPVFHTKTIESILDPVAQQVSRLVILHEEAEDGNAMPDLSRPVQVVSAAVANLVKVGRETINSSDDKILKQEMPASLQRVETASQLLEEASDMLRADPYSGPARKKLIEGSRGILQGTSSLLLCFDESEVRKIVQECKRVLDYLAIAEVINTMEDLVQFLKDLSPCLSKVSREVGAREKELTHQVHSEILVRCLEQVKILAPILICSMKVYIHIVEQQGKGTEEAAENRNYLASRMSDEIQEIIRVLQLTTYDEDTSELDNLTVLKKLSNAINNKSELANDWLSNPYALKGGVGEKALRQIIDNANEISERCLPQDAYPIRRMADEIGAMTNSLCELRQDGKGTSPQAESLARAIRGKLADLQSLVRNAVVGVDKAGLQQTAHTIQGRLEQAVKWLQHP…	91.36	0.0	gi|198470122|ref|XP_001355231.2|	GA17230 [Drosophila pseudoobscura pseudoobscura]	90.53	0.0	sp|O46037|VINC_DROME	Vinculin OS=Drosophila melanogaster GN=Vinc PE=1 SV=1	91.36	0.0
272	CL2010.Contig2_17	GI18805 [Drosophila mojavensis]	80535.518198	0.078	4	7	CL2010.Contig1_17	0.97	1.015|0.920	0.005	7|7	0.945|0.527	1.01	1.090|0.921	0.014	7|6	0.520|0.584	0.79	0.813|0.762	0.001	7|7	0.056|0.151	1.24	1.233|1.237	0.000	7|7	0.132|0.153	0.82	0.754|0.882	0.008	6|7	0.007|0.294	1.02	1.063|0.983	0.003	7|6	0.669|0.920	CL2010.Contig2_17	KMESFWVQSAIGAIKVLAFVCDIITLPVYLVLQRPWKRREESRRVKARVVSSDEHSLTYRTIEPPREVHVKMLQNNIDTLEKMFNYVAKVHSNKRCLGTRQILSEEDEVQPNGRIFKKYNMGEYKWKNFIETDRMATSFGRGLRECGQSARQNIVIFAETRAEWMIAAHGCFKQALSIVTVYATLGDDGVAHCISETEVTTVITSHELLPKFKQLLDKCPKVNTVIYMEDQLHKTDTSGFKNGVRVLAFSQVVRMGQESKFESVPPKPDDTAIIMYTSGSTGTPKGVLLSHQNCIATMKGFCDVVTVKPDDVLIGFLPLAHVFELLAESVCLMTGVPIGYSTPLTLIDTSSKIMRGSKGDATVLRPTCMTSVPLILDRISKGINDKVNSGSAFKKALFK…	84.32	0.0	gi|195122946|ref|XP_002005971.1|	GI18805 [Drosophila mojavensis]	49.22	8e-179	sp|O95573|ACSL3_HUMAN	Long-chain-fatty-acid--CoA ligase 3 OS=Homo sapiens GN=ACSL3 PE=1 SV=3	84.32	0.0
273	CL1244.Contig1_17	GJ14631 [Drosophila virilis]	16638.065405	0.500	6	128	-	0.66	0.643|0.682	0.001	128|128	0.001|0.001	0.86	0.868|0.847	0.000	126|124	0.001|0.001	0.54	0.538|0.532	0.000	128|128	0.001|0.001	1.24	1.283|1.191	0.004	128|126	0.001|0.001	0.7	0.675|0.722	0.001	125|124	0.000|0.000	1.28	1.303|1.266	0.001	128|128	0.001|0.001	CL1244.Contig1_17	AFLVVACAFFVCVCAATPDTKNTSLSNSDSEIKIYKRLIPADVLRDFPGMCFASTRCATVEPTKTWELTPFCGRSTCVQNDENQAKLLELVEDCGPLPLANEKCKLDTEKTNKTAPFPYCCPIFTCEPGIKLEYPEIPKEESKK	84.87	2e-55	gi|198462178|ref|XP_001352360.2|	GA16601 [Drosophila pseudoobscura pseudoobscura]	-	-	-	-	84.87	1e-54
274	Unigene14505_17	GF19170 [Drosophila ananassae]	44335.7658609999	0.458	9	49	-	1.16	1.180|1.143	0.001	45|46	0.001|0.001	0.98	0.978|0.988	0.000	47|48	0.790|0.863	0.95	0.920|0.978	0.002	48|49	0.196|0.770	1.27	1.221|1.324	0.005	48|49	0.001|0.001	0.75	0.802|0.702	0.005	45|46	0.000|0.000	0.85	0.870|0.836	0.001	42|49	0.001|0.001	Unigene14505_17	MKFQLVILSALFVGAFALPVPDEEVSPVVQAVPQVQEKSVEVQKVDEKVIDAVKPVEARAAELPAAAAATPLAAAAEKKEEKPADLPLNAPDAEISQSLPAEKKEEKKDKQTRADNQVEEAKALPVVAAAPVAAVAGNAEGPKQAEETIVAAEDKINLEGKSTIIAEAVPAEQKKDELSAAEETPVVKTDSAPAAAADNAPAATGTETKREEAPARQERVGEAVNEVDASALPAAPVAAEVVPVVKSLPAEETAPAAAPAAATPAVATDAAPEQLAGIEKQQPEAPKELLKSAASEPVAEKVQPAAQAPAGDILQQASEESAAKALKVEEPAQAAPIASVAAPEAKKIEEPAAAAAAVAAAPAEQPQQQQKEITPEVKESEPKTLEEKKPTAEAAKSSE…	77.27	2e-44	gi|312285626|gb|ADQ64503.1|	hypothetical protein [Bactrocera oleae]	-	-	-	-	77.27	6e-44
275	Unigene15912_17	GK13394 [Drosophila willistoni]	37597.2036629999	0.098	2	5	-	2.06	2.268|1.849	0.088	4|5	0.001|0.001	1.29	1.363|1.211	0.012	5|5	0.019|0.200	2.7	3.100|2.298	0.322	3|4	0.001|0.001	0.73	0.704|0.760	0.002	5|4	0.090|0.027	1.69	1.660|1.716	0.002	5|4	0.000|0.006	0.67	0.658|0.681	0.000	3|4	0.044|0.026	Unigene15912_17	DPELDPYRPSRKFSAPLSLDDHAGEETKEKQRLRHERLMTVGEEVLDEIQLEKKKALMKTMDDSKGREQRTLEESIQQKFKKDTKKKLIRIERKEQDEAIFKSSKQDALKVEEARLAEEAHLVENARLTEEARLAEETRKAEEDRLAKEARLAEESRLAEGRRIAEETRLKKAEEDRLAEEARLAEEEARKFEEARLAEEEARKLEEARLEEEKRLRDEELIRLAEIEKQAIDEQERELARQAAELAEIARQEAELAAQELHAMQQADQINSSDLDDTTKAATESIIEEPVTPVGEIHREPVIELSTEIDELSDTEGAAAEEEDVE	62.16	2e-14	gi|386765505|ref|NP_001247030.1|	fau, isoform G [Drosophila melanogaster]	62.16	3e-15	sp|Q9VGX3|FAU_DROME	Protein anoxia up-regulated OS=Drosophila melanogaster GN=fau PE=1 SV=3	62.16	2e-13
276	Unigene6241_17	GK13836 [Drosophila willistoni]	104104.309521999	0.071	5	8	-	1.02	0.999|1.037	0.001	8|8	0.989|0.824	0.93	0.953|0.911	0.001	8|8	0.714|0.388	1.04	1.048|1.033	0.000	8|8	0.843|0.887	1.01	1.022|1.002	0.000	8|7	0.926|0.987	0.89	0.905|0.872	0.001	8|6	0.549|0.258	0.91	0.940|0.871	0.002	6|8	0.741|0.073	Unigene6241_17	MRSPYDDFSIVSDSGEEGRENYYNYGNKNYSCTIPYHARENSLPFSYGQINKTSTSLRSISAGNEIGGLHRSQRGVDAASSDVIDFGFDSSSTPSKADVNYSMDGNLYYGTNYNNAHNNGLTATLRSTTATTKTSPQGGNTDVISTIKAQPRLTSPILVRKTLNSQSPTRNGATNTNTIANTYHYKYGNDDDNVFGAPVSVNNGGHSNTLKGKFHSDSNGYSKDLKHNCDNSRKNYISNNNNSNKFGVGDTINGSVNVRQIHPRNDFEELLRERREKVFREHYRSVGSTQTSDGINGSRCGTSPNSPKFNYDFEFHLNVDDAPPPPRRAHTMERSSLQQLQQYRTRDIPVACEVATPTVNTSIVGRNYHTISSSTADRTAGETYAPTQQYSRMRQEIQP…	91.44	1e-125	gi|312285490|gb|ADQ64435.1|	hypothetical protein [Bactrocera oleae]	42.21	6e-76	sp|Q9GLM4|TENS1_BOVIN	Tensin-1 OS=Bos taurus GN=TNS1 PE=2 SV=1	91.44	4e-125
277	CL1453.Contig1_17	GI14634 [Drosophila mojavensis]	55207.1678830001	0.030	1	1	CL1453.Contig2_17	1.1	1.101|1.097	0.000	1|1	0.910|0.911	0.79	0.809|0.777	0.001	1|1	0.747|0.733	0.96	1.025|0.893	0.009	1|1	0.981|0.893	1.15	1.235|1.057	0.016	1|1	0.697|0.924	0.7	0.636|0.755	0.007	1|1	0.458|0.690	0.71	0.724|0.698	0.000	1|1	0.593|0.549	CL1453.Contig1_17	MTFYWWSHWFWITTLSTVLLSITFVHTYPSQEISLEYNQNSKSVKAVTKLHQTATSLEWSTTTPTTLVTTSKKSTGSDEVVEPITQQKLNDNAGSAVEERPVSEDLDAKPVQAAYSELENAAVEEENIVENADGPTAEEGEYKRSAESYNKTIEDTKGRENEESVEEPQVAAVVAEQRSASFEENRQKLKRADKELSNYTNSSRKRDEPRGNATYAKCNTTALEPNSTAVATRTMEAPNSENKQPANNFTAATVHAKSRKDSLHPDTMEWLNAMAVAAALPVPKLLNNVPPSTEIVREVATVPTESATVGAMAAAATTTQQRIPFTLENVNKEEELRRAENEHRSRKSKVLSAEYKHINRYINYSSDTKSLLTRSASTTPNDFGGVEEGNISSEALSIQ…	89.83	4e-89	gi|195132187|ref|XP_002010525.1|	GI14634 [Drosophila mojavensis]	-	-	-	-	89.83	1e-88
278	Unigene7137_17	GH16896 [Drosophila grimshawi]	67623.0805550002	0.049	3	9	-	1.44	1.384|1.493	0.006	9|9	0.001|0.001	1.48	1.362|1.588	0.026	9|9	0.007|0.006	1.61	1.518|1.698	0.016	7|8	0.001|0.001	0.83	0.818|0.835	0.000	9|8	0.103|0.011	1.71	1.638|1.783	0.011	8|9	0.002|0.014	1	1.007|0.993	0.000	8|7	0.967|0.968	Unigene7137_17	MAQPQKPAYQNKFIYATLPRTQRGQPIVLGGDPKGKNFLYTNGNSVIIRNIENPAIADVYTEHSCAVNVAKYSPSGFYIASGDASGKIRIWDTVNKEHILKNEFQPIGGPIKDIAWSQDNQRIVIVGEGRERFGHVFMTETGTSVGEISGQSKPINSCDFRPARPFRIVTGSEDNTIGVFEGPPFKFKMTKQEHSRFVQAVRYSPNGKFFASAGFDGKVFLYDGATSDLVGEFGSPAHKGGVYAVAWKPDSTQLLTCSGDKTCRLWNVETRELITEFIMGTTVDDQQVSCLWQGEHLLTVSLSGNISYLNVEDPTKPLRVIKGHNKPITVLGLSDDRSTIYTGSHDGIVTNWNSGSGVNDRIGGTGHGNQINGIVAWGDFVYTCGIDDSLRQISIESNS…	89.64	0.0	gi|195020142|ref|XP_001985130.1|	GH16896 [Drosophila grimshawi]	88.16	0.0	sp|Q9VU68|WDR1_DROME	Actin-interacting protein 1 OS=Drosophila melanogaster GN=flr PE=2 SV=1	89.64	0.0
279	CL2467.Contig1_17	GK20099 [Drosophila willistoni]	78385.4694940002	0.165	8	23	-	1.08	1.018|1.143	0.008	23|23	0.947|0.065	1.16	1.210|1.103	0.006	20|20	0.001|0.024	1.09	0.982|1.192	0.022	22|21	0.926|0.001	1.04	1.012|1.062	0.001	22|22	0.919|0.466	1.12	1.092|1.139	0.001	21|23	0.027|0.025	1.06	1.182|0.931	0.032	23|20	0.149|0.418	CL2467.Contig1_17	MVNMENAEEVMQILERFTRLKQKEIPKELDDYLQYVAKTGDTVFKWASLKYLFREKLLNVIKHFHDTSPRVDEIPQYPNVDPFNYESMKSSLLERLELFNAAPFTIQRLCELLIDPRKQYSRIDKFMRALEKNILVVSTIEPGRKRTESENGDSLDSVVNGDLSLDVNVDIDMENESLFNMEAQNGNGTASTADGGESPESESKEKPAVSETATKHPTTDDDILPNPKKAKLDLDEKEEKAEEEQSGVSMEKGESKSAADDVKSKETEKVKSEPAAEVAKPPEDADMVEVDNKETDLKGNKQESKKGEQAEKKDVVDKTEEKQSEKNVEKEIETKAVAESNKKEDASKGDTTSSNEKVAAEEVDAVKKKEDNAELESESKSIKEEEKIVEKQEIEKGEK…	81.41	9e-101	gi|194768230|ref|XP_001966216.1|	GF19339 [Drosophila ananassae]	79.08	6e-97	sp|Q9W2U4|PP4R2_DROME	Serine/threonine-protein phosphatase 4 regulatory subunit 2 OS=Drosophila melanogaster GN=PPP4R2r PE=1 SV=2	81.41	3e-100
280	Unigene26163_17	GA21951 [Drosophila pseudoobscura pseudoobscura]	31360.9236	0.092	2	3	-	0.92	0.928|0.904	0.000	3|3	0.786|0.687	0.81	0.865|0.745	0.007	3|3	0.623|0.268	1.09	1.012|1.166	0.012	3|3	0.975|0.475	0.84	0.770|0.916	0.011	3|3	0.223|0.630	0.95	0.974|0.932	0.001	3|3	0.945|0.872	0.87	0.922|0.826	0.005	3|3	0.837|0.419	Unigene26163_17	MARNAEKAMTTLARWRAAKEAESGEKDRRPYLASECTSLPKCEKYRLEIIREISKKVAQIQNAGLGEFRIRDLNDEINKLLREKRHWENQISALGGPHYRRYGPKMFDAEGREVPGNRGYKYFGAAKDLPGVRELFEQEPPAPQRKTRAELMKDIDAEYYGYRDDDDGTLIPIEERIERIAIQKALQEWKEKMARDGHVDEEEEEEIYGSLKTPTDVNEDDAEAHKTVSSTEVGIDPLEMLAPRFTAHVPVPTQKDIEEALLKKRKQELLE	81.18	1e-115	gi|195390584|ref|XP_002053948.1|	GJ23062 [Drosophila virilis]	60.66	9e-80	sp|Q69ZQ2|ISY1_MOUSE	Pre-mRNA-splicing factor ISY1 homolog OS=Mus musculus GN=Isy1 PE=1 SV=2	81.18	4e-115
281	CL1541.Contig1_17	GK21691 [Drosophila willistoni]	47108.2822670001	0.326	10	44	-	0.95	0.950|0.947	0.000	43|44	0.228|0.194	1.21	1.248|1.181	0.002	41|42	0.001|0.001	1.14	1.086|1.197	0.006	43|44	0.117|0.001	0.83	0.789|0.863	0.003	44|43	0.001|0.001	1.43	1.420|1.449	0.000	43|43	0.000|0.000	1.25	1.305|1.201	0.005	44|44	0.001|0.001	CL1541.Contig1_17	ILLLLLASYQATQALENGLARTPPMGWMHWERFRCITDCQKYPNECISENLFKRTTDLLVTEGYAAAGYEFVIIDDCWLEKNRDNATNKLVEDRYRFPSGLNHLADYIHEAGLKFGLYQDYGTHTCAGYPGVINHMELDAQSFADWDVDYVKLDGCYADTTTMDAGYPEFGRLLNKTGRPMVYSCSWPVYQEYEGKIPDYEALKQHCNLWRNYDDIDDSFESVAKIMDYFSKNQDRIQPHGGPGHWNDPDMLILGNYGLSYDQSKLQMAVWAILAAPLIMSNDLAAVRPEIKAILQNREIIAVNQDPLGIQGRRVLIQKNVEVWTRPITPRNSAGEYSYAVAFVNRRTDGAPYPISFNLKEMGLNSQRGYDVVNLFEKTQKLGVIKQTHIFNTRIIPNG…	73.84	0.0	gi|195429918|ref|XP_002063004.1|	GK21691 [Drosophila willistoni]	50.64	2e-111	sp|Q90744|NAGAB_CHICK	Alpha-N-acetylgalactosaminidase OS=Gallus gallus GN=NAGA PE=1 SV=1	73.84	0.0
282	Unigene14845_17	GF13461 [Drosophila ananassae]	58580.4811510002	0.056	2	2	-	1.68	1.802|1.563	0.029	2|2	0.104|0.204	1.12	1.125|1.120	0.000	2|2	0.830|0.880	1.91	2.191|1.620	0.163	2|2	0.040|0.184	0.91	0.989|0.838	0.011	2|2	0.984|0.568	1.22	1.120|1.325	0.021	2|2	0.852|0.552	0.68	0.678|0.691	0.000	2|2	0.280|0.342	Unigene14845_17	ASPIKAFYTGKNVFITGATGFVGVTIVEKLLRDIPEIGTIYLLMRPKKGKTVAQRLEDIRKNSVFDKFKELKIDEKRFDKIVPIEGDVGQEHLGISETERQVLIDNVHVVFHSAATLDFFQSLKETTNINLLGTRRVVELCKQLTKLEALVHVSSAYVNSYITEVEEKLYPAPDDPEKVIHLAETLSDEALKELEPKLLKDHPNTYTFTKHLAEHEVANVASRFPCGIVRPSMITAAWKQPIPGWTISKNGPQGFFMGASRGILRRLPLDPTIIMDYIPVDVVVNAIITTGYYVNALKVKNAGKPAELQIFHLTSSTYKPFRFEYLINKINAFLHEYPLMSAVWYPNLKLVKSLFLFRLGAILFHFIPGFFLDLVTKLSGGRPILIRLHKSVWNSLNTL…	80.39	0.0	gi|195124219|ref|XP_002006591.1|	GI18498 [Drosophila mojavensis]	78.25	0.0	sp|Q960W6|FACR3_DROME	Putative fatty acyl-CoA reductase CG8306 OS=Drosophila melanogaster GN=CG8306 PE=2 SV=1	80.39	0.0
283	CL891.Contig2_17	GE10219 [Drosophila yakuba]	21149.897135	0.037	1	3	CL891.Contig1_17	0.85	0.776|0.922	0.011	3|3	0.254|0.770	0.89	0.894|0.884	0.000	3|3	0.745|0.715	1.13	1.122|1.143	0.000	3|3	0.652|0.544	0.75	0.801|0.692	0.006	3|3	0.240|0.025	1.18	1.100|1.261	0.013	3|3	0.721|0.345	1.03	1.114|0.953	0.013	3|3	0.765|0.883	CL891.Contig2_17	LFTFCGLSLFTQEAAAHVLVYRRINSLLIEQYNDLPAQFGPSLPANGIKVFAVPAAKDKYACGPLGAPPSIGYPTNAKFVVIIERGGGINCTFEKKVRNAQTSGFDAVIVFNNDGDDLEQMSAKNASGIYIPAVFVGHTTGINLMTFFTPEVILVINDELPFNINTQLILPFSILIGLCFLIMIFYMIYKC	63.92	3e-68	gi|194899051|ref|XP_001979076.1|	GG13423 [Drosophila erecta]	36.26	9e-22	sp|Q0VD51|RNF13_BOVIN	E3 ubiquitin-protein ligase RNF13 OS=Bos taurus GN=RNF13 PE=2 SV=1	63.92	1e-67
284	Unigene26552_17	5 745 minus strand PREDICTED: cytosolic non-specific dipeptidase-like [Monodelphis domestica]	27069.006426	0.032	1	1	-	1.64	1.935|1.352	0.170	1|1	0.276|0.637	0.56	0.284|0.843	0.156	1|1	0.099|0.856	1.49	1.569|1.415	0.012	1|1	0.516|0.605	1.1	0.967|1.223	0.033	1|1	0.965|0.687	0.55	0.882|0.220	0.219	1|1	0.891|0.078	0.39	0.175|0.613	0.096	1|1	0.053|0.419	Unigene26552_17	RDLHSGVFGGTVHEPMTDLAYIFSKLVTPKGEILIPGIMDDVAPLTDAEEASYPPLDFNLSTLHNAIDADNTIHDNHIDALKGRWRYPSLSLHGIEGAFSAAGAKTVIPAKVIGKFSIRSVPNMVPEKIDACVVKYINEEFAKLGSKNKIEVECLHAGKPWVASFEHPNYVAAAKAVERVFKVKPDLTREGGSIPVTLTFQDALNKNVLLLPMGRSSDGAHSINEKLDRSNYIEGTKLLGAYLWELS	62.35	2e-84	gi|126321906|ref|XP_001366150.1|	PREDICTED: cytosolic non-specific dipeptidase-like [Monodelphis domestica]	60.32	5e-83	sp|Q9D1A2|CNDP2_MOUSE	Cytosolic non-specific dipeptidase OS=Mus musculus GN=Cndp2 PE=1 SV=1	71.66	3e-99
285	Unigene15250_17	GJ20147 [Drosophila virilis]	25557.946487	0.450	7	50	-	0.93	0.926|0.938	0.000	49|47	0.157|0.090	1.03	1.035|1.019	0.000	50|49	0.234|0.750	0.94	0.919|0.969	0.001	46|47	0.016|0.396	0.96	0.948|0.969	0.000	48|49	0.044|0.305	1.06	1.071|1.039	0.001	50|49	0.016|0.148	1.11	1.132|1.086	0.001	46|47	0.001|0.015	Unigene15250_17	MRLGATMPNFKAETTMGRIRFFEWQGDSWVILFSHPSDFTPVCTTELARMAVRLPEFTKRNAKCLAHSVDDIETHNKWVKDIQSYCKDIPNEFPYPVIADPRRDLAVLFGMLDEDQKRDPVIAQTIRALYIISPDHKVRLSMFYPICTGRNVDEILRSLDSLQLTYKLKVVVTPVDWTPGNKVMIQPDVTDEEANKLFPKGYEKVSLPSGLDYVRTTEDY	76.36	2e-99	gi|195383650|ref|XP_002050539.1|	GJ20147 [Drosophila virilis]	54.59	1e-61	sp|O08709|PRDX6_MOUSE	Peroxiredoxin-6 OS=Mus musculus GN=Prdx6 PE=1 SV=3	76.36	6e-99
286	CL523.Contig1_17	2 649 prophenoloxidase [Musca domestica]	24593.171113	0.477	3	17	-	1.36	1.347|1.372	0.000	17|17	0.016|0.001	1.67	1.429|1.902	0.112	17|15	0.002|0.001	1.63	1.677|1.586	0.004	16|17	0.001|0.001	0.85	0.872|0.822	0.001	17|14	0.163|0.001	1.88	2.002|1.750	0.032	17|16	0.000|0.000	1.03	0.973|1.090	0.007	15|14	0.852|0.455	CL523.Contig1_17	DESGNSLPLDDVRGIDILGNIMESSIISPNRRLYGDFHNMGHVFISYSHDPDHRHLESFGVMGDSATAMRDPIFYRWHAYIDDIFQEHKVRLPPYTLPELDYDGVTVTGVQVSPEGGQPNVLQTFWQQSDVDLSRGMDFVPRGNVFARFTHLQHAPFTYTINVNNDSGAQRFGTVRIFLGPKTDERRQGMLFKDQRLLMIELDKFIVALNPGQNTI	93.06	1e-117	gi|400295074|gb|AFP81886.1|	prophenoloxidase 1 [Bactrocera cucurbitae]	71.76	8e-92	sp|Q9V521|PRPA3_DROME	Phenoloxidase subunit A3 OS=Drosophila melanogaster GN=proPo-A3 PE=1 SV=1	83.80	3e-107
287	Unigene37988_17	GK25605 [Drosophila willistoni]	11560.714927	0.079	1	1	-	0.82	0.572|1.075	0.127	1|1	0.470|0.935	1.63	1.317|1.951	0.201	1|1	0.661|0.380	0.62	0.503|0.734	0.027	1|1	0.364|0.654	1.57	1.910|1.223	0.236	1|1	0.282|0.694	1.12	1.010|1.231	0.024	1|1	0.990|0.788	1.55	1.575|1.527	0.001	1|1	0.424|0.568	Unigene37988_17	SVPPRVGISYQTNHPHPWRPTLAYEMIEVKNLAEQPVTNQLVKPCFSPSGMTTEPMNFPNLVTGFERNPQHAARAALFTRYTNNEWVNSNLTKYAESNINR	72.28	3e-40	gi|195447130|ref|XP_002071077.1|	GK25605 [Drosophila willistoni]	-	-	-	-	72.28	1e-39
288	Unigene14318_17	GK23971 [Drosophila willistoni]	43690.562809	0.040	1	1	-	0.77	0.730|0.802	0.003	1|1	0.656|0.755	0.85	0.678|1.015	0.057	1|1	0.498|0.987	0.93	1.077|0.774	0.046	1|1	0.940|0.721	0.86	1.042|0.681	0.065	1|1	0.957|0.356	0.97	0.979|0.963	0.000	1|1	0.985|0.974	1.08	0.901|1.262	0.065	1|1	0.888|0.736	Unigene14318_17	DVTDNKTNEVYLPQWKCEQFTMDEKYQREDERLNSFENWPLEWLNKKELAQTGLVYMGEDDKVKCYFCEVEIGHWERDDQPINEHLRFSPNCPLLRRRTTNNVPISSDTLSRVLPPVSYDVCGNEGHEFEANGVSADIAPTQNALTTAMHQYDSIAIDNLPNHHSNVNSSDSRCGNETQLYRPEYPEYAVEAARLRSFGEWPRNMKQRPKELADAGFFYTGTGDRVKCFSCGCGLKDWDDDDEPWEQHALWFPKCRYLNLLKGQSYIDSVATKYKTNNSKCADAVSAESDQYPTSDNIVVQSVVATATLSTTSNTKEATAEATIAEEKLCKICYADEYNTAFLPCGHVVACAKCASSVSKCPVCRKPFTNVMRVFF	53.19	1e-109	gi|83595237|gb|ABC25070.1|	inhibitor of apoptosis 1 protein [Glossina morsitans morsitans]	46.68	3e-102	sp|Q24306|IAP1_DROME	Apoptosis 1 inhibitor OS=Drosophila melanogaster GN=th PE=1 SV=2	53.19	3e-109
289	Unigene14802_17	GJ10182 [Drosophila virilis]	61029.5586720001	0.101	4	7	-	1	0.930|1.077	0.011	7|7	0.513|0.402	1.16	1.156|1.168	0.000	7|6	0.172|0.553	1.17	1.053|1.277	0.025	6|5	0.761|0.061	0.89	0.857|0.931	0.003	6|6	0.172|0.660	1.22	1.249|1.196	0.001	7|7	0.069|0.390	1.13	1.209|1.046	0.013	7|7	0.047|0.774	Unigene14802_17	ASSGNGSTTSGSTTSGTGASGGGSMGGVGGGGGASTTGSSGEPPNDKNMLSCPKCGNPCTQVETFVSSTRFVKCAKCNHFFVVLSEVDTKKNAKEEPKNYRKPPPPPQKIMDYLDRHVVGQDFAKKVLSVAVYNHYKRIHHNLPQVQTQTNIQSSDAMGRTDLLHISGIGHTIGNTPGTELPPKGHLTGAGNSGSGGGAHYAHSDSGSEILDKQNYEVKLEKSNILMLGPTGSGKTLIAQTIARCLDVPFAICDCTTLTQAGYVGEDIESVISKLLQDANYNVERAQTGIVFLDEVDKIGAVPGIHQLRDVGGEGVQQGMLKMLEGTIVNVPERNSPRKLRGETVQVDTTNILFVASGAYTGLDRLIARRLNEKYLGFGIPSTNSSGRRAAQSTASPMD…	76.46	0.0	gi|195395804|ref|XP_002056524.1|	GJ10182 [Drosophila virilis]	61.24	9e-172	sp|Q5R7N3|CLPX_PONAB	ATP-dependent Clp protease ATP-binding subunit clpX-like, mitochondrial OS=Pongo abelii GN=CLPX PE=2 SV=1	76.46	0.0
290	Unigene431_17	GI24185 [Drosophila mojavensis]	39520.619531	0.041	1	1	-	0.78	0.755|0.805	0.001	1|1	0.690|0.760	0.93	1.036|0.816	0.024	1|1	0.976|0.813	1.14	1.124|1.163	0.001	1|1	0.905|0.856	0.68	0.685|0.674	0.000	1|1	0.450|0.345	1.34	1.185|1.503	0.051	1|1	0.832|0.548	1.16	1.313|1.011	0.046	1|1	0.669|0.992	Unigene431_17	MLSFISCMRTVLVRQQNVDILRILHTSALCEAARKGTREKARKKKVKVEVKKVGFIPHNQRDKKINLHRENLHFEDSWKQLPQDNVYVLKYYRWPVYTVAEAIQCHRETHHPSMYNVPNAPLNIDIELDMRAEKKNRFVDNFHRMAMIPHKFEHGEERKILVFTKGNDEISEAREAGGTLVGGIELIRDITNGELLLTDYQFVIAHPNILPELIALRGLMKRKFPNPRSETLGTNLVEMIKHFSNGISYTATKDEHQQDFGLISTSVGTLDMDTQKLEENLQSLLQDVDSVRPKREGERFIKRVLLKSPPSSERLKIDAYQYIPEFYVKTANKTSAKSNE	77.01	5e-140	gi|195108505|ref|XP_001998833.1|	GI24185 [Drosophila mojavensis]	31.28	2e-23	sp|Q99N96|RM01_MOUSE	39S ribosomal protein L1, mitochondrial OS=Mus musculus GN=Mrpl1 PE=1 SV=2	77.01	2e-139
291	Unigene32323_17	GJ11740 [Drosophila virilis]	46518.375517	0.195	5	19	-	0.97	0.881|1.055	0.015	19|19	0.118|0.623	0.83	0.820|0.841	0.000	19|19	0.002|0.064	1.09	1.073|1.098	0.000	19|18	0.586|0.174	0.9	0.920|0.874	0.001	18|16	0.082|0.004	0.92	0.873|0.972	0.005	18|18	0.017|0.773	0.88	0.951|0.817	0.009	18|16	0.330|0.001	Unigene32323_17	SLLAVVAGSWGSPGDGQYHIQTDEGPERYFRFQTDNGQFRKERRLQDGTVVGTEAWIDAAGFLRQKDYIADKDGYRILKSKTVFVGYNRHIEDAIKSTKSIPAQNGVLVNGVREHTNSVNAVETAKQVSGVYTTTTTPLPLIISEPIVPHDPASEAYDGKLNYLSPAEAANIQPTDKLGFDHYPDELPRLLQRQRVRIQKPIAAPYDTPASNSLTEYNQFAAQAQRDDSNSGAPPLPALEMQPPLLSRGATRQRLRPIAVYDTTPAPIAAAEAAGYSTPTPFAVATADESAPNTHGYYYQRSSTPATHMNAATTNALEVNQLEDGLLPPLLPATSRRQRPPAANSLSGPAVPYDGVGVTTNGFRYFLPHQYHEEEQFADEKRAGSFGYVDPFGIRRVVY…	55.00	5e-102	gi|195069077|ref|XP_001996946.1|	GH10097 [Drosophila grimshawi]	-	-	-	-	55.00	2e-101
292	Unigene14636_17	646 1104 minus strand coactosin-like protein [Glossina morsitans morsitans]	17524.587055	0.222	3	6	-	1.72	1.854|1.591	0.035	4|6	0.003|0.023	1.27	1.210|1.332	0.007	6|6	0.083|0.027	2.23	2.266|2.199	0.002	6|6	0.003|0.003	0.77	0.724|0.825	0.005	6|6	0.002|0.134	1.61	1.759|1.456	0.046	6|6	0.000|0.023	0.68	0.619|0.750	0.009	5|4	0.001|0.085	Unigene14636_17	EDEVEDQPRRMLLPTGLDKESIREAYEDVRSDQTDTDWAVFKFQNCTITCTARGQGFAEFREQFGENDRAFGYIRIQMGDEMSKRQKFVFLTWIGQYVGVLPRAKMSTDKALIREVLSNFAVELYAGVDDELDIELFRGALERAGGANYGTGV	75.16	2e-61	gi|21483504|gb|AAM52727.1|	LP08941p [Drosophila melanogaster]	42.34	2e-25	sp|B0BNA5|COTL1_RAT	Coactosin-like protein OS=Rattus norvegicus GN=Cotl1 PE=1 SV=1	75.82	1e-61
293	Unigene6428_17	47 679 minus strand EG:171D11.1 [Drosophila melanogaster]	23527.225402	0.327	4	8	-	1.15	1.185|1.123	0.002	7|8	0.056|0.213	1.19	1.256|1.114	0.010	7|6	0.040|0.424	1.28	1.323|1.240	0.003	7|8	0.005|0.168	0.84	0.784|0.888	0.005	6|8	0.013|0.029	1.28	1.160|1.393	0.027	8|7	0.552|0.002	0.98	1.027|0.930	0.005	8|8	0.884|0.501	Unigene6428_17	FGLVPVRQCLEKIPSDLIFNIFAVTWLITVKMSLIRLIGVECRLLAKRGYSSSPTTTKMFIDGKFVESQTNEWIDLHNPATNEVISRVPKCTQAEMQAALESNKKAFKSWSQQSVLSRQQVMFKLQTLVKSNMGELAKNITKEQGKTLADAEGDVLRGLQVVEHSCGIPSLAMGETVANVARDMDTYSLVLPLGVTAGIAPFNFPAMIPLW	75.83	2e-89	gi|2653397|emb|CAA15632.1|	EG:171D11.1 [Drosophila melanogaster]	85.00	3e-89	sp|Q7KW39|MMSA_DROME	Probable methylmalonate-semialdehyde dehydrogenase [acylating], mitochondrial OS=Drosophila melanogaster GN=CG17896 PE=2 SV=1	85.08	2e-88
294	Unigene11066_17	GF11091 [Drosophila ananassae]	34450.183666	0.095	2	5	-	0.87	0.872|0.876	0.000	5|4	0.545|0.419	0.9	0.854|0.947	0.004	4|5	0.398|0.843	0.93	0.878|0.974	0.005	5|5	0.299|0.876	0.94	0.904|0.985	0.003	4|5	0.553|0.950	0.99	1.010|0.970	0.001	4|4	0.971|0.934	1.02	1.028|1.005	0.000	5|3	0.919|0.992	Unigene11066_17	SLKLMVNVCGHTLCESCVDLLFLKGSGSCPECMVPLRRNNFRVQLFEDPMVEKEVDIRKRVLRDYNKKEEDFATLEEYNDYLEEIETIIYNLCNNIDIIGTNKRIEAYRRENRDVIQRNKTRMGREEYELEEMLEVERAQEEARKQELAELETEQKKKKAREKEALIDELMCSGKDASEIVNEFAEKAEKSREEEKKVPPPKPATQFSTGIKFGRTADQMFLPLPKAEEGPLYEHKVSTLYTEGPTPPSSADIESKGFITHIRPENSAERAGGYKANLACQRALQEALMGLYYGAT	75.00	5e-103	gi|195153513|ref|XP_002017670.1|	GL17185 [Drosophila persimilis]	49.49	3e-66	sp|P51950|MAT1_MARGL	CDK-activating kinase assembly factor MAT1 OS=Marthasterias glacialis PE=1 SV=1	75.00	2e-102
295	CL2482.Contig1_17	GF16081 [Drosophila ananassae]	93334.3509109996	0.435	25	374	-	2.17	2.275|2.067	0.022	370|366	0.001|0.001	2.04	1.962|2.109	0.011	364|364	0.001|0.001	2.44	2.497|2.379	0.007	367|368	0.001|0.001	0.89	0.867|0.904	0.001	362|343	0.001|0.001	2.24	2.300|2.184	0.007	368|365	0.000|0.000	0.93	0.899|0.961	0.002	362|368	0.001|0.014	CL2482.Contig1_17	MKLTIVLLALVGLVAAASVSSTDKVTVADHAFLEKQKFLFEIVYRVEDPLMFEEYIKMGHTLVTDKEHYTHFDQHMKKFYESYKIGALLPRGEFFGALVKTHHKQAFGLFNFFYYAKDWETFQTNVAWARIHVNEGMFVYALTLAVIHRDDFNGLMLPSIYEIFPQYFLNSKFIYEAEKFDYNTWSKYTQYEKELLEVHNRNHHYYNQDYFYIKDFKTYQWWRLMGLDEQWYAAEKSFPLRENTYEFISDDKYVSIMKNINMFWHPVDYTRDIEYNNEHSVLSYFTEDLGWNSYWYYLNMDYAFFLDGKTFGLNKDRRGELWLYNVEQILNRYYMERLSNGFGGIDGFSWNHAYEYGYNSQLISYNGVGFSSRSNYFERQSHGRYDMLNQIQSGLKRVY…	65.06	0.0	gi|194746586|ref|XP_001955758.1|	GF16081 [Drosophila ananassae]	63.89	0.0	sp|P11996|LSP1B_DROME	Larval serum protein 1 beta chain OS=Drosophila melanogaster GN=Lsp1beta PE=2 SV=3	65.06	0.0
296	Unigene14854_17	168 584 LEN=784_ minus strand_ translated	15456.70383	0.460	3	10	-	1.05	1.087|1.018	0.002	10|10	0.308|0.952	1.07	1.004|1.144	0.010	9|8	0.987|0.107	0.88	0.889|0.870	0.000	10|10	0.176|0.383	1.22	1.242|1.205	0.001	9|10	0.002|0.001	0.87	0.904|0.828	0.003	9|9	0.105|0.018	1	0.939|1.070	0.009	9|9	0.469|0.750	Unigene14854_17	MSAEVAGYPASIPATPPPTPADFKNDEPKIYISSAKLELKLSAVQSQAQNSKNYVWHTQVVQPVVEQEEVKEALMTETAAQKPMEAVNHNLYTPTKRHGEKPGSLTATLYDFMDVERYHSERNQLANKAVNNVRESTDV	-	-	-	-	-	-	-	-	-	-
297	Unigene15375_17	GG12386 [Drosophila erecta]	187411.568088999	0.007	1	2	-	0.98	1.117|0.840	0.038	2|2	0.844|0.707	0.9	0.999|0.806	0.019	2|2	0.998|0.720	0.85	0.933|0.776	0.012	2|2	0.921|0.539	1.16	1.106|1.222	0.007	2|2	0.848|0.496	0.81	0.770|0.857	0.004	2|2	0.528|0.795	0.97	0.940|1.008	0.002	2|2	0.917|0.992	Unigene15375_17	MAVKLTANTNNPPISGLATVHLISEFIDIEVVWGNETSLQFADKRRLLCHSNNDVLRALARVAPEYKLYGENAIERTQIDHWLSFSLTCEDDISWALSFLDKSIAPVTFLVGNKLTIADFALFNEMHARYEFLSTKGIPQHVQRWYNLINSLPLIQKVLEALPEEAIIAAKRSKRSYGVKLSEYESSYLPDKTKPSERKQEGKFIDLPGAELGKVVVRFPPEASGYLHIGHAKAALLNQYYALNFNGKLIMRFDDTNPAKETVEFEEVILGDVELLQIKPDIFTHTSNYFEIMLQYCKQMIKNGKAYVDDTPADKIKVEREQRIESVNRSNDVERNLSLWEEMVIGTDIGQKCCVRAKIDMSSANGCMRDPTIYRCKNEPHPRTGTKYKVYPTYDFACP…	62.54	0.0	gi|170063637|ref|XP_001867188.1|	bifunctional aminoacyl-tRNA synthetase [Culex quinquefasciatus]	67.21	0.0	sp|P28668|SYEP_DROME	Bifunctional glutamate/proline--tRNA ligase OS=Drosophila melanogaster GN=Aats-glupro PE=1 SV=2	62.54	0.0
298	Unigene15696_17	AGAP005714-PA [Anopheles gambiae str. PEST]	160671.237237999	0.019	2	2	-	1.28	1.322|1.247	0.003	2|2	0.510|0.604	1.23	1.452|1.004	0.100	2|2	0.309|0.995	1.72	1.888|1.545	0.059	2|2	0.261|0.237	0.76	0.810|0.715	0.005	2|2	0.574|0.338	1.6	1.223|1.975	0.283	2|2	0.671|0.074	0.95	1.114|0.791	0.052	2|2	0.857|0.735	Unigene15696_17	WLAIVALIGVSLARHEDCENAPYAEHSSVQVINEEDAVRAIYECEEGYELSGSRELICDVDTDLWDVEPPKCAKVELSNEVNAERAKKKKPQNIIEDTRISAEMAASLDMTCVQAKITAPDIRHGFVQKYDRRRKGEHVFLVALYACNDNFELEDAEITTLYCSQRKWVGDLPNCVALGEYTDADEEEYDEYETVDGEDGQDEEDGDDVAEESTDNRVAPPPPAPPVVAEAEEPEQEISNEIETAVQENTAQENESPAPTNAEPVVPVTDINIVVAPTQDPYTPRYLDDNCGADKGGCEQKCERLLFPGENEPRLKCSCFEGFSLDPNDYASCHDINECQLDNGGCEQLCNNLPGSYQCSCEQGLQIDTLTGNTCIDINECEQPEVAAQCEGGCENTHG…	38.54	0.0	gi|195017056|ref|XP_001984528.1|	GH14975 [Drosophila grimshawi]	29.35	6e-69	sp|Q61555|FBN2_MOUSE	Fibrillin-2 OS=Mus musculus GN=Fbn2 PE=1 SV=2	38.54	0.0
299	CL870.Contig2_17	305 625 Histone-lysine N-methyltransferase SETMAR [Acromyrmex echinatior]	12277.438988	0.075	1	1	CL870.Contig1_17	1.14	1.176|1.106	0.002	1|1	0.844|0.902	1.23	1.093|1.376	0.040	1|1	0.906|0.703	1.49	1.758|1.221	0.144	1|1	0.439|0.799	0.86	0.934|0.779	0.012	1|1	0.940|0.602	1.34	1.303|1.375	0.003	1|1	0.713|0.640	1.08	1.011|1.150	0.010	1|1	0.985|0.873	CL870.Contig2_17	MESNKQHFRHILLFNFRKGKNAVQARKKLTDVYGEGVLTVRQCQNWFAKFRSGNFDVEDAPRSGRPVEADKDAIKALVDANRRITTREIGERLNLSNSTVYGHLKGI	91.59	1e-50	gi|332018106|gb|EGI58720.1|	Histone-lysine N-methyltransferase SETMAR [Acromyrmex echinatior]	41.12	4e-19	sp|Q53H47|SETMR_HUMAN	Histone-lysine N-methyltransferase SETMAR OS=Homo sapiens GN=SETMAR PE=1 SV=1	91.59	6e-50
300	Unigene7524_17	GA18355 [Drosophila pseudoobscura pseudoobscura]	53590.723482	0.225	8	22	-	0.74	0.712|0.770	0.002	18|19	0.001|0.001	0.85	0.820|0.871	0.001	21|21	0.019|0.006	0.66	0.643|0.674	0.000	20|22	0.001|0.001	1.19	1.277|1.098	0.016	22|20	0.001|0.007	0.69	0.719|0.664	0.002	22|18	0.000|0.000	1.02	0.977|1.057	0.003	21|22	0.795|0.525	Unigene7524_17	RTRIFSTLVQSKAFINGNWINASSNQSFDVINPVDGSVVGSVPNMDVNDAFHAIKAAKNAFELSEWSKFTAKERSSLLKKWFYMIENNSNEISAIMCAESGKPINEARGEVAYGNAFIEWFAEEARRIYGDVIPSPARDREIIVLKQPLGVAALITPWNFPLAMITRKAGAALAAGCTIVIKPAEDTPLTALALVKLAEEAGFPDGVINIVTTNNAAPIGELFCKSPDVKGISFTGSTEVGKWLFRNSSDGIKRISLELGGNAPFIVFNTANLEKAVDAAVASKFRNCGQTCISANRFFLQHKIHDKFIDLLKQRVESLKVGDGSKPDVQIGPLINNMQYNKVSSYVEDARSKGAQILFGGNPVEKLGKLFYSPTIISNVPSNAKLYTEEVFGPVVSIV…	73.42	0.0	gi|198453803|ref|XP_001359345.2|	GA18355 [Drosophila pseudoobscura pseudoobscura]	51.54	9e-146	sp|P51650|SSDH_RAT	Succinate-semialdehyde dehydrogenase, mitochondrial OS=Rattus norvegicus GN=Aldh5a1 PE=1 SV=2	73.42	0.0
301	Unigene14820_17	43 810 ribosomal protein L8 [Glossina morsitans morsitans]	28020.287396	0.109	2	3	-	1.6	1.437|1.766	0.054	3|3	0.291|0.101	1.15	1.060|1.234	0.015	3|3	0.895|0.452	1.67	1.617|1.729	0.006	3|3	0.039|0.038	0.97	1.044|0.888	0.012	3|3	0.889|0.660	1.18	1.173|1.180	0.000	3|3	0.458|0.556	0.71	0.756|0.668	0.004	3|3	0.187|0.070	Unigene14820_17	MGRVIRAQRKGAGSVFKAHVKRRKGAAKLRPLDFSERNGYIRGVVKEIIHDPGRGAPLAVVHFRDPYRYKIRKELFIAPEGMHTGQFVYCGRKATLQIGNVMPLSVMPEGTIICNLEEKTGDRGRLARTSGNYATVIAHNPDTKKTRVKLPSGAKKVVPSANRAMVGIVAGGGRIDKPILKAGRAYHKYKVKRNSWPKVRGVAMNPVEHPHGGGNHQHIGKASTVKRGTSAGRKVGLIAARRTGRIRGGKGDTKDK	97.05	1e-130	gi|195439984|ref|XP_002067839.1|	GK12506 [Drosophila willistoni]	97.05	5e-131	sp|Q9V3G1|RL8_DROME	60S ribosomal protein L8 OS=Drosophila melanogaster GN=RpL8 PE=2 SV=1	98.73	6e-131
302	Unigene18220_17	GA18189 [Drosophila pseudoobscura pseudoobscura]	25049.444983	0.161	2	6	-	1.07	0.981|1.156	0.015	5|5	0.921|0.255	1.07	1.136|1.013	0.008	5|5	0.390|0.963	1.2	1.139|1.262	0.008	5|6	0.296|0.139	0.91	0.922|0.907	0.000	5|6	0.533|0.454	1.17	1.220|1.115	0.006	6|5	0.150|0.525	1.06	1.160|0.952	0.022	5|6	0.286|0.775	Unigene18220_17	KAHPTSINTLQIRGYAKSKDKKKEKGKKAGKVEINEAQLREVINFDAVNDNMQKAVQQMRDDFVKHLSLRSTSGAIDSLRVYIDGAEHELQELAQISRKNPKTIVVNMIAFPQTIPDVLKAIANSGMNLNPQQDGTTIFIPIPKVTKEHRENLSKNAKTLFIKYRDIIRDIQNNTIKKLKKQSDISKDDSFAIQTQVTAIADKYIAEADKLLGTKQKELIGES	81.25	2e-88	gi|195377904|ref|XP_002047727.1|	GJ11766 [Drosophila virilis]	41.36	2e-37	sp|Q96E11|RRFM_HUMAN	Ribosome-recycling factor, mitochondrial OS=Homo sapiens GN=MRRF PE=1 SV=1	81.25	6e-88
303	Unigene29873_17	GK16614 [Drosophila willistoni]	20711.388904	0.045	1	1	-	1.15	1.044|1.260	0.023	1|1	0.966|0.740	1.09	1.100|1.079	0.000	1|1	0.902|0.948	1.13	1.242|1.023	0.024	1|1	0.812|0.977	1.15	1.396|0.910	0.118	1|1	0.599|0.870	1.02	0.822|1.226	0.082	1|1	0.795|0.795	0.94	1.078|0.809	0.036	1|1	0.919|0.789	Unigene29873_17	MSRQASRFDTKKVNAEFLTLTYGALVTQMLRDFENIEDVNKQLERIGYNMGMRLIEDFLARTSAPRCLEMRETADRIQQAFRIYLNVQPTISNWSASSDEFSLVFETNPLTEFVELPQDLTNLRYSSILSGCIRGALEMVQLDVQCWFVQDQLKGDNVTELRIKFVRRLEDAIPAGED	91.01	2e-94	gi|195428922|ref|XP_002062514.1|	GK16614 [Drosophila willistoni]	61.11	1e-61	sp|Q5ZI57|TPPC3_CHICK	Trafficking protein particle complex subunit 3 OS=Gallus gallus GN=TRAPPC3 PE=2 SV=1	91.01	8e-94
304	CL885.Contig2_17	GE21399 [Drosophila yakuba]	16185.31011	0.044	1	6	-	0.5	0.357|0.635	0.039	6|6	0.042|0.010	0.99	0.966|1.008	0.001	6|6	0.881|0.974	0.53	0.376|0.679	0.046	5|6	0.023|0.031	0.83	0.901|0.766	0.009	6|6	0.669|0.104	1.15	1.144|1.157	0.000	5|5	0.239|0.344	1.73	1.697|1.771	0.003	6|6	0.023|0.001	CL885.Contig2_17	LPMLFWTEVREHFLELMHLMRLLNDKIAPLILLACSNNMYFICFQLFNSFQNIGVDLIAVTAFWYSLFFAIFRTILTLFMASSVNDYSKRILLTLRSVPSTSWCVEAQRFSEQLAFDLTAWSGCGFFFITRQLILAV	63.50	5e-47	gi|195491580|ref|XP_002093622.1|	GE21399 [Drosophila yakuba]	62.77	6e-47	sp|P83294|GR64B_DROME	Putative gustatory receptor 64b OS=Drosophila melanogaster GN=Gr64b PE=3 SV=1	63.50	2e-46
305	Unigene32700_17	GD11983 [Drosophila simulans]	39260.211686	0.198	5	33	-	1.14	1.108|1.166	0.002	33|29	0.018|0.001	1.14	1.079|1.197	0.007	33|32	0.336|0.009	1.13	1.105|1.147	0.001	29|32	0.040|0.010	1.01	1.032|0.996	0.001	32|30	0.740|0.945	1.12	1.148|1.094	0.001	33|32	0.009|0.146	1	0.984|1.023	0.001	33|33	0.910|0.790	Unigene32700_17	RKMSRLGISFLLIAFVLVVNTMPANAGVTHAHKHEKHNSKERLKDGIFAGRDAHHHENGEHNVEFDHEAIIGSLKEAKEFDKLTPEESKKRLLVLIQLMDLNKDGFVERHELKAWILRSFKKLGEEEAADRFEEIDADGDGKVTWKEYLKDTFAMENENEKKELIDFDSYDEEKEMIKSDKELFSAADLNKDGVLDSREYVLFYSPEEHPEMLPIVLEHTLREKDTNHNGEIDYAEYIGNTGQDRSREWLVEEKDRFDYLDENKDGLLTDNEVLNWVVPNSESIATDEVDHLFVSTDEDHDDRLSYLEILNNYDTFVGSEATDYGDHLQNINHFLDEL	68.24	2e-135	gi|195550883|ref|XP_002076126.1|	GD11983 [Drosophila simulans]	34.93	3e-42	sp|B5X186|CALUA_SALSA	Calumenin-A OS=Salmo salar GN=calua PE=2 SV=1	68.24	7e-135
306	CL638.Contig1_17	1276 2571 minus strand cysteine proteinase cathepsin F [Glossina morsitans morsitans]	49388.858844	0.100	3	10	CL638.Contig2_17	0.76	0.770|0.758	0.000	8|8	0.001|0.004	0.79	0.777|0.809	0.001	9|8	0.012|0.017	0.85	0.889|0.805	0.004	8|8	0.085|0.009	0.91	0.968|0.861	0.006	10|9	0.687|0.012	0.9	0.871|0.922	0.001	8|10	0.054|0.543	0.9	0.819|0.979	0.013	10|10	0.203|0.915	CL638.Contig1_17	RAKRNSNLVGGAKALDKKDAEQRLQASLDKLAAGDGPNYRISKVYSATTQVVSGTLTNIDVELYDENDEKKRCTVKIWAQPWLSNGYEVTIDCPNKELIKRRHSRSVEQLEKKTHKKRNHHSLDKTEHLFSKFQIKYNRRYHTAMEHQMRLRIFKQNLEIIKELNRNEMGSAKYGITEFADLTSTEYKQRTGLWQRSEDKPNKNAPAVIPNIALPKEFDWREKGVISKVKNQGMCGSCWAFSVTGNVEGLHAVKTGKLEEYSEQELLDCDTSDSACNGGLMDNAYEAIEHIGGLELESDYPYEGRKDQCKFNKSKVHVKVNGGIDLPKNETAIAQWLIANGPISIGINANAMQFYRGGVSHPWKALCSKKTLDHGVLIVGYGVSDYPMFKKTLPYWIVK…	76.27	0.0	gi|83944664|gb|ABC48936.1|	cathepsin F like protease [Glossina morsitans morsitans]	67.51	2e-179	sp|Q9VN93|CPR1_DROME	Putative cysteine proteinase CG12163 OS=Drosophila melanogaster GN=CG12163 PE=2 SV=2	76.50	0.0
307	Unigene21098_17	GK14067 [Drosophila willistoni]	12536.484748	0.104	1	3	-	0.79	0.762|0.826	0.002	3|3	0.222|0.380	1.63	1.750|1.512	0.028	3|3	0.095|0.109	0.83	0.850|0.816	0.001	3|3	0.482|0.349	0.95	1.014|0.892	0.007	3|3	0.967|0.493	1.69	1.442|1.947	0.128	3|3	0.301|0.078	2	2.178|1.812	0.067	3|3	0.024|0.196	Unigene21098_17	RPKNRLSLEHLKYLYSILEKNTTVSENNRGLLVESLRCIAEILIWGDQHDSSVFDFFLEKNMLSYFLHIMRQKSGGSSFVCVQLLQTLNILFENIRNETSLYYLLS	98.11	5e-55	gi|194744819|ref|XP_001954890.1|	GF16516 [Drosophila ananassae]	75.00	2e-38	sp|Q2KHT3|CL16A_HUMAN	Protein CLEC16A OS=Homo sapiens GN=CLEC16A PE=2 SV=2	98.11	2e-54
308	Unigene15796_17	GK10932 [Drosophila willistoni]	88443.5387269998	0.126	5	16	-	1.46	1.502|1.425	0.003	16|16	0.001|0.001	1.12	1.066|1.171	0.006	16|16	0.647|0.134	1.32	1.336|1.310	0.000	16|16	0.001|0.002	1.13	1.137|1.131	0.000	16|16	0.144|0.044	1	1.052|0.950	0.005	14|16	0.616|0.711	0.78	0.745|0.806	0.002	16|16	0.001|0.025	Unigene15796_17	KELLDVEEKENISNSPSTEEMQMNLQNELHSSVKDIPQIPIDMDNAANMQESFYLESTSTEARHQLQPFASDIEFTAADEPNLHTDETQITNREEHKPVILDPSFDTVRNSSPDTFECKAGTIFDTSPALNIFAPEFTPTQKSIGAPKSPSPVSTEEKHLIEETKEQVTLNETEEFKQKMDDLIISSNDGILSQVEEVAQTAANIVESLNPFAASEPEQHEMVEQTPIEADQAFSTFLTASQPDADFSLQNEQSYHNEQQEQQHSQEETAEFIFEHQEDNLLLTKPEDEQPPVVASPVKLESELNVFEEHIPASISVENTIAAPVEPEPVYLLIEPAHEETHLEMIESPIAEPEHENTHMEQAESGVAEPEYVAVSEPELKAAPETELHSVSEPELITQ…	34.45	4e-06	gi|195446100|ref|XP_002070627.1|	GK10932 [Drosophila willistoni]	-	-	-	-	-	-
309	Unigene7493_17	lark, isoform E [Drosophila melanogaster]	38867.1792980001	0.263	7	15	-	0.91	0.924|0.893	0.000	15|15	0.145|0.005	0.85	0.841|0.861	0.000	11|15	0.003|0.086	0.97	0.950|0.989	0.001	15|15	0.603|0.927	0.95	0.933|0.969	0.001	14|15	0.224|0.820	0.93	0.957|0.902	0.002	15|15	0.748|0.378	0.94	0.944|0.927	0.000	15|14	0.442|0.454	Unigene7493_17	MPGAGTFKLFIGNLDEKTQATELRPLFEKYGTVVECDVVKNYGFVHMETEQQGRDAIQNLNGYVLNDNAIKVEAAKSRRAPNTPTTKIFVGNLTDKTRAPEVRELFQKYGTVVECDIVRNYGFVHLDCIGDVQDVIKELNGRVVDGQPLKVQVSTSRVRPKPGMGDPEQCYRCGRSGHWSKECPRLYGGDRGLSAGGYRDRMYGRDPYPPPPPPPPFLRDRIMDGFRDYDYYDRRFEDTRDLFERRYQSSRMRDFPPPPLSRREPMPLPPPLSGSIRGSSLSRGYDSMFSRRSPPPRSSNGLSRYGYEDFSRDSFDDRMISSRGMRGPSPPGRRYAPY	90.62	1e-135	gi|125977312|ref|XP_001352689.1|	GA21193 [Drosophila pseudoobscura pseudoobscura]	88.92	1e-133	sp|Q94901|LARK_DROME	RNA-binding protein lark OS=Drosophila melanogaster GN=lark PE=1 SV=1	72.76	4e-106
310	CL1891.Contig1_17	CG10625, isoform J [Drosophila melanogaster]	73202.0894460001	0.484	15	93	-	1.3	1.399|1.194	0.021	87|90	0.001|0.001	0.9	0.931|0.863	0.002	88|81	0.033|0.004	1.17	1.138|1.208	0.002	85|89	0.006|0.001	1.07	0.955|1.184	0.026	81|83	0.259|0.001	0.83	0.847|0.810	0.001	85|84	0.000|0.000	0.74	0.766|0.714	0.001	87|83	0.001|0.001	CL1891.Contig1_17	PGPPGPPGPTRPGPPGPPGPTRPGPPGPPGPTRPGPPGPPGPQPPYKPTNPRESNKNTPGYLPPVSKTGKINQPFKSSSLVVEGEKPTTSTHTTTNTQTSFAPNYGSNNDYAQKKVTTTTTTYTTNTNTNTNTQFSNNIKTTPLTNIPPSSPPSPPKTITTTTTTNTNTNTNTNNANVPVNPPTSYQQNNKYLPPNRGPITNTFNRQDISIEKEQPYKTITTTTTTNTPTNTNTGNKYEYSVDKNTYQNQNQKTNTNTDRGTGQKITPGGGVQKVTTTTYEQTPGIYNGQKVTTQKETNIYGQIPGYPIGQKVVEKVTTTTTTNENVPSYPTGQRIVEKVTTTTNTNRNEGYKPSAPTVGQRFTNEFDKNRQTEKNVVTNTITNYQTPRPSYPSTEINN…	41.29	9e-43	gi|195126847|ref|XP_002007880.1|	GI13184 [Drosophila mojavensis]	-	-	-	-	41.29	3e-42
311	CL2210.Contig1_17	GK25196 [Drosophila willistoni]	22028.289035	0.320	6	37	-	0.94	0.953|0.932	0.000	34|36	0.166|0.193	1.11	1.119|1.101	0.000	36|36	0.002|0.036	1.53	1.627|1.431	0.019	35|35	0.001|0.001	0.63	0.658|0.593	0.002	36|36	0.001|0.001	1.78	1.683|1.886	0.021	36|36	0.000|0.000	1.17	1.165|1.184	0.000	36|35	0.001|0.001	CL2210.Contig1_17	MPKIQKPAPHFKGTAVVNGIFKDIDLIDYKGKYLVLFFYPLDFTFVCPTEIIAFSDRVSEFRNIGCEVVACSTDSHFTHLAWINTPRKQGGLGDLSIPLLADKSMKIARDYAVLDEETGIPFRGLFVIDRSQNLRQVTINDLPVGRSVDETLRLVQAFQFTDEHGEVCPANWKPGEKTMIADPKKSKEYFALAS	81.96	3e-96	gi|195447650|ref|XP_002071309.1|	GK25196 [Drosophila willistoni]	81.44	2e-95	sp|Q9V3P0|PRDX1_DROME	Peroxiredoxin 1 OS=Drosophila melanogaster GN=Jafrac1 PE=1 SV=1	81.96	8e-96
312	CL2261.Contig1_17	GF13443 [Drosophila ananassae]	83425.34896	0.123	8	41	-	0.84	0.818|0.852	0.001	41|39	0.001|0.001	0.81	0.844|0.774	0.002	38|39	0.001|0.001	0.81	0.784|0.843	0.002	38|39	0.001|0.001	1.01	1.024|1.001	0.000	40|39	0.672|0.971	0.78	0.765|0.796	0.000	35|40	0.000|0.000	0.94	0.980|0.899	0.003	41|40	0.638|0.001	CL2261.Contig1_17	MSEFAGTQSNLNQSQAFAAALQRAKQIAAKIQPNTAQPSGGGSSNAGISPPSVVGFKRNHDDSDSGPEAKRFTSPGNDYNNSNGSSVGGGGSNAGSTNISQALAQATAVAQRLAATAGTTVEEQIRIPESLVNSVLGRGSTETITQIQGESGCKVQLSQDQDRVITLRGSRETVTKGRELFQQLSNRNGGGNIEVVLTINMPPPGPTGFPPYQEIMIPGTKVGLVIGKGGDTIKQLQEKTGAKMVIIQDGPNQEIIKPLRISGDPQKIEHAKQAVLDLIAQKDLQAAALAARNNGGSVQGAGVGGSGGYNFGNTGEQCEVFVPKIAVGVVIGKGGDMIRKIQTECGCKLQFIQGKNDEPGDRRCLIQGTRQQVDDAKRMIDGLIENMMQRQQRNASGSS…	64.24	1e-141	gi|194756696|ref|XP_001960612.1|	GF13443 [Drosophila ananassae]	45.06	9e-27	sp|Q8UVD9|FUBP2_CHICK	Far upstream element-binding protein 2 OS=Gallus gallus GN=KHSRP PE=1 SV=1	64.24	4e-141
313	Unigene6992_17	GK10512 [Drosophila willistoni]	34496.575983	0.036	1	1	-	1.07	1.096|1.036	0.002	1|1	0.921|0.971	1.06	1.183|0.942	0.029	1|1	0.806|0.957	1.25	1.052|1.448	0.078	1|1	0.963|0.570	0.89	0.675|1.098	0.089	1|1	0.523|0.872	1.2	1.265|1.143	0.007	1|1	0.753|0.883	1.01	1.116|0.913	0.021	1|1	0.883|0.918	Unigene6992_17	MGQTLSEPVTAKESAYCQNELYRVGSSCMQGWRINMEDSHTHILSLPDDPGTSFFAVYDGHGGATVAQYAGKHLHKFILKRPEYKENIEKALKQAFLDIDYEMLYNESWGEQMAGSTAVVVLIKNNRLYCANAGDSRAIACINGEVETLSLDHKPNNEAETKRIHEGGGYVEFNRVNGNLALSRALGDFIFKRNANKKPEEQIVTAYPDVETREITSDWEFIVLACDGIWDVMSNKEVVDFCRKRIGMGMYPEEICEELMNHCLAPDCQMGGLGGDNMTVVLVCFLHNKPYEELIARCAKNN	86.14	6e-160	gi|195454859|ref|XP_002074440.1|	GK10512 [Drosophila willistoni]	61.79	6e-110	sp|P49596|PP2C2_CAEEL	Probable protein phosphatase 2C T23F11.1 OS=Caenorhabditis elegans GN=T23F11.1 PE=2 SV=2	86.14	2e-159
314	Unigene20847_17	1 330 LEN=330_ translated	11791.712583	0.081	1	1	-	0.72	0.674|0.761	0.004	1|1	0.568|0.673	0.46	0.627|0.284	0.059	1|1	0.412|0.117	1.53	1.118|1.932	0.331	1|1	0.913|0.282	0.49	0.340|0.643	0.046	1|1	0.082|0.284	0.89	0.874|0.901	0.000	1|1	0.883|0.911	0.66	0.881|0.439	0.098	1|1	0.863|0.220	Unigene20847_17	XEFGGEAFRTEKLDAIQWIICVALGLLSMPVGALIRLIPEEIFGGLKDWVNNNNAAPSNLPDFTSYPAASEPGRENSMPASVGSRTNSMNGSGSGVYPSRDGLVWNPAVAX	-	-	-	-	-	-	-	-	54.76	2e-07
315	CL2182.Contig1_17	GD14962 [Drosophila simulans]	21714.67675	0.085	1	1	-	1.07	1.048|1.084	0.001	1|1	0.964|0.921	1.77	1.253|2.294	0.542	1|1	0.730|0.228	0.85	0.811|0.897	0.004	1|1	0.809|0.895	1.25	1.230|1.278	0.001	1|1	0.733|0.602	1.41	1.829|0.988	0.354	1|1	0.312|0.992	1.61	1.179|2.042	0.372	1|1	0.828|0.237	CL2182.Contig1_17	MDLQHMENGISGGHGAVAGQTAGFSETDFQRLAQTIATSIQKILQNVSTMQRMVNQFNTPQDSPDLKKQLHQIMTYTHQLVSDTNNQLKEVDKCKERHLKIQRDRLVDEFTAALTAFQGVQRKTVDIEKNAVRQARAHSYNISKPPGTNSSSGSGSGSESSSSNVTTKDESADMVEVAKAASGQPHLSATSEQRATAEE	78.23	1e-61	gi|194752085|ref|XP_001958353.1|	GF10875 [Drosophila ananassae]	47.86	4e-19	sp|Q3ZBT5|STX7_BOVIN	Syntaxin-7 OS=Bos taurus GN=STX7 PE=2 SV=1	78.23	4e-61
316	Unigene6971_17	carbonic anhydrase 1 [Drosophila melanogaster]	30433.982869	0.280	4	14	-	0.97	0.959|0.971	0.000	12|13	0.603|0.891	0.69	0.754|0.628	0.008	13|14	0.001|0.001	0.9	0.848|0.946	0.005	14|14	0.220|0.809	1.18	1.089|1.264	0.015	13|13	0.182|0.001	0.58	0.581|0.584	0.000	10|14	0.000|0.000	0.66	0.728|0.598	0.008	13|14	0.001|0.001	Unigene6971_17	MSAHWGYTAENGPAHWAKQFPQASGHRQSPVDITPSSAKKGSELNAEPLKWKYVPEHTLSLTNPGYCWRVDVKGVDSELTGGPLGTDLYKLEQFHSHWGCTDDKGSEHTVDGISYAGELHLVHWNTTKYKTFAEAASAPDGLAVLGVFFEASDNAHPELEKITNLLPFIVHKGDRVTLPSACDPSKLLPTTKTYWTYEGSLTTPPCSESVIWIVFKTPIEVSRDQLDAMRNLNCYDVKDECPCNELNGKVINNFRPPLPLGNRVLREISGH	82.29	1e-132	gi|17737413|ref|NP_523561.1|	carbonic anhydrase 1 [Drosophila melanogaster]	49.25	5e-61	sp|Q92051|CAHZ_DANRE	Carbonic anhydrase OS=Danio rerio GN=cahz PE=1 SV=2	82.29	5e-132
317	Unigene15764_17	83 1852 AICAR transformylase [Glossina morsitans morsitans]	64444.0983780001	0.420	14	70	-	1.37	1.363|1.367	0.000	67|67	0.001|0.001	1.49	1.478|1.511	0.001	68|66	0.001|0.001	1.28	1.280|1.274	0.000	70|69	0.001|0.001	1.12	1.142|1.096	0.001	69|69	0.001|0.001	1.38	1.363|1.389	0.000	70|70	0.000|0.000	1.08	1.113|1.053	0.002	68|70	0.001|0.404	Unigene15764_17	MAAKHIALLSVSDKTGLIDLGQNLTALGFRLVASGGTATTLRNVGLAVDDVSHITGAPEMLGGRVKTLHPAVHAGILSRTTESDLADMKTQNFDLVSLVVCNLYPFESTISKPDVTVADAVENIDIGGVTLLRAAAKNHARVTVICESSDYAKVLSEIKEHGDTTLDTRKVLALKAFTHTASYDDAISDYFRKQYSSSVSQLNLRYGMNPHQKPAQLFTQLESLPLKVVNASPGFINLCDALNGWQLVRELKRALNLPAATSFKHVSPAGAAVGTLLSREQAKLCMVEDLYDSLTPLATAYARARGADRMSSFGDFVALSDVCDVVTARIISREVSDGIIAPGYEPAALEILKKKKNGAYCILQMDPDYEPNTLERKTIFGLTLEQKRNDAVIDASLFA…	84.07	0.0	gi|195453362|ref|XP_002073755.1|	GK12972 [Drosophila willistoni]	70.61	0.0	sp|Q5R5C2|PUR9_PONAB	Bifunctional purine biosynthesis protein PURH OS=Pongo abelii GN=ATIC PE=2 SV=1	85.25	0.0
318	CL2149.Contig1_17	149 1870 minus strand GH03249p [Drosophila melanogaster]	65327.5172060001	0.054	3	5	-	1.11	1.093|1.123	0.000	5|4	0.555|0.488	1.25	1.131|1.372	0.029	5|5	0.421|0.049	1.04	1.126|0.963	0.013	4|5	0.508|0.815	1.12	1.160|1.078	0.003	5|5	0.312|0.674	1.09	1.163|1.018	0.011	5|4	0.183|0.966	1.15	1.059|1.250	0.018	5|5	0.826|0.104	CL2149.Contig1_17	WKMRFKHFMGLHLCSLLVILLLASSPLVRADVEQDFADDVDDDGKVEEVQDENELDEIVYESPVYDQSKFYFADHFDDIAESRKRWIKSEAKKDDIAEEIAKYDGIWEWEPPQRIVSKKDIGLVLKSKAKHAAIASKLNKPFTFKGDTPLVVQYEVTMQEGQECGGSYIKLLSHGIHTEDLKKFNDKTPYTVMFGPDKCGSDIKLHFIFRHVNPINGSIEEKHCKKPKDRLEEPFKDKLPHLYQLVIRPDNTFEISVDHKVVNQGSLLSEFTPPVNPPREIDDPEDKKPKDWDEREKISDPTAKKPDDWDDDAPPQLPDPTAVMPDGWLEDEPSMIPDPTAVKPEDWDSEIDGEWEAPMIDNPACEQAVGCGEWKAPLIPNKEYKGKWRPPLIGNPNYQ…	73.16	9e-177	gi|27820096|gb|AAO25073.1|	GH03249p [Drosophila melanogaster]	56.21	8e-116	sp|P24643|CALX_CANFA	Calnexin OS=Canis familiaris GN=CANX PE=1 SV=3	73.16	3e-176
319	Unigene14329_17	GH13720 [Drosophila grimshawi]	44860.7805319999	0.180	5	22	-	1.04	0.974|1.114	0.010	21|20	0.749|0.009	1.13	1.113|1.151	0.001	22|22	0.040|0.050	1.17	1.122|1.209	0.004	22|22	0.112|0.001	0.88	0.881|0.869	0.000	22|22	0.020|0.042	1.27	1.258|1.276	0.000	22|22	0.002|0.006	1.1	1.143|1.050	0.004	22|22	0.006|0.677	Unigene14329_17	MEEDERGKLFVGGLSWETTQENLSRYFCRFGEIIDCVVMKNNESGRSRGFGFVTFADPANVNHVLQSGPHTLDGRTIDPKPCNPRTLQKPKKGGGYKVFLGGLPSNVTETDLRTFFGRYGKVTEVVIMYDQEKKKSRGFGFLSFEEESSVEHVTNERYINLNGKQVEIKKAEPRDGSGSQNANNSNVSGGYGKLGNECNHWGPHHAPINMMQGQNGQMGGPPLNMPIGAPNMMPGYQGWGTSPQQQGYGYGNSGPGSYQGWGAPPGPQGPPPQWSNYAAGPQQTQGYGGYDMYNSTSTGGPSGPSGGGSWNSWNIPPNSAGPTGAPGAAAGSATDMYSRAQTWGAGGPSTTGPVGGMPRTGPGNSASKSGSEYDYGGYGSGYDYDYSNYGKQDGGASNY…	95.51	4e-166	gi|195387610|ref|XP_002052487.1|	GJ21323 [Drosophila virilis]	94.09	4e-164	sp|P48809|RB27C_DROME	Heterogeneous nuclear ribonucleoprotein 27C OS=Drosophila melanogaster GN=Hrb27C PE=1 SV=2	95.51	2e-165
320	CL767.Contig3_17	GJ19924 [Drosophila virilis]	145855.466603	0.006	1	1	CL767.Contig2_17	1.12	1.107|1.131	0.000	1|1	0.908|0.887	1.26	1.271|1.252	0.000	1|1	0.709|0.793	1.13	1.278|0.974	0.046	1|1	0.767|0.971	1.04	1.196|0.879	0.050	1|1	0.788|0.820	1.24	1.045|1.444	0.080	1|1	0.963|0.591	1.11	1.147|1.074	0.003	1|1	0.852|0.927	CL767.Contig3_17	MEQFEQLLTCCVCLDRYRIPKLLPCQHSFCMEPCMEGLVDYVRRQVKCPECRAEHRIPYNGVQAFPTNVTLQRFLELHIEITGELPDPTSGQIMERCSVCSEKSYLSYCAHCEKKICEDCKSAHMDILRREITRFNSQIRRSLHRLQDTLAIIEKNSISLQTNCVGVTEEIDEIYKRITKAIKDRTDQLRGEVDRYLSIEMRNLTTLKENLDHEIQNISSNCDIVDKYMNETVEWDDCELMDTKEVFLKTVEFLRHFEYENTDYTRRVRFLVSIDPNQLVLNLATFGDLNITPHSLPSGSVSNSHLAPPSALQPGLMRSKSDHRLATQFRQQEERVGYNDEPVLGGRKFGERPVRANTDRYGDGNSRYGRGIDYDYENEYDNDQTSSRAGKSSRFRSRF…	81.96	0.0	gi|195384463|ref|XP_002050937.1|	GJ19924 [Drosophila virilis]	50.00	3e-79	sp|Q03601|NHL1_CAEEL	RING finger protein nhl-1 OS=Caenorhabditis elegans GN=nhl-1 PE=1 SV=2	81.96	0.0
321	Unigene6638_17	GL10457 [Drosophila persimilis]	133881.342515999	0.025	2	3	-	0.96	0.788|1.129	0.058	3|3	0.369|0.838	0.81	0.789|0.838	0.001	3|3	0.279|0.545	1.07	0.750|1.385	0.202	3|3	0.489|0.411	0.92	0.792|1.041	0.031	3|3	0.577|0.866	0.9	1.038|0.752	0.041	3|3	0.916|0.227	0.85	0.964|0.735	0.026	3|3	0.925|0.279	Unigene6638_17	DEQKAQMAASDGQIEESALNDLVQNTAKKVEVASEPQRSKVIIHKIEQEQREEQKAEQTEIEPKVILHAIQQGEPDLMVKQKSKNFYKQASNQPRQSNADKNVIVHKIVHPIKEYGNASQTQHNEAEKPTVTPKNVVCVSPKGMPDQNEDTKVIIHHIQLESTSPINYRVDSPDTDSSTSQLCRNKQTQLINKSIVQIQELSDESSSECNDNPPVISEAESETESMAGAYALDYSQAVRTLSSDSEESYEALRKPPAIPSQEQQDLKQRRAQKRVALETHFLPQLLSPRYLDSIIEENSDMSDARSDCSENPLMATYFGDDLHDASASKVRKANEVFPRSNLDFTRRHVKKQLGAMPKKPLPIREEPVAMVVAAKLIENAITAAQECCTRLSSEHTPES…	34.85	4e-36	gi|195151121|ref|XP_002016496.1|	GL10457 [Drosophila persimilis]	-	-	-	-	34.85	1e-35
322	CL1183.Contig1_17	GI15086 [Drosophila mojavensis]	28884.622399	0.057	1	3	-	0.85	0.849|0.851	0.000	3|3	0.545|0.470	0.88	0.852|0.905	0.001	3|3	0.550|0.777	0.79	0.807|0.768	0.001	3|3	0.333|0.218	1.08	1.114|1.039	0.003	3|3	0.622|0.874	0.82	0.820|0.811	0.000	3|3	0.328|0.412	1.02	0.980|1.052	0.003	3|3	0.963|0.873	CL1183.Contig1_17	PTRFLYKRSADADSAAVNADASEQVRTDGASDVNLLTFYKELSNVTDVEDLIERFVDKDSIDPQLGLQDTFRRSVERANLQTAKPAACMPESTVVPLIPLEPSKDPKIDYFPKCTRVKRCGGCCGSQLMSCQPVETETINFQVFPFEVVSGKQMRIRGKDIVVVEQHTKCKCDCRIKAEVGSRDCKQYQRYRADKCSCECTNDDALQKCLEQGHKYWDEAECRCVCRDSQSCTTGTIFDESQCACID	49.55	8e-50	gi|195130553|ref|XP_002009716.1|	GI15086 [Drosophila mojavensis]	27.10	3e-06	sp|C0K3N5|VEGFA_VIPAA	Vascular endothelial growth factor A OS=Vipera ammodytes ammodytes PE=2 SV=1	49.55	3e-49
323	Unigene7440_17	GF17610 [Drosophila ananassae]	48958.6672790001	0.019	1	1	-	0.73	0.643|0.815	0.015	1|1	0.484|0.778	0.84	0.889|0.791	0.005	1|1	0.868|0.762	0.99	0.866|1.116	0.031	1|1	0.881|0.895	0.73	0.728|0.734	0.000	1|1	0.527|0.473	1.14	1.089|1.190	0.005	1|1	0.930|0.837	1.15	1.332|0.960	0.069	1|1	0.645|0.967	Unigene7440_17	FSFGNPSQQQPAGFSFGAPAGQTVASTPAFGAAAAPTFGSSGATSTTTFGATGFGAATITQTPAFGATVNPTATIAPFGASASTPAPAFGATASVAPTFGTATPAFGATAVSSAAPSFNFGGMGGTAPTATAATSAAPGFSFGGLGGTVATNTATSAAPALGFSGLGGSLSFGKPAGTTSASLNFGTTTTSVATGGMWKPTATLTTATATPFVGLGGVDVSSTQPKAGDLKQDSVKIKETIVPDEIAKTVDALKSHIKGQKTLSSDIGRTSTSRLSNVSNEINNIQWALQEISNSVDTNYKQIKLLRKETSKTIQAVEMAQRTQDTPAGLQFENTAPFQFFLSLVAKYEQDLINFRQQIALTEHHMRSLTNPQTVSPDDLKRGFRQINESFISLAGRLH…	66.34	6e-110	gi|195395752|ref|XP_002056498.1|	GJ10977 [Drosophila virilis]	52.29	7e-108	sp|Q9VDV3|NUPL1_DROME	Probable nucleoporin Nup58 OS=Drosophila melanogaster GN=Nup58 PE=2 SV=1	66.34	2e-109
324	Unigene6979_17	GI22255 [Drosophila mojavensis]	42999.835332	0.012	1	1	-	1.04	0.897|1.186	0.042	1|1	0.901|0.828	0.9	0.884|0.908	0.000	1|1	0.860|0.923	1.27	1.109|1.427	0.051	1|1	0.921|0.590	0.82	0.833|0.816	0.000	1|1	0.784|0.685	1.07	1.083|1.063	0.000	1|1	0.936|0.950	0.86	0.969|0.753	0.023	1|1	0.965|0.679	Unigene6979_17	LTLCQTSVLKVYYAVIEDVIANVRDAFLDEGVDEQVLQEMKQNWRAKLMASKAVEINPEPPEPQPPPIVANNPKPSKAATAKAKKAAAAAAAAAAQQNSSNNATSSGTNSNAPNDVKPGITQLQSSVVNGVGGPTTSAAASNSAAMNGGFKQELGKSVSTLSGGLGNSLQKSNVIGSAQSGAGPVASSSGISGGGVGGSQQQSTNSTIPIVATLDPNRIMPVNITLPAQTGSMNTESRVLTIHVPASALQDNQLTQILTAHLISSIMSLPTTLASSVLQQHVNAALINSNMQKNFNASKQLDGAVDTSDEDESEESDDNMDNDDDDDLDKDDDEDAENDGGAEEEPLNSDDDVTDEDVSDVFETDNVIVCQYDKITRSRNKWKFYLKDGIMNIGGKDYV…	84.73	6e-64	gi|195503814|ref|XP_002098811.1|	GE23726 [Drosophila yakuba]	84.24	3e-63	sp|P52654|TF2AA_DROME	Transcription initiation factor IIA subunit 1 OS=Drosophila melanogaster GN=TfIIA-L PE=1 SV=2	84.73	2e-63
325	Unigene15549_17	GI18820 [Drosophila mojavensis]	18339.715598	0.162	2	6	-	0.91	0.885|0.926	0.001	5|6	0.350|0.480	0.94	0.986|0.888	0.005	6|6	0.967|0.362	0.97	0.951|0.988	0.001	5|6	0.752|0.937	0.93	0.943|0.912	0.000	6|6	0.596|0.213	0.99	0.951|1.029	0.003	6|5	0.684|0.919	0.99	1.036|0.953	0.003	6|6	0.870|0.729	Unigene15549_17	DGVYELQMPGFDAFDVYCLTRCLQEDQIDCCPWTVILRNENNGFGTMSNSCLEYKIGFGNANHDYFVGLDRLHRMTNLKRQTLLVGKSFQSGEYFFYDEFGIRSERNNYDVDTLGDSWGHKFGALFFLNSKKLRNLARSQCYFWPFKTIGHYNL	32.73	7e-12	gi|195122880|ref|XP_002005938.1|	GI18820 [Drosophila mojavensis]	28.92	1e-07	sp|Q92752|TENR_HUMAN	Tenascin-R OS=Homo sapiens GN=TNR PE=1 SV=3	32.73	3e-11
326	CL2637.Contig2_17	GD12529 [Drosophila simulans]	10455.402531	0.088	1	2	CL2637.Contig1_17	1.18	1.233|1.120	0.006	2|2	0.657|0.835	1	0.861|1.137	0.038	2|2	0.785|0.849	1.61	1.644|1.572	0.003	2|2	0.202|0.218	0.73	0.705|0.760	0.002	2|2	0.280|0.300	1.33	1.560|1.105	0.104	2|2	0.211|0.883	0.86	0.720|0.990	0.036	2|2	0.388|0.991	CL2637.Contig2_17	AGRFNSQTSNFYAAEIVSALEYLHSLQIVYRDLKPENLLINRDGHLKITDFGFAKKLRDRTWTLCGTPEYLAPEIIQSKGHNKAVDWWALG	96.70	3e-47	gi|85238|pir||F31751	protein kinase catalytic chain homolog DC2 - fruit fly (Drosophila sp.)	96.70	4e-48	sp|P16912|KDC2_DROME	Protein kinase DC2 OS=Drosophila melanogaster GN=Pka-C3 PE=2 SV=2	96.70	1e-46
327	CL2625.Contig1_17	GK15951 [Drosophila willistoni]	32402.117654	0.426	7	54	-	0.99	0.922|1.053	0.009	53|54	0.047|0.373	1.07	1.042|1.092	0.001	53|53	0.395|0.021	0.69	0.669|0.709	0.001	53|54	0.001|0.001	1.45	1.541|1.363	0.016	54|54	0.001|0.001	0.74	0.707|0.768	0.002	50|50	0.000|0.000	1.05	1.087|1.019	0.002	53|51	0.042|0.789	CL2625.Contig1_17	MIHIKCKDTDLESIPVKIGIIGGSGLDDPDILENRKETEVNTPFGSPSDVLIEGEIGGVKCVLLARHGRKHNIMPTNVNYRANIWAMRQVGCTHLIVSTACGSLREEIHPGDLVVPNDFIDRTTKRIQTFYDGGAESPRGVCHLSMLPSFSERVRSVLVATAKELDYSVHEKATIVTIEGPRFSSRSESNMFRQWGGDLINMTTCPEVVLAKEAGLLYGSVAIATDYDCWRMGCEGVNVQDVLKTFSANVVKVRHILMKAVQNIAKEDWTEDILDAKECVCENTMSGAM	82.70	2e-144	gi|195456804|ref|XP_002075295.1|	GK15951 [Drosophila willistoni]	81.66	3e-143	sp|Q291H4|MTAP_DROPS	S-methyl-5'-thioadenosine phosphorylase OS=Drosophila pseudoobscura pseudoobscura GN=GA18442 PE=3 SV=1	82.70	8e-144
328	Unigene6459_17	GH11693 [Drosophila grimshawi]	11811.941044	0.190	1	2	-	0.73	0.824|0.626	0.020	2|2	0.694|0.180	0.57	0.743|0.393	0.061	2|2	0.466|0.027	1.15	1.222|1.078	0.010	2|2	0.696|0.893	0.62	0.550|0.698	0.011	2|2	0.049|0.151	0.88	0.752|1.016	0.035	2|2	0.479|0.985	0.79	0.887|0.687	0.020	2|2	0.842|0.359	Unigene6459_17	ELLEQMEDYIPTVPDAMTARYLNQAGFETMDPRIVRIISVAAQKFISDIANDALQHCKTRTSSQHSGGHGSNKDKKPNKDRRYTLAIEDLTPALADHGITMRKPQ	78.30	3e-43	gi|195035837|ref|XP_001989378.1|	GH11693 [Drosophila grimshawi]	73.58	1e-41	sp|Q9U5W9|TAF10_DROME	Transcription initiation factor TFIID subunit 10 OS=Drosophila melanogaster GN=Taf10 PE=1 SV=2	78.30	1e-42
329	Unigene14303_17	GK19592 [Drosophila willistoni]	21898.341182	0.180	3	12	-	1.88	1.952|1.805	0.011	12|12	0.001|0.001	1.52	1.468|1.575	0.006	12|12	0.001|0.001	1.98	2.031|1.933	0.005	12|12	0.001|0.001	0.95	0.944|0.962	0.000	12|12	0.506|0.768	1.57	1.613|1.529	0.004	12|12	0.001|0.000	0.81	0.784|0.829	0.001	12|12	0.005|0.005	Unigene14303_17	VSPFKVLCDAERWIVVLQRLDGTVAFHNRTWTSYKQGFGSVGEKSEFFLGLQHLHELTYSGFFEVRIDLVDFQDVEKYAHYSDFSVFNEHADYKMGILGVYHGTAGDSFMYHEGQQFSAIDRDNDAKAQGSCSEEYNSAGWFKNCMEANLFGNYLHGNTDKFKEGMYWETFHGPVYSLKAVKMSVRAKC	42.56	5e-37	gi|195429304|ref|XP_002062703.1|	GK19592 [Drosophila willistoni]	41.80	3e-34	sp|Q15485|FCN2_HUMAN	Ficolin-2 OS=Homo sapiens GN=FCN2 PE=1 SV=2	42.56	2e-36
330	Unigene14408_17	253 717 minus strand troponin C 73F [Glossina morsitans morsitans]	17708.57818	0.639	4	42	-	0.84	0.848|0.824	0.000	39|39	0.001|0.001	0.95	0.969|0.924	0.001	41|41	0.489|0.046	0.87	0.874|0.869	0.000	40|40	0.001|0.001	0.98	0.960|1.000	0.001	39|39	0.230|0.988	0.97	0.938|0.999	0.002	41|41	0.027|0.994	1.08	1.096|1.057	0.001	39|42	0.002|0.386	Unigene14408_17	MSSVDEDLTPEQIAVLQKAFNSFDHQKTGSIPTEMVADILRLMGQPFDKKILVELIEEVDEDKSGRLEFEEFVQLAAKFIVEEDAEAMQKELREAFRLYDKQGNGFIPTTCLKEILKELDDQLTEAELDIMIEEIDSDGSGTVDFDEFMEMMTGE	98.06	3e-80	gi|24665772|ref|NP_524122.2|	troponin C at 73F [Drosophila melanogaster]	98.06	5e-81	sp|P47949|TNNC3_DROME	Troponin C, isoform 3 OS=Drosophila melanogaster GN=TpnC73F PE=2 SV=2	97.42	7e-80
331	Unigene15471_17	GK25430 [Drosophila willistoni]	21475.884926	0.435	5	43	-	0.94	0.876|1.002	0.008	43|43	0.066|0.990	0.91	0.871|0.946	0.003	41|43	0.001|0.321	0.79	0.752|0.830	0.003	41|43	0.001|0.001	1.16	1.231|1.080	0.011	39|39	0.001|0.046	0.79	0.764|0.812	0.001	40|39	0.000|0.000	0.97	1.017|0.918	0.005	40|42	0.874|0.169	Unigene15471_17	MSFVRKIFAKTSQRVQWAKTICNSSRCMSPVGSRDAPQIDVSQIIAKPEELERKQKLSGAITVPTKVDLSPINGVPEEHVKTRRVCIHLPPKHAMQSGTDNLDHWVIDFDNRERWENPLMGWTSTGDPLSNIEVRFGSKEEAIEHCERNGWRWFIGAEEKPKVERVKNYGLNFHWNRRTRTSTK	60.33	1e-62	gi|125983438|ref|XP_001355484.1|	GA11474 [Drosophila pseudoobscura pseudoobscura]	53.23	1e-35	sp|Q5XIF3|NDUS4_RAT	NADH dehydrogenase [ubiquinone] iron-sulfur protein 4, mitochondrial OS=Rattus norvegicus GN=Ndufs4 PE=1 SV=1	60.33	4e-62
332	Unigene14998_17	406 1113 LEN=1280_ translated	27731.825436	0.055	1	2	-	0.91	0.934|0.888	0.001	2|2	0.915|0.827	0.98	1.027|0.924	0.005	2|2	0.976|0.916	0.89	0.808|0.980	0.015	2|2	0.672|0.969	1.04	0.909|1.163	0.032	2|2	0.851|0.645	0.96	1.018|0.901	0.007	2|2	0.978|0.880	1.07	1.082|1.052	0.000	2|2	0.893|0.937	Unigene14998_17	EAMRVLKMSRQIINKYFIVLLLVIGLTSTHATTTTESPTEVARAARDQLVEAITADYLKLLDYELKESKELVEKVLDDDRFQNVRSEILLGKKIMLRDYVELVKEKSKKKQPSKEYKPSLFFYIFGKSLLYKDFIDIIARLEPTLSRYDCWIEEEFMSLGLETFIETLNQKRIKLIRGSVRRIDDYVNGLSPEQQRKAVAQKLYDWSVKMKEATEVPEKVDVLKDFLRDYYLETAV	-	-	-	-	-	-	-	-	-	-
333	Unigene14645_17	GK21115 [Drosophila willistoni]	83207.497939	0.401	20	158	-	1.24	1.278|1.202	0.003	154|151	0.001|0.001	1.02	1.011|1.031	0.000	153|157	0.745|0.313	1.47	1.505|1.432	0.003	154|156	0.001|0.001	0.86	0.854|0.869	0.000	153|153	0.001|0.001	1.17	1.195|1.139	0.002	151|150	0.000|0.000	0.83	0.810|0.840	0.000	152|157	0.001|0.001	Unigene14645_17	KNFHASVYVASKVALSKFDADVFLPYEKLTNTLSVVSVRLNRPLTLSEKILYSHLDDPKNQDIERGTSYLRLRPDRVAMQDATAQMALLQFISSGLKRVAVPSTVHCDHLIEAQTGGKEDLARAKDLNKEVYKFLASACAKYGLGFWKPGSGIIHQIILENYGFPGLLMIGTDSHTPNGGGLGGLCIGVGGADAVDVMADIPWELKCPKVIGVNLTGKISGWTSPKDIILKVADILTVKGGTGAIIEYHGNGVNSISCTGMATICNMGAEIGATTSVFPFNDRMAKYLKSTGRSSIADEANKYKTKLFAPDGNCEYDELIEINLDKLEPHVNGPFTPDLAHPISKLGANAKQNGYPLDIKVGLIGSCTNSSYEDMGRCANIAKDAMSHGLKSKIPFNVT…	89.61	0.0	gi|195443114|ref|XP_002069284.1|	GK21115 [Drosophila willistoni]	75.56	0.0	sp|P34455|ACON_CAEEL	Probable aconitate hydratase, mitochondrial OS=Caenorhabditis elegans GN=aco-2 PE=1 SV=2	89.61	0.0
334	Unigene6375_17	RE55124p [Drosophila melanogaster]	44641.096343	0.385	10	71	-	1.02	1.023|1.023	0.000	71|71	0.739|0.731	1.26	1.243|1.274	0.000	71|71	0.001|0.001	1.01	1.040|0.989	0.001	71|71	0.435|0.866	1.01	1.045|0.981	0.002	69|71	0.103|0.608	1.22	1.211|1.236	0.000	71|68	0.000|0.000	1.21	1.195|1.231	0.001	69|70	0.001|0.001	Unigene6375_17	MLKSVLISVFCFGVFLCGLSSAQFYFPNEYADVPNFGRCITPNRERALCIILDDCKYLFNLLLKTPLLDSDRLYLSRSQCGYQNGKVLICCPDRYRDVINVPSLQSTTTPPPVAPSNLLPQPGQCGNVLSNRIYGGNVTKIDEFPWMALIEYTKPTGNKGHHCGGSLITSRYVITASHCVNGPAIPKDWRLSGVRLGEWDTTTNPDCEIDVRGEKDCAPPYMDVAVEKAIPHPEYVPSSKNQINDLALLRLNRNVQYTDFIRPICLPTSTNLRTTTFDGIVMDVAGWGKTESESVSTLKLKAEVSGVPLSKCYDRYETENILLESSQMCAGGKAGVDSCRGDSGGPLISLDNTKKALSYYFLAGVVSFGPTPCGLDGWPGVYTRVGDFIDWIQGTIQ	71.75	7e-161	gi|24647107|ref|NP_524362.2|	easter, isoform A [Drosophila melanogaster]	71.75	9e-162	sp|P13582|EAST_DROME	Serine protease easter OS=Drosophila melanogaster GN=ea PE=1 SV=3	71.65	1e-159
335	Unigene2728_17	258 1740 LEN=1740_ translated	55079.335437	0.020	1	3	-	1.11	1.078|1.136	0.002	3|3	0.785|0.590	0.9	0.926|0.876	0.001	3|3	0.843|0.677	1.38	1.364|1.401	0.001	3|3	0.152|0.120	0.8	0.812|0.788	0.000	3|3	0.268|0.183	1.12	1.079|1.152	0.003	3|3	0.792|0.639	0.81	0.856|0.761	0.005	3|3	0.556|0.207	Unigene2728_17	IEWSKEDWAYFEAGQGEGGWFDSGNFTKYAIKQGLDYEGRNKKLGEIWEEIRYQDNMREALDNWAHEGKSTIWTTYWEEEAIEGRYSEVAKTMAEVVRDTMDEECSKDETEKALGNLPTVASLDGSIFTGCIADAWQACFENASKSVTGMNQLELQQRTLEWGCLTSIQEPPSSIANARVNTALELSAIRDISKIPQSDLVKQVSTEVPRAGGGFGGKEKGEEGAKTTVARIKRRADGLTARAKVMAEEIRGDPARIRAFLAFGYLNKKWTAAVARCLRKKGEGKVVTATRQEKLLLSERGLAPGKKKEIGRLGKLTGQMVDLWASKDVGPLMEKEFSKDSSRHLEEEIDVGADSERHTLSAIRCMALSGQMSALHSRSVCIFCFLKEAGIEGGENLFP…	-	-	-	-	-	-	-	-	-	-
336	CL1698.Contig2_17	GL18661 [Drosophila persimilis]	73448.1927180001	0.033	1	2	-	1.2	1.286|1.119	0.014	2|2	0.559|0.835	0.66	0.572|0.747	0.015	2|2	0.092|0.568	0.78	0.699|0.859	0.013	2|2	0.387|0.764	1.57	1.339|1.799	0.106	2|2	0.370|0.042	0.45	0.584|0.316	0.036	2|2	0.118|0.011	0.57	0.469|0.665	0.019	2|2	0.031|0.278	CL1698.Contig2_17	LLLVSVAQISPALAIVDAESCWNDSEACLIQATLHRVDEPPQSAGLAVQIDCQTKLQLSTAGENNRAPAYLLRPLESLLLDGCHAPLDVETYGMEYLPYCSTVPQVYMERFHADTLQPFDCPGGNNSAMEVEVLRYHNNELATVGTDAFSNLPHLRELYFVRNSLRHIARSAFDALRVVERIHIAYEPLLALKDGDLFEHTGVADLQLLQLKHITSDLFDHLPETLRQIVIARTLFDDDAVVVSNPQLLRNISINGCTLKSFTLLESAQTTSVRYINLSGNALDEFRVDFLSDGNSNTSIVAVETLDLSENELTQLPLLWLSALRKLRHLLLRGNRLKILSLAELMSALPALTSLDLRDNELTSLHEAAAATALSWEQVRIQIDRNPWNCLWLLDFAHT…	35.64	9e-80	gi|195148048|ref|XP_002014986.1|	GL18661 [Drosophila persimilis]	-	-	-	-	35.64	3e-79
337	CL319.Contig2_17	GD21289 [Drosophila simulans]	177433.587424999	0.009	1	1	CL319.Contig1_17	0.88	0.948|0.809	0.010	1|1	0.957|0.769	1.02	1.061|0.983	0.003	1|1	0.948|0.987	0.92	0.952|0.885	0.002	1|1	0.963|0.884	0.95	0.914|0.993	0.003	1|1	0.901|0.986	1.07	1.075|1.065	0.000	1|1	0.942|0.948	1.15	1.098|1.210	0.006	1|1	0.896|0.788	CL319.Contig2_17	QHVGVGATNGVLENGKDAPLSYLQLHTTLIRDQIGQGLGFSIAGGKGSPPFKDGCDGIFISRITEGGLAHRDGKIMVGDRVMAINGNDMTNACHDAAVQCLTEPQRFVRLVLQREYRGPLEAPLSPRSPAVLNSLSPSGYLANRPANFNRSIGDIISEQAQTNLQQAPIAAPVLAQQQQYPAQQQFNYTTQPAVYEINKTVTIPNATAATITAAAVGDNNAPKTNGCAATTVPYQQPQQQQIDKVTGQPVPAPRRANSIPFGDAPTEATSANGNAAQPPDSGNKPTGASTSGTNPAADASAETQEVVLPKNQGSLGFSIIGGTDHSCVPFGSHEPGIFISHVVPDGIAHKCGKLRMGDRILKVNDVDISRATHQEAVMELLKPGDDIKLTIQHDPLPPG…	65.71	0.0	gi|442621258|ref|NP_001262987.1|	scribbled, isoform S [Drosophila melanogaster]	72.66	1e-144	sp|Q7KRY7|LAP4_DROME	Protein lap4 OS=Drosophila melanogaster GN=scrib PE=1 SV=1	65.61	0.0
338	Unigene35119_17	GJ20553 [Drosophila virilis]	22746.780964	0.056	1	1	-	1.7	2.231|1.173	0.560	1|1	0.184|0.839	0.93	0.873|0.986	0.006	1|1	0.844|0.987	2.09	2.170|2.012	0.012	1|1	0.231|0.254	0.8	0.567|1.028	0.106	1|1	0.268|0.955	1.25	1.655|0.844	0.329	1|1	0.401|0.843	0.63	0.428|0.825	0.079	1|1	0.193|0.787	Unigene35119_17	LSDTSMNLEEEKYRIIMRYILGLIQKDRQVETLVEKLCLRFPVTREERQWRDIAYCLSLLSYNERAVKKLIDNAQHFKDKVQIDEVYQSFKLIMSNTSKLAKPELKAAVMELETRINECLEITVGKEREDKEGGGGDSSAGRRETRAKTKKDKKAGGSKQRASSRRRGKRDKSSSSESTSSSEDGAPSKRKQQQQQQ	81.97	1e-55	gi|195382143|ref|XP_002049790.1|	GJ20553 [Drosophila virilis]	45.38	3e-25	sp|Q9YHY6|CND1_XENLA	Condensin complex subunit 1 OS=Xenopus laevis GN=ncapd2 PE=1 SV=1	81.97	4e-55
339	Unigene32485_17	53 940 minus strand ubiquitin fusion degradation protein [Glossina morsitans morsitans]	33907.968292	0.044	1	6	-	0.93	0.866|0.990	0.008	6|6	0.395|0.963	0.99	0.983|0.996	0.000	6|6	0.956|0.987	1.17	1.165|1.181	0.000	6|6	0.129|0.180	0.77	0.773|0.760	0.000	5|6	0.045|0.036	1.28	1.244|1.314	0.002	5|5	0.061|0.057	1.05	1.103|0.997	0.006	6|6	0.447|0.992	Unigene32485_17	MFHFNGFNMEFLDNGRSFQETYKCFPVAMLPGNEREDLERGGKIIMPPSALDVLTRHNVEYPMLFKLTNRAQKRTTHAGVLEFVAEEGKCYLPLWMMQNLLLTEGCPVRIESVSLPVATFSKFQPQSTDFLDITNPKAVLENALRNFACLTTGDVIAIKYNKKVYELCVLETRPGNAVSIIECDMNVEFEAAIGYEPNKPKTEDPPVQEPQDHVMEEVVETFKGSGVRLDGKKKKDNQLDTPVIKRVLARGVPDYDYKFGYLKFDRSIKSINERIAKTDGEEGEPETFHGQGFSMK	72.20	7e-125	gi|195379542|ref|XP_002048537.1|	GJ11302 [Drosophila virilis]	69.01	7e-123	sp|Q9VTF9|UFD1_DROME	Ubiquitin fusion degradation protein 1 homolog OS=Drosophila melanogaster GN=Ufd1-like PE=2 SV=1	75.84	4e-128
340	Unigene15693_17	GK10770 [Drosophila willistoni]	59329.7451190001	0.245	9	22	-	1.04	0.996|1.082	0.004	20|21	0.966|0.095	1.05	1.026|1.072	0.001	22|22	0.799|0.370	0.95	0.917|0.974	0.002	22|22	0.261|0.760	1.12	1.104|1.136	0.001	22|22	0.020|0.014	0.95	1.002|0.902	0.005	21|22	0.981|0.044	1.02	1.038|1.006	0.001	20|22	0.688|0.970	Unigene15693_17	QAAFQSTVSAVRVENGNKLLDVEWQQALPYKSIPRVTSFQMFRGFLKGGEFADLSINEFILKCRERLGDIFRMPGVIGEPDTVVLFNVNDFEKVYRTEGIWPQRTGTEAVRYYLQNRKDDLLSETMGLNDNDEKWAKFRHVVNPVLMQPKNVKLYLEPLQKVNMEFIQRIREIRDPKTLEVPDNFITDINHLTFDSITMVALDHNFGLLRKDPESEKVQRLCEHVSAFLKSIYDLGIKPSYYKYLPSPTYRRFANSMDILVDVTKFYVNEALKRLEENPSKEGEERSVLEKLLKINRKTAIIMAMDMMIAGVDGPSSAISTVLLCIATNPEKQQKLREELFTAMPNKNDQPTFETMKQLPYLRACIKEALRLYPVIFGHARITGADIVLSGYQVPKGTG…	75.59	0.0	gi|404441535|gb|AFH54190.1|	cytochrome P450 [Bactrocera dorsalis]	50.00	2e-143	sp|Q9VVR9|C12C1_DROME	Probable cytochrome P450 12c1, mitochondrial OS=Drosophila melanogaster GN=Cyp12c1 PE=2 SV=2	49.91	2e-148
341	Unigene15134_17	GE19409 [Drosophila yakuba]	14598.633752	0.157	2	21	-	0.95	0.973|0.925	0.001	19|18	0.799|0.384	0.77	0.741|0.790	0.001	18|14	0.001|0.001	0.9	0.893|0.902	0.000	19|19	0.035|0.073	1.12	1.115|1.116	0.000	21|21	0.275|0.063	0.65	0.658|0.643	0.000	18|18	0.000|0.000	0.84	0.867|0.804	0.002	18|19	0.260|0.001	Unigene15134_17	MPRIVRKLISTANAPKLVAPYNQAVVANGMVYVSGCLGLNGETQQLVPGGVKEQAEVAFKHLAAILKDSGSSPYNIVKNTIFVKDLNDMDAINQVYKEAFCKNFSARSCVQVARLPLDALIEIESIALVGDVFT	63.43	7e-43	gi|195052623|ref|XP_001993336.1|	GH13123 [Drosophila grimshawi]	43.28	6e-29	sp|P52758|UK114_HUMAN	Ribonuclease UK114 OS=Homo sapiens GN=HRSP12 PE=1 SV=1	63.43	3e-42
342	CL2803.Contig2_17	GK20569 [Drosophila willistoni]	21814.921153	0.066	1	1	CL2803.Contig1_17	1.1	0.860|1.339	0.115	1|1	0.855|0.649	1.07	0.984|1.160	0.015	1|1	0.991|0.885	1.13	0.996|1.266	0.036	1|1	0.996|0.755	1.02	1.139|0.903	0.028	1|1	0.870|0.861	1.05	1.012|1.089	0.003	1|1	0.989|0.930	0.96	1.101|0.809	0.043	1|1	0.894|0.783	CL2803.Contig2_17	IKEGGLLETVQGHVSDVAYKVCISUECFCFTSSTKTSYVHLFIVILUVTDIGKRGWNNIGGSNVASNQYNPNGNNNSNDNSYQRSYSIGGDGDWDWGDSSSKPTLTQSNSYHQQLGEMNDNNWSGFDSSGYQSAYQQSKATEVGPVATSVKKNTNHQSCSQKLCEGFNSLDVKNVANKTTNNGKATEEDAAWDLLLN	37.05	2e-20	gi|195435828|ref|XP_002065881.1|	GK20569 [Drosophila willistoni]	-	-	-	-	37.05	6e-20
343	Unigene29563_17	GK11814 [Drosophila willistoni]	12657.985472	0.097	1	5	-	1.02	1.042|0.991	0.001	4|5	0.844|0.966	1.18	1.218|1.140	0.003	4|5	0.248|0.396	1.42	1.404|1.427	0.000	3|5	0.116|0.011	0.72	0.661|0.770	0.006	4|4	0.003|0.032	1.58	1.661|1.500	0.013	4|4	0.004|0.025	1.13	1.134|1.132	0.000	5|5	0.396|0.342	Unigene29563_17	PAVSSDDGVAGQESLTERETGFINQEHALKLLNAKELYCYGSRNFLLKNYSDAADQLSQACALYEELYGEQSNELGMPYLLYAKSLIALALDENKVIDVPDEEELDDDDNDDV	58.95	1e-23	gi|195444711|ref|XP_002069993.1|	GK11814 [Drosophila willistoni]	64.47	1e-22	sp|Q9I7K6|NASP_DROME	Protein NASP homolog OS=Drosophila melanogaster GN=CG8223 PE=1 SV=1	58.95	5e-23
344	Unigene15746_17	GD25545 [Drosophila simulans]	44598.237284	0.162	5	11	-	1.17	1.207|1.135	0.003	11|11	0.086|0.060	1	1.026|0.967	0.002	11|11	0.812|0.723	1.17	1.160|1.186	0.000	11|11	0.135|0.073	1.01	0.972|1.046	0.003	9|11	0.727|0.465	1.01	0.996|1.032	0.001	11|10	0.970|0.781	0.85	0.866|0.834	0.001	11|11	0.265|0.093	Unigene15746_17	MSEYWLISAPGDKTCQQTFDTMNNLTSKQNNLCNNYKFHIPDLKVGTLDQLVGLSDDLGKLDIYVEQITRKVAAYLGEVLEDQRDKLHENLLANNTDLSVYITRFQWDMAKYPIKQSLRNIADIISKQIGQIDADLKTKSTAYNSLKGNLQNLEKKQTGSLLTRNLADLVKKEHFILDSEYLTTLLVIVPKILANDWLANYEKITDMIVPRSSQMITQDNDYCLFNVTLFKKVVEEFKLHARERKFIVRDFVYNEEELAAGKNEMTKLITDKKKQFGPLVRWLKVNFSEAFCALVHVKALRVFVESVLRYGLPVNFQAILIEPNKKSVKRLRESLNQLYGHLDGASAGGQSNASIDNVDIPGLGFGQSEYYPYVFYKLNIDMVETAKI	90.98	0.0	gi|17137392|ref|NP_477266.1|	vacuolar H[+] ATPase 44kD C subunit, isoform A [Drosophila melanogaster]	80.57	0.0	sp|Q9U5N1|VATC_MANSE	V-type proton ATPase subunit C OS=Manduca sexta PE=2 SV=1	90.98	0.0
345	Unigene29947_17	GK22086 [Drosophila willistoni]	28375.576032	0.036	1	1	-	0.99	0.912|1.073	0.013	1|1	0.917|0.936	0.63	0.691|0.568	0.008	1|1	0.528|0.420	0.96	0.773|1.155	0.073	1|1	0.750|0.863	1.05	0.934|1.167	0.027	1|1	0.929|0.772	0.61	0.630|0.586	0.001	1|1	0.448|0.412	0.64	0.754|0.532	0.025	1|1	0.652|0.295	Unigene29947_17	WRWYCFSKKNPLQKLIDMLNEMSARFEQKYGPIPERVPFTMKEIEVPLQLRGFFNDAPRSLPRGLFLNDNQMLRSRTYFTLSSDPRAKFTGSTPDLSRSVPTTPIFRKFAQTKLRSDSLALERAPKLREERLTDDIVELRQTHGVLTPRFASAAPATATAAPTTTALSTIDNIDMPCDAGQLKAINVQTLTLGASRQVDTERPTLSTFRSTMPPQSQNANTTKTYNAPLRDADIINDRFSKRDNARVDEP	40.98	2e-15	gi|195124863|ref|XP_002006903.1|	GI18341 [Drosophila mojavensis]	-	-	-	-	40.98	7e-15
346	CL2324.Contig1_17	243 1883 26,29kDa proteinase [Sarcophaga peregrina]	62822.734429	0.384	15	94	-	0.99	1.033|0.947	0.004	93|93	0.570|0.096	1.08	1.098|1.063	0.001	94|93	0.001|0.035	1.14	1.157|1.122	0.001	92|94	0.001|0.001	0.86	0.851|0.871	0.000	94|91	0.001|0.001	1.25	1.240|1.252	0.000	93|91	0.000|0.000	1.07	1.056|1.093	0.001	94|94	0.113|0.010	CL2324.Contig1_17	VFLLLALCGLSAEVNATKPPKWDETYIAKGTLYIPYAEIAEPFYAWYDKLTKRSRIDYYGGMVKTYQLASVMPYGTSLKLAPVTTDEELNKVTCLQLNGTAENRVQIQTILPDAKNFTLLGTESFLGFTCDKFRLEEVIGEKRNVYTLWVRYKKSPHYPAARQPIPVRYEMRGYNTLLGSHFDHYFLDYDSYEHDDIPNEVFELDDSMACVPFPGPGAGHYATFNPMQEFVHPAKDEHVEHSFNHFKTKHGIKYKTDKEHEYRKNIYRQNLRFIHSKNRARLSYTLAANHLADKTEEELRARRGYKSSGVYNTGKPFPYSVDKLKDDLPDQYDWRLYGAVAPVKDQSVCGSCWSFGTIGHIEGAYFLKNGGNLVRLSQQALIDCSWQYGNNGCDGGEDF…	83.62	0.0	gi|4521167|dbj|BAA76272.1|	26,29kDa proteinase [Sarcophaga peregrina]	34.88	5e-79	sp|Q54TR1|CFAD_DICDI	Counting factor associated protein D OS=Dictyostelium discoideum GN=cfaD PE=1 SV=1	83.62	0.0
347	CL1287.Contig2_17	held out wings, isoform C [Drosophila melanogaster]	35202.2760839999	0.245	6	24	CL1287.Contig1_17	0.86	0.813|0.898	0.004	23|24	0.001|0.068	0.82	0.796|0.834	0.001	21|23	0.001|0.001	0.65	0.503|0.793	0.042	23|24	0.001|0.001	1.41	1.217|1.605	0.075	20|24	0.001|0.001	0.62	0.745|0.502	0.030	23|24	0.000|0.000	0.97	0.988|0.942	0.001	24|23	0.897|0.419	CL1287.Contig2_17	TPQQQHQSTQSIADYLAQLLKDRKQMAAFPNVFNHVERLLDEEIARVRASLFQINGVKKEPLTLPEPEGAPIQLNEKVYVPVREHPDFNFVGRILGPRGMTAKQLEQETGCKIMVRGKGSMRDKKKEDANRGKPNWEHLSDDLHVLITVEDTENRAKVKLAQAVAEVQKLLVPQAEGEDELKKRQLMELAIINGTYRDTSAKNAIPACEEEWRRVIAASAESRLLAPALPGLAPQIRAPQATTLGAPLILSQRMTVPTTAASILSGQAAPTAFENPAHGMIFAPYGDYANYAALAAGNPLLTEYTDHSVGRYLHAGSVF	88.00	2e-145	gi|195390287|ref|XP_002053800.1|	GJ23144 [Drosophila virilis]	86.82	2e-136	sp|O01367|HOW_DROME	Protein held out wings OS=Drosophila melanogaster GN=how PE=1 SV=1	88.00	9e-145
348	Unigene14529_17	GK21948 [Drosophila willistoni]	62366.1354860001	0.151	6	23	-	1.18	1.131|1.235	0.005	22|21	0.097|0.001	1.14	1.101|1.183	0.003	22|21	0.005|0.001	1.14	1.186|1.095	0.004	23|21	0.010|0.011	1.06	1.127|0.995	0.009	22|23	0.002|0.950	1.07	1.012|1.122	0.006	18|23	0.794|0.050	0.96	0.993|0.933	0.002	22|21	0.942|0.134	Unigene14529_17	MAGSLPLLSEEPAYQKLQQFYNAHGKDINMKELFARDTNRFKKYSLRLKTPNDGEILIDYSKNRITEDVWPLLLDLAKARKVTAARDAMFTGQPINITENRAVLHVALRNRGNEAILVDCNDVMPLVRAELSHMKEFTNQVISGVWRGCTGKQITDVVNIGIGGSDLGPLMVTEALKPYCKGLHSHFVSNIDGTHLAEVLKRVNYETTLFIVASKTFTTQETITNATSAKNWLLEHAKDPAAVAKHFVALSTNNEKVTAFGIDGKNMFGFWDWVGGRYSLWSAIGLSICLSIGFENFEQLLEGAHFLDNHFRTAPLEQNAPVILALLGIWYSNFFNAETHALLPYDQYLHRFAAYFQQGDMESNGKFVTKTDSKVVTYNTGPIVWGEPGTNGQHAFYQL…	82.26	0.0	gi|195430948|ref|XP_002063510.1|	GK21948 [Drosophila willistoni]	82.44	0.0	sp|P52031|G6PI_DROYA	Glucose-6-phosphate isomerase OS=Drosophila yakuba GN=Pgi PE=3 SV=1	82.26	0.0
349	Unigene30207_17	GL17980 [Drosophila persimilis]	26905.976105	0.064	1	1	-	1.23	0.983|1.480	0.124	1|1	0.982|0.507	1.12	1.110|1.127	0.000	1|1	0.889|0.906	1.32	1.133|1.506	0.070	1|1	0.899|0.524	0.94	1.001|0.873	0.008	1|1	0.998|0.808	1.19	1.119|1.261	0.010	1|1	0.906|0.759	0.92	1.112|0.735	0.071	1|1	0.886|0.640	Unigene30207_17	MSLLDVDSWSRECEACSILNQNIIKNLELRKKRQKSSLEYNRLTTAVQTELKQFEGEVKELNQKLKLLEGAHSIEPDELYRRKQQVEALQNQLAQVNRKVTQDTRGDRAELFAQPDSNILINRPASSDGSSFAAENVSDVNALKQNQIDILERQNRGLEVLSQTISRQRSLASQLGQEVENQNDILDNLADTMDRVDARVHVETGNIGDINRRDSTWGYWILIIILFVGIVIVAVI	43.89	3e-37	gi|125977118|ref|XP_001352592.1|	GA17964 [Drosophila pseudoobscura pseudoobscura]	-	-	-	-	43.89	1e-36
350	Unigene15775_17	CG3689, isoform C [Drosophila melanogaster]	26716.757131	0.206	4	8	-	0.83	0.916|0.751	0.014	7|7	0.510|0.024	0.88	1.015|0.751	0.035	7|6	0.961|0.029	0.92	1.014|0.823	0.018	7|8	0.967|0.081	0.89	0.878|0.909	0.000	7|7	0.096|0.481	1	0.896|1.107	0.022	6|7	0.231|0.658	1.11	1.079|1.131	0.001	7|7	0.551|0.535	Unigene15775_17	AQVSNKSGTGWPRRSSQGHVDGNINNGMQKYTAGQCLAINRTINLYPLTNYTFGTKEPLFEKDPSVPSRFQRMREEFDRIGMRRSVEGVLLVHEHGLPHVLLLQLGTTFFKLPGGELNAGEDEVEGLKRLLTETLGRQDGVKQDWIVEDTIGNWWRPNFEPPQYPYIPPHITKPKEHKRLFLVQLHEKALFAVPKNYKLVAAPLFELYDNSQGYGPIISSLPQALCRFNFIYM	92.77	2e-124	gi|116007798|ref|NP_001036597.1|	CG3689, isoform C [Drosophila melanogaster]	78.70	5e-102	sp|Q7T3C6|CPSF5_DANRE	Cleavage and polyadenylation specificity factor subunit 5 OS=Danio rerio GN=cpsf5 PE=2 SV=1	92.77	5e-124
351	CL683.Contig1_17	GL20789 [Drosophila persimilis]	66959.711902	0.202	8	18	-	1.08	1.062|1.099	0.001	16|17	0.097|0.025	1.13	1.115|1.149	0.001	18|18	0.056|0.089	1.42	1.402|1.428	0.000	16|14	0.001|0.001	0.8	0.810|0.780	0.000	17|18	0.001|0.001	1.43	1.412|1.452	0.001	17|17	0.000|0.000	1.01	1.046|0.983	0.002	17|18	0.459|0.917	CL683.Contig1_17	MAISFEKHRAQIVAAWNDVLDDKSSTNWSLYGYEGQTNELKVVGSGEGGVEELCEDLNSGKIMYAFVRIEDPKTGLKKFLLINWQGEGAPVLRKGTCANHIHDVAKLLSGAHLTINARNEDDIDVERLLKKLSAVSSTYSFKEPRGVQDEQKTPVGTNYTRVIPTKELNPSVMQDFWKKEEEEEKRRLAAEKEAKRQQLFKLEQEQRAREEKEHLEREKKVISTSKLQPAHVPIKTSPQPLSPEKTVASNFNVGITEAERMRQQRNQEARELIGSRVIAAKAIFTQNTSQGQLQSKLNTAPPAKPARTSIAQRINAFNQPQATEPEPRKPSPTPGKVALSKFEDIGAVNNTQQQQSQQQKEQQHQQQHQPAVHTTIQRAPSPATVTVHTSTLTSTQLAS…	82.12	5e-133	gi|195378382|ref|XP_002047963.1|	GJ11623 [Drosophila virilis]	80.18	4e-132	sp|Q9VU84|DBNL_DROME	Drebrin-like protein OS=Drosophila melanogaster GN=CG10083 PE=1 SV=1	82.12	2e-132
352	Unigene15462_17	GG18406 [Drosophila erecta]	10478.210316	0.216	2	19	-	0.77	0.769|0.779	0.000	19|19	0.001|0.001	0.76	0.788|0.735	0.001	19|19	0.001|0.001	0.79	0.758|0.826	0.002	18|19	0.001|0.002	0.96	0.955|0.961	0.000	19|18	0.593|0.475	0.78	0.769|0.792	0.000	14|19	0.000|0.000	0.97	0.996|0.944	0.001	19|19	0.965|0.503	Unigene15462_17	MFHPTRSLCTIVRRSYNQAAQDMSGIKPPKGPGNSAGVNTNVPGLSSKIVKPASGPLGPGASHTGEYKVPEYYSFNRFSYAEAEVEMAKYRLPQPSA	61.00	5e-23	gi|195479419|ref|XP_002100878.1|	GE15925 [Drosophila yakuba]	-	-	-	-	61.00	2e-22
353	Unigene15464_17	bendless gene	17236.008598	0.523	6	43	-	0.94	0.934|0.938	0.000	40|38	0.105|0.139	1.04	1.065|1.013	0.001	43|41	0.235|0.879	0.94	0.937|0.933	0.000	39|42	0.201|0.206	1	1.036|0.970	0.002	43|43	0.360|0.492	1.01	0.969|1.041	0.003	40|38	0.439|0.272	1.1	1.089|1.109	0.000	42|40	0.006|0.003	Unigene15464_17	MSSLPRRIIKETQRLMQEPVPGINAIPDENNARYFHVIVTGPNDSPFEGGVFKLELFLPEDYPMSAPKVRFITKIYHPNIDRLGRICLDVLKDKWSPALQIRTILLSIQALLSAPNPDDPLANDVAELWKVNEAEAIKNAREWTQKYAVED	100.00	1e-83	gi|312285484|gb|ADQ64432.1|	hypothetical protein [Bactrocera oleae]	99.34	4e-84	sp|P35128|UBE2N_DROME	Ubiquitin-conjugating enzyme E2 N OS=Drosophila melanogaster GN=ben PE=2 SV=1	100.00	5e-83
354	CL2259.Contig1_17	GJ18537 [Drosophila virilis]	33751.132504	0.023	1	1	-	1.34	1.493|1.177	0.050	1|1	0.551|0.835	2.69	2.247|3.131	0.391	1|1	0.191|0.130	0.79	0.917|0.663	0.032	1|1	0.934|0.522	1.76	1.914|1.611	0.046	1|1	0.217|0.244	1.54	1.593|1.487	0.006	1|1	0.443|0.559	2	1.548|2.460	0.416	1|1	0.442|0.163	CL2259.Contig1_17	HILKLSAELQKDFVDSFDVVMCDCDGVMWMVASPLPRTGEAVNLLRAHGKEVIFVSNNSMHTDDKYVEKFEGIGVKDFVKNDITHPVKSMLFYMKKHNIAQPVFSLCSVAANQMLRDAGIDVRTLVTNENVTTVNLEQVTRPEEKMGAVLFDINLDLTYAQIVAATRYLADKDCQFIAGGTDWLLPITGDLTVPGFCDYLDTIKRFTGREPIIVSKPALLLGDILEEVHELLDRKRCLFIGDSLTHDVRFGLNCGFQTLLVLSGSTPIGQMSKESAENLPHYYADSIADLIELFANIRK	47.67	8e-77	gi|195403095|ref|XP_002060130.1|	GJ18537 [Drosophila virilis]	31.08	2e-29	sp|Q00472|PNPP_SCHPO	4-nitrophenylphosphatase OS=Schizosaccharomyces pombe (strain 972 / ATCC 24843) GN=pho2 PE=2 SV=2	47.67	3e-76
355	Unigene15026_17	231 1109 minus strand enoyl-CoA hydratase [Glossina morsitans morsitans]	32015.497542	0.311	6	47	-	1.06	1.025|1.086	0.002	47|46	0.726|0.044	1.14	1.181|1.104	0.003	47|47	0.001|0.009	1.34	1.332|1.355	0.000	46|45	0.001|0.001	0.78	0.785|0.772	0.000	46|45	0.001|0.001	1.45	1.382|1.519	0.009	47|46	0.000|0.000	1.07	1.140|1.000	0.010	46|46	0.001|1.000	Unigene15026_17	MANIVKLLAGRAQHVLQVAAKQPQLTPRFFASATNLEFIKHEVTGEKKNVAVITLNRPKALNALCNGLMKELSQALDAYERDSNIAAIVITGSEKAFAAGADIKEMQTNTYSQCIMGNFLNDWSRVARCQKPIIAAVNGYALGGGCELAMMCDIIYAGEKAKFGQPEIALGTIPGAGGTQRLTRVVGKSKAMEICLTGNMISAVEAEKLGLVSKVLPADQLVNEAVKLGEKIGTHSGLIVQLCKEAVNTAYETTLQEGLKFERRTFHATFSTEDRKEGMTAFVEKRPANFTNN	85.27	2e-144	gi|195123627|ref|XP_002006305.1|	GI20973 [Drosophila mojavensis]	59.86	7e-99	sp|Q8BH95|ECHM_MOUSE	Enoyl-CoA hydratase, mitochondrial OS=Mus musculus GN=Echs1 PE=1 SV=1	83.62	2e-146
356	Unigene31320_17	GG15809 [Drosophila erecta]	11014.38687	0.274	1	1	-	0.75	1.143|0.347	0.317	1|1	0.878|0.087	0.84	0.891|0.785	0.006	1|1	0.870|0.777	0.82	1.024|0.606	0.087	1|1	0.984|0.414	0.83	0.491|1.161	0.224	1|1	0.194|0.788	1.14	1.472|0.799	0.226	1|1	0.545|0.769	1.8	0.856|2.737	1.769	1|1	0.837|0.158	Unigene31320_17	CETAAVALGRVEIYCPVLMMLPLESMEEIEFECKMKLAKALNLRRNLRGILYTQEMNEANLSPIEYGIEFGRFSGLLETGDFVITLEVCKEDEDD	58.33	2e-20	gi|194871978|ref|XP_001972942.1|	GG15809 [Drosophila erecta]	-	-	-	-	58.33	7e-20
357	Unigene6584_17	GH14468 [Drosophila grimshawi]	62132.8168560001	0.066	3	5	-	1.23	1.155|1.304	0.011	4|4	0.381|0.106	1.01	0.963|1.052	0.004	4|4	0.918|0.874	1.21	1.186|1.232	0.001	3|5	0.454|0.092	0.99	1.014|0.959	0.002	5|4	0.940|0.852	1.07	1.015|1.118	0.005	4|4	0.961|0.633	0.8	0.839|0.762	0.003	5|5	0.187|0.043	Unigene6584_17	PHIIFILADDLGFDDVSFHGSNEFLTPNIDALAYHGKILERLYTPGICTPSRGALMTGRYPIHTGTQHYVISNEEPWSLPTNITLMPEIFQKVGYSTNLVGKWHLGFAKREYTPTYRGFDNHYGYWGGFIDYYQRRSQMPLPHYSMGYDFYRNLELECADRGVYMTDLLTSEAERIILANNNTKPLLLLLSHLAVHIGNANEPLQAPKEEIEKFSYIKDPNRRKYAAMVSRLDQSIGSVISALEEANMLKNSIVIFQSDNGGPSVGLFANSASNWPFKGQKNTAWEGGVRVAGAIWSPLIPQRRSLFRPTMYMGDWLPTLAAAANIPLNQTALHLDGLNLWPALGDPTNNVNYENIDREIVHYLDDVWPVAALQQGEWKYVNGTTAAGRYNNVLTYREL…	59.67	0.0	gi|386771363|ref|NP_730304.2|	CG32191 [Drosophila melanogaster]	35.74	5e-72	sp|Q5FYB0|ARSJ_HUMAN	Arylsulfatase J OS=Homo sapiens GN=ARSJ PE=2 SV=1	59.67	0.0
358	Unigene26020_17	140 1384 LEN=1527_ translated	46447.1799560001	0.034	1	1	-	1.02	0.810|1.224	0.086	1|1	0.786|0.781	1.01	0.923|1.104	0.016	1|1	0.918|0.927	1.1	0.892|1.299	0.083	1|1	0.910|0.720	0.97	0.984|0.946	0.001	1|1	0.986|0.924	1.03	1.086|0.976	0.006	1|1	0.932|0.981	0.97	1.081|0.857	0.025	1|1	0.918|0.850	Unigene26020_17	MEASNVLKEYLEVFKDNNKQLKLLVAPNAVVDWFGRTVRGPAKIHDFLRFDVATQYLHVDFDEAEECPPIEQRPSHYKTKSLLSDDTDFILPINKVAGIATLKSYADSDIEDDDLGVRPLPAAGNCTPEHHSNTKADIGELTPPSSTIKIEDANLSDSERNLDEAECASAPKRFKASIPTPFSYMRRMSASSSKTIHVSKRQLTSTKSDKQMFCEDTSSDEELDLHLRQKLANEYTPLNYIEAVGKLDANPQILTTTDSLPTPQSSRDGDRPVRIRISYRRNNLDHSLQIALIIYEHLQNTSADVNQDAPSTMGMSRRNLMEQFNETALNAQDVHDVESITVGEADTTVSSAHEDEESTTTRGVQSRTPTKNEYTPPATPKRKPRVSYTSSGMKRLSPS…	-	-	-	-	-	-	-	-	-	-
359	Unigene7266_17	GJ13994 [Drosophila virilis]	14488.583565	0.488	5	18	-	1.03	1.057|0.993	0.002	17|18	0.241|0.965	1.04	1.121|0.952	0.014	18|18	0.036|0.656	1.05	1.024|1.072	0.001	17|18	0.749|0.542	0.98	0.933|1.030	0.005	18|18	0.216|0.559	1.04	1.033|1.056	0.000	18|15	0.800|0.244	1.01	1.023|0.994	0.000	18|17	0.658|0.954	Unigene7266_17	MDKSSAALVKKLQSELEAYQNLQKTCVKLVKQRTLLESQLNENKCVLDELNLLGPDNKVFKLYGPVLVKQDLEESRQNVGKRIEYISKELKSSSDTLENMEKDMTKHRETVQKLQQQYQVAAAMK	85.60	1e-56	gi|195427563|ref|XP_002061846.1|	GK16968 [Drosophila willistoni]	82.40	2e-55	sp|Q9VW56|PFD6_DROME	Probable prefoldin subunit 6 OS=Drosophila melanogaster GN=CG7770 PE=2 SV=1	85.60	5e-56
360	Unigene34203_17	GK13056 [Drosophila willistoni]	22352.522715	0.365	3	15	-	0.93	0.955|0.904	0.001	14|15	0.683|0.396	0.9	0.906|0.901	0.000	15|15	0.174|0.522	0.89	0.904|0.878	0.000	14|15	0.114|0.220	1.05	1.045|1.053	0.000	15|15	0.574|0.272	0.87	0.885|0.861	0.000	15|15	0.298|0.010	0.97	0.927|1.013	0.004	14|15	0.090|0.946	Unigene34203_17	LLLLSLVYMAHAADSDITKFMKHLEVIPDLITEGPKEFLKVNYDSGVVADKGVELTPTQVKHQPNVEWNPESADAYYTLIMTDPDAPSRAKPEIREWHHWLVVNIPGNALDKGEVLSEYVGSGAPKDTGLHRYVFLLYKQPKKLEFSEIHLKNTSAKGREKFSTKNFAEKYRLGVPVAGNFFQAQYDDYVPELHKQL	62.94	2e-68	gi|195453026|ref|XP_002073605.1|	GK13056 [Drosophila willistoni]	56.67	7e-51	sp|O16264|PEBPH_CAEEL	Phosphatidylethanolamine-binding protein homolog F40A3.3 OS=Caenorhabditis elegans GN=F40A3.3 PE=2 SV=1	62.94	6e-68
361	Unigene30392_17	GE16093 [Drosophila yakuba]	69450.1742070001	0.018	1	1	-	0.89	0.863|0.918	0.002	1|1	0.848|0.916	0.87	1.038|0.706	0.055	1|1	0.974|0.645	0.93	0.928|0.935	0.000	1|1	0.940|0.937	0.96	0.988|0.934	0.001	1|1	0.987|0.908	0.92	0.738|1.105	0.067	1|1	0.658|0.913	0.97	1.162|0.778	0.074	1|1	0.841|0.726	Unigene30392_17	LLLALVCLLFAFTWAQERNVILETFDFLRRGQIDANLENYDNNVQMDNEYDFIVVGAGTAGCAIAARLSENPKWKVLLLEAGGPESLIMDVPIVAHFLQLGEMNWKYRTQPSDRACLAMNNNRCNWPRGKVMGGSSVLNYMMYTRGNRRDYDRWAELGNVGWGWHDVLPYFKKYEGSNVPDADEDLVGRNGPVKVSYVNWRSKIAEAFLEAVQQDGLEHRDYNGHIQNGVNYLHTTTRNSTRWSSNRAYLYPLKGKRRNLHVKKFALVTKVLIDPTTKTTYGIIVRTDGHEHKILARREVIVSAGAINTPQLLMLSGVGPAKHLREVGIKPIVDLAVGYNLQDHTAPAVTFTTNATSLHFEDFADPTLVNRFNRQEGPYGSPGGCEAMAFWDLDHPQLK…	84.71	0.0	gi|195432691|ref|XP_002064350.1|	GK19745 [Drosophila willistoni]	39.58	2e-101	sp|P18172|DHGL_DROPS	Glucose dehydrogenase [acceptor] OS=Drosophila pseudoobscura pseudoobscura GN=Gld PE=3 SV=4	84.71	0.0
362	CL3031.Contig1_17	139 486 cyclin-dependent protein kinase CDC28 regulatory subunit CKS1 [Glossina morsitans morsitans]	13332.586318	0.086	1	1	-	0.93	0.794|1.064	0.036	1|1	0.762|0.941	1.21	1.292|1.137	0.012	1|1	0.694|0.905	0.8	0.666|0.932	0.035	1|1	0.593|0.934	1.21	1.210|1.217	0.000	1|1	0.789|0.697	1.04	0.949|1.130	0.016	1|1	0.961|0.892	1.25	1.461|1.040	0.089	1|1	0.513|0.971	CL3031.Contig1_17	MPADQIQYSEKYFDAIYEYRHVILPPDLIRLVPKPHLMSETEWRNLGVQQSPGWVHYMIHAPEPHVILFRRPRTDIPESGTNSNTNNSVAISNINNEQRAAQQNQMNANNNVSVHG	71.74	6e-35	gi|108879113|gb|EAT43338.1|	AAEL005232-PA [Aedes aegypti]	74.29	3e-26	sp|Q25330|CKS1_LEIME	Cyclin-dependent kinases regulatory subunit OS=Leishmania mexicana PE=3 SV=1	82.76	9e-37
363	Unigene15519_17	GG22562 [Drosophila erecta]	31927.765943	0.432	9	44	-	1.11	1.138|1.089	0.001	42|44	0.006|0.115	1.19	1.212|1.164	0.001	44|44	0.003|0.011	1.12	1.057|1.173	0.007	44|44	0.455|0.010	1.03	0.939|1.118	0.016	42|43	0.048|0.001	1.16	1.216|1.100	0.007	43|44	0.000|0.228	1	0.993|0.998	0.000	42|41	0.943|0.986	Unigene15519_17	VMLRNFTRLANPTLFNTLRNRGFASAESGKDILVERLDGERKGVTVITLNRPQAKNSFSRSLVTAFENVIDELAHDNSSRCVILRSSSPGVFCAGADLKERKTMSQDEAGAFLSSLRGLMIALEQLPMPSIAALDGYALGGGLEMALACDIRTAAEDSKVGLVETRLAIIPGAGGTQRLPRILSPALAKELIFTARVLSGKEAKDLGIVNHALPQNEAGDVAYQKALEIAEEIIPNGPVGVRMAKLAIDKGIQVDLNTGYSIEEICYSQVLPTKDRLEGLQAFEEKRKPVYKGE	71.72	6e-113	gi|194883570|ref|XP_001975874.1|	GG22562 [Drosophila erecta]	57.25	3e-79	sp|Q13825|AUHM_HUMAN	Methylglutaconyl-CoA hydratase, mitochondrial OS=Homo sapiens GN=AUH PE=1 SV=1	71.72	2e-112
364	Unigene33473_17	GI16827 [Drosophila mojavensis]	106183.386359999	0.011	1	39	-	0.42	0.416|0.423	0.000	39|37	0.001|0.001	0.48	0.512|0.452	0.002	38|36	0.001|0.001	0.54	0.551|0.520	0.000	37|37	0.001|0.001	0.8	0.852|0.753	0.005	39|39	0.001|0.001	0.62	0.569|0.661	0.004	38|38	0.000|0.000	1.17	1.163|1.185	0.000	37|39	0.001|0.011	Unigene33473_17	TLVVCLALLNLPLGTHSQDDSLAGSFLSGLLDTITSTADSKDCPGVCVHTLATLICYEVLDDIPCPSPSMKCCIESAQGKNVTLAHTSTTTTTTTTTTTSTTKRPTTTTTKVTTTTTVKPKTTSKRPTTTTTTTTTTKKTTTTKKPTTTSTLAPRKGAEKDADNADGAKVQNCTGVCVANRIAEYCEAYLTTKGLCASGTKCCVSLNDYANAKLPKDIYVPAKHMTNLSNMQHKNKTSTTIKQTTTKTTPSAATTTSTISTTAEPARTKISSNVNANKPVKHKKAPSTTTTTEDPADPTDPAEEQEVEDEDAEMQDDANDKDENPNGQTLKECEGECMNGIFAIFCDDIDSEAFCPGEGSCCVTGVASEATPALQATKVTPTKPATKIAKPQQRPAAKP…	78.01	3e-125	gi|195135513|ref|XP_002012177.1|	GI16827 [Drosophila mojavensis]	36.25	4e-21	sp|Q7RTZ1|OVCH2_HUMAN	Ovochymase-2 OS=Homo sapiens GN=OVCH2 PE=1 SV=2	78.01	1e-124
365	Unigene14783_17	GI22126 [Drosophila mojavensis]	25046.966924	0.053	1	1	-	0.77	0.857|0.691	0.014	1|1	0.840|0.540	0.85	0.907|0.790	0.007	1|1	0.901|0.766	0.86	0.994|0.724	0.036	1|1	0.993|0.636	0.9	0.954|0.853	0.005	1|1	0.948|0.767	0.94	0.836|1.047	0.022	1|1	0.816|0.965	1.09	1.033|1.140	0.006	1|1	0.964|0.859	Unigene14783_17	MFRFIVLSTLLAIAAGQGYNQNPKTAAIISEQRYLAGDGKFGAAYTQEDGINFKEETDSDGTRHGSYSYVDPTGERRTISYTAGKNGFQASGDHLPVPPPAPPQPVPQAGYAPQPQYQPPAQSGGYRSNDYDDGSYDPRYNDPGFGQQQGRYQAPQPQYQPPAAPAYNPPPQQPAYNPPAPQYNSYQPQPQQQPYYQPTTPNPHRFAPPGKLSLNRTPDGFSYSFNKV	72.53	1e-61	gi|195113205|ref|XP_002001158.1|	GI22126 [Drosophila mojavensis]	32.29	3e-06	sp|P27779|CUP7_DROME	Pupal cuticle protein Edg-78E OS=Drosophila melanogaster GN=Edg78E PE=1 SV=1	72.53	4e-61
366	CL949.Contig6_17	GH23433 [Drosophila grimshawi]	95975.8944809997	0.039	3	4	CL949.Contig2_17	1.07	1.045|1.101	0.002	4|4	0.840|0.669	0.93	0.912|0.944	0.001	4|4	0.721|0.885	1	1.010|0.998	0.000	4|4	0.974|0.993	1.08	1.123|1.030	0.004	4|4	0.789|0.873	0.87	0.856|0.880	0.000	4|4	0.330|0.578	0.83	0.809|0.843	0.001	3|4	0.346|0.321	CL949.Contig6_17	STCGTEQFRCNNGFCIPKRWRCDQESDCADGSDETTSLCMNFCTPTEVKCKNAEQCIPRSWVCDGSPDCRDQSDEADCNETCRSDEFTCGNGRCIQKRWVCDQDDDCGDGSDERDCPPKTCNPSTEFSCRDGGCVAKRWVCDGEPDCVDGSDEQQSCDKNATHVITPCLSHEYQCRDRITCLHHSWLCDGEKDCPHGDDELQENCRNNTCRPDQFQCGDRSCIAGHLTCNGEADCADRSDEQMCGISKITKCNASAHFDCGGGQCIPLSKVCDRKKDCPDGEDEPAGKCSVNECAVNNGGCMHKCVDQPIGYHCECNSGYKLTETNKTCVDINECEDPGACSQICINEVGGFKCECEVGYMRDPRNHTRCKATEGHASLLLARRHDIRKIALDHMEITS…	70.26	0.0	gi|195054555|ref|XP_001994190.1|	GH23433 [Drosophila grimshawi]	42.24	2e-174	sp|P35953|VLDLR_RABIT	Very low-density lipoprotein receptor OS=Oryctolagus cuniculus GN=VLDLR PE=2 SV=1	70.26	0.0
367	Unigene14485_17	GI19031 [Drosophila mojavensis]	11840.017929	0.318	3	13	-	0.85	0.964|0.745	0.024	11|12	0.748|0.001	1.04	1.106|0.974	0.009	13|13	0.274|0.864	1.02	1.072|0.958	0.006	12|12	0.338|0.685	0.86	0.795|0.924	0.008	11|12	0.001|0.115	1.24	1.259|1.226	0.001	12|12	0.002|0.010	1.16	1.025|1.298	0.037	13|12	0.950|0.036	Unigene14485_17	MFVVRRSAARLYPSGMQLAKMGSSQLGDLGSGAGKGGGGGGSIREAGGAFGKMEAAREEEYFYKKQKEQIERLKNDQIHQAEFHAQQIKEHEEAIQRHKAFLENIKK	86.92	4e-21	gi|24659341|ref|NP_652302.1|	CG13551, isoform A [Drosophila melanogaster]	-	-	-	-	86.92	2e-20
368	Unigene29794_17	GE16237 [Drosophila yakuba]	52895.8301930001	0.086	3	5	-	1.15	1.150|1.149	0.000	3|5	0.568|0.445	0.99	0.969|1.020	0.001	3|5	0.956|0.948	1.26	1.291|1.228	0.002	5|5	0.098|0.094	0.91	0.934|0.890	0.001	3|5	0.800|0.314	1.04	1.083|0.994	0.004	5|4	0.543|0.989	0.89	0.898|0.872	0.000	4|5	0.638|0.300	Unigene29794_17	IPELTQVRHNVKRGDYATLEGKDIALFESIVGKNHLVQEDLQGYNVDFLRSVRGDSQLVLRPSSTQEVSAILKYCNERKLAVCPQGGNTGLVGGSVPVCDEIVLSLARLDNILHIDEITGIAACEAGCILENLDMKARELGLVVPLDLGAKSSCHIGGNVSTNAGGLRVLRYGNLHGSVLGVEAVLANGDVLDLMSDFKKDNTGYHLKHLFIGSEGTLGVVTKVSMLCAPQPQAQHVAFLGLPSFDDVLKTFRNSRQFLGEILSSCEMVDAASLDASVNHFKLNSPIVGYPFYMLIETSGSNAEHDMEKFNRFLENGMEKGEIIDGTITGEVGKMQEIWKLRELVPVALVEDGFCFKYDISLPLREFYHIVEVMQERVGNLATRVCGYGHLGDSNLHLN…	73.47	0.0	gi|195477785|ref|XP_002100306.1|	GE16237 [Drosophila yakuba]	53.72	5e-148	sp|Q8N465|D2HDH_HUMAN	D-2-hydroxyglutarate dehydrogenase, mitochondrial OS=Homo sapiens GN=D2HGDH PE=1 SV=3	73.47	0.0
369	Unigene15708_17	AGAP011050-PA [Anopheles gambiae str. PEST]	3796.041092	0.351	1	7	-	1.16	1.163|1.151	0.000	7|7	0.085|0.148	1.62	1.483|1.761	0.039	7|7	0.001|0.001	1.65	1.828|1.474	0.063	6|7	0.001|0.009	0.71	0.767|0.658	0.006	7|6	0.036|0.001	2.11	2.132|2.095	0.001	7|7	0.000|0.000	1.4	1.269|1.537	0.036	7|6	0.027|0.001	Unigene15708_17	SVPDVVLNNGEKIPILGLGTWGSPKGEVVQAVKDAID	78.38	2e-09	gi|118777462|ref|XP_308086.3|	AGAP011050-PA [Anopheles gambiae str. PEST]	69.70	1e-06	sp|P15121|ALDR_HUMAN	Aldose reductase OS=Homo sapiens GN=AKR1B1 PE=1 SV=3	78.38	1e-08
370	Unigene6147_17	GJ24224 [Drosophila virilis]	31146.939039	0.060	1	2	-	1.41	1.350|1.478	0.008	2|2	0.469|0.281	0.92	0.921|0.924	0.000	2|2	0.892|0.916	1.12	1.117|1.129	0.000	2|2	0.861|0.820	1.28	1.350|1.203	0.011	2|2	0.357|0.542	0.74	0.704|0.771	0.002	2|2	0.334|0.589	0.66	0.709|0.608	0.005	2|2	0.356|0.164	Unigene6147_17	AAAPPAATAAPTPIQANGAELPRVNGAPSPNAANIPRIFENIGVGNTGSNNFPGGLPSISTTAGPPSFPALPLAPPFMIPPPFPFIAPYAVPPPPMPSDLSTLSDEELKLLEGNERRSVEERIKLLRNIELMINAAGILMNNYQIITARLQPPVPLPTETVASSNNTTNSTVTNDGPSTSAAAVAALAESQSNASGVGKVASIATPKILTESSTHRRLQNHDNVTIEDIGGEEHEYGVTQSGNAAPVSASVSVHTPGIEICTNDKTTSITAEQPENAELSELRKRRLKFLEDISKLST	37.06	8e-15	gi|195452546|ref|XP_002073401.1|	GK13173 [Drosophila willistoni]	35.86	6e-14	sp|Q95SP2|HRD1_DROME	E3 ubiquitin-protein ligase HRD1 OS=Drosophila melanogaster GN=sip3 PE=1 SV=1	37.06	3e-14
371	Unigene29675_17	GJ19270 [Drosophila virilis]	106882.68088	0.014	1	1	-	0.69	0.758|0.625	0.009	1|1	0.690|0.414	0.67	0.733|0.611	0.007	1|1	0.607|0.467	0.74	0.728|0.747	0.000	1|1	0.674|0.677	0.93	0.833|1.028	0.019	1|1	0.761|0.955	0.72	0.745|0.703	0.001	1|1	0.675|0.606	0.96	0.942|0.983	0.001	1|1	0.939|0.985	Unigene29675_17	EREREHHRTGSRSPTKITKIRIHQDVKRQKSPPRMHHTMMSREKIIIQTRTRERTPSPTVERRHEHKIRHEELVRERERRDRERDRAEREAARDKERAEALARCQERQRERERLAREKLRREEEEKKYGGVGVERGERLLPRPAERELAIAASRGYNSRERSLEDIERARHMSKRDLDVYEREREYMEAERRNLINREDIRRDREYMPTRRRDLSPVGEHYSARLRDPHEVYPDESRERVYNRAYIEDGHHGREREAPWPREMRERELHDIRDVREPRDTRDPRDFRDMDSELIYPDERERLIRNRERVREEWKGDWDVGREQEWNDTPPITGRGGFIGGPKRNTTLIGGAPNPGPSKIASREQRAPSEPDWDSVEVQKTTGANINKIEPSLIRDGSSF…	41.58	2e-60	gi|194892761|ref|XP_001977725.1|	GG18086 [Drosophila erecta]	-	-	-	-	41.58	5e-60
372	Unigene15023_17	GE26270 [Drosophila yakuba]	12137.109956	0.607	5	21	-	1.21	1.234|1.189	0.001	20|19	0.001|0.001	1.32	1.264|1.375	0.006	21|21	0.001|0.003	1.44	1.437|1.436	0.000	21|21	0.001|0.001	0.86	0.830|0.880	0.001	21|21	0.001|0.014	1.54	1.655|1.421	0.027	21|21	0.000|0.000	1.08	1.029|1.139	0.006	20|21	0.842|0.195	Unigene15023_17	MVKETGYYDLLGVKPDATSEELKKAYRKLALKYHPDKNPNEGERFKAISQAYEVLSDREKRQIYDDGGEAAIKKGGADTSDFRSPMDFFEKFFGAGFGGGGRRRERR	88.51	4e-31	gi|195500785|ref|XP_002097523.1|	GE26270 [Drosophila yakuba]	78.16	9e-22	sp|Q5NVI9|DNJA1_PONAB	DnaJ homolog subfamily A member 1 OS=Pongo abelii GN=DNAJA1 PE=2 SV=1	88.51	2e-30
373	CL1749.Contig1_17	GE17252 [Drosophila yakuba]	66896.2799060001	0.137	6	13	CL1749.Contig2_17	1.23	1.192|1.263	0.003	13|13	0.126|0.012	1.05	1.095|1.004	0.004	13|12	0.074|0.972	1.1	1.017|1.173	0.012	13|13	0.928|0.126	1.15	1.132|1.168	0.001	12|13	0.008|0.031	0.95	0.958|0.943	0.000	13|13	0.661|0.295	0.87	0.924|0.806	0.007	13|13	0.397|0.031	CL1749.Contig1_17	PVASVVYRTQKQTQKTKGKMTEQLRFDGRVAVVTGAGSGLGREYALLFGSRGAKVVVNDLGGSFHGEGASKRAADIVVDEIRAQGGTAVADYNSVVDGSKVIETAINNFGRVDILVNNAGILRDRSIAKISDQDWDLIHAVHLKGSFKCTQAAWPYMRKQNYGRIIMTSSNSGICGNFGQANYSAAKMGLVGLANTVAIEGQKNNIHCNVIIPTAASRMTEDILPDILFNELKPHLIAPVVVYLCHEFCKDNGSYIESAAGWATKLNIVRGKGCVLRTSLDQKVTTPEYVRSVWANITDMTDAKHLDGIGQASSYLLEVLEKLKEGKFDGFQDTFQYNNKDLILYALGIGSSVKNENDLKFLYENHPEFSAIPTYFVLPGLMLSMTTNLISSALPSGNA…	75.13	0.0	gi|195403137|ref|XP_002060151.1|	GJ18503 [Drosophila virilis]	75.00	0.0	sp|Q9VXJ0|DHB4_DROME	Peroxisomal multifunctional enzyme type 2 OS=Drosophila melanogaster GN=Mfe2 PE=1 SV=1	75.13	0.0
374	CL853.Contig1_17	GK15853 [Drosophila willistoni]	109655.52984	0.148	11	26	CL853.Contig2_17	2.64	2.766|2.517	0.031	26|24	0.001|0.001	1.52	1.537|1.507	0.000	23|24	0.001|0.001	3.35	3.294|3.412	0.007	25|25	0.001|0.001	0.79	0.715|0.860	0.011	26|25	0.001|0.016	1.84	1.973|1.716	0.033	26|25	0.000|0.000	0.58	0.591|0.564	0.000	26|25	0.001|0.001	CL853.Contig1_17	MEDGHAKTVEQALNFFGTDPERGLTLEQVKANQKKYGPNELPTEEGKTIWQLVLEQFDDLLVKILLLAAIISFVLALFEEHEDTFTAFVEPLVILLILIANAVVGVWQERNAESAIEALKEYEPEMGKVVRQDKSGIQKIRAKEIVPGDIVEVSVGDKIPADIRLTHIYSTTLRIDQSILTGESVSVIKHTDPIPDPRAVNQDKKNILFSGTNVAAGKARGVVIGTGLNTAIGKIRTEMSETEEIKTPLQQKLDEFGEQLSKVISIICVAVWAINIGHFNDPAHGGSWIKGAIYYFKIAVALAVAAIPEGLPAVITTCLALGTRRMAKKNAIVRSLPSVETLGCTSVICSDKTGTLTTNQMSVSRMFIFEKVEGNDSSFLEFELTGSTYEPLGELFLGG…	94.97	0.0	gi|195431523|ref|XP_002063787.1|	GK15853 [Drosophila willistoni]	94.26	0.0	sp|P22700|ATC1_DROME	Calcium-transporting ATPase sarcoplasmic/endoplasmic reticulum type OS=Drosophila melanogaster GN=Ca-P60A PE=1 SV=2	94.97	0.0
375	CL1310.Contig1_17	412 1956 adaptor protein CED-6 [Glossina morsitans morsitans]	56274.9183360002	0.017	1	1	-	0.85	0.797|0.912	0.007	1|1	0.748|0.911	1.1	0.978|1.228	0.031	1|1	0.983|0.813	0.82	0.810|0.828	0.000	1|1	0.809|0.811	1.05	1.113|0.982	0.009	1|1	0.880|0.967	1.05	1.101|0.990	0.006	1|1	0.920|0.994	1.25	1.178|1.327	0.011	1|1	0.828|0.672	CL1310.Contig1_17	MSQLMFWNKQNNSNNIKNQSNETNKNDKNGATEDAKKDKRNWLHTPDALVNGHVVYLVKFFGNLPVEQAKGIEVVKDAIRKLQFAQEMKKAETGTQEKCKKVEITISVDGVAVQEPRTQKILHQFPLHNISYCADEKGVKKFFSFIAKTVKPLDDGINGTTAGSSNGVSSSNGSNSTGGSNTEETHECFVFISNKLASDITLTIGQAFDLAYKKYINSVEKTDLGKAQQQNAELEKALGIYKSRLCELSLKLPKSELESMLFKMGIKDILDLPEVENGALTNGNTTKANMLEDKLLIDTNSTHSMKSSSGSSSSFVPIVPPRNNLPSQIIHKSNSQKMEELLLNSDSDSDFDPRADECVDGGSSSSSGGGKNISNDLFGFEPAKSYGQQLFTNQNNNIN…	64.25	2e-104	gi|195475040|ref|XP_002089794.1|	GE22280 [Drosophila yakuba]	63.98	2e-103	sp|Q7JUY7|CED6_DROME	PTB domain-containing adapter protein ced-6 OS=Drosophila melanogaster GN=ced-6 PE=1 SV=1	65.38	3e-112
376	Unigene15401_17	GJ21900 [Drosophila virilis]	17399.552174	0.635	8	104	-	1.32	1.345|1.288	0.002	99|94	0.001|0.001	1.37	1.339|1.399	0.002	101|101	0.001|0.001	1.61	1.678|1.541	0.009	100|95	0.001|0.001	0.79	0.774|0.796	0.000	101|100	0.001|0.001	1.71	1.740|1.674	0.002	101|103	0.000|0.000	1.04	0.998|1.090	0.004	98|95	0.985|0.004	Unigene15401_17	MASGVTVSDVCKTTYEEIKKDKKHRYVIFYIRDEKQIDVETVGDRNAEYDQFLEDIQKCGTGECRYGLFDFEYMHQCQGTSESSKKQKLFLMSWCPDTAKVKKKMLYSSSFDALKKSLVGVQKYIQATDLSEASREAVEEKLRATDRQ	98.64	6e-82	gi|195028448|ref|XP_001987088.1|	GH20162 [Drosophila grimshawi]	98.65	2e-81	sp|P45594|CADF_DROME	Cofilin/actin-depolymerizing factor homolog OS=Drosophila melanogaster GN=tsr PE=2 SV=1	98.64	3e-81
377	Unigene17327_17	rotamase [Aedes aegypti]	16802.462379	0.255	3	14	-	1.1	1.188|1.005	0.017	14|13	0.003|0.981	1.1	1.120|1.075	0.001	14|13	0.039|0.323	1.38	1.393|1.373	0.000	12|14	0.001|0.001	0.79	0.684|0.904	0.024	12|13	0.001|0.541	1.4	1.464|1.326	0.010	14|12	0.000|0.014	0.96	0.915|1.008	0.004	13|11	0.045|0.930	Unigene17327_17	EGWEVRKSRSTGLTYYLNIYTKESQWDLPSEPAKKESSGPSEVRCSHLLVKHKGSRRPSSWREENITRSKEEARAILEEYRKQMESGDTTLAALATKYSDCSSAKRGGDLGPFGKGQMQKAFEDAAFSLKVGQMSKIVDTDSGLHIILR	75.17	1e-60	gi|157124569|ref|XP_001654110.1|	rotamase [Aedes aegypti]	68.59	3e-55	sp|P54353|DOD_DROME	Putative peptidyl-prolyl cis-trans isomerase dodo OS=Drosophila melanogaster GN=dod PE=2 SV=3	75.17	5e-60
378	Unigene16199_17	1 302 LEN=302_ minus strand_ translated	11490.054671	0.317	1	1	-	1.13	1.450|0.809	0.205	1|1	0.684|0.769	0.81	0.847|0.781	0.002	1|1	0.807|0.817	1.39	2.205|0.571	1.335	1|1	0.351|0.362	2.19	3.336|1.042	2.631	1|1	0.129|0.945	0.78	0.693|0.868	0.015	1|1	0.571|0.872	1.27	0.863|1.675	0.330	1|1	0.845|0.603	Unigene16199_17	IDKLDIIKLSDNADELNSDEERYANESFENDTDEIPEISETDSECEIEPAMVPSNSSLYAYARNHFSERNGSLQNNNYMPYDSSSEDDQDVVISETIAEIX	-	-	-	-	-	-	-	-	-	-
379	Unigene14333_17	GG20910 [Drosophila erecta]	9538.629635	0.215	1	21	-	0.95	1.024|0.884	0.010	21|21	0.840|0.116	0.94	0.975|0.914	0.002	19|21	0.785|0.198	0.81	0.874|0.737	0.009	21|21	0.100|0.001	1.17	1.177|1.156	0.000	16|21	0.001|0.022	0.79	0.788|0.801	0.000	20|21	0.000|0.001	0.94	0.899|0.990	0.004	21|20	0.264|0.919	Unigene14333_17	MALVSDQEWEEYKSKFNKAYSDDAEDKRRRERYIKSKQMVEEHNKKYENGEVTWKMGINHLSDLTEEEYAVRCGKKVTP	67.09	6e-23	gi|194881338|ref|XP_001974805.1|	GG20910 [Drosophila erecta]	43.21	6e-11	sp|P13277|CYSP1_HOMAM	Digestive cysteine proteinase 1 OS=Homarus americanus GN=LCP1 PE=1 SV=2	67.09	3e-22
380	CL1334.Contig2_17	spatzle, isoform K [Drosophila melanogaster]	25345.229626	0.165	2	4	CL1334.Contig1_17	1.05	1.063|1.038	0.000	4|4	0.755|0.891	0.99	0.994|0.995	0.000	4|4	0.991|0.987	0.98	0.983|0.981	0.000	3|3	0.963|0.944	1.13	1.088|1.163	0.003	4|4	0.797|0.194	0.88	0.913|0.854	0.002	4|4	0.601|0.428	0.93	0.901|0.952	0.001	3|4	0.773|0.831	CL1334.Contig2_17	KDFEENLDRIFKIGRGSGLVLFNTTTAGTPTNNNYHSNQNTHQNNRNNDAIIFPDDEYICSERLEGKPYCLDVPNYLESSRLDKIDENKFEKFKSYFKDDLVQPPNITQRMNSEPQEEYYCSSTSHLIYPKSAETKESKWLLVVQHENHKQGILVEQCDNEDKPCRFQELLPKFYTSRCKQNYIFRTMVVSVDGKLHEEQVKMPSCCKCVLR	32.95	5e-22	gi|242024445|ref|XP_002432638.1|	hypothetical protein Phum_PHUM596260 [Pediculus humanus corporis]	35.37	3e-19	sp|P48607|SPZ_DROME	Protein spaetzle OS=Drosophila melanogaster GN=spz PE=1 SV=3	32.95	2e-21
381	Unigene6626_17	GI20778 [Drosophila mojavensis]	30598.20733	0.122	3	19	-	0.91	0.960|0.869	0.004	19|16	0.659|0.001	0.83	0.834|0.831	0.000	18|17	0.001|0.003	0.97	0.969|0.962	0.000	17|15	0.599|0.261	0.91	0.912|0.916	0.000	17|17	0.040|0.005	0.89	0.929|0.860	0.002	17|17	0.306|0.001	0.89	0.882|0.893	0.000	19|17	0.001|0.009	Unigene6626_17	MSNLTKSILRFGNSLIAGNSKNALNNVFGKRDFTRTLWHMCKNSEASGVTTNVLNVHKPSLSCSCGCGGAKHLHTKGERELVEFLTEEILAERKAQKIKTIPTTLEGFNVKLDGADIELTKQSDKEKIIINLNVNHTVDTEEEEPELDQNAEKAEIGEMRSKPRFEVDIVRGNTTLSFTCSFLEGTPQEGEYNDIFGIDEMCIYQGEWNDKVYAVAGDVLDGYLYDLLMNLLEEKGVSNEFVEKLSDLATAFEQISYIDLLESLSKFTTGK	69.74	2e-97	gi|195122974|ref|XP_002005985.1|	GI20778 [Drosophila mojavensis]	36.61	9e-28	sp|Q3T0B6|C1QBP_BOVIN	Complement component 1 Q subcomponent-binding protein, mitochondrial OS=Bos taurus GN=C1QBP PE=2 SV=1	69.74	7e-97
382	CL2226.Contig4_17	l(2)01289 H9 form [Drosophila melanogaster]	100273.593627	0.069	5	11	CL2226.Contig3_17;CL2226.Contig2_17;CL2226.Contig1_17	1.26	1.210|1.311	0.005	11|11	0.371|0.109	0.93	0.920|0.931	0.000	11|11	0.437|0.695	1.61	1.528|1.694	0.014	11|11	0.030|0.009	0.79	0.777|0.809	0.001	11|11	0.002|0.003	1.12	1.129|1.116	0.000	10|11	0.100|0.054	0.75	0.785|0.707	0.003	11|11	0.054|0.050	CL2226.Contig4_17	MTFSRKKVLILCVCTLLALISFPGYVDCATKKGSQATAAPPPAPIEPEAVIEEVNAKQLEKLLTDKDYVAVFWYARSCVTCDKVLAELEKIDDDTDSFGVDFVKINDKRLAKQYGIKNFPALTYFREKEPIIYDGDLMDEEGVLDFLTSLEAMDLPDRIEEVNAKILLKIIEDTDFVAVLFYDKDQKKSQKVLAELENIDDECDQNDIAFVKIDDDNEAKEWGIDEIPSIVFFERGIPHIYEGDLMKEDELLGWLVHQKRHSEIPEVTDEMKDKLVENTEHLAVIFYDKDDKQDIRVLNELENIDDELEKEGIVIVRIDNAAEAKEYGLDHLPALIYFENKIPALYEGDLMNEDEVLEWLILQKRTATIEEVTDEILVDLINDHEYVVVFFTGPCEPGE…	78.65	0.0	gi|6984066|gb|AAF34747.1|	l(2)01289 H9 form [Drosophila melanogaster]	-	-	-	-	78.65	0.0
383	Unigene25863_17	1 228 LEN=228_ minus strand_ translated	8004.866293	0.316	1	1	-	1.53	1.577|1.474	0.005	1|1	0.495|0.512	0.96	0.876|1.037	0.013	1|1	0.849|0.972	1.53	1.393|1.660	0.036	1|1	0.666|0.411	1.03	0.908|1.147	0.029	1|1	0.905|0.807	0.95	1.118|0.776	0.058	1|1	0.906|0.730	0.65	0.630|0.672	0.001	1|1	0.417|0.541	Unigene25863_17	KEGASSATNISVKSKVSKFSVASVDGSLEVENTAAEIIDDEKHSTTPNLTEFTTENYITTSTEASTTITDVDEVSP	-	-	-	-	-	-	-	-	-	-
384	CL2923.Contig1_17	GH19066 [Drosophila grimshawi]	95800.7950619996	0.019	1	1	-	0.84	0.799|0.886	0.004	1|1	0.748|0.889	0.82	0.843|0.790	0.001	1|1	0.803|0.777	0.86	0.857|0.854	0.000	1|1	0.874|0.847	0.99	1.045|0.930	0.007	1|1	0.957|0.902	0.83	0.773|0.895	0.007	1|1	0.722|0.905	0.96	1.024|0.895	0.008	1|1	0.971|0.887	CL2923.Contig1_17	PHRNUSSTALAAPLPNSNLRAYNSNSNLGKHGFDSSPGTAATTTSCADWTTTQASLAERLNRFRHKQQQQQQVGGGWLIGGEFSTPEDYYKHYSGANDCIRHNNNPYYNNSDVSSANKPTVFKRTELIPTAEPYTSAAEQHSSSLLRARFVNSKNNNNNVGQHHYKLSQQSADVATFDATESSSNPLDCYTKSSKRSRTLVRRRNNTNVQANSTTTTTIKSPRATTTGRVNSERQRTVATKAATTEFWFLSFLHSIGLGSFAQHVAVQLGVCRSNSHSFSNETLHTSRRSTPTPPTIPVENIPKPYSFDVMGLLRSMKLKDRLAISLGATLILLTLLLVVDVQMDFGVTNRHLLQQQSRVRYVNENDGSDTGGTGAFRDFKRKFLQKSNSSGSKETATP…	69.27	0.0	gi|195390379|ref|XP_002053846.1|	GJ23118 [Drosophila virilis]	57.65	7e-118	sp|Q5MJS3|DMP4_MOUSE	Extracellular serine/threonine protein kinase Fam20C OS=Mus musculus GN=Fam20c PE=2 SV=1	69.27	0.0
385	Unigene7025_17	GJ21327 [Drosophila virilis]	93395.1067169997	0.074	4	5	-	0.85	0.753|0.951	0.020	4|5	0.091|0.923	0.78	0.784|0.785	0.000	5|5	0.061|0.095	1.3	1.072|1.537	0.108	4|5	0.728|0.036	0.63	0.606|0.657	0.001	5|5	0.008|0.018	1.28	1.277|1.287	0.000	5|4	0.037|0.149	0.85	0.881|0.828	0.001	5|5	0.825|0.519	Unigene7025_17	APLLLLCVAFLCCSIGITHAQENIMPQIPPSLAECYNTSYFMNRQNRLPATIETLISLIEKVENTPTYNHDMRTLAVALLQRFRQDGIQRAYGVAEAPGLMPYSPTGFQFPKFRILLSRLIPGNAFNFPNNTLTREERCSLHFMISSSLDLRVRGDEGQVCNRLSQYRAQRLRRSANLERSGGLIGDVEVLESLNVKAQKRGLKQKGAYNTLDYDWGWTNTGNSNNNQISQCPVENGVIWTPWGTVAAGALLAGVATGLQQQTVQLRTLLALSSRNNGYTNLPQTATVNVDNRWAATLAGDLAEVALVQVPFTSTETASVGANGAWNSTVMPEWYFLTQRQNFEMTDAEIRGGLDGLIIAKNIVAWRNQASNMKLSQLLRMYYSTNGVLNSGIMACNRN…	61.75	0.0	gi|195380401|ref|XP_002048959.1|	GJ21327 [Drosophila virilis]	-	-	-	-	61.75	0.0
386	Unigene13239_17	1 322 LEN=322_ minus strand_ translated	12943.30476	0.306	1	1	-	5.97	10.000|1.936	32.514	1|1	0.025|0.246	10	-|10.000	-	-|1	-|0.040	2.3	1.749|2.854	0.611	1|1	0.448|0.098	4.32	-|4.319	-	-|1	-|0.041	1.27	2.069|0.466	1.285	1|1	0.239|0.254	0.72	0.526|0.911	0.074	1|1	0.280|0.921	Unigene13239_17	FRGEFSNLNYSLRPARVEHMDDLMYLFEMNASSFKRNESTTATMIRQYTKFIYEFVKYGTSLYGKLPTYPAGYTKICRSLEFQPGTIFAKDTYEMWRRLFQLDHNSKX	-	-	-	-	-	-	-	-	-	-
387	Unigene31707_17	GE14222 [Drosophila yakuba]	56598.36872	0.026	1	1	-	1	0.972|1.031	0.002	1|1	0.975|0.979	1.07	1.065|1.071	0.000	1|1	0.946|0.949	0.92	0.909|0.930	0.000	1|1	0.926|0.932	1.11	1.144|1.080	0.002	1|1	0.852|0.896	0.97	0.945|1.000	0.002	1|1	0.959|0.999	1.05	1.084|1.023	0.002	1|1	0.916|0.980	Unigene31707_17	RAPFTEDEDYTPLRKPKSATNTPTHGASSLNANTANAYGRTVSPSKLSPYAKEFVPRFGGSGSNSAAGAQERLERHQQQYNQQTYQQYHHQSSRPQRYSNGYQQNNHHSHNQQQYSHQITSLTASVQERLKIGTASGSSGNKNTANNYYSQNHPHQHPRHNKHHNQHHGGQGRYQRHNNSGVTNSNASSGATSSDVETIALDYLRTVIQCLNQNPGQFDTTATRFLTIFEGMENNQYVLSNAMEDIFNESIQNPNFRYMGAKLYNLLHMLNLKKDSLFHTLLKCKLDYHQQEVMQYMKTNQQQKVRETALFLAELYMQLRGDDTRIHLIAENIVYSLKQLLSKESSDNIRCICLTLKLAGYDLTADCPIEMQEIIEILQAVNHRSQGKYPLAANVISLQ…	67.31	1e-114	gi|194882345|ref|XP_001975272.1|	GG22225 [Drosophila erecta]	28.30	1e-15	sp|Q9H074|PAIP1_HUMAN	Polyadenylate-binding protein-interacting protein 1 OS=Homo sapiens GN=PAIP1 PE=1 SV=1	67.31	5e-114
388	Unigene2_17	359 991 downstream of receptor kinase [Glossina morsitans morsitans]	24485.107543	0.436	8	42	-	1.03	1.052|1.015	0.001	41|42	0.335|0.890	1.03	1.064|1.003	0.002	42|38	0.022|0.965	1.13	1.169|1.092	0.003	41|42	0.001|0.097	0.93	0.935|0.918	0.000	41|41	0.034|0.004	1.13	1.106|1.156	0.001	38|41	0.002|0.000	1	0.986|1.007	0.000	40|42	0.828|0.930	Unigene2_17	MEAIAKHDFSATADDELSFRKSQILKILNMEDDSNWYRAELDSKEGLIPSNYIEMKNHDWYYGRITRADAEKLLSNKHEGAFLIRISESSPGDFSLSVKCPDGVQHFKVLRDAQGKFFLWVVKFNSLNELVEYHRTASVSRSQDVKLRDMIHEEMLVQALYDFVPQESGELDFRRGDVITVTDRSDENWWNGEIGNRKGIFPATYVTPYHS	98.10	1e-119	gi|17136708|ref|NP_476858.1|	downstream of receptor kinase, isoform A [Drosophila melanogaster]	98.10	1e-120	sp|Q6YKA8|DRK_DROSI	Protein E(sev)2B OS=Drosophila simulans GN=drk PE=3 SV=1	98.10	3e-119
389	Unigene14471_17	GL21540 [Drosophila persimilis]	26154.812393	0.363	5	50	-	0.95	1.012|0.893	0.007	48|47	0.921|0.033	0.92	0.941|0.890	0.001	42|46	0.003|0.001	1.15	1.178|1.124	0.001	46|46	0.001|0.002	0.84	0.814|0.858	0.001	45|45	0.001|0.001	1.1	1.103|1.095	0.000	48|46	0.000|0.013	0.97	0.959|0.980	0.000	49|48	0.658|0.813	Unigene14471_17	MALSDADVQKQIKHMMAFIEQEANEKAEEIDAKAEEEFNIEKGRLVQQQRLKIMEYYEKKEKQVELQKKIQSSNMLNQARLKVLKVREDHVRNVLDEARRRLGEVTKIPSEYKEVLQKLILQALYQAMEPSVTLRCRQADIGLINEVLPATVEEYKQNIGKDVNVHIDTQNHLSADTCGGIELIALNGRLKVPNTLESRLELIAQQLVPEIRNALFGRNVNRKFTD	83.19	2e-85	gi|125777203|ref|XP_001359529.1|	GA10614 [Drosophila pseudoobscura pseudoobscura]	81.86	3e-83	sp|P54611|VATE_DROME	V-type proton ATPase subunit E OS=Drosophila melanogaster GN=Vha26 PE=2 SV=1	83.19	6e-85
390	Unigene15472_17	GF21668 [Drosophila ananassae]	17355.774513	0.155	2	2	-	1.12	1.203|1.044	0.013	2|2	0.705|0.941	0.91	0.922|0.893	0.000	2|2	0.894|0.871	1.18	1.189|1.166	0.000	2|2	0.748|0.760	0.96	0.894|1.027	0.009	2|2	0.812|0.944	0.95	1.000|0.905	0.005	2|2	0.998|0.883	0.82	0.796|0.842	0.001	2|2	0.621|0.727	Unigene15472_17	VPFTVQTHSRQVCRLYKRALRNLEAWYDRKNIYRYRAVLLRQRFEKNRCVTDMAEASRLLAAGEQELFETKHFQPKYFANSVGGCAFEREVIPPDWVIDYWHPLEKAQYPEYFAKREQRKTEFVAWWEKQYGKPDPKDLGHH	78.17	2e-63	gi|194765815|ref|XP_001965021.1|	GF21668 [Drosophila ananassae]	46.21	1e-26	sp|Q9CQJ8|NDUB9_MOUSE	NADH dehydrogenase [ubiquinone] 1 beta subcomplex subunit 9 OS=Mus musculus GN=Ndufb9 PE=1 SV=3	78.17	8e-63
391	Unigene14407_17	255 740 uncharacterized conserved protein [Glossina morsitans morsitans]	16612.094104	0.142	1	3	-	1.04	0.912|1.170	0.033	3|3	0.739|0.862	1.21	0.938|1.491	0.153	3|3	0.879|0.648	0.62	0.651|0.596	0.002	3|3	0.058|0.025	1.74	2.092|1.383	0.251	3|3	0.268|0.122	0.71	0.731|0.688	0.001	3|3	0.121|0.099	1.11	1.005|1.223	0.024	3|3	0.990|0.401	Unigene14407_17	MVRRGRSASPPPASRRSVPTHHAPAPTPNVPARTAPAAPPAPVQAAPSAVGAPQQPSMFQQMAATAGGVAVGSAVGHTLGAGITSMFSGSGDKEVAAPAAAAAAPGAQQQYYGNAAQPNEPQGACAWEIKQFLQCAQGQSDLTLCEGFNEALRQCKTQHHLQ	82.24	1e-25	gi|195040237|ref|XP_001991031.1|	GH12294 [Drosophila grimshawi]	48.25	1e-11	sp|Q9D1L0|CHCH2_MOUSE	Coiled-coil-helix-coiled-coil-helix domain-containing protein 2, mitochondrial OS=Mus musculus GN=Chchd2 PE=1 SV=1	82.24	6e-25
392	Unigene7609_17	113 1411 26S proteasome regulatory complex ATPase RPT1 [Glossina morsitans morsitans]	48852.1459560001	0.139	4	13	-	1.14	1.137|1.138	0.000	13|13	0.039|0.009	1.08	1.070|1.089	0.000	13|13	0.194|0.132	1.01	0.961|1.061	0.005	13|13	0.368|0.475	1.17	1.162|1.171	0.000	11|13	0.007|0.008	0.96	1.004|0.914	0.004	13|13	0.983|0.056	0.93	0.917|0.938	0.000	12|13	0.077|0.138	Unigene7609_17	MPDYLGDDQRKVKSDELEEKEIKSLDEGDIELLKTYGQSQYHKAIKTIEEDIQKAVKQVNELTGIKESDTGLAPPALWDLAADKQILQNEQPLQVARCTKIINADSDDPKYIINVKQFAKFVVDLADSVAPTDIEEGMRVGVDRNKYQIHIPLPPKIDPTVTMMQVEDKPDVTYSDVGGCKEQIEKLREVVETPLLHPEKFVNLGIEPPKGVLLFGPPGTGKTLCARAVANRTDACFIRVIGSELVQKYVGEGARMVRELFEMARSKKACLIFFDEIDAIGGARFDDGAGGDNEVQRTMLELINQLDGFDPRGNIKVLMATNRPDTLDPALMRPGRLDRKVEFGLPDLEGRTHIFKIHARSMSVERDIRFELLARLCPNSTGAEIRSVCTEAGMFAIRA…	97.92	0.0	gi|390179732|ref|XP_003736959.1|	GA12266 [Drosophila pseudoobscura pseudoobscura]	92.38	0.0	sp|Q4R4R0|PRS7_MACFA	26S protease regulatory subunit 7 OS=Macaca fascicularis GN=PSMC2 PE=2 SV=3	98.61	0.0
393	CL1282.Contig1_17	Cht6, isoform A [Drosophila melanogaster]	325839.857733996	0.023	5	8	-	0.88	0.914|0.848	0.002	7|9	0.307|0.200	0.85	0.831|0.872	0.001	9|8	0.011|0.117	0.89	0.917|0.864	0.001	9|9	0.564|0.330	0.99	0.985|0.997	0.000	9|9	0.926|0.982	0.85	0.874|0.823	0.001	9|9	0.135|0.090	0.97	0.939|0.996	0.002	8|9	0.564|0.991	CL1282.Contig1_17	RGAVWQTLFLLCAMLFINEVRSEGRVVCYYTNWSVYRPGTAKFNPQNINPYLCTHLVYAFGGFTKDNQMKPFDKYQDIEQGGYAKFTGLKTYNKQLKTMIAIGGWNEASSRFSPLMANPERRQQFIKNILKFLRQNHFDGIDLDWEYPAQREGGKPRDRDNYAQFVQELRAEFERESQKTGRPRLLLTMAVPAGIENIEKGYDIPKLNKYLDWFNVLSYDFHSSHEPSANHHAPLYSLEEESEYNYDAELNIDYSIKYYLKAGADRDKLVLGIPTYGRSYTLINEESTELGAPSEGPGEQGDATREKGYLAYYEICQNMKDDPEWTVVQPNPNAMGPYAYRRNQWVGYDDEAIVRKKAQYVVEHGLGGIMFWAIDNDDFRGTCTGKPYPLIEAAKDAML…	70.29	0.0	gi|195044865|ref|XP_001991892.1|	GH11814 [Drosophila grimshawi]	43.69	2e-91	sp|Q9BZP6|CHIA_HUMAN	Acidic mammalian chitinase OS=Homo sapiens GN=CHIA PE=1 SV=1	70.29	0.0
394	CL3433.Contig2_17	GE12047 [Drosophila yakuba]	53108.2421460001	0.024	1	1	CL3433.Contig1_17	1.56	1.996|1.117	0.386	1|1	0.247|0.896	0.98	0.999|0.951	0.001	1|1	0.998|0.959	0.85	1.005|0.698	0.047	1|1	0.994|0.586	1.79	1.628|1.949	0.052	1|1	0.304|0.119	0.56	0.596|0.517	0.003	1|1	0.388|0.312	0.68	0.516|0.838	0.052	1|1	0.270|0.803	CL3433.Contig2_17	MSDINKTSLMSNQQLPTATTTGQMLAPANTPPQKLNSGSATGNPRNKCALKPGHSLMDWIRLGNSGADLAGTRGRITPVYSDELARHNTREDAWLAIRGKVYNVTRYMDFHPGGVDELMRGVGRDATKLFDEIHAWVNYQQLLVKCYVGPLRALVKMSSIPEGKTLAPTANFNIPSSNKPVNTNTEIVPRFDWIQKRQDLTIYLYTRQLCNPGLLLHQKCAKLLQLQVQIDSAQHIFEFELHEEVDWPPKTVRVGSESGKIEVTLTKVEPGLWPTYGAHTVSKGVVGEIEDLQYEYEVVKCTEFNHDSFVLCLRGIQDTLMVLPIGYHMTVAALINGDLTRRSYTPVLGKFLPQPYADNESNSTNLNFLIKSYTEGILSTHLRQKQDGQMLLLSTPHGN…	52.66	1e-136	gi|195487158|ref|XP_002091791.1|	GE12047 [Drosophila yakuba]	34.66	2e-64	sp|Q7L1T6|NB5R4_HUMAN	Cytochrome b5 reductase 4 OS=Homo sapiens GN=CYB5R4 PE=1 SV=1	52.66	4e-136
395	CL1702.Contig2_17	GI19135 [Drosophila mojavensis]	17121.451923	0.203	3	6	CL1702.Contig1_17	0.69	0.675|0.698	0.000	6|6	0.022|0.045	0.78	0.816|0.742	0.003	6|6	0.068|0.036	0.79	0.782|0.795	0.000	6|6	0.155|0.036	0.86	0.862|0.851	0.000	6|5	0.190|0.083	0.9	0.870|0.923	0.001	6|6	0.124|0.596	1.13	1.155|1.096	0.002	6|6	0.308|0.429	CL1702.Contig2_17	MSGNLIKVFVYGTLKRGEPNHHWLTRSENGHSRFLCEAQTVTKFPLIIGTRYNIPFLLNKPGVGHNIYGEVYEVDDTMFANLDELEDYPNYYDREIQQVKNKNNEHIDCWLYLIKQFPEHLLSKRYLEKYHNSEALPYCESYV	64.34	1e-50	gi|195121650|ref|XP_002005333.1|	GI19135 [Drosophila mojavensis]	63.50	1e-48	sp|Q9W0Y2|YS11_DROME	Putative gamma-glutamylcyclotransferase CG2811 OS=Drosophila melanogaster GN=CG2811 PE=2 SV=2	64.34	4e-50
396	Unigene37212_17	GI15893 [Drosophila mojavensis]	36457.118345	0.032	1	1	-	1.27	1.104|1.432	0.054	1|1	0.908|0.556	1.22	1.160|1.279	0.007	1|1	0.831|0.750	1.33	1.259|1.410	0.011	1|1	0.784|0.610	0.95	1.025|0.868	0.012	1|1	0.974|0.799	1.28	1.245|1.319	0.003	1|1	0.774|0.694	0.95	1.036|0.870	0.014	1|1	0.963|0.846	Unigene37212_17	CREDEYLCKDGMRCISNSKVCDRVTDCIDADDEDGCEGSGESACRYNEFQCGNGQCIPMRELCDNIYDCVDYSDERDCDLEDIGRNIFDNDEIIREYAPHDHRVLTTEAPVLVGLDAKEYYLYNAGNYEKSNAQHACNERQFECGNKVCIPLHLRCDGFFHCNDLTDEYGCDRYRTEQRRTTLPPSKLVRTTHSPWWNTSAATTATTTTSSPSIITTDANIVTPVVPIVGYNNNTCLENLEFSCRNGDCIPIESVCDGAADCKLREDEDYSLCNCSSDKWKCLRGGGCIAKTQVCDGKRQCKDGSDESNC	48.94	2e-71	gi|195131899|ref|XP_002010382.1|	GI15893 [Drosophila mojavensis]	27.51	2e-17	sp|A2VEC9|SSPO_HUMAN	SCO-spondin OS=Homo sapiens GN=SSPO PE=2 SV=1	48.94	6e-71
397	Unigene14891_17	GI12244 [Drosophila mojavensis]	20489.398518	0.575	7	82	-	0.68	0.676|0.682	0.000	79|78	0.001|0.001	0.64	0.631|0.653	0.000	81|79	0.001|0.001	0.57	0.588|0.546	0.001	79|78	0.001|0.001	1.2	1.258|1.148	0.006	81|82	0.001|0.001	0.54	0.540|0.544	0.000	81|81	0.000|0.000	0.94	0.903|0.979	0.003	79|79	0.007|0.745	Unigene14891_17	MRSLPTLWRMAEEMQRLAFPRRSPFSAFYDDFFNSPFTYSPWSRLSRLQQDLQNQVEPKLGKEGYQVSLDVAQFKPNELTVKVVDNNVVVEGKYEGREDEHGFISKHFVRSFTLPHGFKADQAISTLSSDGVLTVSVPKPAGLEDNAAERVIPIQQTGPAHLNVKENPPLEDKSAEIEDKK	97.25	4e-50	gi|373501927|gb|AEY75237.1|	Hsp10, partial [Bactrocera dorsalis]	45.30	7e-35	sp|P02516|HSP23_DROME	Heat shock protein 23 OS=Drosophila melanogaster GN=Hsp23 PE=2 SV=2	97.25	1e-49
398	Unigene15011_17	76 1089 minus strand Sarcophaga pro-cathepsin B [Sarcophaga peregrina]	38330.445311	0.370	9	86	-	0.8	0.781|0.814	0.001	76|85	0.001|0.001	0.9	0.880|0.915	0.001	76|77	0.001|0.001	0.81	0.770|0.859	0.004	81|84	0.001|0.001	0.97	0.931|1.004	0.003	80|76	0.001|0.943	0.98	1.026|0.936	0.004	83|71	0.481|0.042	1.14	1.092|1.192	0.005	83|84	0.001|0.001	Unigene15011_17	IIFVGFFLLAVVIVVSGENDATNPHFLSNEFIELVRNNAKTWTPGRNFPEFIGEKYIRGLMGVHPDSHKFALPQLIKESGESEFELPEEFDSRKQWPQCPTISEIRDQGSCGSCWAFGAVEAMSDRFCIHSNGTKNFHFSADDLVSCCHTCGFGCNGGFPGAAWSYWTRKGIVSGGTFGSKQGCRPYEIAPCEHHVNGTRPACDGEHGKTPRCQHKCQAGYKGDYAKDKHYGAKSYSIGRNQRDIQEEIYKNGPVEGAFTVYEDLILYKDGVYQHVVGKALGGHAIRILGWGIEKGTPYWLIANSWNTDWGNNGYFKILRGEDHCGIENSITAGIPRL	71.43	8e-142	gi|496317|dbj|BAA04103.1|	Sarcophaga pro-cathepsin B [Sarcophaga peregrina]	57.75	3e-108	sp|A1E295|CATB_PIG	Cathepsin B OS=Sus scrofa GN=CTSB PE=1 SV=1	71.43	3e-141
399	Unigene30177_17	GI16994 [Drosophila mojavensis]	52358.952668	0.041	1	1	-	1.45	1.179|1.715	0.144	1|1	0.842|0.340	1.15	0.938|1.352	0.086	1|1	0.945|0.720	1.55	1.296|1.798	0.126	1|1	0.759|0.341	0.99	1.025|0.964	0.002	1|1	0.981|0.945	1.11	1.235|0.983	0.032	1|1	0.782|0.986	0.78	0.870|0.696	0.015	1|1	0.850|0.595	Unigene30177_17	LMDSIVDSLFAVFVTLGNVPIIRCPRNSAAEMVARKLEKKLRENLWDSRSNLFHMDATQAGGGVFSFQRPVLLLLDRNLDLATPLHHTWSYQALVHDVLELGLNLVYVQDDSATNTGTRKKPKSCDLDRNDRFWVTHKGSPFPTVAEAIQEELESYRNSEEEIKRLKTSMGIDGETEVVFSMVNDTTARLTNAVNSLPQLMEKKRLIDMHTKIATVILNYIKSRRLDSYFELEEKIMSKQTLDRPLLELLKDPEFGLPEDKMRLFIIYYICAQNVPEYEFERMKEALQEAGCDLSPLAYVQRWKGIMNRSPTLSQAAQYEGGGTRTVSMFSKLVSQGSSFVMEGVKNLVVKRHSLPVTKITEQVMECRSNSETDDYLYLDPKLLKGGDVLPKNRAPFQD…	88.24	0.0	gi|195114288|ref|XP_002001699.1|	GI16994 [Drosophila mojavensis]	82.95	0.0	sp|O18637|SLY1_DROVI	Protein sly1 homolog OS=Drosophila virilis GN=Slh PE=3 SV=1	88.24	0.0
400	Unigene29552_17	GJ10185 [Drosophila virilis]	65592.0474040002	0.012	1	1	-	0.71	0.731|0.688	0.001	1|1	0.657|0.532	0.68	0.661|0.689	0.000	1|1	0.472|0.609	0.68	0.603|0.752	0.011	1|1	0.455|0.687	1.05	0.909|1.200	0.042	1|1	0.896|0.721	0.66	0.776|0.546	0.026	1|1	0.726|0.354	0.95	0.879|1.024	0.011	1|1	0.861|0.980	Unigene29552_17	GSGSSNVNALDLIDLGDGNIRVGKISFNSNEVLGKGCEGTFVFRGTFEERSVAVKRLLPECFTFADREVALLRESDAHENVVRYFCTEQDRQFRYIAVELCAATLQDYTEGVRSVELRRQINVWEVLRQAAAGLSHLHSLNIVHRDIKPQNVLLSLPDVSGIVRVMISDFGLCKKLNFGKTSFSRRSGVTGTDGWIAPEMMHGQRTTTAVDIFSLGCVYYYVLSTGSHAFGDALKRQHNILTHDYNLFKLKVDTYDEANVPEEASKFILAEQLIADMIHKDPQSRPFARCISTHPVFWNNQKILAFLQDVSDRVEKLQFHVEPLKSLEKNGHCIVREDWNTHVDPLITDDLRKYRGYMGASVRDLLRALRNKKHHYHELAPEVQQKLGCIPNGFTNYWI…	73.74	0.0	gi|195395788|ref|XP_002056516.1|	GJ10185 [Drosophila virilis]	53.90	2e-126	sp|Q9EQY0|ERN1_MOUSE	Serine/threonine-protein kinase/endoribonuclease IRE1 OS=Mus musculus GN=Ern1 PE=2 SV=1	73.74	0.0
401	Unigene23113_17	1 275 LEN=275_ minus strand_ translated	10446.261533	0.129	1	1	-	1.55	2.082|1.018	0.566	1|1	0.210|0.990	0.21	0.222|0.198	0.000	1|1	0.072|0.063	1.07	1.079|1.054	0.000	1|1	0.939|0.947	1.43	0.969|1.894	0.428	1|1	0.965|0.131	0.17	0.224|0.113	0.006	1|1	0.054|0.037	0.16	0.117|0.202	0.004	1|1	0.032|0.068	Unigene23113_17	XLYPLFAGPTGKKRQRWSKLFDLRVISQYQPIVLIDNTRPVLQIPFTTEMAQEEENPSSNFQSVPFETGHSTPPIGTIPPFKIQCHGPPTAGX	-	-	-	-	-	-	-	-	-	-
402	Unigene6432_17	GI20000 [Drosophila mojavensis]	14114.429908	0.449	4	20	-	0.75	0.778|0.731	0.001	20|20	0.001|0.001	0.68	0.718|0.646	0.003	19|19	0.001|0.001	0.79	0.775|0.800	0.000	18|20	0.001|0.001	0.91	0.859|0.967	0.006	18|17	0.001|0.237	0.72	0.734|0.700	0.001	17|18	0.000|0.000	0.93	0.918|0.932	0.000	20|20	0.265|0.261	Unigene6432_17	MTEEVSPKAFPLADAQLTAKIMNLLQQALNYNQLRKGANEATKTLNRGLSDIIVMAADTEPIEILLHLPLLCEDKNVPYVFVRSKQALGRACGVSRPIVACSVTTNDGSQLKSQIQSIQHEIERLLV	93.70	2e-47	gi|194765585|ref|XP_001964907.1|	GF22789 [Drosophila ananassae]	92.91	9e-48	sp|Q9U3Z7|NH2L1_DROME	NHP2-like protein 1 homolog OS=Drosophila melanogaster GN=hoip PE=2 SV=1	93.70	9e-47
403	Unigene7406_17	GJ24297 [Drosophila virilis]	13373.604369	0.534	3	4	-	1.48	1.614|1.349	0.035	4|4	0.135|0.169	0.99	0.932|1.050	0.007	4|4	0.812|0.920	1.63	1.767|1.498	0.036	4|4	0.062|0.017	0.88	0.834|0.924	0.004	3|4	0.368|0.539	1.08	1.148|1.003	0.011	4|4	0.360|0.995	0.72	0.676|0.760	0.004	3|4	0.056|0.104	Unigene7406_17	MDVFLMIRRHKTTIFTDAKENTSVAELKRMIEGILKVRPHDQKLYNQDNEVMEDENTLQDYGIQMSTAKAQAPAQLGLALRDEHGEFEPLEITPYSSPPDLPEVMKNQEAANGQEQVA	83.90	5e-54	gi|195391051|ref|XP_002054179.1|	GJ24297 [Drosophila virilis]	55.08	2e-30	sp|P62870|ELOB_RAT	Transcription elongation factor B polypeptide 2 OS=Rattus norvegicus GN=Tceb2 PE=1 SV=1	83.90	2e-53
404	Unigene31822_17	GJ17765 [Drosophila virilis]	82701.4124509999	0.297	15	37	-	0.96	0.908|1.007	0.005	36|35	0.021|0.940	0.66	0.675|0.639	0.001	35|37	0.001|0.001	1.15	1.097|1.212	0.007	36|36	0.030|0.001	0.86	0.865|0.860	0.000	34|36	0.001|0.001	0.79	0.755|0.815	0.002	36|34	0.000|0.000	0.69	0.729|0.651	0.003	37|36	0.001|0.001	Unigene31822_17	LDCDQISSLDLRPWQSKQEEEELHEHVEMEPEVQEAISEINIELLEAAVERAKMALEERKRFEYESWLSQGGISAKSSDGAAASFSKANRNALTLANSSLMFELTSNEILNSVNSINRRKRQTFDSNFNRNELSETLQTIDINAILGGSTQQVNTECDDPPIACDTSSPFRTMTGYCNNLRNPNWGKSLTTFSRLLPSQYDDGISKVRLLSVNGSPLPNPRTVSTVIHPDISNLHTRYSLMVMQFAQFLDHDLTLTPIHKGFHESIPSCRRCNSPQAVHPECNPFPVPPGDYFFPEVNVTSGERFCFPSMRSLPGQLALGPREQINQNTHFLDASMVYGENHCVVNKLRGFGGRLNSTIRSFGKELLPQSNSHPECKSRNNLCFIAGDDRASEQPGLTA…	81.57	0.0	gi|195388280|ref|XP_002052808.1|	GJ17765 [Drosophila virilis]	39.39	3e-96	sp|Q3UQ28|PXDN_MOUSE	Peroxidasin homolog OS=Mus musculus GN=Pxdn PE=2 SV=2	81.57	0.0
405	Unigene14510_17	114 716 minus strand 23kDa heat shock protein ScHSP23 [Sarcophaga crassipalpis]	22741.368159	0.527	6	37	-	0.72	0.769|0.666	0.005	36|36	0.001|0.001	0.72	0.753|0.685	0.002	33|35	0.001|0.001	0.67	0.669|0.663	0.000	34|36	0.001|0.001	1.05	1.001|1.091	0.004	36|37	0.996|0.048	0.7	0.721|0.686	0.001	37|35	0.000|0.000	1.06	0.998|1.130	0.009	36|32	0.986|0.004	Unigene14510_17	MSSLPILLNLIDELDRDNYHGNDFGLGLYPHHIHRHHHHRHEPTAASVGYSLPLSLVSRLGERTLSRRAQQGESRMSPVGKDGLQVCMDVAQFKPSELSVKVVDNSIIIEGKHEEREDEHGYISRHFVRRYTLPKDYDADRVISTLSSDGVLTVSAPKPQDEKSNERVVQIQQTGPAHLNVKHNTEEKIGDANGETEQKUK	69.31	2e-71	gi|333471221|gb|AEF38375.1|	HSP24 [Lucilia cuprina]	51.92	5e-48	sp|P02517|HSP26_DROME	Heat shock protein 26 OS=Drosophila melanogaster GN=Hsp26 PE=1 SV=2	69.31	6e-71
406	Unigene15478_17	GJ22975 [Drosophila virilis]	109206.319467	0.151	10	115	-	0.78	0.821|0.743	0.003	109|111	0.001|0.001	0.79	0.820|0.755	0.002	114|115	0.001|0.001	0.71	0.726|0.697	0.000	110|114	0.001|0.001	1.12	1.109|1.130	0.000	113|111	0.001|0.001	0.7	0.675|0.718	0.001	110|114	0.000|0.000	0.97	0.944|0.988	0.001	112|114	0.038|0.837	Unigene15478_17	LCAAIALLAGAFLVNATPMLGAKQCTWGPSYWCSNLTNAKGCHAVRHCIQTVWEKQNVQVDDDSICKICKDMVTQARDQLRSNETMEELKEVFEGSCNLIPIKIVKKECDKLADDFVPELVEALSSEMNPDQVCSVAGLCNNAHIDELLKFYYQSALDGTLKEEDESDESKESKESKEVVSTTPNQHQLTCGNCNHLSSLIAEKFNKANRDEVLENILYLCGEMSSFSDACSNIILTYFNDIYNHMKENLNGFGICHMSGSCAANYHKHAEDPVEPEDALALASNLGDDIPCKLCEQLVQHLRDVLIANTTATEFKQVLHGLCNQTKGFREECNSLVEQYYDVIYNELVNNLDANGACFLIGVCPKGNDEVFKGEIRPLLPSFPPAEIKVTLRKLGANE…	58.87	0.0	gi|195390893|ref|XP_002054102.1|	GJ22975 [Drosophila virilis]	24.07	2e-32	sp|P07602|SAP_HUMAN	Proactivator polypeptide OS=Homo sapiens GN=PSAP PE=1 SV=2	58.87	0.0
407	Unigene15034_17	72 809 LEN=985_ minus strand_ translated	27576.404973	0.581	10	130	-	0.96	0.976|0.939	0.001	125|125	0.748|0.171	1.01	1.015|0.997	0.000	120|121	0.721|0.958	1.11	1.127|1.087	0.001	129|128	0.001|0.007	0.86	0.843|0.873	0.000	126|124	0.001|0.001	1.2	1.210|1.187	0.000	125|122	0.000|0.000	1.08	1.068|1.096	0.000	122|126	0.009|0.001	Unigene15034_17	MSKFFLAALLCVVACGQLSFAASIAEAINADLRVHLEGYNKILAGVDEAHKADLEKLIAQTEAALKEADPKAKNTILDGLTGSFPTEFNQYLNRKLQELNVDGEIQQSLDFYKGLLSKSEASEFKADIDESIESLKAIAQEADVGKKVDRYLKFTQVHRASFQEYLKKQTLPQLEKSLNGAIKFLDGLLAEADIKHKDEIAALKVKAEGGLTTTSLEDKQKIYYEVTNPENKDVFNYLREKYIEKQ	-	-	-	-	-	-	-	-	-	-
408	Unigene15725_17	GK23749 [Drosophila willistoni]	10862.857538	0.389	3	17	-	0.74	0.735|0.749	0.000	17|17	0.001|0.001	0.73	0.713|0.751	0.001	14|16	0.001|0.001	0.74	0.717|0.769	0.001	17|17	0.002|0.003	0.99	0.974|1.015	0.001	17|17	0.649|0.820	0.73	0.758|0.694	0.002	17|16	0.000|0.000	0.95	0.919|0.974	0.002	16|17	0.481|0.873	Unigene15725_17	MRASIVRLGKVSPKLKELRIHLCQTDEASKGAREYIEKFYPNLKKNNPELPILIRECSGVQPRLWARYALGKETSVPLTNQSAPEIEKQVEAVAK	65.26	1e-31	gi|125986425|ref|XP_001356976.1|	GA13724 [Drosophila pseudoobscura pseudoobscura]	62.03	5e-24	sp|O43678|NDUA2_HUMAN	NADH dehydrogenase [ubiquinone] 1 alpha subcomplex subunit 2 OS=Homo sapiens GN=NDUFA2 PE=1 SV=3	65.26	5e-31
409	Unigene7_17	GI14962 [Drosophila mojavensis]	38584.65789	0.022	1	2	-	0.56	0.549|0.562	0.000	2|2	0.096|0.094	0.8	0.929|0.679	0.031	2|2	0.903|0.378	0.51	0.466|0.559	0.004	2|2	0.045|0.109	1.08	1.001|1.165	0.013	2|2	0.998|0.640	0.75	0.699|0.794	0.005	2|2	0.320|0.647	1.4	1.551|1.242	0.048	2|2	0.203|0.640	Unigene7_17	SGAVEALPITSKPIEGTAENLAWQAWLMLPPEQKQLEKSRKVTPKSIFSLPFRDCPPGHQLFQSRCIPTVNINQSDLLTQQVLGLFGGSDTGGTGTTGHDNAYEIDYGDEEYDLGLGEGEPAMMYEAPQPFNGGGLVVGASNTQQPPARDEPLKFNLFKEKFPTNDYEADISSGAMEGSGGARPLTDLLASNGSEGEHAGMAGNDNDAGATFFNSTQFLDAIQGFFQRHVVAAQGESNATTAAAEGNANTAEQNIRPVNGSQGLADLSAAGNNTSAFADGDIDAIILPAVGTGTTAKTVSGYAGDLEPQRVSLFKDDSSIHLVTTVIAQPARDSHTDGEGADAGDLVAAAQQHENSITQFLRADALLP	46.01	3e-29	gi|195393096|ref|XP_002055190.1|	GJ18928 [Drosophila virilis]	39.63	4e-25	sp|P40795|FOG_DROME	Protein folded gastrulation OS=Drosophila melanogaster GN=fog PE=2 SV=1	46.01	1e-28
410	Unigene15065_17	GK25248 [Drosophila willistoni]	28880.334033	0.047	1	3	-	1.2	1.217|1.186	0.000	3|3	0.378|0.439	1.12	1.228|1.016	0.022	3|3	0.376|0.968	1.38	1.349|1.418	0.002	3|3	0.165|0.109	0.87	0.837|0.894	0.002	3|3	0.340|0.500	1.29	1.212|1.359	0.011	3|3	0.349|0.188	0.92	0.999|0.842	0.012	3|3	0.998|0.453	Unigene15065_17	RVSAEDVEKCSERFAKAKAVNSLLRHVADILEYDSSEKLEELYLKTAWHFEKKYNSKTVAYDIFKQSVTDPSVFDECGLDEHTKEVLLNNIKRKLVSPTVKIRADIECSCYGYEGIDAVKAALKTGLDLSTEELPVRINLIAPPLYVMTTSTTKKTEGLKALETAIENIRNKIIESEGEFKVIMPPKLVTAIDEADLARRLERAEAENQEVGGDDDEDADGDQEGMQFDPEKEFNHRGERTAAHNDNEEEDEEE	85.66	9e-100	gi|195447450|ref|XP_002071219.1|	GK25248 [Drosophila willistoni]	83.61	8e-95	sp|P41374|IF2A_DROME	Eukaryotic translation initiation factor 2 subunit 1 OS=Drosophila melanogaster GN=eIF-2alpha PE=2 SV=1	85.66	3e-99
411	CL2867.Contig1_17	GE13150 [Drosophila yakuba]	69191.2479580001	0.115	6	17	-	0.9	0.801|1.006	0.021	15|14	0.001|0.963	0.87	0.829|0.911	0.003	15|14	0.001|0.144	0.84	0.820|0.853	0.001	16|15	0.075|0.036	1.12	1.193|1.044	0.011	15|15	0.001|0.327	0.8	0.796|0.799	0.000	11|15	0.000|0.001	0.95	1.007|0.892	0.007	17|17	0.924|0.081	CL2867.Contig1_17	KMQSSVALENLRFLMKKYKQCLEAYIVPTEDSHQNEYISQHDARRAFISGFNGSAGTAVVTSNKAFMWTDGRYYQQAEKQLDSNWVIMKDGLPSTPSIGKWICGNIPNGSNVGVDPNLLSYRQWKPIEKDLKSANCTLLPIEENLIDLVWKEQPSRSLNPILYLEQKFSGVTVADKWKDVKNKMSDKKASALVVTSLDEIAWFLNLRGSDIDFNPVFFAYLIIEINSIKLFIDESKLPKYFKDYQEENGVHIIVQPYDCIGRDLKAIVNSLKEGKIWISSNSSYFLSSLIPKNIRIQEITPLALNKAVKNKSEIMGLVNCHIRDGVALSQYFAWLEYSVINGMNVNEISGAAKLEEFRSKNEYYKGLSFPTISSSGINGSIIHYHPTEDTNRPITVKEI…	66.56	0.0	gi|198453215|ref|XP_002137619.1|	GA27324 [Drosophila pseudoobscura pseudoobscura]	47.89	2e-159	sp|Q9NQW7|XPP1_HUMAN	Xaa-Pro aminopeptidase 1 OS=Homo sapiens GN=XPNPEP1 PE=1 SV=3	66.56	0.0
412	Unigene7222_17	1 234 minus strand tropomyosin 1 [Glossina morsitans morsitans]	9061.704538	0.667	4	56	-	2.11	2.258|1.967	0.042	56|56	0.001|0.001	1.85	1.957|1.745	0.022	56|55	0.001|0.001	3.51	3.650|3.368	0.040	54|55	0.001|0.001	0.6	0.583|0.623	0.001	55|54	0.001|0.001	2.92	2.815|3.033	0.024	55|55	0.000|0.000	0.83	0.824|0.838	0.000	52|56	0.001|0.001	Unigene7222_17	QAADESERIRKALENRTNLEDDRVAILETQLVQAKLIAEEADKKYEEVARKLVLMEQDLERSEEKVELSESKIVELEE	93.59	2e-31	gi|45553375|ref|NP_996216.1|	tropomyosin 1, isoform L [Drosophila melanogaster]	64.10	4e-19	sp|P86704|TPM_PANBO	Tropomyosin OS=Pandalus borealis GN=TM1 PE=1 SV=1	96.15	2e-31
413	Unigene6701_17	GD16000 [Drosophila simulans]	10213.814689	0.187	1	6	-	1.05	0.955|1.140	0.017	5|6	0.776|0.695	1.1	1.187|1.017	0.014	5|5	0.354|0.966	0.84	0.842|0.845	0.000	6|4	0.294|0.272	1.38	1.351|1.414	0.002	6|5	0.059|0.001	0.9	0.809|0.985	0.015	4|5	0.156|0.963	1.14	1.218|1.069	0.011	5|6	0.142|0.792	Unigene6701_17	MKFVGVIALLLVVVLAALLDYAVAADCDYRGQHANRGETFQVKGECNVYTCQGPGEITAKTCPAIVAPPSCKYTPQDNSKPYPSCCESYDC	42.42	2e-08	gi|195129816|ref|XP_002009350.1|	GI15280 [Drosophila mojavensis]	-	-	-	-	42.42	1e-07
414	Unigene31657_17	GI22245 [Drosophila mojavensis]	86345.4487819997	0.021	1	1	-	0.95	0.901|1.003	0.005	1|1	0.905|0.998	0.8	0.946|0.662	0.040	1|1	0.954|0.570	1.13	1.049|1.217	0.014	1|1	0.963|0.801	0.84	0.822|0.858	0.001	1|1	0.754|0.777	0.95	0.820|1.086	0.035	1|1	0.792|0.932	0.85	1.028|0.662	0.067	1|1	0.967|0.509	Unigene31657_17	ENSPAADGAVEAGDIILKVNGTDVHRYTTKEVLKCLRLSDDSVTLELRRDPKLKARLKEQLANTKNPHYEDIEPSPHIYDYKASSCRSPTTHHRSLSLQDSYEPPHNSNSNSSSSPAIRYAKSPTHLPQRQGSLPTPAPTSQQQLQGNHSRSSSASSAQLQFGDINTTVASGGDAGGATCTSPTSRPSRIPTALKAPQKPPVQHSPQHKRPRPSQIPTKAGTAAINGNAPAIAPTATITAGCVSGGGAHLQHSNSYSGGSIRFTQQQQQPALQQKERDAEPNSAPPQPAKAPRFEAYMMTGELILNLSRTSQSSNLLPGHAKKIDSLRDSPQRAVVAARANGALAPRASGESSPTSSSSVDSPTHMASSESAHHHKDRDKRRYQQPHHHLIQQQLDSIN…	54.29	2e-74	gi|195390622|ref|XP_002053967.1|	GJ23051 [Drosophila virilis]	-	-	-	-	54.29	6e-74
415	Unigene34594_17	GI17886 [Drosophila mojavensis]	11172.719275	0.398	2	2	-	1.03	1.077|0.975	0.005	2|2	0.900|0.971	1.09	1.148|1.039	0.006	2|2	0.799|0.957	0.73	0.761|0.695	0.002	2|2	0.544|0.344	1.41	1.426|1.396	0.000	2|2	0.238|0.187	0.78	0.740|0.828	0.004	2|2	0.439|0.730	1.05	1.056|1.050	0.000	2|2	0.924|0.935	Unigene34594_17	EEPCHPTARCENLPGSYRCICPEGTVGDGLTQQGCIKPKECYKDDDCANNLACLSDKCTEPCINTTCGPNALCNAENHQAACYCPPGHLGDPSEHTVG	66.33	6e-32	gi|195117710|ref|XP_002003390.1|	GI17886 [Drosophila mojavensis]	-	-	-	-	66.33	3e-31
416	CL3777.Contig2_17	GJ21102 [Drosophila virilis]	24822.921229	0.033	1	2	CL3777.Contig1_17	1.31	1.279|1.344	0.002	2|2	0.588|0.449	1.24	1.166|1.307	0.010	2|2	0.777|0.616	1.14	1.210|1.065	0.011	2|2	0.713|0.909	1.21	1.346|1.070	0.038	2|2	0.402|0.867	1.04	0.977|1.109	0.009	2|2	0.971|0.880	0.93	0.951|0.917	0.001	2|2	0.930|0.881	CL3777.Contig2_17	AKSMLLIYFLLALAVSQTKTVAGGRILGIFPHFGYSHFKVFFPLLRTLAEHGHHVTVVTHIQAPDNTTANYKELLIVGQKTRNMVTFSDVLPRRPLHYLLLEAEALHTEGQKACKLFYESGHIDTILKQHEQEPFDLVITEYFNTDCQLGIPYLLEVPIVGLSSCLLMPYYYNRIALPDFPSHVQSEFVGFPEELNWHERLLNFVQANVIKNLYR	51.35	4e-58	gi|195387694|ref|XP_002052529.1|	GJ21102 [Drosophila virilis]	-	-	-	-	51.35	1e-57
417	CL689.Contig1_17	scribbled, isoform M [Drosophila melanogaster]	99069.1823229997	0.015	1	1	Unigene32100_17	1.17	1.203|1.143	0.002	1|1	0.806|0.873	1.46	1.187|1.740	0.153	1|1	0.803|0.432	1.08	1.168|0.986	0.017	1|1	0.874|0.981	1.12	1.196|1.035	0.013	1|1	0.789|0.947	1.29	1.416|1.156	0.034	1|1	0.596|0.869	1.23	1.003|1.453	0.101	1|1	0.997|0.557	CL689.Contig1_17	MFKCIPIFKGCNRQVEFVDKRHCSLPSVPEEILRYSRTLEELFLDANHIRDLPKNFFRLHRLRKLGLSDNEIVRLPPDIQNFENLVELDVSRNDIPDIPDDIKHLQNLQVADFSSNPIPKLPAGFSQLKNLTVLGLNDMSLTTLPVDFGSLTQLESLELRENLLKHLPESIRQLTKLKRLDLGDNEIEELPSYLGYLPGLHELWLDHNQLERLPPEIGLLTNLTYLDVSENRLEKLPNEIGGLVNLTDLDLAQNLLETLPDGIAKLSRLTILKLDQNRLQKLNPTIGCCESMQELILTENFLSELPASIGQMSKLSNLNVDRNALEYLPAEIGNCANLGVLSLRDNKLKRLPPELGNCSVLHVLDVSGNQLQYLPYSLVNLQLKAVWLSENQAQPLLTF…	73.79	0.0	gi|194745132|ref|XP_001955046.1|	GF16442 [Drosophila ananassae]	87.52	0.0	sp|Q7KRY7|LAP4_DROME	Protein lap4 OS=Drosophila melanogaster GN=scrib PE=1 SV=1	73.79	0.0
418	CL3333.Contig2_17	GJ22902 [Drosophila virilis]	133146.658805	0.006	1	1	CL3333.Contig1_17	1.09	0.646|1.524	0.385	1|1	0.508|0.474	1.04	0.941|1.137	0.019	1|1	0.947|0.899	1.03	0.761|1.308	0.150	1|1	0.733|0.709	1.03	1.202|0.853	0.061	1|1	0.778|0.767	1.02	0.953|1.087	0.009	1|1	0.961|0.932	1.03	1.345|0.719	0.196	1|1	0.636|0.606	CL3333.Contig2_17	PPLPERGPPNIKTSNLNLKFDTKNENKVESLKHLPLIVEQSVENTKAVKPVTLNLSTVQKSANTPTTPTTAIACSTIDRTPKSPLVDSDITPTGELMSRGSDSETEMTGTGQALTETELSDWTADDCISENFIDMEFVLNSNKGTIKRSKKEKRDMSAASKLPTTIELLGEVNKTAPVAEFEGILKSIDIDDIEFMDTGSEGSCAEGYSATNTALLRNRGYVEFIETTPKQTPTHKTMPHKSAGSNHKPVAAKRDEKSGIDYIEQGAYILQNDDHEHDLLKTPVNEEQHLVGSLAEKSQATGPPSLMTQSLTDSSTLNDLEDDSLFTATPNSQIQLSTGTTTKTTTEESEALTVVTSPLDTSSPKVGDVLNSTYILDKGAELTTGSTPSSSDKNPKTSQ…	54.94	0.0	gi|195391218|ref|XP_002054260.1|	GJ22902 [Drosophila virilis]	54.29	0.0	sp|Q86BA1|MICAL_DROME	Protein-methionine sulfoxide oxidase Mical OS=Drosophila melanogaster GN=Mical PE=1 SV=1	54.94	0.0
419	Unigene17998_17	GA13331 [Drosophila pseudoobscura pseudoobscura]	32922.07155	0.242	4	14	-	0.91	0.840|0.984	0.010	13|13	0.001|0.891	1.05	1.025|1.066	0.001	14|14	0.798|0.184	0.83	0.756|0.905	0.011	13|12	0.001|0.081	1.11	1.151|1.076	0.003	14|13	0.010|0.048	0.94	0.930|0.947	0.000	12|13	0.088|0.331	1.12	1.201|1.029	0.015	13|12	0.005|0.701	Unigene17998_17	AEAKDSDDEFHDALAEVSGIKEISISSEIVANEVSNTSHLKTNEELIDEITRQQKDLQLPDDDEENDDAEKKSDKVNTDEVLKPFCDDIDIEELRDREKGMSSEELQQNKQESDRMKLEANELFKTGDAIKAVELYTNALHICPTTCTKERAILYGNRAAAKINLDSKKSAIDDCTKAIELWPDYVRALMRRAKLCENEDRLEDALTDYQRVCELEPSQREAREAVSRLPEEIKERNERLKTEMLSKLKDLGNMFLKPFGLSTENFQMQQDSNTGSYSVNFQQNP	55.44	5e-73	gi|195152750|ref|XP_002017299.1|	GL22240 [Drosophila persimilis]	59.36	4e-60	sp|Q99614|TTC1_HUMAN	Tetratricopeptide repeat protein 1 OS=Homo sapiens GN=TTC1 PE=1 SV=1	55.44	2e-72
420	Unigene15916_17	GE11082 [Drosophila yakuba]	7955.773005	0.205	1	3	-	1.45	1.649|1.245	0.082	3|3	0.034|0.308	0.99	1.192|0.797	0.078	3|3	0.486|0.424	1.27	1.286|1.252	0.001	3|3	0.248|0.297	1.14	1.011|1.278	0.036	3|3	0.984|0.120	0.88	0.807|0.952	0.011	3|3	0.290|0.914	0.7	0.766|0.632	0.009	3|3	0.210|0.046	Unigene15916_17	TPAPGAYCPEKVRLDNTPAYTMAGKHDPKLNNDTPAPGDYCPEKVRLDHTPAYSMGGRHNLQKPSDTPAPGAY	79.45	2e-27	gi|195472969|ref|XP_002088770.1|	GE11082 [Drosophila yakuba]	-	-	-	-	79.45	1e-26
421	Unigene15479_17	GI12903 [Drosophila mojavensis]	63726.4942760001	0.020	1	1	-	0.84	0.858|0.826	0.001	1|1	0.844|0.798	1.18	0.992|1.369	0.071	1|1	0.993|0.688	0.69	0.774|0.606	0.014	1|1	0.755|0.415	1.26	1.405|1.111	0.043	1|1	0.541|0.859	0.94	0.979|0.901	0.003	1|1	0.985|0.911	1.38	1.117|1.643	0.138	1|1	0.882|0.429	Unigene15479_17	MYNSEDYGSADYYDDFGHTGDPQLDMEYERSYYASRMPDNVKFFLQNFCQAIKEGVLFDIQNMYENTFPQISDHHFDKSAWPDEQEVASIVDNDKVFLILYKELYYRHIHARIPGGPKLDQRINSFFNYCDFFNLIISSQNPVSLELPDIWLWELVDEFVYQFQNFAQYRARLTDKTQEEIQQLCVNHSNVWSILCILNVLHSLVDISNIKKQLEAISQGNDPQVVAGEFGELSFYKMLGYFSLVGLLRVHSLLGDYYQAIKVLEPIEIHKKSQYSHIPACQISTSYYVGFAYMMMRRYADAIRTFSEILLYIQRTKQLYSTRSYQNDQINKQAEQMYHLLAICLVLHPQCIDESIQQVLREKNYHDAMFKMQCGDLEVFKSFFIFACPRFVSPCPPAA…	92.94	0.0	gi|195125806|ref|XP_002007366.1|	GI12903 [Drosophila mojavensis]	92.94	0.0	sp|B4KZ45|EIF3L_DROMO	Eukaryotic translation initiation factor 3 subunit L OS=Drosophila mojavensis GN=GI12903 PE=3 SV=1	91.45	0.0
422	Unigene15186_17	GA18758 [Drosophila pseudoobscura pseudoobscura]	22744.652963	0.067	1	2	-	0.88	0.900|0.867	0.001	2|2	0.842|0.776	1.01	1.049|0.977	0.003	2|2	0.947|0.972	1.18	1.221|1.145	0.003	2|2	0.688|0.795	0.74	0.756|0.733	0.000	2|2	0.370|0.224	1.35	1.293|1.406	0.006	2|2	0.540|0.438	1.13	1.138|1.118	0.000	2|2	0.831|0.825	Unigene15186_17	MALISAFTKLTLQSSIRKISSTSVSRLQVTPILCAEPLKKKKKLDPQIIKQREDRRKKKLEKQIRRLEKNARQLKPIEELEIPLTLLDERDKRIRKVSPLSDADLEKRVLLTKQWAKYKHQEKVSDFQTIDRLLLSQSRALDELRKESEELYREAIQTDTTLLPIKIKGPVATPPIENYVSPDGDYIHEIKKWD	66.49	9e-52	gi|195500036|ref|XP_002097202.1|	GE26091 [Drosophila yakuba]	40.77	1e-15	sp|Q9Z2Q5|RM40_MOUSE	39S ribosomal protein L40, mitochondrial OS=Mus musculus GN=Mrpl40 PE=2 SV=2	66.49	3e-51
423	Unigene25518_17	1 231 LEN=231_ translated	9259.577438	0.077	1	4	-	0.88	0.710|1.049	0.057	4|4	0.249|0.835	1.14	1.043|1.242	0.020	4|4	0.904|0.279	1.14	1.506|0.783	0.261	4|3	0.037|0.259	0.96	1.380|0.534	0.358	3|3	0.229|0.001	1.51	0.984|2.034	0.551	3|4	0.964|0.002	1.2	1.253|1.155	0.005	3|4	0.310|0.458	Unigene25518_17	XYLFEVNIHKMEIKPVYWLGPTYEVRRAVWFLQLDGKFVPCEANLSQQIEYGYHKHRPWVAPPPPTLDASGKEIFEEX	-	-	-	-	43.10	2e-10	sp|P87109|YDK2_SCHPO	Probable phospholipase C20G8.02, mitochondrial OS=Schizosaccharomyces pombe (strain 972 / ATCC 24843) GN=SPAC20G8.02 PE=2 SV=1	63.93	9e-17
424	Unigene14870_17	125 1447 minus strand ubiquinol cytochrome c reductase subunit QCR2 [Glossina morsitans morsitans]	46342.1529350001	0.088	3	6	-	1.35	1.172|1.536	0.066	5|6	0.228|0.100	1.48	1.332|1.619	0.041	6|6	0.016|0.030	1.33	1.485|1.171	0.049	5|5	0.054|0.178	1.03	1.030|1.033	0.000	5|6	0.929|0.902	1.29	1.267|1.307	0.001	6|6	0.367|0.184	0.96	1.053|0.869	0.017	6|5	0.804|0.310	Unigene14870_17	MACNANRVPFLRSIAKRGLASQCPRPLGQAAEVQSTVLNSKLVVATAEASLPITRVSIVLRAGSRNECYETQGAAHLLRLAANLSTKHSSSFAIARNIQQVGGSLSASNDRELVTYTIETTSNQIETGLRYLQNLVQPAFKPWELTDNVPLLRNQLSSVSPQARVVELLHRAAFRSGLGNSIYIPKHQIGKLSSESLLHYVANTFTPSRCAVVGVGIDQNTLAGFAQNLDLASGSGKSDSACYYGGDARKDASGDVAHVAVAGQGGSLLNQKEALAFAVLKQAVGAGAATKRGNINGSLGKALQSAVPDVSVSYSTINASYEDAGLFGFLVSTDGQHIGKAVDALTRALKSGSVSSNDVNRGKALLKAAILESYSTDSSLINEIGVQAVHLKQVQSIDS…	64.63	9e-162	gi|198462879|ref|XP_002135397.1|	GA18004 [Drosophila pseudoobscura pseudoobscura]	36.92	1e-64	sp|P32551|QCR2_RAT	Cytochrome b-c1 complex subunit 2, mitochondrial OS=Rattus norvegicus GN=Uqcrc2 PE=1 SV=2	62.67	3e-163
425	Unigene15431_17	130 2037 heat shock protein 70 BD2 [Bactrocera dorsalis]	69858.405753	0.204	6	19	-	0.22	0.218|0.213	0.000	18|19	0.001|0.001	0.23	0.259|0.200	0.002	18|19	0.001|0.001	1.05	0.960|1.140	0.016	17|18	0.644|0.148	0.2	0.193|0.207	0.000	18|19	0.001|0.001	1.01	1.059|0.955	0.005	18|17	0.603|0.465	0.99	1.053|0.928	0.008	18|18	0.799|0.729	Unigene15431_17	MVAIGIDLGTTYSCVGVFQHGKVEIIANDQGNRTTPSYVAFTDSERLIGDAAKNQVAMNPRNTVFDAKRLIGRKYDDPKIMEDVKHWPFKVVSDGGKPKISVEYKGESKRFAPEEISSMVLTKMKETAEAYLGTTVTDAVITVPAYFNDSQRQATKDAGRIAGLNVLRIINEPTAAALAYGLDKNLKGERNVLIFDLGGGTFDVSILTIDEGSLFEVRATAGDTHLGGEDFDNRLVNHLAEEFKRKYKKDLRSNPRALRRLRTAAERAKRTLSSSTEATIEIDALFEGVDFYTKVSRARFEELCGDLFRQTLDPVEKALNDARMDKNQIHDIVLVGGSTRIPKVQSLLQSFFCGKSLNLSINPDEAVAYGAAVQAAILSGDKSSEIQDVLLVDVAPLSL…	96.86	0.0	gi|311797661|gb|ADQ12986.1|	heat shock protein 70 BD2 [Bactrocera dorsalis]	90.61	0.0	sp|P91902|HSP70_CERCA	Heat shock protein 70 OS=Ceratitis capitata PE=2 SV=1	96.86	0.0
426	CL2622.Contig1_17	GF18435 [Drosophila ananassae]	45340.881151	0.080	2	4	CL2622.Contig2_17	0.94	0.845|1.037	0.018	4|4	0.315|0.899	0.98	0.944|1.021	0.003	4|4	0.850|0.957	0.87	0.817|0.922	0.006	3|4	0.369|0.636	1.08	1.153|1.005	0.011	4|3	0.531|0.975	0.93	0.898|0.971	0.003	4|4	0.514|0.938	1.03	1.086|0.970	0.007	4|4	0.774|0.907	CL2622.Contig1_17	FVIYDEPSAIRHGGGVRRIPGRTLGGPRARRSNMHFSSSSGLSALSPSGRESVDPIAELLSQLSGVRRGGPQTSQLQQLQMQIQLERQQSSSSRQPLERLPRRAHPMVSSSNSNATMPEVISSGPLLSGSGSGGSGGSGVSGSGSLNGGGGSSCRTNEWTVNPSLTAQQQSQSGLTGSAGINNREVSGGGSGSVNGGSGSNASNILGMSISGGAVGAGVNSASNGADAQSQFLLTKFMQPTLSDTEWAEMERERSDRSQFVQALVLSTLSYDSLDTIAVGGGEVERDNRGESQETNSDNVNNEKVSTANTKSDSNARESLMNNNTDASAQTTNTSGSSSISAGTMLGSGRQQVHQQQQTSPEDIADEYKQQQQLQQQQSQQQTYASKKKSTSNTGVSGG…	47.69	1e-45	gi|195038073|ref|XP_001990485.1|	GH18223 [Drosophila grimshawi]	62.50	2e-11	sp|Q9P0J7|KCMF1_HUMAN	E3 ubiquitin-protein ligase KCMF1 OS=Homo sapiens GN=KCMF1 PE=1 SV=2	47.69	5e-45
427	Unigene14277_17	GJ20898 [Drosophila virilis]	5902.096055	0.222	1	2	-	0.67	0.655|0.681	0.000	2|2	0.264|0.292	0.87	1.012|0.724	0.041	2|2	0.991|0.507	0.72	0.741|0.690	0.001	2|2	0.496|0.333	0.94	0.986|0.884	0.005	2|2	0.982|0.727	0.94	0.758|1.131	0.070	2|2	0.495|0.850	1.26	1.422|1.096	0.053	2|2	0.337|0.872	Unigene14277_17	RIPFGKKHAEIATSFVSSAAGFGGAAGLALLYLTDWKLVLQYMPIYNTKFDKSE	88.89	7e-12	gi|195380838|ref|XP_002049168.1|	GJ20898 [Drosophila virilis]	-	-	-	-	88.89	3e-11
428	Unigene20846_17	GF20724 [Drosophila ananassae]	7728.962539	0.143	1	1	-	0.76	0.787|0.727	0.002	1|1	0.741|0.611	0.92	0.939|0.898	0.001	1|1	0.946|0.916	0.89	0.948|0.828	0.007	1|1	0.961|0.812	0.86	0.867|0.848	0.000	1|1	0.844|0.751	1.06	1.033|1.091	0.002	1|1	0.971|0.927	1.2	1.134|1.268	0.009	1|1	0.863|0.743	Unigene20846_17	MVIVEKSFPRGGATPKENKQKEGEENIIFGALQTKIKKPKKKPTDGEFNAGAEEESEQIQSVSAELLNYD	-	-	-	-	-	-	-	-	-	-
429	CL2326.Contig2_17	166 1122 minus strand annexin [Glossina morsitans morsitans]	35481.735568	0.103	2	2	-	1.57	1.699|1.441	0.033	2|2	0.158|0.320	1.29	1.287|1.296	0.000	2|2	0.571|0.626	1.13	0.896|1.369	0.112	2|2	0.925|0.424	1.5	1.157|1.844	0.236	2|2	0.759|0.137	0.94	1.082|0.800	0.040	2|2	0.903|0.674	0.85	0.873|0.822	0.001	2|2	0.822|0.700	CL2326.Contig2_17	MDYTPTPTVVPTARFDASADAQALRAAMKGFGTDEEEIIKILTARTNAQRQQIKAQFEIELGRDLIKDLKSELSGKFEDVILALMTTPVEYLCKQLHNAMAGMGTDEETLVEILCTKTNEEMQEIVATYEAVYDRPLAEQMCSETSGHFRRLLTLIVTGVRDPVGTVDAGKAHEDAEALYAAGEEKLGTDEEVFNRIMSHSSFAQLRLIFDEYKELSGQTIEQAIKHEMDGALHDAMIAIVECVQSPAAFFANRLYKAMNGAGTNDDTLIRIIVSRSEIDLANIKDEFERIYNRTLYSAVVSETSGDYKKALTALLGGA	77.19	2e-135	gi|125981875|ref|XP_001354941.1|	AnnX [Drosophila pseudoobscura pseudoobscura]	77.50	1e-135	sp|P22465|ANX10_DROME	Annexin-B10 OS=Drosophila melanogaster GN=AnnX PE=2 SV=2	77.12	5e-138
430	Unigene31755_17	1 273 LEN=330_ translated	10045.254751	0.110	1	17	-	0.66	0.745|0.576	0.014	15|15	0.001|0.001	0.3	0.334|0.261	0.003	15|16	0.001|0.001	0.67	0.704|0.644	0.002	15|15	0.001|0.001	0.99	0.896|1.074	0.016	16|17	0.018|0.187	0.32	0.344|0.291	0.001	17|16	0.000|0.000	0.43	0.422|0.430	0.000	16|15	0.001|0.001	Unigene31755_17	IDWRSIIELYILIAFASFTMNTKIAVIFAVFLLIAAVGFTQADWLDDLNEGTSQVVNAVNENAGKINKIATNIDVLGKILRNLDPDSNEEE	-	-	-	-	-	-	-	-	-	-
431	Unigene15553_17	GK15133 [Drosophila willistoni]	25697.764097	0.401	6	107	-	0.97	0.971|0.960	0.000	104|106	0.429|0.239	0.82	0.845|0.801	0.001	102|104	0.001|0.001	0.94	0.899|0.979	0.003	105|103	0.001|0.580	1.05	1.016|1.082	0.002	104|104	0.655|0.001	0.79	0.798|0.774	0.000	104|105	0.000|0.000	0.84	0.855|0.824	0.000	106|106	0.001|0.001	Unigene15553_17	MSTWLPLESNPDVLTKYIHKLGVSHEWSITDVVSLEPEMLEWIPQPVKAIILLFPISENYEKHRAQEQEHLAAHPGTFPNDLFYMRQLTSNACGTVAIIHSVANNKSISLCDGILKNFLDNAEGLTPEERGKALEDDKSFTEGHYELANQGQTVANPEEKVNHHFISIIHNGGVLYELDGRKQFPIKHGSTSDVTFVKDAAKICKCFMARDPEEMRFTVMALTGSQN	66.96	2e-88	gi|195433641|ref|XP_002064816.1|	GK15133 [Drosophila willistoni]	65.20	3e-85	sp|P35122|UCHL_DROME	Ubiquitin carboxyl-terminal hydrolase OS=Drosophila melanogaster GN=Uch PE=2 SV=2	65.20	4e-88
432	Unigene30769_17	GJ21419 [Drosophila virilis]	74069.7402289999	0.015	1	2	-	0.62	0.385|0.858	0.112	2|2	0.011|0.753	0.67	0.461|0.873	0.085	2|2	0.024|0.837	0.91	0.847|0.970	0.008	2|2	0.758|0.954	0.67	0.887|0.456	0.093	2|2	0.792|0.004	0.98	0.992|0.965	0.000	2|2	0.989|0.965	1.06	1.107|1.016	0.004	2|2	0.863|0.981	Unigene30769_17	LKKLSEESLLQPPEKVFDIMCKLGEGSYGSVYKALHKESSSIVAIKLVPVASDLHEIIKEISIMQQCDSPYVVRYYGSYFKQYDLWICMEYCGAGSVSDIMRLRKKTLTEDEIATILSDTLQGLVYLHLRRKIHRDIKAGNILLNTEGYAKLADFGVAGQLTDTMAKRNTVIGTPFWMAPEVIEEIGYDCVADIWSLGITALEMAEGKPPYGDIHPMRAIFMIPQKPPPSFREPDRWSAEFIDFVSLCLVKNPDERATASDLLNHEFIRNAKPRSILKRMIEETCAIREQQRANRTGGMSQAKSLATQQEELLQEDEPEFQAETVKTFIDDPGTLVPEKFDEYQQASGSDATMIAHTEDSGTLGPINRAMGLATSAENSGGRPGDVSVAADSGTLIELE…	74.06	0.0	gi|195431592|ref|XP_002063820.1|	GK15703 [Drosophila willistoni]	72.40	0.0	sp|Q8T0S6|HIPPO_DROME	Serine/threonine-protein kinase hippo OS=Drosophila melanogaster GN=hpo PE=1 SV=1	74.06	0.0
433	Unigene15070_17	GK14654 [Drosophila willistoni]	163590.114300999	0.006	1	1	-	0.89	0.764|1.021	0.033	1|1	0.700|0.988	0.95	0.973|0.921	0.001	1|1	0.982|0.935	1.02	0.928|1.117	0.018	1|1	0.940|0.895	0.87	0.918|0.819	0.005	1|1	0.907|0.689	1.09	1.007|1.170	0.013	1|1	0.993|0.857	1.06	1.225|0.891	0.056	1|1	0.780|0.879	Unigene15070_17	KKHNLTWELHEVLSKNYKEMKLLIIHPNRTIILTTSSEISSKYKINHRSKLELSKAAWIGYNLVIENSDDNSWGQFLAKLSYPKRNLVVNGSYLTTINSFNSNVSFAWSGGDNSGNNVVHTRFMWQTELLGPDDRDNQTISFNVGHYLLETDLTIMVNFYRGIKELIKFNLLVIYSNNLEHLIEINTSLTDLNNGAELTKYVVQFIANHRASELDVKFNASTTKRPYYFKIESNSLYKRDYFPKKIGLFLVLFDLNNKEIEYVKQSSYRTLRVWLQPILNYPAYGVNVALLNTPEDNTSGFICVNILDKYVQMYFNLTEDGSQNLRMLGNIPNSRHVYIDIWRNYEDITIVDVTSYIKLNHSRQVSGCLHWRPQTKKELKNKIFTIKEALLNSFTEYID…	48.63	0.0	gi|195116483|ref|XP_002002784.1|	GI11106 [Drosophila mojavensis]	24.48	2e-37	sp|Q9U943|APLP_LOCMI	Apolipophorins OS=Locusta migratoria PE=1 SV=2	48.63	0.0
434	Unigene29416_17	76 1029 fat body serine protease [Glossina morsitans morsitans]	36181.848612	0.028	1	6	-	0.83	0.876|0.786	0.004	6|6	0.210|0.029	0.96	0.960|0.955	0.000	5|6	0.884|0.823	0.71	0.716|0.708	0.000	6|6	0.036|0.006	1.22	1.122|1.324	0.020	6|5	0.296|0.004	0.82	0.866|0.764	0.005	6|6	0.114|0.025	1.13	1.026|1.232	0.021	6|4	0.904|0.233	Unigene29416_17	NDACATQHYHGICMRNSKCPHIREFMEALGLKSTDVEHCGYVVHEETICCPQKASLVRSSDRPAVQACEKLESRLITHGIIYDSKIQRRYPHMANIVYNISGHFCGGTLIEKNYVLTAAHCLQIPAAKAVQVILGAIDLKRFEEGHDGIGVEIKTIYIHENYSSFTKYDDIGLIELAKDVVYDANINPACLHTDSSELFNGTELIVTGWGRTEKHYRSTQLMMAKLMYIPLAQCNESYACYKDRRIPYGILDTQVCAFAPGRDICGGDSGGGLVTIDNDKYKVVGIVSANINCGANLPSIHTRVAKYLDFIEGIIWPN	34.23	9e-46	gi|194892473|ref|XP_001977668.1|	GG18119 [Drosophila erecta]	33.42	6e-44	sp|Q9VWU1|PSH_DROME	Serine protease persephone OS=Drosophila melanogaster GN=psh PE=1 SV=1	36.94	4e-54
435	Unigene7474_17	GI12848 [Drosophila mojavensis]	87510.886519	0.012	1	1	-	1.3	1.339|1.256	0.003	1|1	0.683|0.746	1.19	1.203|1.181	0.000	1|1	0.786|0.863	1.71	1.858|1.564	0.043	1|1	0.356|0.479	0.77	0.803|0.738	0.002	1|1	0.732|0.485	1.51	1.416|1.599	0.017	1|1	0.596|0.472	0.92	0.927|0.909	0.000	1|1	0.919|0.906	Unigene7474_17	MAGQKFQYDESGGTFYYFLLSFLALILVPTTIYYWPRKKKEDVNKLKEECLCQDCIKKKAILAAAEPYRMLKSLLIKLCLVFGWALLVLLAYRVSQFDYEMASFDPFEILQLPPTASMEEIKKTYRELSRVLHPDKPTGDEKSFMMLRKAYQALTDETAKQNYEKYGNPDGPGAMSFGIALPSWIVEKENSVWVLGLYGLIFMVALPSVVGMWWYRSIRFSGDKVLLDTSQMYFYFIHKTPHMLLKRALMILAASLEFDKRHNSQVVERQSDNEEVPALIRQLPNLNEKCKEHPLCRMYSIKARAILHAHLSRIPLNPETLEKDRQFIVKKCPYLIQEMVSCVHQLVMLAYARRVPRLPSIETIENCMKMSPMIIQGLWDYKSPLLQLPHLTEDQHLYY…	79.58	0.0	gi|195125627|ref|XP_002007279.1|	GI12848 [Drosophila mojavensis]	48.67	2e-126	sp|Q8VHE0|SEC63_MOUSE	Translocation protein SEC63 homolog OS=Mus musculus GN=Sec63 PE=1 SV=4	79.58	0.0
436	CL1402.Contig1_17	GE20262 [Drosophila yakuba]	7365.902526	0.344	1	2	CL1402.Contig2_17	1.22	1.289|1.141	0.011	2|2	0.570|0.798	1	1.108|0.887	0.024	2|2	0.852|0.863	1.86	2.509|1.213	0.840	2|2	0.117|0.677	0.76	0.951|0.559	0.077	2|2	0.930|0.161	1.38	0.940|1.824	0.391	2|2	0.926|0.199	0.83	0.901|0.766	0.009	2|2	0.861|0.548	CL1402.Contig1_17	QHKDVSGLEKEIASGQVEELIMQAENELILARKMLGWKPWESLVKPPPQKQWNWPPAKISKPMI	79.55	2e-13	gi|194868501|ref|XP_001972301.1|	GG13964 [Drosophila erecta]	65.85	1e-08	sp|P23935|NDUA5_BOVIN	NADH dehydrogenase [ubiquinone] 1 alpha subcomplex subunit 5 OS=Bos taurus GN=NDUFA5 PE=1 SV=3	79.55	8e-13
437	Unigene32342_17	GK18032 [Drosophila willistoni]	91512.241609	0.061	3	3	-	1.22	1.226|1.213	0.000	3|3	0.649|0.455	1.07	1.004|1.131	0.008	3|3	0.994|0.732	1.41	1.547|1.267	0.039	3|3	0.091|0.272	0.89	0.971|0.812	0.013	3|3	0.933|0.182	1.18	1.145|1.223	0.003	3|3	0.549|0.438	0.88	0.846|0.905	0.002	3|3	0.545|0.727	Unigene32342_17	MELIQKHLSKIRVPCDNTPIYKDECVYSFDTPETLTGLYVSLSSFLSFGEQYVKKYAEKTGNAVFLHIHRVKTPKKGVAAAEEGGPERKITRLAIGVEGGYNDANEKRYDIKDTYSIVVMPNIDKKIPFPDEQLPLLVTQSVEALLAQESAIAKLEKQTLTGTWDGEVRQVSKYAESLIQLDNGKKIPPSGWKCEKCDLTNNLWLNLTDGSILCGRKFFDGSGGNDHAVEYYREMGYPLAVKLGTITADGKSDVFSYPEDDMVIDTNLEKHLAHFGINMAAMKKSEKSMVELELEINQRIGEWSLLTESDSELQPLAGPGYTGMRNLGNSCYINSVMQVIFTLPDFIKRYVGEGAEKYFNVFPADPASDFNIQMAKLGNGLWSGKYSSISENSLDSEST…	72.14	0.0	gi|195125143|ref|XP_002007042.1|	GI12716 [Drosophila mojavensis]	48.89	0.0	sp|P45974|UBP5_HUMAN	Ubiquitin carboxyl-terminal hydrolase 5 OS=Homo sapiens GN=USP5 PE=1 SV=2	72.14	0.0
438	Unigene14503_17	GJ20808 [Drosophila virilis]	50903.748139	0.025	1	1	-	2.67	3.490|1.846	1.351	1|1	0.074|0.280	1.94	1.970|1.919	0.001	1|1	0.251|0.368	3.51	4.121|2.903	0.742	1|1	0.061|0.095	0.77	0.610|0.920	0.048	1|1	0.385|0.884	2.4	2.535|2.255	0.039	1|1	0.154|0.230	0.84	0.757|0.914	0.012	1|1	0.658|0.915	Unigene14503_17	DVVLYSVLGVILLENIFDIYITYRQIRVYRTALKVPRELKDCMNDETFQKARLYGLDRASYSVFSAIIKDVILMCIELYTGFIAVQWAWAIDLAKLLHLNADSEIIVSCLFGLITSVIGTFKDLPFKIYSVFVLEEKHGFNKQTGGFFAWDQVKGFLVTQILMVPIISATVWIVQNGGDQFFIWLWLFTGITSLVLLIIYPIFIAPLFDKYTPLEQGPLRKSIEDLAAMLKFPLTKLYVVEGSKRSSHSNAYFYGLWNSKRIVLFDTLLLNKGKPDNAELKEEDKGKGCTNEEVLAVLGHELGHWKCGHVTKNIIIAQVHLLLLFVVFGYCFTYGPFYEAVGFQPGTRPIIVGLLIVFTYVMAPYNAIVNFAMTTLSRYFEYQADEFAHGLGFSKQLGQ…	73.14	0.0	gi|195124435|ref|XP_002006698.1|	GI21207 [Drosophila mojavensis]	46.37	1e-112	sp|Q80W54|FACE1_MOUSE	CAAX prenyl protease 1 homolog OS=Mus musculus GN=Zmpste24 PE=1 SV=2	73.14	0.0
439	Unigene7367_17	GH19375 [Drosophila grimshawi]	16831.316429	0.059	1	1	-	0.89	0.882|0.901	0.000	1|1	0.878|0.901	1.04	0.970|1.119	0.011	1|1	0.980|0.913	0.83	0.760|0.903	0.010	1|1	0.732|0.899	1.08	1.006|1.158	0.012	1|1	0.996|0.792	0.98	1.105|0.845	0.034	1|1	0.916|0.843	1.15	1.072|1.231	0.013	1|1	0.924|0.772	Unigene7367_17	MSTSNNDNGNLMDEFEEAFQACLLSLTKPEPNTGTNKDEIELEVQKTTNRFIDVARQMEAFFLQKRFLVSTLKPDMLIKDENQDLRNEIARKEQLLNKHYSRLEEWKACLSDIQANQGAHNRSIGGIGGTVAAISDSSGAGTTGMIGIPGPG	84.80	7e-54	gi|195038053|ref|XP_001990475.1|	GH19375 [Drosophila grimshawi]	80.31	1e-53	sp|Q294G7|MED28_DROPS	Mediator of RNA polymerase II transcription subunit 28 OS=Drosophila pseudoobscura pseudoobscura GN=MED28 PE=3 SV=1	84.80	3e-53
440	CL859.Contig1_17	GL10676 [Drosophila persimilis]	155153.241843	0.006	1	1	CL859.Contig2_17	0.99	0.900|1.073	0.015	1|1	0.901|0.936	1.05	1.041|1.062	0.000	1|1	0.972|0.950	1.12	0.985|1.263	0.039	1|1	0.991|0.759	0.88	0.851|0.902	0.001	1|1	0.789|0.860	1.19	1.248|1.139	0.006	1|1	0.770|0.885	1.05	1.129|0.973	0.012	1|1	0.867|0.977	CL859.Contig1_17	QAPQQQLQQQHQHALNVAAASGFGGISVGGTNATTAAQAAAAAAAAAAALGQLSGPAAAAALSASGLGMGAPMGLPGLGGLGALGGVGGLGNPSGRLDAHGLGATTLSATPSNSRDSSTDRVEVIKLPPTITSNGAYNLSNKNKDLLDLTGDNSSGAGVNLSMKSSTSTATTNATTASSALIGTAANPIMIEDYDAPLNLSMKPADKQSSSACMSSSMVGGSSDYNSPVNMGGTVAVPAGSGGSNSLQSLTSITAALGGGSTTPLPGSGASSSTGNAGSSGSAGSSGGGGSGGSSGERSGQPPFKEGRPRNLGRGVSKPKKNTVASLLAQSRAVGIKPMLATQQLLQQGADLEKIRQALNEANAQLDLSTDSESVAAESGLSESESEDANILSVTELRV…	77.75	0.0	gi|195123885|ref|XP_002006432.1|	GI21040 [Drosophila mojavensis]	30.38	2e-48	sp|Q9UIF8|BAZ2B_HUMAN	Bromodomain adjacent to zinc finger domain protein 2B OS=Homo sapiens GN=BAZ2B PE=1 SV=3	77.75	0.0
441	Unigene6610_17	GI21978 [Drosophila mojavensis]	19290.96896	0.154	2	2	-	0.99	1.022|0.957	0.002	2|2	0.969|0.941	1.45	1.480|1.424	0.002	2|2	0.276|0.678	0.93	0.888|0.964	0.003	2|2	0.845|0.946	1.07	0.995|1.138	0.010	2|2	0.993|0.712	1.37	1.425|1.312	0.006	2|2	0.598|0.571	1.43	1.406|1.454	0.001	2|2	0.363|0.548	Unigene6610_17	MNSSGITPDIIDTSPKALVQLTYPSGAKVEPGKELTPTQVKDQPIASWEAEDDALYTLFMVDPDAPSRAEPTYREILHWLVINIPGNKVAKGQTLAEYIGSGPPEGTGLHRYVFLVFKQGGKIESTKFISKTSREGRVSVKTRDFIAKYNLGDPIAGNFYQAQYDDYVPILKAQL	71.43	1e-71	gi|195113755|ref|XP_002001433.1|	GI21978 [Drosophila mojavensis]	55.49	3e-51	sp|O16264|PEBPH_CAEEL	Phosphatidylethanolamine-binding protein homolog F40A3.3 OS=Caenorhabditis elegans GN=F40A3.3 PE=2 SV=1	71.43	4e-71
442	Unigene6545_17	GH22629 [Drosophila grimshawi]	29211.299258	0.079	2	3	-	2.25	2.505|1.992	0.132	3|3	0.105|0.077	0.98	1.056|0.908	0.011	3|3	0.910|0.814	1.9	1.619|2.185	0.160	3|3	0.039|0.007	1.24	0.930|1.548	0.191	3|3	0.800|0.456	0.85	0.976|0.716	0.034	3|3	0.950|0.145	0.46	0.483|0.440	0.001	3|3	0.002|0.004	Unigene6545_17	HQRQFAINVKELEQSLVDFRAKYYARLDVIGYNIELLETKLEEVDNKLNPLVLLDDINDYCVHKYRAKLPQIAQLIVKMKECTLKGNNAYSGFVSGAEATVRNLKSYYTSNFAAAVNDCKKKHAGHFTESNYTQCISTAVMNAATKTYADTNVFENQMKAAECNAAMKIHEVFDCYNLQIFSTFKTIGEVMGLVENCIAGQEFCPTCGDDTALTKGRCPYHMSWHLADSDLLSEKINNPFKGITKTTPCLQVNF	32.68	2e-32	gi|195058383|ref|XP_001995441.1|	GH22629 [Drosophila grimshawi]	-	-	-	-	32.68	8e-32
443	CL1733.Contig1_17	165 1511 minus strand succinyl-CoA synthetase beta subunit [Glossina morsitans morsitans]	49016.518265	0.098	3	4	-	1.31	1.482|1.137	0.060	4|3	0.151|0.587	1.07	1.174|0.973	0.020	4|3	0.746|0.951	1.4	1.255|1.535	0.039	3|4	0.304|0.224	0.86	0.793|0.925	0.009	3|4	0.223|0.733	1.12	1.283|0.948	0.056	4|3	0.517|0.908	0.8	0.772|0.831	0.002	3|4	0.229|0.267	CL1733.Contig1_17	MAALLARTGILNEIVNPKVGQKILALGSSGSLQKRNLNVQEHVSYTLLNEAGIPTPKFGVAKSGQEAKEIAQKLDTNNLVLKAQVLAGGRGVGHFKNGLKGGVRVVNTPTEAQEIANKMVNQLLVTKQTGAAGRICNSVMVAERKFPRREFYFAVMMERAFNGPVIIASSQGGVNIEEVAADNPDAIIYEPIDIKVGLTPDQAGKVVNSVGLGEFQEETVKMLMNMYQLFVKKDALLIEINPYAEDALEGFFALDAKFRFDDNAEFRQKELFALRDWTQEDPKEVEAAKYDLNYIALDGTIGCMVNGAGLAMATMDIIKLYGGDPANFLDVGGGATAQAVKEAFKIITADPKVHCILVNIFGGIMRCDVIAEGIIAAAKDLNMKMPIVVRLQGTNVNEA…	78.49	0.0	gi|194903565|ref|XP_001980893.1|	GG13653 [Drosophila erecta]	56.38	9e-142	sp|Q9Z2I9|SUCB1_MOUSE	Succinyl-CoA ligase [ADP-forming] subunit beta, mitochondrial OS=Mus musculus GN=Sucla2 PE=1 SV=2	83.19	0.0
444	Unigene15314_17	GJ14509 [Drosophila virilis]	113267.672339	0.047	3	5	-	1.39	1.452|1.337	0.007	5|5	0.011|0.095	0.99	1.070|0.901	0.014	5|4	0.779|0.695	1.53	1.535|1.518	0.000	5|5	0.006|0.006	0.93	0.888|0.979	0.004	3|5	0.606|0.917	1.01	1.022|0.997	0.000	4|4	0.942|0.995	0.76	0.797|0.732	0.002	5|5	0.080|0.044	Unigene15314_17	MTLTSAAGIISLLDEPMPDLKVFALKKLDNIVDEFWPEISESIEKIEMLHEDRSFPENKLAGMVASKVFYHLGSFEDALTYALGAGDLFDVNSRNEYTETIIAKCIDFYIAQRIVFIENPKEAKAVDIRLEAIVNRMIQRCLDDGQYRQALGIALETRRMDIFEQSIMKSDDVAGMLAYAYNVTMSLIQNRGFRNEVLRCLVGLYHDLGVPDYVNMCQCLIFLEDPLAVAEVLDKLTRSSVEGNNLMAYQIAFDLYESATQEFLGKVLQALKETAPIPTALPSTFKPQGTNPTNGEDSSKTSSDDKPKSEDSAGDAEGDVKIERTIDSLNDSEKAHQKNIEKLISILSGEVTIDLQLQFLIRSNHGDLQILRGTKEAVRVSICHTATVIANAFMHAGTT…	91.36	0.0	gi|195399966|ref|XP_002058590.1|	GJ14509 [Drosophila virilis]	90.74	0.0	sp|Q9V3P6|PSMD1_DROME	26S proteasome non-ATPase regulatory subunit 1 OS=Drosophila melanogaster GN=Rpn2 PE=1 SV=1	91.78	0.0
445	Unigene31926_17	GK18266 [Drosophila willistoni]	23578.324833	0.034	1	1	-	0.94	0.905|0.982	0.003	1|1	0.908|0.990	1.06	1.155|0.963	0.018	1|1	0.835|0.970	1.16	1.100|1.221	0.007	1|1	0.926|0.799	0.81	0.802|0.822	0.000	1|1	0.713|0.697	1.29	1.193|1.387	0.019	1|1	0.820|0.633	1.11	1.241|0.970	0.037	1|1	0.764|0.977	Unigene31926_17	HGHSHSFGQDCGHEATDVDHALEMGIEYSLFKKIDMDNLECLNEECEGTGKKVFKAYENRLNHTDFVQSDADEELLFNIPFTGNIKLKGIIIVGANDNTHPNKVRLFKNRPKMAFDEARSKADQEFELTRDPRGEIEYSPKVVTFSSVHHLSLHFPSNFGDEATRIYYIGLRGEFSESHYHGVTICTYEARPNVSDHRNEAYDAV	80.00	3e-95	gi|195436917|ref|XP_002066392.1|	GK18266 [Drosophila willistoni]	78.54	1e-93	sp|Q29L80|PITH1_DROPS	PITH domain-containing protein GA19395 OS=Drosophila pseudoobscura pseudoobscura GN=GA19395 PE=3 SV=1	80.00	1e-94
446	Unigene15920_17	GF23556 [Drosophila ananassae]	54727.9480660001	0.046	2	2	-	0.82	0.601|1.043	0.098	2|2	0.737|0.963	0.77	0.747|0.784	0.001	2|2	0.534|0.793	1.54	1.044|2.030	0.486	2|2	0.974|0.055	0.53	0.451|0.616	0.014	2|2	0.202|0.248	1.31	1.487|1.130	0.064	2|2	0.267|0.851	0.92	1.078|0.758	0.051	2|2	0.895|0.557	Unigene15920_17	FRNGRYDDGFLGEPSKFESLRRKPEPEDKWFEQKLDHFGGKSKELTWKQRYFVNDEFYRNDSTAPVFLMIGGEGEASKRWMSEGAWIKYAEHFGALCFQLEHRFYGKSHPTSDLSTKNLVYLTSEQALSDLANFIRSMKKQYNTNDSQKWIVFGGSYPGSLAAWAREKFPDLIHGAISSSGPLLAKVDFKEYFEVVKASLATYSTDCLEAVGRAFIQVEILTRHMIGQRNLDDKFKTCTPIKDSINNPLDMSNFFESLAGNFAGVVQYNKDNRPSATYTIDDLCNVMVNTTIGPPVARLGVVNDLLLSEAKEKCLDYKYDKMIAELKETSWDAKACNGSRQWTYQTCNEFGFYQTSNNKSDTFGERFAVDFFIKQCMDIYSESMDPKYLEQVVSQTNKN…	74.79	0.0	gi|194752101|ref|XP_001958361.1|	GF23556 [Drosophila ananassae]	37.09	6e-78	sp|P90893|YM9I_CAEEL	Putative serine protease F56F10.1 OS=Caenorhabditis elegans GN=F56F10.1 PE=1 SV=2	74.79	0.0
447	Unigene16853_17	GK10744 [Drosophila willistoni]	54342.628021	0.204	6	26	-	0.82	0.821|0.810	0.000	26|26	0.001|0.001	0.68	0.685|0.682	0.000	25|26	0.001|0.001	0.88	0.907|0.853	0.001	25|25	0.058|0.001	0.93	0.945|0.920	0.000	23|24	0.059|0.028	0.74	0.754|0.735	0.000	26|21	0.000|0.000	0.81	0.805|0.813	0.000	26|24	0.001|0.001	Unigene16853_17	PNILLILSDDQDLTLEGMTPMRQVQKLIAKAGGQFSHAYTSSPLCCPSRASLLSGMYAHNHGTINNTVNGGCNGHHWRTQIEPRALPVLLQNDGGYETFFAGKYLNQFNGERLPPGWTQFYGLHGNSRYYNYTLRENERNVSYTDTYLTDLLRDKVLGFLKTRNKQQPFFAMVAPPAPHAPYTPAERHCGAFANVKALRTPNFNRVPFPQEKHWLVAETRPIPNETLKLLDSYYRQRWETLLAVDEMVAAIIQALEDQFQLDNTYIIYTSDNGYHMGQNAQPWDKRQPYETDIRVPLLLRGPGIPQGAVLPQPTLLLDLMPTILHWTALHAQTTLDGVPIQAALQHRSDGKQLKEYRRSILIQHWGEGNADTYNPDCPWSPKDHLSQCTPEADCHCQDA…	59.92	5e-164	gi|195425576|ref|XP_002061073.1|	GK10744 [Drosophila willistoni]	43.98	2e-104	sp|Q8BFR4|GNS_MOUSE	N-acetylglucosamine-6-sulfatase OS=Mus musculus GN=Gns PE=2 SV=1	59.92	2e-163
448	CL906.Contig2_17	51 569 calponin [Glossina morsitans morsitans]	19456.714142	0.549	6	37	CL906.Contig1_17	0.84	0.853|0.820	0.001	37|37	0.001|0.001	0.94	0.966|0.909	0.002	37|37	0.418|0.084	1.01	1.054|0.968	0.004	37|37	0.618|0.771	0.82	0.843|0.794	0.001	37|36	0.002|0.001	1.15	1.094|1.202	0.006	36|36	0.025|0.000	1.1	1.103|1.105	0.000	37|37	0.137|0.244	CL906.Contig2_17	QNKINSKYSEELAQECLEWIKIVTGEPINTAGDMDNFFEVLKDGVLLCKLANALQPGSIKKVNESKMAFKCMENISAFLACAKNFGVPTQETFQSVDLWERQNLNSVVICLQSLGRKAHNFGKPSIGPKEADKNVRNFSEEQLRAGQNVISLQYGSNKGANQSGINFGNTRHM	93.64	3e-91	gi|195135529|ref|XP_002012185.1|	GI16831 [Drosophila mojavensis]	47.75	1e-40	sp|Q24799|MYPH_ECHGR	Myophilin OS=Echinococcus granulosus PE=2 SV=1	92.49	5e-91
449	CL895.Contig1_17	GK11166 [Drosophila willistoni]	33103.176749	0.084	2	2	-	1.44	1.501|1.373	0.008	2|2	0.272|0.407	1.32	1.337|1.306	0.000	2|2	0.482|0.588	1.3	1.401|1.205	0.019	2|2	0.421|0.720	1.12	1.168|1.062	0.006	2|2	0.709|0.878	1.19	1.127|1.256	0.008	2|2	0.832|0.653	0.91	0.897|0.928	0.000	2|2	0.856|0.893	CL895.Contig1_17	MMMQRANILIPVAIEATLQSQPQRGMATLKSISIRLKSVKNIQKITQSMKMVSAAKYSRAERDLKAARPYGVGAQQFFEKTEIQSEDKTEPKKLLIAMTSDRGLCGAVHTGVARYIRNELAKDDSNTKLFCVGDKSRSILSRTYGKNILMVANEIGRLPPTFLDASKIAHEVIKTGYEFTEGQIVYNKFKSVVSYQLSTLPVYNAPTVEKSEKLSLYDSLDSEIVQSYLEYSLASLIFYTMKEGACSEQSSRMTAMDNASKNAGEMIEKLTLTFNRTRQAVITRELIEIISGAAAL	86.82	7e-154	gi|195445138|ref|XP_002070190.1|	GK11166 [Drosophila willistoni]	84.12	5e-150	sp|O01666|ATPG_DROME	ATP synthase subunit gamma, mitochondrial OS=Drosophila melanogaster GN=ATPsyn-gamma PE=2 SV=2	86.82	2e-153
450	CL2479.Contig1_17	GH24128 [Drosophila grimshawi]	128415.40954	0.009	1	2	CL2479.Contig2_17	0.88	0.783|0.980	0.019	2|2	0.580|0.979	0.85	0.875|0.826	0.001	2|2	0.804|0.738	1.05	0.914|1.185	0.037	2|2	0.892|0.727	0.84	0.825|0.857	0.001	2|2	0.625|0.636	1	1.004|1.004	0.000	2|2	0.993|0.996	0.96	1.077|0.839	0.028	2|2	0.896|0.722	CL2479.Contig1_17	RTRRDRGGDYDTIERRHRGGGDKSMRGERVERGDLREYEEYRKQSSRNARESDLEKERARYDPRHAAMYGYPPGAYGYDPYASYYYEQMARTNPQAYSEWYKKYYGHAAAATASSLSAHAAASGDHASLNSSSLAAATADGRESVHSGRSSVQNDNDRSGHLSLRDAEAIAEPDPQRLTPRKFVNEHSIVSISAGILVTVKPKYTSHGTISNIVKLQPLGANDATRQLFQAYPGPLVRGITHKKTIIEFCEEQIRLGPMETTIYAKQLVCNNIEKYRGSYTLMWNLLILLLRQNGMVVGTDIAELLLKNQQQFSYQIEHADGDDSSALSGDEEDEQQASATDPAAAEQNNTEHVSDNEAEAVANTTKQLPKSTTTISNAPVLTDDEITEKFRNYLLYGN…	42.76	2e-165	gi|60677997|gb|AAX33505.1|	LP14866p [Drosophila melanogaster]	37.21	1e-84	sp|O15027|SC16A_HUMAN	Protein transport protein Sec16A OS=Homo sapiens GN=SEC16A PE=1 SV=3	42.76	7e-165
451	Unigene6386_17	GK20780 [Drosophila willistoni]	143436.183742999	0.006	1	1	-	0.86	0.738|0.973	0.028	1|1	0.665|0.981	0.9	0.859|0.947	0.004	1|1	0.827|0.957	0.83	0.786|0.870	0.004	1|1	0.770|0.866	1.03	1.132|0.934	0.020	1|1	0.856|0.907	0.88	0.848|0.908	0.002	1|1	0.837|0.917	1.04	1.118|0.964	0.012	1|1	0.881|0.970	Unigene6386_17	SAANGIVEDEKSYYKNNIILAESFAENEKDTKAIMQISKGEPQENPTETKKKKKKGDDDKGDNQKDDVEPVAFFKMFRYSTTKDKLLYCLGFLCAIATGLTTPANSLIFGNLANSMIGFASPGNYTRSTADDALLDAVETFAFQNCIIGIIMLTCSYISITTFNYAANAQILRIRGKFIRSILHQDMSWYDFNQSGEVASRMNEDLSKMEDGIAEKDVMFVHFIVAFIGSLTLAFYKGWELSLVCLSSLPATFIALGLVAIATSKLSRKELNVYAAAGNIAEEALSGVRTVKTFEGEYKEVQAYKSQIVDARKINIKRNMFSGMGFGLLWFFIYASYALAFWYGVGLVLKNYDKIPGYGNYDPGNMITIFFSVMMGSMNIGMASPYIEAFGIAKGACAK…	69.92	0.0	gi|195426421|ref|XP_002061333.1|	GK20780 [Drosophila willistoni]	46.45	0.0	sp|P21447|MDR1A_MOUSE	Multidrug resistance protein 1A OS=Mus musculus GN=Abcb1a PE=1 SV=3	69.92	0.0
452	Unigene29716_17	GD16075 [Drosophila simulans]	43569.5942540001	0.063	2	4	-	0.87	0.883|0.848	0.001	4|3	0.695|0.454	1.01	1.091|0.930	0.013	4|3	0.847|0.874	0.9	0.896|0.901	0.000	4|4	0.548|0.514	1.04	1.059|1.024	0.001	4|4	0.800|0.943	1.09	1.076|1.101	0.000	4|4	0.885|0.734	1.21	1.191|1.220	0.000	4|4	0.316|0.368	Unigene29716_17	TAKNIPRRQAIPVLYTRGTHYDVGFDMGRTFASIIKSFLQLCNPLNESYLPLYNKDEGRKVYNKTLESVKKSFPQYIRELEGIADGAQVEFHKLFLLHMDEITAICANGNEAVAPIGCSSIIVNNENSRILAHTEDALAATLNHYYFVVAHIISDTPQGKHKVKEERFMSLCYAGHLPGYTMSYNHHGLVFTINTLSALHLRSGKTPRHFITRALLSAENYEQALAVLKDESVGAGDGCSINMSFINEEPRKFYNIEMAPVLEDGTESRLDIKEICCGDHNCHANRYERLCTKEANPWLLASSKSRMNTFAEYPPPSCKEDVVKMLGDCSGGEYCVFNENNSSDELVKTIAVGVFDLIEKTIALYSDNPSKTEPQCVLPLILK	65.45	2e-148	gi|195356369|ref|XP_002044646.1|	GM22371 [Drosophila sechellia]	-	-	-	-	65.45	7e-148
453	Unigene14723_17	89 892 minus strand NGG1-interacting factor 3 protein NIF3L1 [Glossina morsitans morsitans]	29552.167169	0.119	3	17	-	1.49	1.513|1.473	0.001	17|15	0.001|0.001	1.32	1.227|1.403	0.015	15|17	0.001|0.001	1.63	1.668|1.585	0.003	17|17	0.001|0.001	0.93	0.965|0.904	0.002	17|17	0.759|0.131	1.43	1.419|1.431	0.000	17|15	0.000|0.000	0.87	0.839|0.909	0.002	16|16	0.013|0.126	Unigene14723_17	MPRGRTLQNVVSELEKFAPLNLAEKWDNVGLLIEPYKARQIRNILLTNDLTESVMQEAVGQGTDLIVAYHPPIFAPLNRITQKNWKERIVSKCLAEGIALYSPHTAWDATPGGVNDWLSSALPCVDMQPIQPNPLGGEFGGVGRTFTTALTLGQAVASVQRHIGLDVHLSMGINHNLETPITVVAVCAGSGSTVLKGVGAELYITGEMSHHDLLDASHQNISVILCNHSNSERGFLRKFETKLYDMLKGDCEVTISEKDKDPLKTIVK	59.47	2e-88	gi|194759836|ref|XP_001962153.1|	GF14582 [Drosophila ananassae]	55.68	9e-83	sp|Q9NK57|NIF3L_DROME	NIF3-like protein 1 OS=Drosophila melanogaster GN=anon-35F/36A PE=2 SV=3	62.96	3e-97
454	CL3181.Contig1_17	697 1710 minus strand fat body serine protease [Glossina morsitans morsitans]	37695.707246	0.041	1	2	-	0.95	0.937|0.955	0.000	2|2	0.915|0.939	0.77	0.773|0.771	0.000	2|2	0.560|0.597	0.75	0.766|0.736	0.000	2|2	0.554|0.437	1.26	1.319|1.205	0.006	2|2	0.369|0.536	0.62	0.600|0.634	0.001	2|2	0.139|0.247	0.81	0.817|0.804	0.000	2|2	0.675|0.624	CL3181.Contig1_17	EQCQVKKYKGTCTEASKCTDLPDAMAQLGLKRRDISRCGFTIFEEIICCPSLSVPTTTIKTRSDDRPAVKACIEIDEQLQPLLTPHILGGTPVEIGEYPHMVAIGLTDTDGAVEYNCGGTLIAKHYVLTAAHCLVTRQIPVMVRMGVVNFTDTEQMKGAVEIKIKKVHLHPDYTSANVYNDVGLLELEEEVTYSNNVFPTCLYTDPDDPPTNSVLYVTGWGVINRSTREKSDVLLKARQTIVDNSKCNESYVDNGLTRRNREGIIASQLCAHDPGLTKDACQGDSGGPLNLVVDEALNKYRVVGVISAGFSCGSSTPGLYSRVSAFLDWIESIVWPSG	43.43	3e-74	gi|24643043|ref|NP_573296.2|	CG6361, isoform A [Drosophila melanogaster]	42.18	1e-69	sp|Q9VWU1|PSH_DROME	Serine protease persephone OS=Drosophila melanogaster GN=psh PE=1 SV=1	44.72	1e-87
455	Unigene29640_17	GH15109 [Drosophila grimshawi]	72318.7879620001	0.036	1	2	-	1.72	1.846|1.600	0.030	2|2	0.121|0.180	2.17	1.377|2.961	1.255	2|2	0.415|0.041	1.88	2.151|1.606	0.149	2|2	0.060|0.193	1.1	1.229|0.980	0.031	2|2	0.735|0.955	1.61	1.721|1.497	0.025	2|2	0.116|0.324	1.06	0.958|1.161	0.021	2|2	0.942|0.787	Unigene29640_17	RYVIEKTNKSPMLLNQHEVVRLEEDLIVTVGILPEHFLYCVIDSQVLKESKIYAADLVRKVDEIIEVQPQGDSPLSVKDLIKLPAFDDIVVNLVDELKMNLCLDSKNAILRQGNILIAGASGSGKTVVVERILNELVKKPYFCFFDIFYCSRSKGRKAESIQKDLRSIFTTCLQNAPSIVVLENLDVLAHSAGDQTTQDGEYYNRIADTVHQLIVQYTSNNPISVLSTISELEALNKRLYSPRGRHLFQNVTKLPSLEREGRELILQELCSHIESEKLDLCKFANLTEGYNKGDLVQFVERAIFYAYRISKTHPILTNELLIDSLANTNSYCLQGIENHQKVKDDDNLEELAVQEVPGLEPVVSVLEEVLMWPTRFPNIFQKSPLRNQAGVLLYGPPGT…	76.76	0.0	gi|195015717|ref|XP_001984259.1|	GH15109 [Drosophila grimshawi]	38.87	1e-82	sp|O43933|PEX1_HUMAN	Peroxisome biogenesis factor 1 OS=Homo sapiens GN=PEX1 PE=1 SV=1	76.76	0.0
456	Unigene13785_17	GI19343 [Drosophila mojavensis]	34720.486542	0.096	1	1	-	1.06	1.140|0.989	0.011	1|1	0.893|0.993	2.89	1.782|4.007	2.475	1|1	0.311|0.105	0.73	1.051|0.403	0.210	1|1	0.966|0.147	2.52	3.850|1.190	3.538	1|1	0.062|0.742	1.39	1.030|1.749	0.258	1|1	0.974|0.390	2.31	1.575|3.035	1.066	1|1	0.424|0.147	Unigene13785_17	SQKVQGLYVGKIVIGSADSSIGVVGDMLPFEGCIQNVRIGASQSVLSRPTIRENVEDGCMSRAECPESCPPHSTCTTTWDQSQCECLPGYVGPDCLPICTVKPCTAGVCRANISEPRGYKCECNSSLQHGEYCEKTVQQPCPGGWWGEKVCGPCKCNLKQGYHPDCNKTTGQCYCKTNHYQPPNETACIPCDCYSIGSFSSACNRLTGQCECREGVIGRRCDSCSNPYAEVTLNGCEVVYDACPRSFAAGIWWPRTPLGSTTVENCPSPARGKGQRTCDGMSGGWNQPDMFNCTSDPFVELRK	83.50	5e-159	gi|195120792|ref|XP_002004905.1|	GI19343 [Drosophila mojavensis]	79.87	1e-150	sp|Q9V5N8|STAN_DROME	Protocadherin-like wing polarity protein stan OS=Drosophila melanogaster GN=stan PE=1 SV=4	83.50	2e-158
457	Unigene14398_17	GK16117 [Drosophila willistoni]	53519.228959	0.048	1	2	-	1.13	1.039|1.224	0.017	2|2	0.960|0.646	1.05	1.115|0.992	0.008	2|2	0.839|0.988	1.01	0.925|1.090	0.014	2|2	0.908|0.877	1.18	1.199|1.151	0.001	2|2	0.698|0.674	0.93	0.857|1.010	0.012	2|2	0.770|0.992	0.94	1.088|0.786	0.046	2|2	0.886|0.624	Unigene14398_17	PTPVLEPCIPLPIEKCTLTDVTEKAKDWAIMHGVAMRSKTNFSADSLNFAPFILIPSSFPRKEFEKAKNLQTIINQLMHNVAHDEEFLTTTLAETVKVDEFTANLFNVYKKVLANGLGQAYSLGLLRSDYLAHMFEDNSVKQVEINTIASSFGGISTHMMPLQSFVMGELGHADKIKNMPTNAALSGLCGGMIKAWEVYAEPKAVILFIIEDISYNICDQRFHEFYIREQRPNIKVLRRTLTEVHKEGKLGPNKELLLGEYEVAVIYFRAGYEPGHYPSQDEWDARYMMEYSRAIKSPSIHYHLAGTKKVQQALAQPEMLERFISDPEKIKAVGQIFTGLYSLDDSEAGNASYEMALKEPERFVLKPQREGGGNNVYGVDIPDALRKMSRVERAAWILM…	78.87	0.0	gi|195439340|ref|XP_002067589.1|	GK16117 [Drosophila willistoni]	42.79	5e-102	sp|P35668|GSHB_XENLA	Glutathione synthetase OS=Xenopus laevis GN=gss PE=2 SV=1	78.87	0.0
458	Unigene14600_17	GL23909 [Drosophila persimilis]	38392.480034	0.501	11	44	-	1.04	1.073|0.998	0.003	44|42	0.239|0.982	1.02	1.035|1.006	0.000	41|43	0.399|0.950	1.26	1.230|1.282	0.001	44|44	0.011|0.001	0.83	0.806|0.850	0.001	44|43	0.001|0.001	1.24	1.262|1.224	0.001	44|44	0.000|0.001	0.99	0.988|0.991	0.000	44|43	0.893|0.920	Unigene14600_17	ARRAFSTSPKTLAAKQITVREALNTALDEEMARDDRVFLMGEEVAQYDGAYKVSRGLWKKYGDHRVVDTPITEMGFAGIAVGAAMAGLRPICEFMTFNFSMQAIDHVINSAAKTFYMSAGMVNVPIVFRGPNGAAAGVAAQHSQCFAAWYGHCPGLKVISPFDSEDARGLLKAAIRDPDPVVCLENEMLYGVAFPVDDKVLDKDFILPIGKAKIMKPGNHITLVAHSKAVDTSLVAAAELAKKGIEAEVINLRSIRPLDMDTICQSVKKTHHLVTVEQGWPQHGIGAEICARIMEDETFFHLDAPVWRVCGVDVPMPYAKTLEANALPQAHNVVEAVTKIIGPKKUKIT	85.46	3e-174	gi|194906576|ref|XP_001981395.1|	GG11642 [Drosophila erecta]	71.13	4e-142	sp|P49432|ODPB_RAT	Pyruvate dehydrogenase E1 component subunit beta, mitochondrial OS=Rattus norvegicus GN=Pdhb PE=1 SV=2	85.46	9e-174
459	Unigene6617_17	GF24791 [Drosophila ananassae]	9541.757054	0.107	1	2	-	0.61	0.495|0.723	0.026	2|2	0.048|0.395	0.74	0.680|0.798	0.007	2|2	0.285|0.663	0.69	0.597|0.780	0.017	2|2	0.176|0.550	0.87	0.927|0.818	0.006	2|2	0.870|0.493	0.84	0.868|0.815	0.001	2|2	0.790|0.694	1.2	1.307|1.096	0.022	2|2	0.527|0.861	Unigene6617_17	MVSFEEACEKAKSFSKKPTDSEFLEFYGLFKQATVGDVNVEKPGALDLKRKAMWDAWNSRKGLSQAAAQEAYIKVYEKYAPTYA	82.14	4e-34	gi|194747213|ref|XP_001956047.1|	GF24791 [Drosophila ananassae]	55.81	3e-19	sp|P42281|ACBP_DROME	Acyl-CoA-binding protein homolog OS=Drosophila melanogaster GN=Dbi PE=2 SV=1	82.14	2e-33
460	Unigene15551_17	191 715 minus strand NADH-ubiquinone oxidoreductase NDUFA8/PGIV/19 kDa subunit [Glossina morsitans morsitans]	20320.840962	0.583	6	16	-	0.96	0.922|1.006	0.004	15|16	0.534|0.980	1.08	1.075|1.084	0.000	16|15	0.508|0.213	0.97	0.940|0.999	0.002	14|16	0.437|0.996	0.97	1.004|0.927	0.003	16|16	0.984|0.292	1.09	1.034|1.152	0.007	16|16	0.788|0.002	1.14	1.200|1.084	0.007	14|15	0.013|0.271	Unigene15551_17	MVITNDITLPTDEELTVQELNLSTSALRAGAFHLGKHCENQNNEFMLCRQELDDPRACINEGKAVTSCALDFFRKVKKTCHEEFLQYAICLDKSSGNMAFGHCRKTQSVFDKCVSDNLGIDRPEYGYFTQAKIHSTEREAPAKPIKKEYRDATPGLPDDYPKPPAKYGSRFHWLE	78.29	4e-79	gi|17946601|gb|AAL49331.1|	RH23043p [Drosophila melanogaster]	45.51	2e-35	sp|Q0MQB1|NDUA8_PANTR	NADH dehydrogenase [ubiquinone] 1 alpha subcomplex subunit 8 OS=Pan troglodytes GN=NDUFA8 PE=2 SV=3	80.00	3e-80
461	CL2837.Contig3_17	GJ16225 [Drosophila virilis]	158276.371616	0.150	15	71	CL2837.Contig2_17;CL2837.Contig1_17	1.52	1.547|1.490	0.002	70|70	0.001|0.001	1.38	1.302|1.466	0.013	71|71	0.001|0.001	1.76	1.823|1.700	0.008	70|70	0.001|0.001	0.89	0.870|0.904	0.001	67|66	0.001|0.001	1.55	1.593|1.510	0.003	71|71	0.000|0.000	0.92	0.902|0.931	0.000	71|71	0.001|0.094	CL2837.Contig3_17	RLCIAALEIIQIVALVCAAGHYSVIGPGTIRSNFKYNVAVSVHKAEGPSKIDVSITGPSFNETKTVELQPMSTGNVEFNVPQLQDGDYSLVAKGVSGLHFENSTKLNYADYKPATFIQTDKATYKPGDLVQFRVLFLDANTRPAKIEQPITILINDGARNRIKQFKNVKLTQGVYTGEFQLSEQPVLGDWNIEIIVEGQSPESKTFEVAKYVLPKFEVSIETAKDVAIPDGVIKVTVRSKYTFGKSVEGVATVSIKPIYHHYGMNIQPEAYKMVYVDGKGHAEFDLSKDLGISGERTYVPPLKVLATMKEKLTGNTQNASATIYLHAERYRIEGVDVPSNYQPGKPTKITVVVKNLDGSPVRDTKNKAKLFVHPPRDYIFRDYLSKDETTQNEEDKILE…	62.81	0.0	gi|195401068|ref|XP_002059136.1|	GJ16225 [Drosophila virilis]	30.50	2e-173	sp|Q6YHK3|CD109_HUMAN	CD109 antigen OS=Homo sapiens GN=CD109 PE=1 SV=2	62.81	0.0
462	CL493.Contig1_17	39 1133 minus strand heat shock cognate protein Hsc70-2 [Acytostelium subglobosum]	40408.955838	0.033	1	1	-	0.75	0.657|0.847	0.018	1|1	0.509|0.832	0.74	0.792|0.689	0.005	1|1	0.718|0.585	1.33	1.204|1.461	0.033	1|1	0.834|0.561	0.56	0.575|0.541	0.001	1|1	0.238|0.141	1.31	1.197|1.429	0.027	1|1	0.816|0.599	0.99	1.166|0.806	0.065	1|1	0.837|0.748	CL493.Contig1_17	AIGIDLGTTYSCVAVWESERVEIIANEQGNRTTPSYVAFSEQERLIGDAAKNQAAMNPTNTVFDAKRLIGRRFDDPEVKADMKHWPFTVIDKESAPFIQVDYQGEKKEFSPQEISAMVLVKMREIAEAKLGKTVSKAVITVPAYFNDAQRHATKDAGAIAGLDVLRIINEPTAAAIAYGLDSKETKEKHVLIFDLGGGTFDVSLLTITGGVFAVKATAGDTHLGGEDFDNTLLEHFKEEFKRKHKKDISGDARATRRLRTACERAKRTLSSLAQTTIEVDSLFDGVDFQANITRARFEEINSVHFNNTIEPVKKVLKDAKYAKKEVDEIVLVGGSTRIPKIQALLQEFFDGKELNKSINPDEAVA	74.52	7e-150	gi|348522853|ref|XP_003448938.1|	PREDICTED: heat shock cognate 71 kDa protein-like [Oreochromis niloticus]	76.50	5e-152	sp|Q6CQ83|HSP75_KLULA	Heat shock protein SSB OS=Kluyveromyces lactis (strain ATCC 8585 / CBS 2359 / DSM 70799 / NBRC 1267 / NRRL Y-1140 / WM37) GN=SSB PE=3 SV=3	82.74	8e-167
463	CL2318.Contig1_17	GI13383 [Drosophila mojavensis]	49504.306959	0.023	1	3	-	0.91	0.863|0.954	0.004	3|3	0.545|0.891	1.01	1.096|0.928	0.014	3|3	0.806|0.863	0.93	0.894|0.957	0.002	3|3	0.660|0.880	0.98	1.005|0.961	0.001	3|3	0.988|0.857	1.03	0.932|1.133	0.020	3|3	0.810|0.695	1.1	1.229|0.963	0.035	3|3	0.367|0.916	CL2318.Contig1_17	MSGEETSADRNVEIWKIKKLIKSLEMARGNGTSMISLIIPPKDQISRVSKMLADEFGTASNIKSRVNRLSVLGAITSVQHRLKLYTKVPPNGLVIYCGTIVTEEGKEKKVNIDFEPFKPINTSLYLCDNKFHTEALTALLADDNKFGFIVMDGNGALFGTLQGNTREVLHKFTVDLPKKHGRGGQSALRFARLRMEKRHNYVRKVAEVATQLFITNDKPNIAGLILAGSADFKTELSQSDMFDPRLQSKVIKLVDVSYGGENGFNQAIELAAESLQNVKFIQEKKLIGRYFDEISQDTGKYCFGVEDTLRALELGSVETLICWENLDIQRYVLKNHANSTSNTVLHLTPEQEKDKSHFTDKESGVEMELIESQPLLEWLANNYKMFGATLEIITDKSQE…	99.76	0.0	gi|195427621|ref|XP_002061875.1|	GK16952 [Drosophila willistoni]	99.76	0.0	sp|Q9VPH7|ERF1_DROME	Eukaryotic peptide chain release factor subunit 1 OS=Drosophila melanogaster GN=eRF1 PE=1 SV=2	99.76	0.0
464	Unigene15105_17	604 1371 minus strand multifunctional chaperone [Glossina morsitans morsitans]	29292.55806	0.254	4	5	-	2.02	2.083|1.962	0.007	3|4	0.003|0.001	1.44	1.351|1.537	0.017	5|5	0.022|0.008	2.26	2.491|2.029	0.107	5|4	0.006|0.001	0.96	1.025|0.896	0.008	5|5	0.928|0.582	1.48	1.445|1.514	0.002	5|5	0.058|0.006	0.75	0.686|0.816	0.008	3|5	0.065|0.323	Unigene15105_17	MSERENNVYKAKLAEQAERYDEMVEAMKKVASLDVELTVEERNLLSVAYKNVIGARRASWRIITSIEQKEENKGAEEKLEMIKTYRGQVEKELRDICSDILNVLENHLIKCATTGESKVFYYKMKGDYHRYLAEFATGSDRKDAAENSLIAYKAASDIAMNDLPPTHPIRLGLALNFSVFYYEILNSPDRACRLAKAAFDDAIAELDTLSEESYKDSTLIMQLLRDNLTLWTSDMQADGDGEQKPEIQDVEDQDVS	96.48	7e-143	gi|24647891|ref|NP_732312.1|	14-3-3epsilon, isoform C [Drosophila melanogaster]	94.27	1e-141	sp|P92177|1433E_DROME	14-3-3 protein epsilon OS=Drosophila melanogaster GN=14-3-3epsilon PE=1 SV=2	97.66	6e-144
465	CL3249.Contig2_17	GE18829 [Drosophila yakuba]	34213.6693480001	0.069	1	1	CL3249.Contig1_17	1.03	1.045|1.020	0.000	1|1	0.966|0.988	0.86	1.076|0.639	0.095	1|1	0.928|0.570	1.06	0.789|1.330	0.146	1|1	0.793|0.687	1.05	0.733|1.362	0.198	1|1	0.639|0.480	0.89	0.910|0.874	0.001	1|1	0.922|0.882	0.88	1.064|0.690	0.070	1|1	0.934|0.621	CL3249.Contig2_17	QQQQQQQQQQKERLLQQQQKQQLLVPESATARTDQLCLNPNINNIGSLLNNTVAPNVALSRTNLPPDSQLSPNFPQNLLQQQQLSPGQRNAPFSPQSNAGYAPQYSQSGQRLSPHHQQHISQQQQQVNVQQQQQMAFQAAQAANTNVAPQLSPRQPPFGAGAGGVQSPTGMPNSSSQQWNAGGNVSTPSAQLSGNVTTQRGHSLQQHNPMLSAQLQQGVSPYTTRPYQNQRRSLNSPNGGGVSGNTASNIGTNVSLQRQNSFQGGESGGFSGTSNSPSPQSPYGASSSNVFQQQQMQRMQRQSSVPQTTQHLPGSPR	92.44	7e-92	gi|385842594|gb|AFI80737.1|	Taiman [Bactrocera dorsalis]	-	-	-	-	53.69	1e-28
466	Unigene14973_17	GF13006 [Drosophila ananassae]	15197.193919	0.115	1	3	-	2.23	2.248|2.204	0.001	3|3	0.001|0.002	1.6	1.553|1.640	0.004	3|3	0.033|0.049	2.89	2.957|2.818	0.010	3|3	0.001|0.001	0.78	0.788|0.770	0.000	3|3	0.497|0.098	1.98	1.966|1.996	0.000	3|3	0.027|0.004	0.72	0.732|0.698	0.001	3|3	0.137|0.094	Unigene14973_17	MSGTTATIRTRKFMTNRLLARKQMVCDVLHPGLASVNKKDIREKLASMYKVTPDVCFVFGFRTNFGGGRSTGFALIYDTLDYAKKFEPKYRLARHGLFEQKKQTRKQRKERRNRMKKVRGTAKSKIGSGKK	93.89	4e-55	gi|194754850|ref|XP_001959707.1|	GF13006 [Drosophila ananassae]	80.92	5e-48	sp|Q962Q6|RS24_SPOFR	40S ribosomal protein S24 OS=Spodoptera frugiperda GN=RpS24 PE=2 SV=1	93.89	2e-54
467	Unigene14514_17	86 862 minus strand NADH-ubiquinone oxidoreductase NDUFS3/30kDa subunit [Glossina morsitans morsitans]	30046.316712	0.050	1	3	-	0.95	0.902|0.991	0.004	3|3	0.702|0.988	0.97	0.980|0.964	0.000	3|3	0.976|0.938	1.11	1.080|1.140	0.002	3|3	0.793|0.629	0.86	0.873|0.840	0.001	3|3	0.677|0.272	1.13	1.101|1.150	0.001	3|3	0.716|0.644	1.01	1.063|0.965	0.005	3|3	0.881|0.920	Unigene14514_17	MAAIIRRIGCRAIGNFAAKNVAAPKAVGSIRFSRTKHAPPAEDRPTFRKSNETARLNLSNFGRYVAECLPKYVQKVQLTAGDELEVLIAPEGVVPVLQFLKDNHLAQFSSLVDIAGMDVPNRQYRFEVIYNLLSLRFNSRIRVKTYTDELTPLDSCNEVYKAANWYEREVWDMYGVFFANHPDLRRILTDYGFEGHPQRRDFPLSGYVELRYDDEKKRVVCEPLELAQEFRKFDLSAPWEQFPNFRNANPPAETVEAKE	84.89	7e-114	gi|170055789|ref|XP_001863738.1|	NADH dehydrogenase iron-sulfur protein 3, mitochondrial [Culex quinquefasciatus]	72.51	1e-87	sp|O75489|NDUS3_HUMAN	NADH dehydrogenase [ubiquinone] iron-sulfur protein 3, mitochondrial OS=Homo sapiens GN=NDUFS3 PE=1 SV=1	81.38	4e-114
468	Unigene29714_17	205 420 minus strand copper chaperone [Glossina morsitans morsitans]	7960.134968	0.250	1	2	-	1.54	1.458|1.615	0.012	2|2	0.318|0.170	0.99	0.920|1.050	0.008	2|2	0.889|0.948	1.76	1.696|1.821	0.008	2|2	0.167|0.098	0.88	0.904|0.857	0.001	2|2	0.834|0.635	1.11	1.158|1.057	0.005	2|2	0.782|0.939	0.64	0.648|0.626	0.000	2|2	0.210|0.185	Unigene29714_17	MPVHEFKVEMTCSGCANSVERVLNKLGAEKVEKIAIDLDSKTVLVTSNLTSDELLETIKKTGKATQYVGVKE	70.83	7e-22	gi|194875789|ref|XP_001973665.1|	GG16213 [Drosophila erecta]	54.93	1e-14	sp|Q9XT28|ATOX1_SHEEP	Copper transport protein ATOX1 OS=Ovis aries GN=ATOX1 PE=3 SV=1	83.33	5e-25
469	Unigene17545_17	GJ15090 [Drosophila virilis]	41594.793861	0.245	7	9	-	1.11	1.104|1.120	0.000	8|9	0.177|0.418	1.01	1.098|0.931	0.014	8|9	0.282|0.399	1.09	1.076|1.095	0.000	9|9	0.574|0.461	1.04	1.028|1.050	0.000	9|9	0.765|0.548	0.97	0.979|0.957	0.000	6|8	0.902|0.748	0.87	0.920|0.817	0.005	9|9	0.610|0.161	Unigene17545_17	MSFQTPTTTTAASTGFSFGLGTAAGAAKPASFSFGATGGGDAGAVKPLSFGAPAPTTTTMAAPAAVGFGGGFQGAATTTTGTASALPAASTTTTGFSFGAPTASSATVAPSTAAPATTAPAGFGFGAAQTAAATTASTGFGFGSTASAGATTAVGATTTSITAAPAFPVTITKTTAAALPTLGTLSASTAPATGGFANLSTATKTTESAAVANASHLTYNQLEEHINKWTLELEEQEKVFADQATQINAWDKILISNNHKILELNDAVQKVKSDQQTLEQELEFIATQHKELEESIVPLQKEFLKLPQVDVERSQTYLLVENLDTQLKQMSEDLKEIIDNLNEANKGQDSTDPIIQIGKILNAHMSSLQWIESSTTNISNKLDDITKMHESFKRESERS…	80.10	5e-90	gi|198456832|ref|XP_001360457.2|	GA19470 [Drosophila pseudoobscura pseudoobscura]	47.89	3e-47	sp|Q63850|NUP62_MOUSE	Nuclear pore glycoprotein p62 OS=Mus musculus GN=Nup62 PE=1 SV=2	80.10	2e-89
470	Unigene37944_17	GE20338 [Drosophila yakuba]	23566.044252	0.108	1	1	-	0.99	1.065|0.918	0.011	1|1	0.947|0.916	0.78	0.882|0.670	0.022	1|1	0.858|0.582	1.06	1.022|1.097	0.003	1|1	0.985|0.911	0.94	0.835|1.040	0.021	1|1	0.779|0.943	0.83	0.819|0.844	0.000	1|1	0.792|0.843	0.79	0.834|0.736	0.005	1|1	0.808|0.648	Unigene37944_17	KNHLFISISPLVCEGSQQRIKQMVLSKIDFAAQKIDLYEVLNGKASELITFARTENNTADVSVHFKSDVNSKNIDIACQNCRIELDISMYDRLSALLAPSPFAAFSSKSTSHFLKHETSKSTLITNLTSTAMELILRFPIYDARPIHDPHRVPWWQKNVRSDYMIISLDYICMKFAGGIFELLTNELNAYYTDKERSDKVWILK	32.11	1e-21	gi|77455454|gb|ABA86536.1|	CG1241 [Drosophila yakuba]	-	-	-	-	32.11	4e-21
471	Unigene15340_17	GA17249 [Drosophila pseudoobscura pseudoobscura]	36354.263047	0.039	1	1	-	1.11	1.125|1.097	0.000	1|1	0.881|0.911	1.06	1.007|1.120	0.006	1|1	0.994|0.906	1.59	1.413|1.773	0.065	1|1	0.644|0.352	0.7	0.614|0.789	0.015	1|1	0.306|0.618	1.53	1.798|1.256	0.147	1|1	0.330|0.766	0.94	0.884|1.003	0.007	1|1	0.865|0.995	Unigene15340_17	MFYNKYLTLALVLSICSALVCAAQIDVSLDKAKLSADATAVPVVGKDEVVEKKITTTPSTTSSTSSTTTTSTTTTTTSTTTPAPTTSTTPSTTTTVTPTTTVAPTTTTVAPITTTPAPAPFPAPEIGMWNSSCIIMHFAAQLNVTYETKDNKTASRLYNIPKDAKVEDSNCANVSQSIHIIWGPVEAIHSMALQFDLVNKSSELRQILISLPLTSDHFPDAKDNETMQLIHIGDDFVTPVKMSYHCTRAQKFNLTEVMQDTKVIGTITLSNVQTEAFITDNRNTFSNAMDCDGPKTMDIVPIAVGIAMAALILIVLISYLCARRRSTSRGYMSF	56.02	6e-56	gi|198472877|ref|XP_001356101.2|	GA17249 [Drosophila pseudoobscura pseudoobscura]	29.41	8e-07	sp|Q05204|LAMP1_BOVIN	Lysosome-associated membrane glycoprotein 1 OS=Bos taurus GN=LAMP1 PE=1 SV=2	57.08	3e-56
472	Unigene14836_17	GK22516 [Drosophila willistoni]	83149.0877009999	0.248	14	70	-	1.81	1.883|1.740	0.010	70|68	0.001|0.001	1.83	1.749|1.902	0.012	70|67	0.001|0.001	2.21	2.302|2.118	0.017	69|70	0.001|0.001	0.82	0.829|0.816	0.000	69|66	0.001|0.001	2.15	2.131|2.164	0.001	69|68	0.000|0.000	0.99	0.964|1.023	0.002	70|70	0.260|0.624	Unigene14836_17	VINKAFVNAGQKPGVEIWRIEDFEPVPYPAKYYGKFYEGDSYIILKTTEDPKSQKLSWDIHFWLGAATTTDEAGAAAICTVQLDDQLDGAPVQHREVQDHESQLFLSYFKNGVRYEKGGVATGFEHVDVNAGGEKRLFQVKGKRNVRVRQVALSITSMNRGDCFILDAGEEILVYVGEQAKRLERLKAIYAANEIRDQDHHGRAKVNIIDNFSSDFAKEHFFATLGSGSADEVADESTDEEDGAFETADIKAVTLYKVSDASGALEIEKISEKPLRQEMLNTDDSFILDTDSGIYVWVGRNSTQKEKNSAMKAAEHFLESNSYPTWTQVHRVVEDGEPAPFKQYFATWHDQGVHHKRLIRTALGYSTDDSDYEEPEDVDSVVKNLKKSGGRAIAFMPDF…	65.90	0.0	gi|195449437|ref|XP_002072074.1|	GK22516 [Drosophila willistoni]	61.79	0.0	sp|Q07171|GELS_DROME	Gelsolin OS=Drosophila melanogaster GN=Gel PE=1 SV=2	65.90	0.0
473	Unigene7200_17	GH15319 [Drosophila grimshawi]	17028.442968	0.088	1	2	-	0.73	0.688|0.765	0.003	2|2	0.312|0.502	0.61	0.633|0.588	0.001	2|2	0.179|0.152	0.64	0.620|0.661	0.001	2|2	0.211|0.263	1.13	1.160|1.091	0.002	2|2	0.700|0.821	0.54	0.514|0.572	0.002	2|2	0.054|0.143	0.83	0.898|0.762	0.009	2|2	0.857|0.501	Unigene7200_17	RPHPKAVSPPRHSQPQYQPQKAKLQAQRPQQQSEEEEYDDQNSSYQFGFDVKDDEFTNYQNRKEVRDGSVIKGSYSVVDSDGFIRTVKYTADPKEGFKAEVIREPTDIVVKIPTPAPQPLARQTHKSQDYALKPSQQYHQQQPQYHQ	87.64	7e-36	gi|195125852|ref|XP_002007388.1|	GI12918 [Drosophila mojavensis]	54.24	7e-12	sp|P80683|CUA3A_TENMO	Larval cuticle protein A3A OS=Tenebrio molitor PE=1 SV=1	87.64	3e-35
474	Unigene14322_17	GF10534 [Drosophila ananassae]	10114.327847	0.090	1	2	-	0.57	0.600|0.531	0.002	2|2	0.140|0.068	0.75	0.816|0.678	0.010	2|2	0.680|0.304	0.73	0.741|0.720	0.000	2|2	0.483|0.400	0.77	0.736|0.795	0.002	2|2	0.268|0.422	0.97	0.927|1.010	0.003	2|2	0.906|0.992	1.29	1.325|1.262	0.002	2|2	0.496|0.576	Unigene14322_17	MRITSSLLGAHFGNLAKVHGIVTYKLSPFEQRAFAGAISKGLPNIFNRIRSNIFTVAPPFIVGYLIYDLTEREHHHLSRKNPKDFENEE	80.90	5e-36	gi|194750719|ref|XP_001957677.1|	GF10534 [Drosophila ananassae]	50.00	4e-19	sp|Q9CQ69|QCR8_MOUSE	Cytochrome b-c1 complex subunit 8 OS=Mus musculus GN=Uqcrq PE=1 SV=3	80.90	2e-35
475	Unigene14593_17	GF18798 [Drosophila ananassae]	24009.051511	0.216	4	10	-	1.06	1.034|1.086	0.001	10|10	0.762|0.684	0.93	0.970|0.882	0.004	10|9	0.924|0.200	1.44	1.381|1.497	0.007	10|10	0.015|0.005	0.71	0.722|0.701	0.000	10|9	0.001|0.004	1.25	1.287|1.222	0.002	10|9	0.004|0.055	0.89	0.923|0.847	0.003	10|10	0.335|0.040	Unigene14593_17	MGISRDSAHKRRATGGKRKSLRKKRKFELGRPAANTKLGAPRIHKVRTRGGNTKFRALRLETGNFSWASEGIARRTRIADVVYNASNNELVRTKTLVKNTIVVIDATPFRQWYESHYVLPLGRKRNPKHQKTEDENDVLNKKRSEKVMKKYLERQKFAKVEPALEDQFISGRILACVSSRPGQCGRSDGYILEGKELEFYLKKIKSKK	91.83	1e-103	gi|194746037|ref|XP_001955491.1|	GF18798 [Drosophila ananassae]	91.35	7e-104	sp|Q8MLY8|RS8_DROME	40S ribosomal protein S8 OS=Drosophila melanogaster GN=RpS8 PE=1 SV=1	91.83	4e-103
476	Unigene6353_17	scribbled, isoform M [Drosophila melanogaster]	117928.270778	0.017	1	2	-	1.14	1.279|1.004	0.038	2|2	0.592|0.996	0.88	1.045|0.707	0.057	2|2	0.954|0.481	1	0.842|1.152	0.048	2|2	0.752|0.784	1.19	0.878|1.511	0.200	2|2	0.789|0.095	0.78	0.840|0.729	0.006	2|2	0.725|0.484	0.8	0.869|0.734	0.009	2|2	0.814|0.474	Unigene6353_17	IAECTTITTTTTTRFESPTPPPTPAPQSQPQAFANRGETAEPQALPKFEKQKKSKKANAKSKAATTAPRVSTTPIDNDVAVELVAHRKAPPPPTLANPQLPAQVTSEWVATQSAHLAAFKSPALVKSLTESSPNAAATTTATPVAIAQSLKPQVDSALALSVEKIAPAPAPRTTAQQLSSTVAQFVDIERQHADVPSDYNEAEDTASSIESVIAVTPSATLSTSTLRIYNQQKPSLLPKPKVKVLIPPALLLQQTQQQQEEQQRETSPTTASSRIPIRTVNAERRALKAAAAAVGGAVAGAHDEAASPDVVERSPDAVQHEQSQSNVSKSKAIINAEKRASWRAARLRSLEQGAQEAQSVIKNMNKIADDLLTAPIATEVETCQEKIISLELQDPENDD…	37.64	1e-51	gi|198451593|ref|XP_001358432.2|	GA18901 [Drosophila pseudoobscura pseudoobscura]	-	-	-	-	37.64	4e-51
477	Unigene6840_17	GH20023 [Drosophila grimshawi]	20481.454502	0.543	6	29	-	0.85	0.835|0.862	0.000	27|29	0.003|0.101	0.91	0.811|1.009	0.020	27|27	0.001|0.957	0.89	0.902|0.887	0.000	27|28	0.052|0.044	0.88	0.866|0.897	0.000	25|27	0.001|0.001	1.03	1.186|0.881	0.047	29|27	0.057|0.020	1.12	0.955|1.288	0.055	26|29	0.240|0.014	Unigene6840_17	MRFLFLIALLALVPKTFTKKSEVGKKPEWAKKDIRDFTDADMERLLDQWEEDEELLEPDELPEHLRPQPKIDLSNLDSRNPEELLKASKKGRTLMTFVSVGGNPVREEADTITKLWQTSLWNNHIQAERYMVDDDRAIFLFKDGSQAWDAKDFLIKQTRCKGVTIENKEYPGEWS	77.71	3e-61	gi|195028969|ref|XP_001987347.1|	GH20023 [Drosophila grimshawi]	84.42	2e-56	sp|Q8T9B6|MESD_DROME	LDLR chaperone boca OS=Drosophila melanogaster GN=boca PE=1 SV=2	77.71	9e-61
478	Unigene14608_17	GL17995 [Drosophila persimilis]	46383.263	0.042	1	1	-	1.59	1.864|1.307	0.155	1|1	0.302|0.681	1.14	1.110|1.175	0.002	1|1	0.888|0.861	1.81	1.933|1.687	0.030	1|1	0.317|0.396	0.87	0.775|0.957	0.017	1|1	0.640|0.938	1.33	1.501|1.151	0.061	1|1	0.519|0.873	0.74	0.609|0.879	0.036	1|1	0.387|0.861	Unigene14608_17	MASEVSQTPVTENKVAEEAAAAAASKPETTATEAVAAKENNAESNGADTANAQEKGDDTKASAGEDTKKDGDNATTAAAANSKAEPAPKFNVHKTNFEKDVIYLYQFSRTPLLPSLSPYCLKVETWLRLAGLKYENVDHKMRFRSKKGQLPFIELNGEEIADSAIIIKELSARYEKNLDATLTTEQRNVSYAMIAMLENHLIWIIFYWRAKYPDNVLKGYKVNLQHALGLRWPNSILNFVFKFTFGRKGSKKLKAHGIGVHSPEEIEEFGKNDLKVLSEMLDCKPFFFGDEPTTLDVVAFAILSQLHYLSKDISYPLRDFMTEKCPNLVGHVSRMKERCFPDWDEICTKLDLNAHIPKPEPETKEGKEGEPEKSNEQENDSDKNEKELEKDKPNEKEIT…	86.73	9e-155	gi|62472216|ref|NP_001014587.1|	failed axon connections, isoform C [Drosophila melanogaster]	85.90	1e-153	sp|Q95RI5|FAXC_DROME	Failed axon connections OS=Drosophila melanogaster GN=fax PE=2 SV=1	86.73	3e-154
479	Unigene31970_17	GK17767 [Drosophila willistoni]	87995.2167789998	0.035	2	4	-	0.87	0.945|0.787	0.012	4|4	0.786|0.136	0.99	1.068|0.908	0.013	4|3	0.830|0.793	0.84	0.790|0.895	0.006	3|4	0.280|0.480	0.92	0.840|1.008	0.014	3|4	0.361|0.974	1.03	1.003|1.051	0.001	3|4	0.990|0.883	1.23	1.183|1.283	0.005	3|4	0.503|0.126	Unigene31970_17	VIRAFSPPRSASAILWKFHPEYLNWNTKCCISGSILNIANKAPFSIQHNTADSISSNSIKFNTSAPTAKGSTGNSNWGTKKNKRKIRLRFTDIMSNPEIEAKLAPLRAAVLEQGNLVRELKVKGAPEIDVKRAVAELKVRKKILEDRELELTPSVVIFDRSKMEDLLKRRFFYDQSFAIYGGITGQYDFGPMGCALKSNILSLWRQFFVLEEQMLEVDCSILTPEPVLKASGHVDRFADLMVKDVKTGECFRLDHLIKNALEKLSKEKTATPEVKAECEDIVIKLDGMNKQEMSDVLSKYNIKSPLTGNDLTEPIEFNLMFATQIGPTGLVKGFLRPETAQGIFVNFKRLLEFNQGKLPFAVAQIGNSFRNEISPRSGLIRVREFTMAEIEHFCDPNLK…	82.00	0.0	gi|194751574|ref|XP_001958100.1|	GF23682 [Drosophila ananassae]	68.19	0.0	sp|Q04451|SYG_BOMMO	Glycine--tRNA ligase OS=Bombyx mori PE=1 SV=2	82.00	0.0
480	Unigene32071_17	83 664 molecular chaperone prefoldin subunit 3 [Glossina morsitans morsitans]	22548.437105	0.160	3	8	-	1.04	1.064|1.020	0.001	7|7	0.511|0.891	1.22	1.284|1.153	0.009	7|8	0.009|0.087	1.32	1.412|1.219	0.019	7|8	0.002|0.171	0.78	0.799|0.759	0.001	8|8	0.063|0.049	1.57	1.436|1.712	0.038	8|7	0.015|0.000	1.13	1.178|1.084	0.004	8|7	0.036|0.370	Unigene32071_17	MTGILDSIEMPKLAENQKSFAGIPEAIFLEEIDTFMSQPENEDNCEKVLQRLDEQHSKYRFMAFNLEARRRKLKSQIPDLQRSLEMINVLREEKEERETQFLLSDQVFIKTLVPPTKTVCLWLGASVMLEYPLDEAEELLKQNMNSAVVNLKTVEHDQDFLRDQLTTTEVNMARVYNWGVKKRQAAAKTPSPSS	88.14	4e-97	gi|195389234|ref|XP_002053282.1|	GJ23797 [Drosophila virilis]	89.71	1e-87	sp|Q9VGP6|PFD3_DROME	Probable prefoldin subunit 3 OS=Drosophila melanogaster GN=CG6719 PE=3 SV=2	86.60	2e-97
481	Unigene659_17	134 883 minus strand proline synthetase co-transcribed protein [Glossina morsitans morsitans]	28154.439999	0.300	5	51	-	0.96	0.958|0.970	0.000	50|49	0.445|0.567	1.05	1.107|0.992	0.007	48|48	0.001|0.904	0.96	0.930|0.981	0.001	51|51	0.020|0.720	0.99	0.973|1.009	0.001	49|51	0.470|0.873	1.05	0.989|1.105	0.007	50|51	0.837|0.004	1.07	1.156|0.991	0.014	51|51	0.001|0.903	Unigene659_17	MSDVNVKAGIECILKRIDEAYARRPPDIREPKPLLVAVSKTKPVEMIIEAYEAGQRHFGENYVQELVEKTQHPDILQHCPDIKWHFIGHLQNNKINKVLKLPNLYMIQTVDSERLANGLNTAWEKIQNDNKNPLSVLIQINTSGEETKNGVPPTEASALYKHIIENLKNLKLEGVMTIGAFGFDYSTGPNPDFVSLKNVHKQICEENNLEPNAVQVSMGMSDDFENAIEAGSTIVRVGSAIFGFRAKKDI	68.15	2e-99	gi|195159394|ref|XP_002020564.1|	GL14062 [Drosophila persimilis]	51.42	2e-72	sp|O94903|PROSC_HUMAN	Proline synthase co-transcribed bacterial homolog protein OS=Homo sapiens GN=PROSC PE=1 SV=1	72.40	1e-106
482	Unigene14960_17	GF13136 [Drosophila ananassae]	24245.452464	0.173	2	6	-	1.44	1.407|1.467	0.002	6|6	0.049|0.002	1	1.016|0.979	0.001	4|5	0.976|0.940	1.08	0.760|1.398	0.204	5|5	0.053|0.015	1.36	0.994|1.720	0.264	6|5	0.984|0.001	0.83	1.014|0.637	0.071	6|6	0.959|0.008	0.7	0.724|0.672	0.001	6|6	0.035|0.001	Unigene14960_17	AIIVVASVFATTSAEADAGFFIPKAFYTLDAEGHKTQPHAVSPHTAQYLRRLRRQTFSSSSSSSSSYSSSGNGRPVVFGHVSTTSQDPSGTVSIINRFGDDGSSTTYSNGSPGVGVNYPTGSSTGYNGDYHNGAGQYDTNSNHYGSNSYDDHINRGDYNAAPQYSAVSASSSLQSNGGPVVFKTEQSVTSNKPNPNVQNRFGGDDTPQTVSKTVSTTGYIDEKGVVHSKTT	47.79	2e-09	gi|195334469|ref|XP_002033900.1|	GM21573 [Drosophila sechellia]	-	-	-	-	47.79	7e-09
483	Unigene15274_17	GJ12092 [Drosophila virilis]	120673.929001	0.014	1	1	-	1.02	0.923|1.107	0.017	1|1	0.925|0.902	0.88	0.838|0.921	0.003	1|1	0.797|0.938	1.08	1.136|1.026	0.006	1|1	0.899|0.972	0.97	1.108|0.825	0.040	1|1	0.892|0.707	0.92	0.850|0.994	0.010	1|1	0.841|0.996	0.86	0.903|0.823	0.003	1|1	0.890|0.790	Unigene15274_17	MDAQKLTELLRATIEPNPEQRKAAEDQLAQIHKIIGFVPTILQIVMQNNVDQPVRQAGAIYLKNLITNSWSDHESKAGEPIPFSIHEQDRAMIRGSIVDAIVHAPDIIKVQLAVCVNHIIRNDFPGRWPQVVDNISIYLQNPDVNGWNGALVTMYQLVKTYEYKRSEERVPLNEAMNLLLPMIYQLMANLMNDQSEQSMLLQKQILKIYYALTQYTLPLDLITKETFSQWMEICRQIAERPIPDCSHIDDEEKPEFPWWKVKKWALHIIVRMFERYGSPRNVVSEKYQKFAEWYLPTFTSGILDVLLKILDQYRNHIYVSPRVLTDILSYLKNAVSHAYSWKLIKPHMVAIVQDVIFPIMSFTDADQELWETDPHEYLRLKFDIFEDYATPVPAAQSLL…	86.46	0.0	gi|195376729|ref|XP_002047145.1|	GJ12092 [Drosophila virilis]	51.89	0.0	sp|Q9EPL8|IPO7_MOUSE	Importin-7 OS=Mus musculus GN=Ipo7 PE=1 SV=2	86.46	0.0
484	Unigene31725_17	GF10870 [Drosophila ananassae]	17585.749516	0.270	3	12	-	1.01	0.992|1.033	0.001	12|12	0.968|0.876	1.17	1.173|1.161	0.000	10|11	0.010|0.014	1.18	1.129|1.229	0.005	12|12	0.346|0.044	0.86	0.836|0.881	0.001	12|12	0.008|0.014	1.24	1.275|1.199	0.003	11|10	0.000|0.005	1.12	1.162|1.072	0.004	11|12	0.041|0.662	Unigene31725_17	MTQMTQDEIISNTKTVLQGLEALRVEHVSLMTGMGEAHRENEKSDIVRKNIEHIELGLSEAQVMMALASHLQNIEAEKQKLKTQVRRLHQENAWLRDELANTQQKFQASEQLVAQLEEEKKHLEFMASVKKYDDNQEQEDSCEKSRSDPVVE	99.34	8e-83	gi|312285806|gb|ADQ64593.1|	hypothetical protein [Bactrocera oleae]	86.84	7e-74	sp|P46824|KLC_DROME	Kinesin light chain OS=Drosophila melanogaster GN=Klc PE=1 SV=1	99.34	4e-82
485	Unigene15481_17	GI22948 [Drosophila mojavensis]	20455.481728	0.287	4	16	-	0.81	0.799|0.826	0.000	14|14	0.001|0.008	1.32	1.187|1.455	0.036	16|15	0.005|0.001	0.6	0.637|0.560	0.003	14|14	0.001|0.001	1.37	1.466|1.265	0.020	16|16	0.001|0.001	0.98	0.995|0.970	0.000	15|15	0.963|0.797	1.53	1.435|1.634	0.020	14|15	0.001|0.001	Unigene15481_17	NMRSLLMVVAFAFVLIQSCIALKEDECEVCVKTVKRFADTLDDATKDHKEIESKFKSFCKKQKNKEHRFCYYLGGLEESATGILNELTKPLSWSMPAEKICEKLKKKDAQICDLRYEKQIDLNNVDLKKLKVRDLKKVLNDWDESCEGCIEKTDFIKRIEELKPKYVHSEL	80.35	5e-57	gi|17137698|ref|NP_477445.1|	mesencephalic astrocyte-derived neurotrophic factor [Drosophila melanogaster]	80.35	7e-58	sp|Q9XZ63|ARMET_DROME	Mesencephalic astrocyte-derived neurotrophic factor homolog OS=Drosophila melanogaster GN=Manf PE=1 SV=2	76.02	4e-52
486	Unigene6917_17	183 1853 phosphoglucomutase [Drosophila melanogaster]	61095.9023260001	0.048	3	10	-	1.11	1.070|1.158	0.004	9|8	0.306|0.043	1.17	1.001|1.344	0.059	10|10	0.995|0.031	0.99	1.001|0.974	0.000	10|10	0.991|0.721	1.15	1.204|1.086	0.007	10|10	0.019|0.133	1.02	1.114|0.917	0.019	10|10	0.361|0.205	1.02	0.906|1.134	0.026	10|10	0.105|0.342	Unigene6917_17	TVSVIATKPYEGQKPGTSGLRKKVKVFTQQNYTENFVQCILDANGAALEGALLVVGGDGRYYCKEAAELIIRMCAANGVGKLLVGQNGILSTPAVSSLIRNHKALGGIVLTASHNPGGPENDFGIKFNCENGGPAPDAVTNNIYQLSTAINEYKIVNGLEIDISKIGTKKYEINGKPYVVEVIDSVANYVSYMKEIFDFEKLRDFVSGKTSGKPLKMRIDSLNGVTGSYVREIFLNSLGAAENCVVHTTPLPDFGGLHPDPNLTYAKDLVETVSQGDYDIGAAFDGDGDRNMIIGHRAFFVTPSDSLAVIANNLECIPYFKKNGIQGFARSMPTASAVDLVGKKLGKEVFEVPTGWKYFGNLMDAGRLCLCGEESFGTGSNHIREKDGIWAVLAWLSVM…	86.71	0.0	gi|12006771|gb|AAG44910.1|AF290323_1	phosphoglucomutase [Drosophila melanogaster]	86.36	0.0	sp|Q9VUY9|PGM_DROME	Phosphoglucomutase OS=Drosophila melanogaster GN=Pgm PE=1 SV=1	86.89	0.0
487	Unigene32626_17	gamma-SNAp [Glossina morsitans morsitans]	35916.056132	0.025	1	1	-	0.85	0.871|0.827	0.001	1|1	0.860|0.799	1.02	0.992|1.040	0.001	1|1	0.993|0.968	1.15	1.207|1.096	0.006	1|1	0.834|0.911	0.74	0.748|0.722	0.000	1|1	0.596|0.446	1.36	1.370|1.346	0.000	1|1	0.643|0.669	1.18	1.109|1.248	0.010	1|1	0.888|0.748	Unigene32626_17	KTEEGQELIRQAEKSLKVGLLKWRPDYDVAADEYTKAATAFRIAKSFDQSKECLLKAIDCHKNNRSWFHAAKCYEQIILILKETNSLLEIEENVNKACNLYQQHGSPEAAATALDKAAKIVEQKHPEIALNFYKHALEVVMLDDSTRHAAEYASKISRILVKLNKYDQAADAIRREIGLNQQTESYGQIGRLAVALVLVQLARGDFVAAEKAFKEWGNCCDSDEVQTLEILLQAFDDEDAESAKRALAAPFIRHMDVEYSILARDIPLPHGLATTSKADVIKDAARSYMSPNTEQADDGLTKPSVPNDDEDEEEEGLC	68.24	1e-110	gi|157126634|ref|XP_001654683.1|	gamma-soluble nsf attachment protein (snap) [Aedes aegypti]	37.38	9e-44	sp|Q9CWZ7|SNAG_MOUSE	Gamma-soluble NSF attachment protein OS=Mus musculus GN=Napg PE=1 SV=1	74.49	2e-118
488	Unigene6550_17	129 428 LEN=654_ minus strand_ translated	11312.006329	0.080	1	5	-	0.82	0.807|0.826	0.000	5|5	0.101|0.131	0.63	0.553|0.712	0.013	4|5	0.002|0.021	0.59	0.629|0.549	0.003	3|5	0.040|0.001	1.38	1.521|1.247	0.038	3|5	0.016|0.021	0.45	0.481|0.417	0.002	5|5	0.000|0.000	0.77	0.645|0.894	0.031	5|4	0.003|0.529	Unigene6550_17	MKSVTSSMLLLICLGIWLISASGQTDAEPNFGARGAAWPILRLVQVIPPDSLIPRRRVKRVKRGVFDRTIDPEYEYQNATERGKVRFPVWDDAKGDPLLD	-	-	-	-	-	-	-	-	-	-
489	Unigene14609_17	GA28406 [Drosophila pseudoobscura pseudoobscura]	8221.028822	0.162	1	1	Unigene14440_17;Unigene14441_17	1.19	1.278|1.094	0.017	1|1	0.729|0.912	0.97	1.004|0.941	0.002	1|1	0.995|0.950	1.38	1.499|1.262	0.028	1|1	0.570|0.760	0.86	0.869|0.846	0.000	1|1	0.828|0.746	1.13	1.084|1.171	0.004	1|1	0.934|0.856	0.82	0.784|0.847	0.002	1|1	0.720|0.813	Unigene14609_17	MKAFAFLIFALALAAPAFGEVLNRCSLAREMSGLGVPRDQLARWTCIAEHESSYRTDVVGPTNYNGSNDYGIFQ	87.50	2e-22	gi|195190306|ref|XP_002029500.1|	GL21426 [Drosophila persimilis]	87.50	5e-23	sp|P37159|LYSE_DROME	Lysozyme E OS=Drosophila melanogaster GN=LysE PE=2 SV=2	87.50	1e-21
490	Unigene7658_17	uncharacterized conserved protein [Glossina morsitans morsitans]	24248.403061	0.042	1	2	-	2.05	2.063|2.030	0.001	2|2	0.048|0.045	1.98	1.616|2.341	0.263	2|2	0.156|0.036	2.25	2.580|1.928	0.213	2|2	0.017|0.075	0.96	1.095|0.821	0.038	2|2	0.861|0.503	1.97	1.982|1.967	0.000	2|2	0.050|0.076	0.94	0.852|1.036	0.017	2|2	0.773|0.958	Unigene7658_17	MYQEYLNQLQTSIAPLSSDELKDLLNDDEKLDEKVSEVLEDLKTQKDDLLIENRSKAESNIEKEPKIIELRGKVNELMEEAKKYCQAVQEKLAEVKEKSGSVSQETALALIQTAAAESEEETDVFIKKFTENEIGVDAFLDDFLVTRKTMHLRKLKAEKMQELMRKLTPAAQRGNIGSHLLPNSGFYPSAGVPGMNSGGVPYPLGPIMPMPPPRPY	63.37	3e-54	gi|195395916|ref|XP_002056580.1|	GJ10145 [Drosophila virilis]	33.86	1e-14	sp|Q9H9H4|VP37B_HUMAN	Vacuolar protein sorting-associated protein 37B OS=Homo sapiens GN=VPS37B PE=1 SV=1	63.37	1e-53
491	CL1735.Contig2_17	SD18370p [Drosophila melanogaster]	22223.213756	0.394	6	88	CL1735.Contig1_17	0.94	0.956|0.919	0.001	82|85	0.335|0.206	0.91	0.909|0.907	0.000	79|74	0.001|0.014	0.94	0.915|0.968	0.001	80|84	0.002|0.429	0.97	0.944|0.996	0.001	81|83	0.242|0.943	0.91	0.918|0.911	0.000	82|77	0.000|0.002	0.98	0.975|0.989	0.000	79|84	0.620|0.856	CL1735.Contig2_17	SLVHFFIGALVTAIGTYYYYNHHVQIDSNNMSGPDPKTAKTIYEFTVKDTHGNDVSLEKYKGNVVLIVNIASKCGLTKNNYAKLTNLLEQYEEKGLRILNFPCNQFNSQMPESDGEAMVCHLRDAKANIGDVFQKVDVNGSGAAPLYQFLKHKQSGTLGSAIKWNFTKFLVNKDGVPVDRYAPTTDPMDIAKDIEKLL	73.74	9e-84	gi|24656767|ref|NP_728868.1|	PHGPx, isoform C [Drosophila melanogaster]	54.76	3e-47	sp|O23814|GPX4_SPIOL	Probable phospholipid hydroperoxide glutathione peroxidase OS=Spinacia oleracea PE=2 SV=1	73.74	3e-83
492	CL2402.Contig1_17	LP21080p [Drosophila melanogaster]	65202.3300310002	0.042	2	3	-	1.16	1.343|0.972	0.069	3|3	0.178|0.941	1.45	1.615|1.279	0.056	3|3	0.336|0.836	1.22	1.116|1.330	0.023	3|3	0.905|0.454	0.95	0.717|1.186	0.110	3|3	0.614|0.871	1.56	1.762|1.358	0.082	3|3	0.022|0.866	1.25	1.191|1.301	0.006	3|3	0.874|0.727	CL2402.Contig1_17	MASLVGEQQISSNNQEAEPVQKVDSREGSVERKVCKDRDEKLKLARERQNEERQRKIEELKAQAEAAQRYREQKEEERRRRIEEIRQRDTEKRHQVEERKRAITEAEKERREYILRKNQERESRLETKKGPRSSVAFAFGSSTPRLLEPDFGLVSPSTYLGHRRSTSISNVTGASLSRRSSERELTDSGAKKRATSAGGTDRHEDDSVDSHATQIVFRSVARRKTDLMPTIPSPRDGHYGSRSSLSHTPRTPGSRSGNVTPGGNISTSRPGSAMSTSTNLSTSGYVARRSVPATRKQRPASIAGTGMSLEDLNKHKKDNRPPVKALTPSSTTASAQNTPKRTSNLMSTSMIVSSSSRLSSAEKKTPAKRESVTHKVSTPKSLSKTSSSDRLNRASKDIM…	62.53	1e-110	gi|62484442|ref|NP_728939.2|	ensconsin, isoform E [Drosophila melanogaster]	-	-	-	-	62.53	4e-110
493	Unigene7319_17	1 254 LEN=254_ minus strand_ translated	10073.665699	0.153	1	1	-	1.25	1.441|1.064	0.071	1|1	0.593|0.941	1.01	1.098|0.912	0.017	1|1	0.903|0.928	1.37	1.518|1.228	0.042	1|1	0.564|0.795	0.92	0.869|0.965	0.005	1|1	0.846|0.945	1.09	1.045|1.143	0.005	1|1	0.963|0.883	0.83	0.813|0.850	0.001	1|1	0.773|0.830	Unigene7319_17	XIYDFVAQSYRRIYKGNVQQLSQLEYVRTSCEDGYILQGTQSLTCRGGKWDGTMPKCVEETTCDVGLLDDCTWPLKCEIYDFVAQ	-	-	-	-	-	-	-	-	-	-
494	Unigene7198_17	236 1072 minus strand Ras suppressor protein [Glossina morsitans morsitans]	31629.894208	0.100	2	2	-	1.29	1.251|1.335	0.004	2|2	0.638|0.462	1.08	1.042|1.119	0.003	2|2	0.956|0.873	1.4	1.194|1.614	0.088	2|2	0.743|0.189	0.97	0.859|1.082	0.025	2|2	0.741|0.843	1.12	1.258|0.987	0.037	2|2	0.601|0.988	0.84	0.883|0.797	0.004	2|2	0.838|0.630	Unigene7198_17	SCLPVNAKMSKAKKVLDEARETQNRELDLVDKGISSFEELPGLFNMSYITRLTLSHNKITMISPGIANLLNLEILNLSNNGLRELPVSLSSMPKLRILNVSLNRLDSLPRGFGAFPVLEVLDLSYNNLNENVLPGNFFMIETLRALYLGDNDFEHIPKELGNLKNLQILGLRDNDLLDLPREIGELTRLRELHVQNNRLQVLPPEVGNLDLLGSKSVMKMEENPWVVPIQEQYLLGISHVIEYIKTETYKILYNRHIKSDRGPPPPKADKSKKASRVRA	87.10	2e-118	gi|195156083|ref|XP_002018930.1|	GL25689 [Drosophila persimilis]	61.26	2e-82	sp|Q15404|RSU1_HUMAN	Ras suppressor protein 1 OS=Homo sapiens GN=RSU1 PE=1 SV=3	90.11	2e-123
495	Unigene14779_17	GI16669 [Drosophila mojavensis]	98989.9032589998	0.014	1	2	-	0.86	0.844|0.883	0.001	2|2	0.731|0.815	0.94	0.944|0.943	0.000	2|2	0.928|0.938	0.94	0.861|1.012	0.011	2|2	0.796|0.979	0.93	0.870|0.984	0.006	2|2	0.764|0.961	1.02	1.077|0.957	0.007	2|2	0.908|0.950	1.08	1.084|1.072	0.000	2|2	0.892|0.907	Unigene14779_17	RLPNATEPVHYDVELTTNVHNGTKIFQGTVKIAIKVIEDATTIVLHKRQLNILKVTIKNTDETNAAEENLNVAYENEREFLTLTPVSQTVKFNKGSNWNLTISYTGELRTDNGGFYLSTYTDVLGKERYLATTQFESTDARHAFPCYDEPAKRATFSIVLNHDPSYNAISNMPLDENLSKPGYSVFQKTVIMPTYLVAFIVSDFEYTEAVLNARPQRIYTRPGTVDDQEFALVSGLLLLHRLEEYYNVKFTLPKVYQVGVPDFAAGAMENWGLVTYRESYMLYNTVNSTTNTQTGIATTIAHEYCHQWFGNLVTMEWWTHLWLNEGYASFVEFLCVNHLFPEYDIWTQFVTDMYTRALELDSLKNSHPIEVPVGHPCEIDEIFDEISYNKGASVIRMLH…	65.47	0.0	gi|195135151|ref|XP_002011998.1|	GI16669 [Drosophila mojavensis]	48.10	0.0	sp|Q11011|PSA_MOUSE	Puromycin-sensitive aminopeptidase OS=Mus musculus GN=Npepps PE=1 SV=2	65.47	0.0
496	Unigene14549_17	110 661 minus strand calponin [Glossina morsitans morsitans]	20384.483747	0.999	13	612	-	0.82	0.827|0.820	0.000	570|566	0.001|0.001	0.93	0.902|0.963	0.002	546|550	0.001|0.038	0.7	0.721|0.687	0.001	595|594	0.001|0.001	1.21	1.259|1.160	0.005	558|597	0.001|0.001	0.82	0.832|0.803	0.000	577|543	0.000|0.000	1.18	1.110|1.253	0.010	539|576	0.001|0.001	Unigene14549_17	MSLERAIRNKIAGKRNPEMDKQAQEWIEAILGSKFPAGVDYDEHLRDGQVFCALINKLAPNSVPKVNSSGGQFKMMENINNFQKALKEYGVPDLDVFQTVDLWEKKDIAQVTNTVFALGRATYKHPEFKGPFLGPKPADECKRDFSEEQLRAGHGIIGLQAGSNKGATQAGQNIGASRKILLGK	84.78	9e-89	gi|195379924|ref|XP_002048722.1|	GJ21167 [Drosophila virilis]	82.61	1e-88	sp|P14318|MP20_DROME	Muscle-specific protein 20 OS=Drosophila melanogaster GN=Mp20 PE=2 SV=2	82.61	3e-89
497	CL1153.Contig1_17	GK22578 [Drosophila willistoni]	33476.86462	0.056	1	1	-	1.66	1.523|1.804	0.039	1|1	0.513|0.296	1.2	1.186|1.220	0.001	1|1	0.803|0.818	1.95	2.066|1.836	0.026	1|1	0.267|0.327	0.87	0.998|0.739	0.034	1|1	0.998|0.486	1.4	1.215|1.576	0.065	1|1	0.797|0.487	0.72	0.792|0.652	0.010	1|1	0.736|0.482	CL1153.Contig1_17	MRSTLLDELNQNGYVVIKDFLTLTEIDELYSAGRALYLDAPQENRKIFSTVNQKDAHSRETYFLDSGDKVRFFFEEGAFDENGELLVDPMIALNKVGHYLHVQHPIFNKITFSNRVKEVCWQLNFNKPAVCQSMYIYKNPGIGGEVISHQDSWFLHTEPNSVIGFWFALEDCTTQNGCLEVIKGSHKSGIHRLYKRNPDKEANQLLIYDRPPPIYPQSSYTPLLVSKGTCIIIHGNVVHKSEQNRSQKSRHAYTFHVIETENNVKYSKDNWLQPTKDKPFPILFERK	78.40	7e-140	gi|195449154|ref|XP_002071949.1|	GK22578 [Drosophila willistoni]	42.66	2e-62	sp|Q9NAM7|PHYD1_CAEEL	Phytanoyl-CoA dioxygenase domain-containing protein 1 homolog OS=Caenorhabditis elegans GN=Y105C5B.9 PE=3 SV=1	78.40	3e-139
[truncated: 1,761 more rows]
[truncated: 13 more columns]
